# Supplementary material
Source: publisher figshare collection journal article supplement (https://gsajournals.figshare.com/ndownloader/files/35373781)
Supplement: Supplementary file 1 [file 35373781]

## Sheet: Supplementary Table S11
Supplementary Table S11. Genomic information (RefGen_v4) for the top 0.5% of SNP-gene pairs identified in the Fisher's combined test
Phenotype	SNP ID	Chr	Position (bp)	Gene ID	Gene start	Gene end	Gene strand	Gene name	Gene description	Gene type	Gene biotype	a priori candidate gene	SNP to gene distance (bp)	Ames GWAS locus number	GWAS peak SNP ID	SNP to gene distance (bp)	GWAS P-value	TWAS P-value	TWAS rank	TWAS ranking %	FCT P-value	FCT rank peak SNP	FCT ranking % peak SNP	NAM JL-QTL CSI ID	NAM JL-QTL traits	NAM GWAS peak SNP	NAM GWAS peak SNP RMIP	NAM GWAS peak SNP to Ames SNP	NAM GWAS peak SNP to gene
αT	5_205826541	5	205826541	Zm00001d017746	205825586	205829216	+	vitamin E synthesis4	vitamin E synthesis4	gene	protein_coding	Yes	955	αT_1	5_205826541	within	3.35737e-94	8.22311e-23	1	0.00451753	7.37366e-114	1	0.00277316	NAM_JL_28	αT, γT, αT3, γT3	5_205828139	0.98	1598	within
αT	5_205890339	5	205890339	Zm00001d017751	205889941	205895577	+	organelle transcript processing51	Pentatricopeptide repeat-containing protein chloroplastic	gene	protein_coding		398	αT_1	5_205826541	within	3.75531e-74	0.00186467	62	0.280087	1.2349e-74	2	0.00554631	NAM_JL_28	αT, γT, αT3, γT3	5_205828139	0.98	62200	61802
αT	5_205852534	5	205852534	Zm00001d017748	205851491	205853476	+		3-dehydrosphinganine reductase TSC10B	gene	protein_coding		1043	αT_1	5_205826541	within	2.35168e-73	0.00325566	99	0.447235	1.33189e-73	3	0.00831947	NAM_JL_28	αT, γT, αT3, γT3	5_205828139	0.98	24395	23352
αT	5_205890339	5	205890339	Zm00001d017752	205893484	205894854	-		Transcription factor GT-3b	gene	protein_coding		-3145	αT_1	5_205826541	3145	3.75531e-74	0.446828	9968	45.0307	2.86723e-72	4	0.0110926	NAM_JL_28	αT, γT, αT3, γT3	5_205828139	0.98	62200	65345
αT	5_205747138	5	205747138	Zm00001d017743	205749775	205753794	+		Cell division control protein 48 homolog D	gene	protein_coding		-2637	αT_1	5_205826541	2637	8.73612e-65	1			1.29732e-62	5	0.0138658	NAM_JL_28	αT, γT, αT3, γT3	5_205828139	0.98	81001	74345
αT	5_205849230	5	205849230	Zm00001d017747	205846897	205847565	+		General transcription factor 2-related zinc finger protein	gene	protein_coding		2333	αT_1	5_205826541	1665	1.74885e-60	1			2.42384e-58	6	0.0166389	NAM_JL_28	αT, γT, αT3, γT3	5_205828139	0.98	21091	18758
αT	5_205742475	5	205742475	Zm00001d017742	205734245	205737675	-	GRF-transcription factor 6	Growth-regulating factor 6	gene	protein_coding		8230	αT_1	5_205826541	4800	1.38774e-49	0.136722	3141	14.1896	2.19122e-48	7	0.0194121	NAM_JL_28	αT, γT, αT3, γT3	5_205828139	0.98	85664	90464
αT	5_205920515	5	205920515	Zm00001d017754	205924278	205940214	-		yeast YAK1-related gene 1	gene	protein_coding		-3763	αT_1	5_205826541	3763	1.10734e-46	0.104392	2425	10.955	1.2609e-45	8	0.0221852	NAM_JL_28	αT, γT, αT3, γT3	5_205828139	0.98	92376	96139
αT	5_205640412	5	205640412	Zm00001d017740	205615626	205616553	-		Expansin-B4	gene	protein_coding		24786	αT_1	5_205826541	23859	1.7826e-39	1			1.60831e-37	9	0.0249584	NAM_JL_28	αT, γT, αT3, γT3	5_205828139	0.98	187727	211586
αT	5_205898573	5	205898573	Zm00001d017753	205897970	205901088	+		Carboxylic ester hydrolase	gene	protein_coding		603	αT_1	5_205826541	within	1.51478e-38	0.20313	4571	20.6496	2.75934e-37	10	0.0277316	NAM_JL_28	αT, γT, αT3, γT3	5_205828139	0.98	70434	69831
αT	5_205877731	5	205877731	Zm00001d017749	205881374	205882818	+			gene	protein_coding		-3643	αT_1	5_205826541	3643	2.52894e-38	1			2.21461e-36	11	0.0305047	NAM_JL_28	αT, γT, αT3, γT3	5_205828139	0.98	49592	53235
αT	5_205031745	5	205031745	Zm00001d017713	205042879	205045991	+		Protein NRT1/ PTR FAMILY 8.3	gene	protein_coding		-11134	αT_1	5_205826541	11134	2.88266e-32	2.27524e-05	6	0.0271052	5.53001e-35	12	0.0332779	NAM_JL_28	αT, γT, αT3, γT3	5_205828139	0.98	796394	782148
αT	5_205128285	5	205128285	Zm00001d017719	205105870	205106370	+		60S ribosomal protein L12-3	gene	protein_coding		22415	αT_1	5_205826541	21915	2.27073e-30	7.77643e-07	4	0.0180701	1.47136e-34	13	0.036051	NAM_JL_28	αT, γT, αT3, γT3	5_205828139	0.98	699854	721769
αT	5_205525450	5	205525450	Zm00001d017731	205527426	205528156	-		Expansin-B4	gene	protein_coding		-1976	αT_1	5_205826541	1976	2.80159e-36	1			2.32147e-34	14	0.0388242	NAM_JL_28	αT, γT, αT3, γT3	5_205828139	0.98	302689	299983
αT	5_205177384	5	205177384	Zm00001d017720	205181529	205188957	-		DNA topoisomerase 2	gene	protein_coding		-4145	αT_1	5_205826541	4145	1.29546e-28	1.08265e-07	2	0.00903506	1.13959e-33	15	0.0415973	NAM_JL_28	αT, γT, αT3, γT3	5_205828139	0.98	650755	639182
αT	5_205301910	5	205301910	Zm00001d017726	205300454	205303606	+	G2-like-transcription factor 11	Homeodomain-like superfamily protein	gene	protein_coding		1456	αT_1	5_205826541	within	2.39579e-33	0.0533708	1269	5.73274	1.01067e-32	16	0.0443705	NAM_JL_28	αT, γT, αT3, γT3	5_205828139	0.98	526229	524533
αT	5_206008171	5	206008171	Zm00001d017756	206004272	206007539	-		Syntaxin-22	gene	protein_coding		3899	αT_1	5_205826541	632	9.97673e-30	0.000654916	27	0.121973	4.90752e-31	17	0.0471436	NAM_JL_28	αT, γT, αT3, γT3	5_205828139	0.98	180032	176133
αT	5_205580456	5	205580456	Zm00001d017737	205579980	205580792	-		Expansin-B4	gene	protein_coding		476	αT_1	5_205826541	within	1.29662e-32	1			9.64985e-31	18	0.0499168	NAM_JL_28	αT, γT, αT3, γT3	5_205828139	0.98	247683	247347
αT	5_206060299	5	206060299	Zm00001d017761	206061161	206062765	+			gene	protein_coding		-862	αT_1	5_205826541	862	1.18695e-27	1.97961e-05	5	0.0225876	1.73475e-30	19	0.05269	NAM_JL_28	αT, γT, αT3, γT3	5_205828139	0.98	232160	233022
αT	5_205480984	5	205480984	Zm00001d017730	205467077	205473131	-		Protein BREVIS RADIX	gene	protein_coding		13907	αT_1	5_205826541	7853	1.49582e-30	0.053021	1259	5.68757	5.75885e-30	20	0.0554631	NAM_JL_28	αT, γT, αT3, γT3	5_205828139	0.98	347155	355008
αT	5_204741386	5	204741386	Zm00001d017707	204745661	204751145	+		P-loop containing nucleoside triphosphate hydrolases superfamily protein	gene	protein_coding		-4275	αT_1	5_205826541	4275	3.83292e-29	0.044322	1086	4.90604	1.18149e-28	21	0.0582363	NAM_JL_28	αT, γT, αT3, γT3	5_205828139	0.98	1086753	1076994
αT	5_204808496	5	204808496	Zm00001d017709	204804612	204808574	+		Secretory carrier-associated membrane protein 4	gene	protein_coding		3884	αT_1	5_205826541	within	6.28991e-29	0.03871	948	4.28262	1.6846e-28	22	0.0610094	NAM_JL_28	αT, γT, αT3, γT3	5_205828139	0.98	1019643	1019565
αT	5_205080549	5	205080549	Zm00001d017717	205082975	205085670	+		ADP-ribosylation factor B1B	gene	protein_coding		-2426	αT_1	5_205826541	2426	3.1081e-27	0.00079518	32	0.144561	1.7096e-28	23	0.0637826	NAM_JL_28	αT, γT, αT3, γT3	5_205828139	0.98	747590	742469
αT	5_205055733	5	205055733	Zm00001d017714	205056209	205061640	+		Protein NRT1/ PTR FAMILY 8.3	gene	protein_coding		-476	αT_1	5_205826541	476	1.06653e-29	0.43914	9791	44.2311	3.20982e-28	24	0.0665557	NAM_JL_28	αT, γT, αT3, γT3	5_205828139	0.98	772406	766499
αT	5_205577865	5	205577865	Zm00001d017736	205576400	205576981	-		Expansin-B4	gene	protein_coding		1465	αT_1	5_205826541	884	5.97621e-30	1			4.08114e-28	25	0.0693289	NAM_JL_28	αT, γT, αT3, γT3	5_205828139	0.98	250274	251158
αT	5_204974201	5	204974201	Zm00001d017712	204965594	204969901	+	WRKY-transcription factor 46	Probable WRKY transcription factor 14	gene	protein_coding		8607	αT_1	5_205826541	4300	3.11591e-29	1			2.07639e-27	26	0.0721021	NAM_JL_28	αT, γT, αT3, γT3	5_205828139	0.98	853938	858238
αT	5_204886673	5	204886673	Zm00001d017711	204910256	204912526	+		Phosphoribulokinase	gene	protein_coding		-23583	αT_1	5_205826541	23583	4.26979e-29	1			2.83187e-27	27	0.0748752	NAM_JL_28	αT, γT, αT3, γT3	5_205828139	0.98	941466	915613
αT	5_204753417	5	204753417	Zm00001d017708	204751694	204753491	-			gene	protein_coding		1723	αT_1	5_205826541	within	2.71888e-27	0.0157055	398	1.79798	2.83209e-27	28	0.0776484	NAM_JL_28	αT, γT, αT3, γT3	5_205828139	0.98	1074722	1074648
αT	5_205089429	5	205089429	Zm00001d017718	205088109	205091684	+			gene	protein_coding		1320	αT_1	5_205826541	within	4.87473e-28	0.296613	6594	29.7886	9.4134e-27	29	0.0804215	NAM_JL_28	αT, γT, αT3, γT3	5_205828139	0.98	738710	736455
αT	5_205299171	5	205299171	Zm00001d001727	205298996	205299324	+			ncRNA_gene	lincRNA		175	αT_1	5_205826541	within	3.67508e-28	1			2.35833e-26	30	0.0831947	NAM_JL_28	αT, γT, αT3, γT3	5_205828139	0.98	528968	528815
αT	5_205266828	5	205266828	Zm00001d017724	205288559	205291755	-	bHLH-transcription factor 122	Helix-loop-helix DNA-binding domain containing protein	gene	protein_coding		-21731	αT_1	5_205826541	21731	4.09368e-28	1			2.62253e-26	31	0.0859678	NAM_JL_28	αT, γT, αT3, γT3	5_205828139	0.98	561311	536384
αT	5_204810828	5	204810828	Zm00001d017710	204812710	204815514	-			gene	protein_coding		-1882	αT_1	5_205826541	1882	4.26256e-28	1			2.729e-26	32	0.088741	NAM_JL_28	αT, γT, αT3, γT3	5_205828139	0.98	1017311	1012625
αT	5_205561294	5	205561294	Zm00001d017735	205560304	205561065	-		Expansin-B4	gene	protein_coding		990	αT_1	5_205826541	229	4.63402e-28	1			2.96294e-26	33	0.0915141	NAM_JL_28	αT, γT, αT3, γT3	5_205828139	0.98	266845	267074
αT	5_205313089	5	205313089	Zm00001d017727	205304084	205306760	-	alternative oxidase1	alternative oxidase1	gene	protein_coding		9005	αT_1	5_205826541	6329	1.62852e-27	0.40071	8925	40.3189	4.15008e-26	34	0.0942873	NAM_JL_28	αT, γT, αT3, γT3	5_205828139	0.98	515050	521379
αT	5_205458986	5	205458986	Zm00001d017729	205460032	205467029	+		Serine/threonine-protein kinase MHK	gene	protein_coding		-1046	αT_1	5_205826541	1046	2.70102e-26	0.036332	897	4.05222	6.20092e-26	35	0.0970605	NAM_JL_28	αT, γT, αT3, γT3	5_205828139	0.98	369153	361110
αT	5_205211486	5	205211486	Zm00001d017723	205200298	205200370	-			ncRNA_gene	tRNA		11188	αT_1	5_205826541	11116	1.48501e-27	1			9.32209e-26	36	0.0998336	NAM_JL_28	αT, γT, αT3, γT3	5_205828139	0.98	616653	627769
αT	5_204678158	5	204678158	Zm00001d017703	204683247	204687276	+		survival motor neuron protein	gene	protein_coding		-5089	αT_1	5_205826541	5089	2.30587e-25	0.0217146	548	2.47561	3.08233e-25	37	0.102607	NAM_JL_28	αT, γT, αT3, γT3	5_205828139	0.98	1149981	1140863
αT	5_204705037	5	204705037	Zm00001d017706	204700264	204702470	-		Pentatricopeptide repeat-containing protein	gene	protein_coding		4773	αT_1	5_205826541	2567	9.66964e-27	1			5.88889e-25	38	0.10538	NAM_JL_28	αT, γT, αT3, γT3	5_205828139	0.98	1123102	1125669
αT	5_205296539	5	205296539	Zm00001d017725	205294819	205296713	+		Cell division cycle 20.1 cofactor of APC complex	gene	protein_coding		1720	αT_1	5_205826541	within	7.96623e-26	1			4.6835e-24	39	0.108153	NAM_JL_28	αT, γT, αT3, γT3	5_205828139	0.98	531600	531426
αT	5_205069033	5	205069033	Zm00001d017715	205061679	205067355	-		Expressed protein%3B protein	gene	protein_coding		7354	αT_1	5_205826541	1678	1.55612e-25	1			9.04456e-24	40	0.110926	NAM_JL_28	αT, γT, αT3, γT3	5_205828139	0.98	759106	760784
αT	5_205197671	5	205197671	Zm00001d017721	205190183	205198427	-		Tudor/PWWP/MBT superfamily protein	gene	protein_coding		7488	αT_1	5_205826541	within	6.23877e-25	0.778166	17269	78.0132	2.76649e-23	41	0.113699	NAM_JL_28	αT, γT, αT3, γT3	5_205828139	0.98	630468	629712
αT	5_205949903	5	205949903	Zm00001d017755	205944885	205951175	-		Rop guanine nucleotide exchange factor 14	gene	protein_coding		5018	αT_1	5_205826541	within	1.06682e-23	0.725542	16097	72.7186	4.19641e-22	42	0.116473	NAM_JL_28	αT, γT, αT3, γT3	5_205828139	0.98	121764	116746
αT	5_204690036	5	204690036	Zm00001d017704	204688990	204692437	+		Target of Myb protein 1	gene	protein_coding		1046	αT_1	5_205826541	within	6.88962e-22	0.0334421	832	3.75858	1.22401e-21	43	0.119246	NAM_JL_28	αT, γT, αT3, γT3	5_205828139	0.98	1138103	1135702
αT	5_206106362	5	206106362	Zm00001d001728	206105920	206106223	+			ncRNA_gene	lincRNA		442	αT_1	5_205826541	139	6.61858e-22	1			3.29387e-20	44	0.122019	NAM_JL_28	αT, γT, αT3, γT3	5_205828139	0.98	278223	277781
αT	5_206293529	5	206293529	Zm00001d017769	206295967	206299220	+		Ornithine carbamoyltransferase chloroplastic	gene	protein_coding		-2438	αT_1	5_205826541	2438	1.28152e-17	0.197218	4445	20.0804	1.04936e-16	45	0.124792	NAM_JL_28	αT, γT, αT3, γT3	5_205828139	0.98	465390	467828
αT	5_206191505	5	206191505	Zm00001d017764	206193774	206194431	+			gene	protein_coding		-2269	αT_1	5_205826541	2269	3.50429e-17	1			1.36282e-15	46	0.127565	NAM_JL_28	αT, γT, αT3, γT3	5_205828139	0.98	363366	365635
αT	5_206877963	5	206877963	Zm00001d017788	206876258	206880405	-	C2C2-Dof-transcription factor 29	Dof zinc finger protein DOF2.1	gene	protein_coding		1705	αT_1	5_205826541	within	5.7599e-17	0.796127	17655	79.757	1.77101e-15	47	0.130338					0
αT	5_206412864	5	206412864	Zm00001d017777	206411178	206414574	+		Adenine nucleotide alpha hydrolases-like superfamily protein	gene	protein_coding		1686	αT_1	5_205826541	within	2.39892e-15	0.0230335	584	2.63824	2.12372e-15	48	0.133111	NAM_JL_28	αT, γT, αT3, γT3	5_205828139	0.98	584725	583039
αT	5_200125151	5	200125151	Zm00001d017574	200131675	200141300	+		ORMDL family protein	gene	protein_coding		-6524	αT_1	5_205826541	6524	9.51389e-17	0.969987	21496	97.1088	3.49954e-15	49	0.135885	NAM_JL_27	δT			0
αT	5_206412864	5	206412864	Zm00001d017778	206414473	206416485	-	bHLH-transcription factor 29	Transcription factor bHLH63	gene	protein_coding		-1609	αT_1	5_205826541	1609	2.39892e-15	0.0472302	1154	5.21323	4.27332e-15	50	0.138658	NAM_JL_28	αT, γT, αT3, γT3	5_205828139	0.98	584725	586334
αT	5_206140283	5	206140283	Zm00001d017762	206138068	206140902	+	abscisic acid 8'-hydroxylase1	abscisic acid 8'-hydroxylase1	gene	protein_coding		2215	αT_1	5_205826541	within	2.08513e-16	0.547903	12141	54.8473	4.30798e-15	51	0.141431	NAM_JL_28	αT, γT, αT3, γT3	5_205828139	0.98	312144	309929
αT	5_206802506	5	206802506	Zm00001d017787	206752152	206757266	-		Monodehydroascorbate reductase 4 peroxisomal	gene	protein_coding		50354			45240	2.21739e-12	0.000107485	8	0.0361402	8.81193e-15	52	0.144204					0
αT	5_201981816	5	201981816	Zm00001d017620	201983972	201987023	+		Tobamovirus multiplication protein 3	gene	protein_coding		-2156			2156	1.16495e-14	0.0699142	1632	7.37261	2.91123e-14	53	0.146977					0
αT	5_200069029	5	200069029	Zm00001d017573	200047657	200053076	+		Transcription factor bHLH157	gene	protein_coding		21372	αT_1	5_205826541	15953	5.98534e-15	0.981314	21740	98.2111	1.98338e-13	54	0.14975	NAM_JL_27	δT			0
αT	5_201959190	5	201959190	Zm00001d017619	201958424	201958630	+		Putative uncharacterized protein [Source:UniProtKB/TrEMBL%3BAcc:B6U6D2]	gene	protein_coding		766	αT_1	5_205826541	560	8.27624e-15	0.940521	20860	94.2356	2.6066e-13	55	0.152524					0
αT	5_207651646	5	207651646	Zm00001d017818	207638868	207671710	-		Protease Do-like 7	gene	protein_coding		12778			within	7.10198e-14	0.248991	5553	25.0858	5.77646e-13	56	0.155297					0
αT	5_207627349	5	207627349	Zm00001d017817	207626509	207626934	-			gene	protein_coding		840			415	5.13122e-14	0.568823	12624	57.0293	9.3882e-13	57	0.15807					0
αT	5_206600035	5	206600035	Zm00001d017782	206597153	206597443	+	MYB-related-transcription factor 78	SANT/MYB protein	gene	protein_coding		2882			2592	4.66225e-14	1			1.47778e-12	58	0.160843					0
αT	5_206898086	5	206898086	Zm00001d017789	206898283	206898994	+			gene	protein_coding		-197			197	6.28507e-14	0.785093	17401	78.6095	1.56123e-12	59	0.163616					0
αT	5_200163041	5	200163041	Zm00001d017575	200157732	200159935	-	C2C2-Dof-transcription factor 22	Dof zinc finger protein DOF2.5	gene	protein_coding		5309			3106	7.05968e-14	0.724809	16083	72.6554	1.61713e-12	60	0.166389	NAM_JL_27	δT			0
αT	5_206700428	5	206700428	Zm00001d017784	206700640	206701893	-	ZF-HD-transcription factor 12	Zinc-finger homeodomain protein 5	gene	protein_coding		-212			212	8.19019e-14	0.717689	15936	71.9913	1.84952e-12	61	0.169163					0
αT	5_206301045	5	206301045	Zm00001d017770	206299496	206304043	-		Soluble inorganic pyrophosphatase 2	gene	protein_coding		1549			within	1.06657e-13	0.571099	12672	57.2461	1.91441e-12	62	0.171936	NAM_JL_28	αT, γT, αT3, γT3	5_205828139	0.98	472906	471357
αT	5_209354499	5	209354499	Zm00001d017874	209352390	209357003	-		LORELEI-LIKE-GPI ANCHORED PROTEIN 3	gene	protein_coding		2109			within	2.78635e-11	0.00219563	71	0.320744	1.92252e-12	63	0.174709	NAM_JL_29	δT, δT3, ΣTT3			0
αT	5_207369157	5	207369157	Zm00001d017806	207369388	207372376	+	sister of liguleless narrow1	sister of liguleless narrow1	gene	protein_coding		-231			231	1.76546e-13	0.392524	8746	39.5103	2.16907e-12	64	0.177482					0
αT	5_204556294	5	204556294	Zm00001d017700	204553720	204562336	+	JUMONJI-transcription factor 15	Lysine-specific demethylase REF6	gene	protein_coding		2574			within	6.54903e-13	0.148041	3415	15.4274	3.0021e-12	65	0.180255	NAM_JL_28	αT, γT, αT3, γT3	5_205828139	0.98	1271845	1265803
αT	5_204447306	5	204447306	Zm00001d017692	204444229	204453361	+		NDR1/HIN1-like 8	gene	protein_coding		3077			within	1.74743e-13	0.801834	17772	80.2855	4.287e-12	66	0.183028	NAM_JL_28	αT, γT, αT3, γT3	5_205828139	0.98	1380833	1374778
αT	5_200236571	5	200236571	Zm00001d017577	200285812	200295114	-			gene	protein_coding		-49241			49241	1.44196e-12	0.197805	4459	20.1437	8.5241e-12	67	0.185801	NAM_JL_27	δT			0
αT	5_206382945	5	206382945	Zm00001d017773	206380933	206384191	+	TUB-transcription factor 9	TUB-transcription factor 9	gene	protein_coding		2012			within	3.82077e-12	0.121698	2820	12.7394	1.36689e-11	68	0.188575	NAM_JL_28	αT, γT, αT3, γT3	5_205828139	0.98	554806	552794
αT	5_207247365	5	207247365	Zm00001d017804	207299284	207300818	+	bHLH-transcription factor 89	Transcription factor bHLH83	gene	protein_coding		-51919			51919	5.36529e-13	1			1.56954e-11	69	0.191348					0
αT	5_206347024	5	206347024	Zm00001d017771	206343101	206346122	-		Isoflavone reductase	gene	protein_coding		3923			902	1.26642e-11	0.0714606	1676	7.57138	2.60012e-11	70	0.194121	NAM_JL_28	αT, γT, αT3, γT3	5_205828139	0.98	518885	514962
αT	5_204598945	5	204598945	Zm00001d017702	204630766	204635304	+	G2-like-transcription factor 47	Probable transcription factor KAN2	gene	protein_coding		-31821			31821	9.50262e-13	1			2.72554e-11	71	0.196894	NAM_JL_28	αT, γT, αT3, γT3	5_205828139	0.98	1229194	1192835
αT	5_201952995	5	201952995	Zm00001d001723	201953896	201954871	+			ncRNA_gene	lincRNA		-901			901	1.21867e-12	1			3.46506e-11	72	0.199667					0
αT	5_209501998	5	209501998	Zm00001d017880	209498712	209501781	+		Probable amino acid permease 7	gene	protein_coding		3286			217	4.67055e-11	0.0279476	704	3.18034	3.70244e-11	73	0.20244	NAM_JL_29	δT, δT3, ΣTT3			0
αT	5_203061604	5	203061604	Zm00001d017649	203055160	203056830	-		S-ribonuclease binding protein SBP1	gene	protein_coding		6444			4774	4.77935e-12	0.394341	8785	39.6865	5.27663e-11	74	0.205214					0
αT	5_209386858	5	209386858	Zm00001d017876	209361893	209367885	-		Phosphatidylinositol/phosphatidylcholine transfer protein SFH13	gene	protein_coding		24965			18973	8.19651e-11	0.0231761	587	2.65179	5.31694e-11	75	0.207987	NAM_JL_29	δT, δT3, ΣTT3			0
αT	5_206347943	5	206347943	Zm00001d017772	206349763	206353137	+		Cation cation antiporter	gene	protein_coding		-1820			1820	1.91221e-11	0.127936	2956	13.3538	6.78544e-11	76	0.21076	NAM_JL_28	αT, γT, αT3, γT3	5_205828139	0.98	519804	521624
αT	5_204540312	5	204540312	Zm00001d017699	204537835	204540181	+		Probable xyloglucan endotransglucosylase/hydrolase protein 30	gene	protein_coding		2477			131	4.59103e-12	0.693191	15380	69.4796	8.74328e-11	77	0.213533	NAM_JL_28	αT, γT, αT3, γT3	5_205828139	0.98	1287827	1287958
αT	5_206589990	5	206589990	Zm00001d017781	206584432	206587009	-			gene	protein_coding		5558			2981	2.49081e-11	0.13108	3023	13.6565	8.96153e-11	78	0.216306					0
αT	5_203112913	5	203112913	Zm00001d017650	203139983	203141495	+		Probable ADP-ribosylation factor	gene	protein_coding		-27070			27070	4.63334e-12	0.722559	16030	72.416	9.18075e-11	79	0.219079					0
αT	5_206198299	5	206198299	Zm00001d017765	206195445	206198744	+		WAT1-related protein	gene	protein_coding		2854			within	3.32359e-11	0.119112	2771	12.5181	1.07897e-10	80	0.221852	NAM_JL_28	αT, γT, αT3, γT3	5_205828139	0.98	370160	367306
αT	5_203248345	5	203248345	Zm00001d017654	203245360	203251909	-		GPI transamidase subunit PIG-U	gene	protein_coding		2985			within	6.11264e-10	0.0122971	315	1.42302	2.00051e-10	81	0.224626					0
αT	5_200616117	5	200616117	Zm00001d017582	200612130	200616453	-		cytochrome P450 family 87 subfamily A polypeptide 2	gene	protein_coding		3987			within	7.57259e-12	1			2.0148e-10	82	0.227399	NAM_JL_27	δT			0
αT	5_203489864	5	203489864	Zm00001d017666	203485525	203489990	-		Protein NRT1/ PTR FAMILY 7.2	gene	protein_coding		4339			within	6.64217e-11	0.117853	2740	12.378	2.08017e-10	83	0.230172					0
αT	5_207525803	5	207525803	Zm00001d017813	207525809	207526282	+		17.4 kDa class I heat shock protein 3	gene	protein_coding		-6			6	8.56459e-12	1			2.26819e-10	84	0.232945					0
αT	5_204366336	5	204366336	Zm00001d017691	204333624	204344512	-	GNAT-transcription factor 25	Histone acetyltransferase MCC1	gene	protein_coding		32712			21824	1.44044e-11	0.605653	13457	60.7924	2.30882e-10	85	0.235718	NAM_JL_28	αT, γT, αT3, γT3	5_205828139	0.98	1461803	1483627
αT	5_209428370	5	209428370	Zm00001d017877	209453899	209455860	+		Transmembrane 9 superfamily protein member 4	gene	protein_coding		-25529			25529	8.46422e-11	0.127347	2946	13.3086	2.82984e-10	86	0.238491	NAM_JL_29	δT, δT3, ΣTT3			0
αT	5_197880925	5	197880925	Zm00001d017507	197864412	197884322	+	MYB-related-transcription factor 11	Homeodomain-like superfamily protein	gene	protein_coding		16513			within	1.22412e-11	1			3.19815e-10	87	0.241265	NAM_JL_27	δT			0
αT	5_209224408	5	209224408	Zm00001d017871	209242050	209250119	+		Protein S-acyltransferase 18	gene	protein_coding		-17642			17642	4.9492e-11	0.368441	8191	37.0031	4.69142e-10	88	0.244038	NAM_JL_29	δT, δT3, ΣTT3			0
αT	5_206258868	5	206258868	Zm00001d017768	206249302	206254075	-			gene	protein_coding		9566			4793	3.02888e-11	0.633833	14073	63.5752	4.92933e-10	89	0.246811	NAM_JL_28	αT, γT, αT3, γT3	5_205828139	0.98	430729	421163
αT	5_198043390	5	198043390	Zm00001d017512	198082033	198085866	+		YbaK/aminoacyl-tRNA synthetase-associated domain	gene	protein_coding		-38643			38643	3.79066e-11	0.514197	11458	51.7618	5.00171e-10	90	0.249584	NAM_JL_27	δT			0
αT	5_207495779	5	207495779	Zm00001d017810	207491705	207497156	-			gene	protein_coding		4074			within	6.73424e-10	0.0316755	794	3.58692	5.45454e-10	91	0.252357					0
αT	5_207519436	5	207519436	Zm00001d017812	207515530	207524652	+		P-loop containing nucleoside triphosphate hydrolases superfamily protein	gene	protein_coding		3906			within	8.82348e-11	0.251657	5609	25.3388	5.66908e-10	92	0.25513					0
αT	5_206554560	5	206554560	Zm00001d017780	206546323	206552409	-		Ubiquitin-protein ligase	gene	protein_coding		8237			2151	2.78816e-11	0.929385	20667	93.3638	6.57569e-10	93	0.257903					0
αT	5_200659617	5	200659617	Zm00001d017583	200655864	200658911	-		Generic methyltransferase	gene	protein_coding		3753			706	9.6675e-11	0.303954	6768	30.5746	7.41982e-10	94	0.260677	NAM_JL_27	δT			0
αT	5_197247356	5	197247356	Zm00001d017480	197251323	197252009	+	AP2-EREBP-transcription factor 104	Ethylene-responsive transcription factor ERF035	gene	protein_coding		-3967			3967	6.19913e-10	0.0475729	1164	5.2584	7.44558e-10	95	0.26345	NAM_JL_27	δT			0
αT	5_198467111	5	198467111	Zm00001d017516	198490145	198492974	-		Actin-depolymerizing factor	gene	protein_coding		-23034			23034	2.54195e-10	0.132701	3056	13.8056	8.47094e-10	96	0.266223	NAM_JL_27	δT			0
αT	5_206697019	5	206697019	Zm00001d017783	206691760	206696301	+		AAA-type ATPase family protein	gene	protein_coding		5259			718	1.58312e-09	0.0213236	538	2.43043	8.47719e-10	97	0.268996					0
αT	5_197819279	5	197819279	Zm00001d017505	197812930	197823385	+		Homeodomain-like superfamily protein	gene	protein_coding		6349			within	1.16258e-10	0.295891	6577	29.7118	8.63189e-10	98	0.271769	NAM_JL_27	δT			0
αT	5_209502832	5	209502832	Zm00001d017881	209502895	209507334	-		ADP-ribosylation factor GTPase-activating protein AGD12	gene	protein_coding		-63			63	1.05475e-10	0.329833	7350	33.2038	8.72573e-10	99	0.274542	NAM_JL_29	δT, δT3, ΣTT3			0
αT	5_202963022	5	202963022	Zm00001d017644	202965181	202970447	+		RNA polymerase I specific transcription initiation factor RRN3 protein	gene	protein_coding		-2159			2159	8.94842e-11	0.435766	9703	43.8336	9.7359e-10	100	0.277316					0
αT	5_197902322	5	197902322	Zm00001d017508	197911900	197912280	-		Cortical cell-delineating protein	gene	protein_coding		-9578			9578	4.82367e-11	1			1.19409e-09	101	0.280089	NAM_JL_27	δT			0
αT	5_200706436	5	200706436	Zm00001d017584	200700839	200710960	+		Lysophospholipid acyltransferase 1	gene	protein_coding		5597			within	9.38048e-10	0.0519616	1245	5.62432	1.20611e-09	102	0.282862	NAM_JL_27	δT			0
αT	5_202961193	5	202961193	Zm00001d017643	202957210	202960229	-		Catalytic/ protein phosphatase type 2C	gene	protein_coding		3983			964	5.89504e-08	0.000853087	33	0.149078	1.24282e-09	103	0.285635					0
αT	5_197241299	5	197241299	Zm00001d017479	197231776	197232303	-			gene	protein_coding		9523			8996	5.97602e-11	1			1.46656e-09	104	0.288408	NAM_JL_27	δT			0
αT	5_197524565	5	197524565	Zm00001d017493	197521765	197523503	+		Expansin-B4	gene	protein_coding		2800			1062	6.56356e-08	0.00113711	41	0.185219	1.815e-09	105	0.291181	NAM_JL_27	δT			0
αT	5_198361764	5	198361764	Zm00001d017514	198262429	198288552	-		BEACH domain-containing protein C2	gene	protein_coding		99335			73212	4.22511e-10	0.208785	4690	21.1872	2.13048e-09	106	0.293955	NAM_JL_27	δT			0
αT	5_198238769	5	198238769	Zm00001d017513	198244236	198246356	+	GRAS-transcription factor 10	Scarecrow-like protein 6	gene	protein_coding		-5467			5467	1.31341e-10	0.690894	15328	69.2447	2.18899e-09	107	0.296728	NAM_JL_27	δT			0
αT	5_200834048	5	200834048	Zm00001d017590	200820486	200822192	+		Protein DETOXIFICATION 49	gene	protein_coding		13562			11856	9.14356e-11	1			2.20501e-09	108	0.299501	NAM_JL_27	δT			0
αT	5_200181390	5	200181390	Zm00001d017576	200174661	200175436	+		Remorin family protein	gene	protein_coding		6729			5954	9.16472e-11	1			2.20989e-09	109	0.302274	NAM_JL_27	δT			0
αT	5_208086598	5	208086598	Zm00001d017831	208057546	208063084	-	ARID-transcription factor 5	AT-rich interactive domain-containing protein 3	gene	protein_coding		29052			23514	1.788e-10	0.582043	12922	58.3755	2.4962e-09	110	0.305047	NAM_JL_29	δT, δT3, ΣTT3			0
αT	5_197609721	5	197609721	Zm00001d017497	197614187	197615137	+		Zinc finger protein ZAT9	gene	protein_coding		-4466			4466	1.33467e-10	0.801609	17768	80.2674	2.56326e-09	111	0.30782	NAM_JL_27	δT			0
αT	5_199518604	5	199518604	Zm00001d017557	199518262	199519560	+		Amino acid transporter ANTL2	gene	protein_coding		342			within	1.25366e-09	0.103482	2405	10.8647	3.08313e-09	112	0.310593	NAM_JL_27	δT			0
αT	5_203232763	5	203232763	Zm00001d017653	203227844	203228980	+		E3 ubiquitin-protein ligase ATL4	gene	protein_coding		4919			3783	1.62285e-10	0.826627	18351	82.9012	3.18363e-09	113	0.313367					0
αT	5_197834533	5	197834533	Zm00001d017506	197826688	197827496	-			gene	protein_coding		7845			7037	1.36199e-10	1			3.23022e-09	114	0.31614	NAM_JL_27	δT			0
αT	5_207119241	5	207119241	Zm00001d017800	207118180	207122586	-			gene	protein_coding		1061			within	3.14871e-10	0.438538	9775	44.1588	3.273e-09	115	0.318913					0
αT	5_199766912	5	199766912	Zm00001d017566	199762000	199766413	+		N6-adenosine-methyltransferase MT-A70-like protein	gene	protein_coding		4912			499	1.46895e-10	0.969674	21484	97.0546	3.37186e-09	116	0.321686	NAM_JL_27	δT			0
αT	5_204477713	5	204477713	Zm00001d017696	204473993	204475006	-		Peroxidase 64	gene	protein_coding		3720			2707	1.49775e-10	1			3.53797e-09	117	0.324459	NAM_JL_28	αT, γT, αT3, γT3	5_205828139	0.98	1350426	1353133
αT	5_207486515	5	207486515	Zm00001d017809	207482554	207491210	+		Heat shock 70 kDa protein 17	gene	protein_coding		3961			within	3.65876e-09	0.0431601	1061	4.7931	3.72183e-09	118	0.327232					0
αT	5_199138294	5	199138294	Zm00001d017544	199136710	199142020	+		Pseudouridine synthase family protein	gene	protein_coding		1584			within	6.72094e-10	0.262316	5807	26.2333	4.13581e-09	119	0.330006	NAM_JL_27	δT			0
αT	5_206199237	5	206199237	Zm00001d017766	206199093	206201012	-	nine-cis-epoxycarotenoid dioxygenase8	nine-cis-epoxycarotenoid dioxygenase8	gene	protein_coding		144			within	1.76708e-10	1			4.14496e-09	120	0.332779	NAM_JL_28	αT, γT, αT3, γT3	5_205828139	0.98	371098	370954
αT	5_207401353	5	207401353	Zm00001d017808	207409444	207425497	+		ATP-dependent DNA helicase homolog RECG chloroplastic	gene	protein_coding		-8091			8091	1.93598e-10	0.931296	20695	93.4902	4.22551e-09	121	0.335552					0
αT	5_197534183	5	197534183	Zm00001d017494	197532011	197533798	+		Expansin-B4	gene	protein_coding		2172			385	2.10619e-10	0.858786	19067	86.1357	4.23851e-09	122	0.338325	NAM_JL_27	δT			0
αT	5_25437397	5	25437397	Zm00001d013937	25431430	25434346	-	GRMZM2G073351	Protochlorophyllide reductase C chloroplastic	gene	protein_coding	Yes	5967			3051	6.42447e-07	0.000368542	18	0.0813155	5.4845e-09	123	0.341098	NAM_JL_24	αT, δT, γT, ΣT, δT3, γT3, ΣTT3	5_25549803	0.17	112406	115457
αT	5_209098463	5	209098463	Zm00001d017863	209096527	209100036	+		Protein-tyrosine-phosphatase IBR5	gene	protein_coding		1936			within	2.67063e-09	0.089141	2064	9.32418	5.51316e-09	124	0.343871	NAM_JL_29	δT, δT3, ΣTT3			0
αT	5_199881575	5	199881575	Zm00001d017570	199880025	199882270	-		Aluminum-activated malate transporter 10	gene	protein_coding		1550			within	2.47283e-10	1			5.71731e-09	125	0.346644	NAM_JL_27	δT			0
αT	5_209525282	5	209525282	Zm00001d017882	209528751	209533960	+		KH domain-containing protein	gene	protein_coding		-3469			3469	2.95535e-10	0.895341	19901	89.9033	6.09987e-09	126	0.349418	NAM_JL_29	δT, δT3, ΣTT3			0
αT	5_198508240	5	198508240	Zm00001d017517	198522508	198523693	-		AT5G44030 (E%3D6e-024) CESA4 IRX5 NWS2 | CESA4 (CELLULOSE SYNTHASE A4)%3B cellulose synthase/ transferase transferring glycosyl groups	gene	protein_coding		-14268			14268	2.72155e-10	1			6.26627e-09	127	0.352191	NAM_JL_27	δT			0
αT	5_202269325	5	202269325	Zm00001d017627	202366470	202367613	-		Eukaryotic translation initiation factor 2 subunit beta	gene	protein_coding		-97145			97145	2.77918e-10	1			6.39315e-09	128	0.354964					0
αT	5_201809636	5	201809636	Zm00001d001722	201808419	201808587	-			ncRNA_gene	lincRNA		1217			1049	3.07316e-10	1			7.0385e-09	129	0.357737	NAM_JL_27	δT			0
αT	5_207119241	5	207119241	Zm00001d017799	207115775	207118184	+		Exonuclease family protein	gene	protein_coding		3466			1057	3.14871e-10	1			7.20389e-09	130	0.36051					0
αT	5_198037526	5	198037526	Zm00001d017510	197996036	197996422	+		Cortical cell-delineating protein	gene	protein_coding		41490			41104	3.26975e-10	1			7.46849e-09	131	0.363283	NAM_JL_27	δT			0
αT	5_197965469	5	197965469	Zm00001d017509	197960872	197962982	-		Calpain-type cysteine protease DEK1	gene	protein_coding		4597			2487	3.27564e-10	1			7.48134e-09	132	0.366057	NAM_JL_27	δT			0
αT	5_201531848	5	201531848	Zm00001d017609	201463285	201477308	-	MYB-related-transcription factor 100	Protein REVEILLE 6	gene	protein_coding		68563			54540	4.62177e-09	0.0736934	1725	7.79274	7.76566e-09	133	0.36883	NAM_JL_27	δT			0
αT	5_199712115	5	199712115	Zm00001d017564	199688648	199695375	-			gene	protein_coding		23467			16740	7.36928e-10	0.467695	10440	47.163	7.85421e-09	134	0.371603	NAM_JL_27	δT			0
αT	5_197359771	5	197359771	Zm00001d017486	197360610	197361301	-		Zinc ion binding protein	gene	protein_coding		-839			839	7.28061e-10	0.485747	10840	48.97	8.05011e-09	135	0.374376	NAM_JL_27	δT			0
αT	5_198725597	5	198725597	Zm00001d017526	198707054	198710453	+	plasma membrane intrinsic protein1	Aquaporin PIP1-2	gene	protein_coding		18543			15144	1.44974e-07	0.00261299	79	0.356885	8.59681e-09	136	0.377149	NAM_JL_27	δT			0
αT	5_200802107	5	200802107	Zm00001d017589	200791661	200798918	+		late embryogenesis abundant protein	gene	protein_coding		10446			3189	4.22803e-10	1			9.54864e-09	137	0.379922	NAM_JL_27	δT			0
αT	5_199839098	5	199839098	Zm00001d017568	199836479	199842360	-		WNK6	gene	protein_coding		2619			within	5.88854e-09	0.0736553	1723	7.7837	9.78417e-09	138	0.382696	NAM_JL_27	δT			0
αT	5_208731512	5	208731512	Zm00001d017849	208733011	208737362	-			gene	protein_coding		-1499			1499	5.29201e-10	0.850012	18876	85.2729	1.01311e-08	139	0.385469	NAM_JL_29	δT, δT3, ΣTT3			0
αT	5_198669188	5	198669188	Zm00001d017523	198637922	198642027	-			gene	protein_coding		31266			27161	1.21391e-09	0.402608	8971	40.5267	1.09667e-08	140	0.388242	NAM_JL_27	δT			0
αT	5_199138294	5	199138294	Zm00001d017545	199141404	199144529	-		SEC14 cytosolic factor family protein / phosphoglyceride transfer family protein	gene	protein_coding		-3110			3110	6.72094e-10	0.739409	16407	74.1191	1.11429e-08	141	0.391015	NAM_JL_27	δT			0
αT	5_209711031	5	209711031	Zm00001d017895	209709534	209714278	+		Cellulose synthase-like protein E1	gene	protein_coding		1497			within	1.72556e-08	0.0338196	840	3.79472	1.29915e-08	142	0.393788	NAM_JL_29	δT, δT3, ΣTT3			0
αT	5_197000184	5	197000184	Zm00001d017474	197000100	197001338	-			gene	protein_coding		84			within	6.44903e-10	1			1.42923e-08	143	0.396561	NAM_JL_27	δT			0
αT	5_199946378	5	199946378	Zm00001d017571	199954355	199956369	-		Aluminum-activated malate transporter 10	gene	protein_coding		-7977			7977	6.68007e-10	1			1.47808e-08	144	0.399334	NAM_JL_27	δT			0
αT	5_204487321	5	204487321	Zm00001d017698	204485373	204490508	-		Oligopeptide transporter 4	gene	protein_coding		1948			within	4.16117e-09	0.198014	4467	20.1798	1.80589e-08	145	0.402108	NAM_JL_28	αT, γT, αT3, γT3	5_205828139	0.98	1340818	1337631
αT	5_207746391	5	207746391	Zm00001d017821	207742585	207746674	-		Probable L-type lectin-domain containing receptor kinase S.5	gene	protein_coding		3806			within	1.11893e-08	0.0757533	1762	7.95988	1.85533e-08	146	0.404881	NAM_JL_29	δT, δT3, ΣTT3			0
αT	5_198595727	5	198595727	Zm00001d017522	198558661	198606647	+		Tripeptidyl-peptidase 2	gene	protein_coding		37066			within	1.47494e-09	0.641507	14238	64.3206	2.06066e-08	147	0.407654	NAM_JL_27	δT			0
αT	1_17985102	1	17985102	Zm00001d027937	17977813	17985594	+		Pentatricopeptide repeat-containing protein	gene	protein_coding		7289			within	0.00269261	3.74855e-07	3	0.0135526	2.19167e-08	148	0.410427	NAM_JL_2	γT, δT3			0
αT	5_202982267	5	202982267	Zm00001d017646	202983357	202984353	-			gene	protein_coding		-1090			1090	1.82127e-09	0.558554	12371	55.8863	2.20812e-08	149	0.4132					0
αT	5_200840772	5	200840772	Zm00001d001719	200856065	200856515	+			ncRNA_gene	lincRNA		-15293			15293	1.23845e-09	1			2.66384e-08	150	0.415973	NAM_JL_27	δT			0
αT	5_201765952	5	201765952	Zm00001d017615	201775528	201775992	-		RING/U-box superfamily protein	gene	protein_coding		-9576			9576	1.35248e-09	1			2.89719e-08	151	0.418747	NAM_JL_27	δT			0
αT	5_199685374	5	199685374	Zm00001d017563	199683772	199686910	+	G2-like-transcription factor 20	Putative Myb family transcription factor	gene	protein_coding		1602			within	1.44927e-09	1			3.09452e-08	152	0.42152	NAM_JL_27	δT			0
αT	5_207843497	5	207843497	Zm00001d017825	207839207	207840181	-		AT-hook motif nuclear-localized protein 29	gene	protein_coding		4290			3316	1.51401e-09	1			3.22613e-08	153	0.424293	NAM_JL_29	δT, δT3, ΣTT3			0
αT	5_202835494	5	202835494	Zm00001d017639	202840915	202841791	-		Chitinase 1	gene	protein_coding		-5421			5421	1.54247e-09	1			3.28389e-08	154	0.427066					0
αT	5_208274372	5	208274372	Zm00001d017837	208273343	208273918	+			gene	protein_coding		1029			454	9.38376e-08	0.0208118	519	2.3446	4.11169e-08	155	0.429839	NAM_JL_29	δT, δT3, ΣTT3			0
αT	5_207565113	5	207565113	Zm00001d017814	207564435	207564833	-			gene	protein_coding		678			280	2.0132e-09	1			4.23246e-08	156	0.432612					0
αT	5_201594829	5	201594829	Zm00001d017612	201595446	201596045	-		brassinosteroid-responsive RING-H2	gene	protein_coding		-617			617	2.20398e-09	1			4.6136e-08	157	0.435385	NAM_JL_27	δT			0
αT	5_207729467	5	207729467	Zm00001d017820	207733647	207736615	-		Galactan beta-14-galactosyltransferase GALS1	gene	protein_coding		-4180			4180	3.19726e-09	0.692482	15365	69.4118	4.63365e-08	158	0.438159	NAM_JL_29	δT, δT3, ΣTT3			0
αT	5_210213636	5	210213636	Zm00001d017928	210212564	210215163	+		Aluminum-activated malate transporter 9	gene	protein_coding		1072			within	2.44688e-09	1			5.09647e-08	159	0.440932	NAM_JL_29	δT, δT3, ΣTT3			0
αT	5_210667226	5	210667226	Zm00001d017947	210665706	210667821	-		Microtubule motor	gene	protein_coding		1520			within	1.03645e-07	0.0243894	618	2.79183	5.25685e-08	160	0.443705	NAM_JL_29	δT, δT3, ΣTT3			0
αT	5_208372382	5	208372382	Zm00001d017838	208358406	208359206	+			gene	protein_coding		13976			13176	2.81846e-09	1			5.83057e-08	161	0.446478	NAM_JL_29	δT, δT3, ΣTT3			0
αT	5_197791969	5	197791969	Zm00001d017504	197789156	197790037	-		zinc finger (C2H2 type) family protein	gene	protein_coding		2813			1932	9.17642e-09	0.320755	7140	32.2551	6.07623e-08	162	0.449251	NAM_JL_27	δT			0
αT	5_207376425	5	207376425	Zm00001d017807	207375638	207378185	+			gene	protein_coding		787			within	4.17589e-09	0.753856	16725	75.5557	6.47752e-08	163	0.452024					0
αT	5_199649671	5	199649671	Zm00001d017561	199651668	199654468	+			gene	protein_coding		-1997			1997	3.23113e-09	1			6.64011e-08	164	0.454798	NAM_JL_27	δT			0
αT	5_206957869	5	206957869	Zm00001d017791	206956208	206962117	+		Phosphoribulokinase / Uridine kinase family	gene	protein_coding		1661			within	5.63797e-09	0.583257	12957	58.5336	6.75199e-08	165	0.457571					0
αT	5_202101711	5	202101711	Zm00001d017625	202094893	202104444	+			gene	protein_coding		6818			within	1.47245e-07	0.0225431	572	2.58403	6.8125e-08	166	0.460344					0
αT	5_204125711	5	204125711	Zm00001d017682	204120837	204122561	-	PLATZ-transcription factor 11	PLATZ transcription factor family protein	gene	protein_coding		4874			3150	5.56202e-09	0.640929	14227	64.2709	7.29089e-08	167	0.463117	NAM_JL_28	αT, γT, αT3, γT3	5_205828139	0.98	1702428	1705578
αT	5_208429180	5	208429180	Zm00001d017840	208461206	208462369	-		Delta(12)-fatty-acid desaturase	gene	protein_coding		-32026			32026	1.76153e-08	0.212639	4780	21.5938	7.64224e-08	168	0.46589	NAM_JL_29	δT, δT3, ΣTT3			0
αT	5_201025427	5	201025427	Zm00001d017592	201022603	201023298	+	AP2-EREBP-transcription factor 16	Dehydration-responsive element-binding protein 1A	gene	protein_coding		2824			2129	4.13964e-09	1			8.40457e-08	169	0.468663	NAM_JL_27	δT			0
αT	5_208025101	5	208025101	Zm00001d017830	208016509	208023474	-		Pyrophosphate--fructose 6-phosphate 1-phosphotransferase subunit alpha 2	gene	protein_coding		8592			1627	3.4302e-05	0.000133387	9	0.0406578	9.24354e-08	170	0.471436	NAM_JL_29	δT, δT3, ΣTT3			0
αT	5_206954108	5	206954108	Zm00001d017790	206950056	206955130	+		Carbamoyl-phosphate synthase small chain chloroplastic	gene	protein_coding		4052			within	7.37936e-09	0.699509	15508	70.0578	1.03662e-07	171	0.47421					0
αT	5_210504571	5	210504571	Zm00001d017942	210507670	210509638	-			gene	protein_coding		-3099			3099	5.31857e-09	1			1.06648e-07	172	0.476983	NAM_JL_29	δT, δT3, ΣTT3			0
αT	5_204227525	5	204227525	Zm00001d017685	204191566	204196931	-		Chaperone DnaJ-domain superfamily protein	gene	protein_coding		35959			30594	3.32217e-08	0.16471	3758	16.9769	1.09569e-07	173	0.479756	NAM_JL_28	αT, γT, αT3, γT3	5_205828139	0.98	1600614	1631208
αT	5_200884322	5	200884322	Zm00001d001720	200882727	200883014	-			ncRNA_gene	lincRNA		1595			1308	5.47951e-09	1			1.09712e-07	174	0.482529	NAM_JL_27	δT			0
αT	5_197227619	5	197227619	Zm00001d017478	197222832	197223605	+	AP2-EREBP-transcription factor 66	Ethylene-responsive transcription factor ERF035	gene	protein_coding		4787			4014	5.54514e-09	1			1.1096e-07	175	0.485302	NAM_JL_27	δT			0
αT	5_201534096	5	201534096	Zm00001d017611	201589286	201591205	-		fringe-related protein	gene	protein_coding		-55190			55190	1.07716e-08	0.516188	11493	51.9199	1.11246e-07	176	0.488075	NAM_JL_27	δT			0
αT	5_199839098	5	199839098	Zm00001d017569	199839198	199839269	-			ncRNA_gene	tRNA		-100			100	5.88854e-09	1			1.17478e-07	177	0.490849	NAM_JL_27	δT			0
αT	5_201912689	5	201912689	Zm00001d017618	201875376	201876644	-	ABI3-VP1-transcription factor 16	B3 domain-containing transcription factor NGA2	gene	protein_coding		37313			36045	5.96691e-09	1			1.18962e-07	178	0.493622					0
αT	5_203379856	5	203379856	Zm00001d017661	203349881	203350636	+			gene	protein_coding		29975			29220	6.19359e-09	1			1.23251e-07	179	0.496395					0
αT	5_208744200	5	208744200	Zm00001d017850	208742451	208744562	-		60S ribosomal protein L31	gene	protein_coding		1749			within	2.31931e-07	0.0276011	695	3.13968	1.27178e-07	180	0.499168	NAM_JL_29	δT, δT3, ΣTT3			0
αT3	5_205828155	5	205828155	Zm00001d017746	205825586	205829216	+	vitamin E synthesis4	vitamin E synthesis4	gene	protein_coding	Yes	2569	αT3_31	5_205828155	within	3.30254e-34	4.09946e-07	1	0.00451753	1.25639e-38	1	0.00281627	NAM_JL_28	αT, γT, αT3, γT3	5_205823498	0.88	4657	2088
αT3	5_205853870	5	205853870	Zm00001d017748	205851491	205853476	+		3-dehydrosphinganine reductase TSC10B	gene	protein_coding		2379	αT3_31	5_205828155	394	1.33712e-32	0.368285	8315	37.5632	3.71256e-31	2	0.00563253	NAM_JL_28	αT, γT, αT3, γT3	5_205823498	0.88	30372	27993
αT3	5_205890727	5	205890727	Zm00001d017751	205889941	205895577	+	organelle transcript processing51	Pentatricopeptide repeat-containing protein chloroplastic	gene	protein_coding		786	αT3_31	5_205828155	within	3.28044e-31	0.552299	12385	55.9496	1.3006e-29	3	0.0084488	NAM_JL_28	αT, γT, αT3, γT3	5_205823498	0.88	67229	66443
αT3	5_205890727	5	205890727	Zm00001d017752	205893484	205894854	-		Transcription factor GT-3b	gene	protein_coding		-2757	αT3_31	5_205828155	2757	3.28044e-31	0.760795	17002	76.807	1.7836e-29	4	0.0112651	NAM_JL_28	αT, γT, αT3, γT3	5_205823498	0.88	67229	69986
αT3	5_205847970	5	205847970	Zm00001d017747	205846897	205847565	+		General transcription factor 2-related zinc finger protein	gene	protein_coding		1073	αT3_31	5_205828155	405	7.08474e-29	1			4.66297e-27	5	0.0140813	NAM_JL_28	αT, γT, αT3, γT3	5_205823498	0.88	24472	23399
αT3	5_205746414	5	205746414	Zm00001d017743	205749775	205753794	+		Cell division control protein 48 homolog D	gene	protein_coding		-3361	αT3_31	5_205828155	3361	9.93103e-25	1			5.58809e-23	6	0.0168976	NAM_JL_28	αT, γT, αT3, γT3	5_205823498	0.88	77084	69704
αT3	5_205896864	5	205896864	Zm00001d017753	205897970	205901088	+		Carboxylic ester hydrolase	gene	protein_coding		-1106	αT3_31	5_205828155	1106	6.32403e-19	0.617932	13828	62.4684	1.69545e-17	7	0.0197139	NAM_JL_28	αT, γT, αT3, γT3	5_205823498	0.88	73366	74472
αT3	5_205737388	5	205737388	Zm00001d017742	205734245	205737675	-	GRF-transcription factor 6	Growth-regulating factor 6	gene	protein_coding		3143	αT3_31	5_205828155	within	2.32634e-16	0.0205793	536	2.4214	1.95714e-16	8	0.0225301	NAM_JL_28	αT, γT, αT3, γT3	5_205823498	0.88	86110	85823
αT3	5_206008171	5	206008171	Zm00001d017756	206004272	206007539	-		Syntaxin-22	gene	protein_coding		3899	αT3_31	5_205828155	632	1.63439e-14	0.00456451	114	0.514998	2.84491e-15	9	0.0253464	NAM_JL_28	αT, γT, αT3, γT3	5_205823498	0.88	184673	180774
αT3	5_206062665	5	206062665	Zm00001d017761	206061161	206062765	+			gene	protein_coding		1504	αT3_31	5_205828155	within	3.2118e-14	0.00268503	74	0.334297	3.27612e-15	10	0.0281627	NAM_JL_28	αT, γT, αT3, γT3	5_205823498	0.88	239167	237663
αT3	5_205877731	5	205877731	Zm00001d017749	205881374	205882818	+			gene	protein_coding		-3643	αT3_31	5_205828155	3643	3.02967e-15	1			1.04312e-13	11	0.0309789	NAM_JL_28	αT, γT, αT3, γT3	5_205823498	0.88	54233	57876
αT3	5_205640143	5	205640143	Zm00001d017740	205615626	205616553	-		Expansin-B4	gene	protein_coding		24517	αT3_31	5_205828155	23590	9.98444e-15	1			3.3186e-13	12	0.0337952	NAM_JL_28	αT, γT, αT3, γT3	5_205823498	0.88	183355	206945
αT3	5_205953999	5	205953999	Zm00001d017755	205944885	205951175	-		Rop guanine nucleotide exchange factor 14	gene	protein_coding		9114	αT3_31	5_205828155	2824	9.77032e-12	0.0116096	302	1.36429	3.4945e-12	13	0.0366115	NAM_JL_28	αT, γT, αT3, γT3	5_205823498	0.88	130501	121387
αT3	5_205472611	5	205472611	Zm00001d017730	205467077	205473131	-		Protein BREVIS RADIX	gene	protein_coding		5534	αT3_31	5_205828155	within	1.8638e-12	0.737581	16459	74.354	3.89217e-11	14	0.0394277	NAM_JL_28	αT, γT, αT3, γT3	5_205823498	0.88	350887	350367
αT3	5_205305329	5	205305329	Zm00001d017727	205304084	205306760	-	alternative oxidase1	alternative oxidase1	gene	protein_coding		1245	αT3_31	5_205828155	within	3.35489e-10	0.125018	2927	13.2228	1.04413e-09	15	0.042244	NAM_JL_28	αT, γT, αT3, γT3	5_205823498	0.88	518169	516738
αT3	5_205580456	5	205580456	Zm00001d017737	205579980	205580792	-		Expansin-B4	gene	protein_coding		476	αT3_31	5_205828155	within	6.65713e-11	1			1.62652e-09	16	0.0450603	NAM_JL_28	αT, γT, αT3, γT3	5_205823498	0.88	243042	242706
αT3	5_206861409	5	206861409	Zm00001d017788	206876258	206880405	-	C2C2-Dof-transcription factor 29	Dof zinc finger protein DOF2.1	gene	protein_coding		-14849	αT3_31	5_205828155	14849	9.02434e-10	0.322628	7331	33.118	6.68399e-09	17	0.0478765					0
αT3	5_205526094	5	205526094	Zm00001d017731	205527426	205528156	-		Expansin-B4	gene	protein_coding		-1332	αT3_31	5_205828155	1332	4.20074e-10	1			9.48972e-09	18	0.0506928	NAM_JL_28	αT, γT, αT3, γT3	5_205823498	0.88	297404	295342
αT3	5_205554657	5	205554657	Zm00001d017735	205560304	205561065	-		Expansin-B4	gene	protein_coding		-5647	αT3_31	5_205828155	5647	4.20074e-10	1			9.48972e-09	19	0.0535091	NAM_JL_28	αT, γT, αT3, γT3	5_205823498	0.88	268841	262433
αT3	5_209094123	5	209094123	Zm00001d017862	209091060	209095479	+	PHD-transcription factor 22	RING/FYVE/PHD zinc finger superfamily protein	gene	protein_coding		3063	αT3_31	5_205828155	within	1.30931e-06	0.000341899	8	0.0361402	1.00843e-08	20	0.0563253	NAM_JL_29	δT, δT3, ΣTT3			0
αT3	5_205124171	5	205124171	Zm00001d017719	205105870	205106370	+		60S ribosomal protein L12-3	gene	protein_coding		18301	αT3_31	5_205828155	17801	6.0351e-09	0.081572	1936	8.74593	1.10431e-08	21	0.0591416	NAM_JL_28	αT, γT, αT3, γT3	5_205823498	0.88	699327	717128
αT3	5_206101752	5	206101752	Zm00001d001728	206105920	206106223	+			ncRNA_gene	lincRNA		-4168	αT3_31	5_205828155	4168	1.4504e-09	1			3.09681e-08	22	0.0619579	NAM_JL_28	αT, γT, αT3, γT3	5_205823498	0.88	278254	282422
αT3	5_205301910	5	205301910	Zm00001d017726	205300454	205303606	+	G2-like-transcription factor 11	Homeodomain-like superfamily protein	gene	protein_coding		1456	αT3_31	5_205828155	within	4.21553e-09	0.401617	9095	41.0869	3.58867e-08	23	0.0647741	NAM_JL_28	αT, γT, αT3, γT3	5_205823498	0.88	521588	519892
αT3	5_206554560	5	206554560	Zm00001d017780	206546323	206552409	-		Ubiquitin-protein ligase	gene	protein_coding		8237	αT3_31	5_205828155	2151	2.3743e-08	0.270106	6162	27.837	1.27396e-07	24	0.0675904					0
αT3	10_147246248	10	147246248	Zm00001d026501	147240629	147249381	-	glutamine synthetase1	Glutamine synthetase leaf isozyme chloroplastic	gene	protein_coding		5619	αT3_49	10_147246248	within	7.72933e-07	0.00917563	245	1.10679	1.40171e-07	25	0.0704067					0
αT3	5_205087195	5	205087195	Zm00001d017718	205088109	205091684	+			gene	protein_coding		-914	αT3_31	5_205828155	914	5.86419e-08	0.207967	4804	21.7022	2.34426e-07	26	0.0732229	NAM_JL_28	αT, γT, αT3, γT3	5_205823498	0.88	736303	731814
αT3	5_205086810	5	205086810	Zm00001d017717	205082975	205085670	+		ADP-ribosylation factor B1B	gene	protein_coding		3835	αT3_31	5_205828155	1140	5.29845e-08	0.282822	6450	29.1381	2.84961e-07	27	0.0760392	NAM_JL_28	αT, γT, αT3, γT3	5_205823498	0.88	736688	737828
αT3	5_205939734	5	205939734	Zm00001d017754	205924278	205940214	-		yeast YAK1-related gene 1	gene	protein_coding		15456	αT3_31	5_205828155	within	5.87096e-07	0.0324394	797	3.60047	3.57598e-07	28	0.0788555	NAM_JL_28	αT, γT, αT3, γT3	5_205823498	0.88	116236	100780
αT3	9_155782694	9	155782694	Zm00001d048409	155778427	155783053	-		Cell division control protein 48 homolog D	gene	protein_coding		4267			within	2.09089e-05	0.00146024	46	0.207806	5.58873e-07	29	0.0816717					0
αT3	5_205069172	5	205069172	Zm00001d017715	205061679	205067355	-		Expressed protein%3B protein	gene	protein_coding		7493	αT3_31	5_205828155	1817	3.17107e-08	1			5.79246e-07	30	0.084488	NAM_JL_28	αT, γT, αT3, γT3	5_205823498	0.88	754326	756143
αT3	5_207743659	5	207743659	Zm00001d017821	207742585	207746674	-		Probable L-type lectin-domain containing receptor kinase S.5	gene	protein_coding		1074	αT3_31	5_205828155	within	3.62693e-05	0.000901439	24	0.108421	5.9622e-07	31	0.0873043	NAM_JL_29	δT, δT3, ΣTT3			0
αT3	5_205576206	5	205576206	Zm00001d017736	205576400	205576981	-		Expansin-B4	gene	protein_coding		-194	αT3_31	5_205828155	194	5.26786e-08	1			9.35522e-07	32	0.0901205	NAM_JL_28	αT, γT, αT3, γT3	5_205823498	0.88	247292	246517
αT3	5_207563853	5	207563853	Zm00001d017814	207564435	207564833	-			gene	protein_coding		-582	αT3_31	5_205828155	582	5.7273e-08	1			1.01233e-06	33	0.0929368					0
αT3	9_15322908	9	15322908	Zm00001d045179	15312594	15322747	+		Fanconi-associated nuclease 1 homolog	gene	protein_coding		10314	αT3_45	9_95963939	161	1.23982e-05	0.00468617	118	0.533068	1.02611e-06	34	0.0957531					0
αT3	2_213393743	2	213393743	Zm00001d006649	213393425	213394974	-		cytochrome P450 family 87 subfamily A polypeptide 6	gene	protein_coding		318	αT3_15	2_213352901	within	1.36367e-06	0.0503302	1199	5.41652	1.20071e-06	35	0.0985693					0
αT3	5_205057022	5	205057022	Zm00001d017714	205056209	205061640	+		Protein NRT1/ PTR FAMILY 8.3	gene	protein_coding		813	αT3_31	5_205828155	within	1.50302e-07	0.53854	12069	54.522	1.40272e-06	36	0.101386	NAM_JL_28	αT, γT, αT3, γT3	5_205823498	0.88	766476	761858
αT3	1_39104096	1	39104096	Zm00001d028558	39099230	39105322	+		Clathrin binding protein	gene	protein_coding		4866	αT3_4	1_39104096	within	7.77963e-07	0.144614	3391	15.3189	1.9126e-06	37	0.104202	NAM_JL_3	αT, δT, γT, ΣT, αT3, ΣTT3	1_37504706	0.39	1599390	1594524
αT3	5_207631844	5	207631844	Zm00001d017817	207626509	207626934	-			gene	protein_coding		5335	αT3_31	5_205828155	4910	1.58667e-07	0.752412	16827	76.0164	2.02246e-06	38	0.107018					0
αT3	5_208265069	5	208265069	Zm00001d017834	208264486	208266307	+		Cysteine protease XCP1	gene	protein_coding		583	αT3_31	5_205828155	within	1.97443e-07	0.682121	15221	68.7613	2.26537e-06	39	0.109834	NAM_JL_29	δT, δT3, ΣTT3			0
αT3	2_213352901	2	213352901	Zm00001d006647	213345740	213349165	+			gene	protein_coding		7161	αT3_15	2_213352901	3736	7.14391e-07	0.195221	4524	20.4373	2.34097e-06	40	0.112651					0
αT3	9_95392601	9	95392601	Zm00001d046549	95423390	95429102	-		110 kDa U5 small nuclear ribonucleoprotein component CLO	gene	protein_coding		-30789	αT3_45	9_95963939	30789	3.18853e-05	0.00516684	134	0.605349	2.7379e-06	41	0.115467	NAM_JL_45	αT, δT, γT, ΣT, αT3, δT3, γT3, ΣT3, ΣTT3	9_92908442	0.79	2484159	2514948
αT3	2_219183148	2	219183148	Zm00001d006907	219180628	219186031	-		Transcription elongation factor SPT4	gene	protein_coding		2520	αT3_16	2_219218966	within	8.05593e-07	0.221201	5107	23.071	2.94747e-06	42	0.118283	NAM_JL_12	αT, δT, γT, ΣT, ΣTT3			0
αT3	3_1529848	3	1529848	Zm00001d039315	1533825	1541740	+		P-loop containing nucleoside triphosphate hydrolases superfamily protein	gene	protein_coding		-3977			3977	0.000770223	0.000255209	4	0.0180701	3.23202e-06	43	0.121099					0
αT3	5_207118229	5	207118229	Zm00001d017800	207118180	207122586	-			gene	protein_coding		49	αT3_31	5_205828155	within	7.38918e-06	0.0287094	700	3.16227	3.47187e-06	44	0.123916					0
αT3	5_210499709	5	210499709	Zm00001d017941	210498173	210500108	+		3-ketoacyl-CoA synthase 5	gene	protein_coding		1536	αT3_32	5_210499709	within	2.38515e-07	0.970325	21525	97.2398	3.76755e-06	45	0.126732	NAM_JL_29	δT, δT3, ΣTT3			0
αT3	5_207837495	5	207837495	Zm00001d017825	207839207	207840181	-		AT-hook motif nuclear-localized protein 29	gene	protein_coding		-1712	αT3_31	5_205828155	1712	2.33319e-07	1			3.7963e-06	46	0.129548	NAM_JL_29	δT, δT3, ΣTT3			0
αT3	5_207759012	5	207759012	Zm00001d017823	207755678	207763540	-		Thioredoxin reductase	gene	protein_coding		3334	αT3_31	5_205828155	within	3.16005e-07	0.849567	18943	85.5755	4.33052e-06	47	0.132365	NAM_JL_29	δT, δT3, ΣTT3			0
αT3	7_164880792	7	164880792	Zm00001d021864	164880127	164883291	-		splicing factor Prp18 family protein	gene	protein_coding		665			within	0.000349635	0.000826493	22	0.0993856	4.63999e-06	48	0.135181					0
αT3	5_207759012	5	207759012	Zm00001d017824	207760602	207760673	-			ncRNA_gene	tRNA		-1590	αT3_31	5_205828155	1590	3.16005e-07	1			5.04581e-06	49	0.137997	NAM_JL_29	δT, δT3, ΣTT3			0
αT3	5_206803706	5	206803706	Zm00001d017787	206752152	206757266	-		Monodehydroascorbate reductase 4 peroxisomal	gene	protein_coding		51554	αT3_31	5_205828155	46440	3.26042e-07	0.987374	21854	98.7261	5.13437e-06	50	0.140813					0
αT3	5_206428308	5	206428308	Zm00001d017778	206414473	206416485	-	bHLH-transcription factor 29	Transcription factor bHLH63	gene	protein_coding		13835	αT3_31	5_205828155	11823	1.85849e-06	0.202224	4680	21.142	5.93593e-06	51	0.14363	NAM_JL_28	αT, γT, αT3, γT3	5_205823498	0.88	604810	590975
αT3	5_206949499	5	206949499	Zm00001d017790	206950056	206955130	+		Carbamoyl-phosphate synthase small chain chloroplastic	gene	protein_coding		-557	αT3_31	5_205828155	557	4.39261e-07	0.872151	19416	87.7123	6.04342e-06	52	0.146446					0
αT3	7_605934	7	605934	Zm00001d018604	627882	630942	+			gene	protein_coding		-21948			21948	0.000209102	0.00190994	62	0.280087	6.28347e-06	53	0.149262					0
αT3	5_207738340	5	207738340	Zm00001d017820	207733647	207736615	-		Galactan beta-14-galactosyltransferase GALS1	gene	protein_coding		4693	αT3_31	5_205828155	1725	7.82137e-07	0.522555	11703	52.8686	6.42094e-06	54	0.152078	NAM_JL_29	δT, δT3, ΣTT3			0
αT3	5_205190487	5	205190487	Zm00001d017721	205190183	205198427	-		Tudor/PWWP/MBT superfamily protein	gene	protein_coding		304	αT3_31	5_205828155	within	2.04374e-06	0.201231	4658	21.0426	6.45853e-06	55	0.154895	NAM_JL_28	αT, γT, αT3, γT3	5_205823498	0.88	633011	625071
αT3	5_205299171	5	205299171	Zm00001d001727	205298996	205299324	+			ncRNA_gene	lincRNA		175	αT3_31	5_205828155	within	4.15782e-07	1			6.52491e-06	56	0.157711	NAM_JL_28	αT, γT, αT3, γT3	5_205823498	0.88	524327	524174
αT3	8_173260007	8	173260007	Zm00001d012381	173254406	173259963	-			gene	protein_coding		5601			44	0.000451218	0.000968238	27	0.121973	6.83447e-06	57	0.160527					0
αT3	5_207247445	5	207247445	Zm00001d017804	207299284	207300818	+	bHLH-transcription factor 89	Transcription factor bHLH83	gene	protein_coding		-51839	αT3_31	5_205828155	51839	4.65526e-07	1			7.25295e-06	58	0.163343					0
αT3	6_151393862	6	151393862	Zm00001d038200	151393535	151403991	-		Guanosine nucleotide diphosphate dissociation inhibitor 2	gene	protein_coding		327	αT3_35	6_151393862	within	1.22868e-06	0.38761	8778	39.6549	7.40915e-06	59	0.16616					0
αT3	1_234153462	1	234153462	Zm00001d032681	234066734	234078059	-	Homeobox-transcription factor 69	Homeobox-leucine zipper protein REVOLUTA	gene	protein_coding		86728			75403	2.67561e-06	0.180796	4181	18.8878	7.51815e-06	60	0.168976	NAM_JL_5	αT, δT, γT, ΣT, δT3, γT3, ΣTT3			0
αT3	9_96272447	9	96272447	Zm00001d046568	96269799	96278036	+	knotted related homeobox2	knotted related homeobox2	gene	protein_coding		2648	αT3_45	9_95963939	within	1.1408e-05	0.043193	1052	4.75244	7.64905e-06	61	0.171792	NAM_JL_45	αT, δT, γT, ΣT, αT3, δT3, γT3, ΣT3, ΣTT3	9_92908442	0.79	3364005	3361357
αT3	2_219218966	2	219218966	Zm00001d006910	219224627	219227525	-			gene	protein_coding		-5661	αT3_16	2_219218966	5661	6.30763e-07	0.919109	20436	92.3202	8.90521e-06	62	0.174609	NAM_JL_12	αT, δT, γT, ΣT, ΣTT3			0
αT3	3_82800001	3	82800001	Zm00001d040958	83071425	83074361	+		glucose-inhibited division family A protein	gene	protein_coding		-271424			271424	0.00146854	0.000409801	9	0.0406578	9.22174e-06	63	0.177425	NAM_JL_14	αT3, δT3, γT3, ΣT3	3_146261139	0.08	63461138	63186778
αT3	5_205028983	5	205028983	Zm00001d017713	205042879	205045991	+		Protein NRT1/ PTR FAMILY 8.3	gene	protein_coding		-13896	αT3_31	5_205828155	13896	1.02102e-06	0.631817	14143	63.8914	9.84028e-06	64	0.180241	NAM_JL_28	αT, γT, αT3, γT3	5_205823498	0.88	794515	777507
αT3	5_206968082	5	206968082	Zm00001d017793	206964939	206969131	-		Kinesin light chain	gene	protein_coding		3143	αT3_31	5_205828155	within	9.63281e-07	0.669947	14955	67.5596	9.84379e-06	65	0.183057					0
αT3	5_27253774	5	27253774	Zm00001d013982	27225663	27235776	-			gene	protein_coding		28111	αT3_28	5_26760778	17998	8.24402e-05	0.00786526	204	0.921576	9.88749e-06	66	0.185874	NAM_JL_24	αT, δT, γT, ΣT, δT3, γT3, ΣTT3			0
αT3	4_74612152	4	74612152	Zm00001d050224	74614191	74625017	+		4-coumarate--CoA ligase 1	gene	protein_coding		-2039			2039	0.000571025	0.00123449	37	0.167149	1.06903e-05	67	0.18869	NAM_JL_21	δT, γT, ΣT, αT3, δT3, γT3, ΣT3, ΣTT3	4_84987490	0.32	10375338	10362473
αT3	2_4665588	2	4665588	Zm00001d002028	4663113	4666196	+		Protein FATTY ACID EXPORT 2 chloroplastic	gene	protein_coding		2475			within	9.75934e-05	0.00739362	188	0.849295	1.09259e-05	68	0.191506					0
αT3	1_249339052	1	249339052	Zm00001d033066	249337697	249342245	-		Potassium transporter 5	gene	protein_coding		1355	αT3_10	1_249339052	within	7.28509e-07	1			1.1024e-05	69	0.194322					0
αT3	2_219194931	2	219194931	Zm00001d006909	219192197	219193799	-		Thioesterase superfamily protein	gene	protein_coding		2734	αT3_16	2_219218966	1132	7.36036e-07	1			1.11303e-05	70	0.197139	NAM_JL_12	αT, δT, γT, ΣT, ΣTT3			0
αT3	3_10933053	3	10933053	Zm00001d039658	10933798	10935205	+	bZIP-transcription factor 6	Transcription factor HY5-like	gene	protein_coding		-745			745	4.69076e-05	0.0173431	446	2.01482	1.22207e-05	71	0.199955					0
αT3	3_57535928	3	57535928	Zm00001d040678	57611250	57618983	+			gene	protein_coding		-75322			75322	0.00020553	0.00403322	102	0.460788	1.24368e-05	72	0.202771	NAM_JL_14	αT3, δT3, γT3, ΣT3	3_146261139	0.08	88725211	88642156
αT3	7_141012493	7	141012493	Zm00001d021036	141009143	141013714	-		Calcium-dependent protein kinase 14	gene	protein_coding		3350			within	9.59525e-05	0.00873444	237	1.07065	1.25648e-05	73	0.205587	NAM_JL_38	αT			0
αT3	5_26760778	5	26760778	Zm00001d013971	26721609	26722766	-		E3 ubiquitin-protein ligase RING1-like	gene	protein_coding		39169	αT3_28	5_26760778	38012	2.65054e-06	0.322563	7329	33.109	1.28007e-05	74	0.208404	NAM_JL_24	αT, δT, γT, ΣT, δT3, γT3, ΣTT3			0
αT3	3_17170380	3	17170380	Zm00001d039866	17168377	17172935	+		Triosephosphate isomerase	gene	protein_coding		2003	αT3_19	3_17363398	within	8.65899e-06	0.0999489	2349	10.6117	1.29472e-05	75	0.21122					0
αT3	5_222288533	5	222288533	Zm00001d018515	222298217	222302462	-		AT-hook motif nuclear-localized protein 9	gene	protein_coding		-9684			9684	1.38581e-05	0.0631031	1489	6.7266	1.30733e-05	76	0.214036					0
αT3	5_215694914	5	215694914	Zm00001d018157	215693591	215695288	-	light harvesting complex a/b protein4	light harvesting complex a/b protein4	gene	protein_coding		1323	αT3_32	5_210499709	within	1.40431e-06	0.625168	13986	63.1821	1.31213e-05	77	0.216853					0
αT3	5_206900515	5	206900515	Zm00001d017789	206898283	206898994	+			gene	protein_coding		2232	αT3_31	5_205828155	1521	1.03532e-06	0.860446	19182	86.6552	1.33012e-05	78	0.219669					0
αT3	2_139032723	2	139032723	Zm00001d004784	139072783	139074023	+		Protein TPLATE	gene	protein_coding		-40060			40060	0.000658872	0.00135836	42	0.189736	1.3359e-05	79	0.222485	NAM_JL_10	δT, γT, αT3, γT3, ΣT3	2_42787017	0.09	96245706	96285766
αT3	2_12492581	2	12492581	Zm00001d002429	12492416	12496032	+	GRF-transcription factor 8	Putative growth-regulating factor 6	gene	protein_coding		165			within	0.00308292	0.000295757	7	0.0316227	1.35929e-05	80	0.225301					0
αT3	1_241524802	1	241524802	Zm00001d032889	241520053	241523219	-		F-box domain containing protein	gene	protein_coding		4749	αT3_9	1_241524802	1583	2.60937e-05	0.0349682	863	3.89863	1.3602e-05	81	0.228118					0
αT3	1_190658162	1	190658162	Zm00001d031454	190649919	190653721	-	MYB-related-transcription factor 103	DNA-binding bromodomain-containing protein	gene	protein_coding		8243			4441	0.000303186	0.00311031	85	0.38399	1.40264e-05	82	0.230934					0
αT3	1_249242868	1	249242868	Zm00001d033064	249239730	249242765	-			gene	protein_coding		3138	αT3_10	1_249339052	103	9.49244e-07	1			1.4113e-05	83	0.23375					0
αT3	5_205285420	5	205285420	Zm00001d017724	205288559	205291755	-	bHLH-transcription factor 122	Helix-loop-helix DNA-binding domain containing protein	gene	protein_coding		-3139	αT3_31	5_205828155	3139	9.50004e-07	1			1.41235e-05	84	0.236566	NAM_JL_28	αT, γT, αT3, γT3	5_205823498	0.88	538078	531743
αT3	4_37472627	4	37472627	Zm00001d049608	37421922	37427789	-	fertilization independent endosperm1	Polycomb group protein FIE1	gene	protein_coding		50705	αT3_23	4_37472627	44838	1.64153e-06	0.586638	13152	59.4145	1.43034e-05	85	0.239383	NAM_JL_21	δT, γT, ΣT, αT3, δT3, γT3, ΣT3, ΣTT3	4_84987490	0.32	47514863	47559701
αT3	3_12900382	3	12900382	Zm00001d039717	12897204	12900576	+		Nucleotide/sugar transporter family protein	gene	protein_coding		3178	αT3_18	3_12900382	within	5.45255e-06	0.177394	4093	18.4902	1.43625e-05	86	0.242199					0
αT3	2_61947621	2	61947621	Zm00001d003846	61944273	61948903	+		Mitochondrial import inner membrane translocase subunit Tim17/Tim22/Tim23 family protein	gene	protein_coding		3348	αT3_13	2_62256750	within	3.70767e-05	0.0266705	656	2.9635	1.46615e-05	87	0.245015	NAM_JL_10	δT, γT, αT3, γT3, ΣT3	2_42787017	0.09	19160604	19157256
αT3	5_201315979	5	201315979	Zm00001d017601	201313634	201316918	+		Bifunctional dTDP-4-dehydrorhamnose 35-epimerase/dTDP-4-dehydrorhamnose reductase	gene	protein_coding		2345	αT3_31	5_205828155	within	3.98238e-06	0.24986	5716	25.8222	1.4747e-05	88	0.247831	NAM_JL_27	δT			0
αT3	5_147213647	5	147213647	Zm00001d016151	147259084	147261123	-		cytochrome P450 family 93 subfamily D polypeptide 1	gene	protein_coding		-45437			45437	1.09656e-06	1			1.6145e-05	89	0.250648	NAM_JL_26	δT, γT, ΣT, δT3, γT3, ΣT3, ΣTT3			0
αT3	5_206428308	5	206428308	Zm00001d017777	206411178	206414574	+		Adenine nucleotide alpha hydrolases-like superfamily protein	gene	protein_coding		17130	αT3_31	5_205828155	13734	1.85849e-06	0.596971	13364	60.3722	1.6322e-05	90	0.253464	NAM_JL_28	αT, γT, αT3, γT3	5_205823498	0.88	604810	587680
αT3	3_179451343	3	179451343	Zm00001d042780	179450556	179452314	-		alpha/beta-Hydrolases superfamily protein	gene	protein_coding		787			within	3.90628e-06	0.295684	6720	30.3578	1.69458e-05	91	0.25628					0
αT3	5_206301841	5	206301841	Zm00001d017770	206299496	206304043	-		Soluble inorganic pyrophosphatase 2	gene	protein_coding		2345	αT3_31	5_205828155	within	1.80483e-06	0.66179	14781	66.7736	1.74837e-05	92	0.259097	NAM_JL_28	αT, γT, αT3, γT3	5_205823498	0.88	478343	475998
αT3	5_195760724	5	195760724	Zm00001d017427	195764467	195767455	-		Metal-nicotianamine transporter YSL2	gene	protein_coding		-3743			3743	0.000874654	0.00138415	45	0.203289	1.7705e-05	93	0.261913	NAM_JL_27	δT			0
αT3	6_151393862	6	151393862	Zm00001d001444	151400500	151400739	-			ncRNA_gene	lincRNA		-6638	αT3_35	6_151393862	6638	1.22868e-06	1			1.79505e-05	94	0.264729					0
αT3	3_222373837	3	222373837	Zm00001d044222	222353432	222371706	+		tetratricopeptide repeat (TPR)-containing protein	gene	protein_coding		20405			2131	0.00011822	0.01046	281	1.26943	1.80581e-05	95	0.267545					0
αT3	5_205217773	5	205217773	Zm00001d017723	205200298	205200370	-			ncRNA_gene	tRNA		17475	αT3_31	5_205828155	17403	1.30461e-06	1			1.89815e-05	96	0.270362	NAM_JL_28	αT, γT, αT3, γT3	5_205823498	0.88	605725	623128
αT3	7_165623391	7	165623391	Zm00001d021898	165620035	165624084	-	recombination protein51 gene a	recombination protein51 gene a	gene	protein_coding		3356			within	0.00479139	0.00029188	5	0.0225876	2.02506e-05	97	0.273178					0
αT3	3_17363398	3	17363398	Zm00001d039873	17358564	17364997	-		Pentatricopeptide repeat-containing protein chloroplastic	gene	protein_coding		4834	αT3_19	3_17363398	within	3.40141e-06	0.417209	9442	42.6545	2.0528e-05	98	0.275994					0
αT3	5_9586986	5	9586986	Zm00001d013361	9588439	9591225	+		zinc ion binding	gene	protein_coding		-1453	αT3_27	5_9586986	1453	1.60612e-06	0.901624	20065	90.6442	2.09184e-05	99	0.27881					0
αT3	2_212787716	2	212787716	Zm00001d006623	212787428	212788423	-		Polygalacturonase inhibitor 1	gene	protein_coding		288			within	8.47856e-05	0.0178944	461	2.08258	2.18454e-05	100	0.281627					0
αT3	2_9054689	2	9054689	Zm00001d002256	9055230	9066450	+		Starch synthase 3 chloroplastic/amyloplastic	gene	protein_coding		-541			541	0.0130908	0.000116386	2	0.00903506	2.19313e-05	101	0.284443					0
αT3	5_898820	5	898820	Zm00001d012821	898964	904115	+		Probable inactive poly [ADP-ribose] polymerase SRO1	gene	protein_coding		-144			144	0.000291297	0.00533658	139	0.627936	2.23453e-05	102	0.287259	NAM_JL_23	δT3, ΣTT3			0
αT3	5_209996250	5	209996250	Zm00001d017910	209998574	209998645	-			ncRNA_gene	tRNA		-2324	αT3_31	5_205828155	2324	1.5818e-06	1			2.27098e-05	103	0.290075	NAM_JL_29	δT, δT3, ΣTT3			0
αT3	5_207675841	5	207675841	Zm00001d017818	207638868	207671710	-		Protease Do-like 7	gene	protein_coding		36973	αT3_31	5_205828155	4131	4.24568e-06	0.375119	8470	38.2635	2.28545e-05	104	0.292892					0
αT3	5_208025101	5	208025101	Zm00001d017830	208016509	208023474	-		Pyrophosphate--fructose 6-phosphate 1-phosphotransferase subunit alpha 2	gene	protein_coding		8592			1627	0.000161685	0.0103719	280	1.26491	2.39784e-05	105	0.295708	NAM_JL_29	δT, δT3, ΣTT3			0
αT3	5_207171144	5	207171144	Zm00001d017803	207165777	207168266	-			gene	protein_coding		5367	αT3_31	5_205828155	2878	1.7204e-06	1			2.45552e-05	106	0.298524					0
αT3	5_209501998	5	209501998	Zm00001d017880	209498712	209501781	+		Probable amino acid permease 7	gene	protein_coding		3286			217	0.000185762	0.00990389	269	1.21522	2.61354e-05	107	0.301341	NAM_JL_29	δT, δT3, ΣTT3			0
αT3	5_209428370	5	209428370	Zm00001d017877	209453899	209455860	+		Transmembrane 9 superfamily protein member 4	gene	protein_coding		-25529			25529	0.000218121	0.00870517	234	1.0571	2.69139e-05	108	0.304157	NAM_JL_29	δT, δT3, ΣTT3			0
αT3	5_207305725	5	207305725	Zm00001d017805	207302222	207308368	+		Cation/H(+) antiporter 1	gene	protein_coding		3503	αT3_31	5_205828155	within	1.90202e-06	1			2.69565e-05	109	0.306973					0
αT3	2_5853929	2	5853929	Zm00001d002091	5846187	5852086	-		Putative chloride channel-like protein CLC-g	gene	protein_coding		7742	αT3_12	2_5853929	1843	1.14502e-05	0.170347	3936	17.781	2.75947e-05	110	0.309789					0
αT3	2_219172432	2	219172432	Zm00001d006906	219167948	219172957	+		Serine/arginine-rich splicing factor SC35	gene	protein_coding		4484			within	0.00128547	0.00157681	51	0.230394	2.8598e-05	111	0.312606	NAM_JL_12	αT, δT, γT, ΣT, ΣTT3			0
αT3	8_173272610	8	173272610	Zm00001d012383	173271092	173275059	-			gene	protein_coding		1518	αT3_44	8_175559690	within	5.06504e-05	0.0404546	991	4.47687	2.88877e-05	112	0.315422					0
αT3	1_229765119	1	229765119	Zm00001d032531	229758635	229765316	+		Membrane steroid-binding protein 1	gene	protein_coding		6484			within	6.25402e-05	0.034136	844	3.81279	3.00102e-05	113	0.318238	NAM_JL_5	αT, δT, γT, ΣT, δT3, γT3, ΣTT3			0
αT3	1_43494550	1	43494550	Zm00001d028698	43439526	43446781	-		CDP-diacylglycerol--glycerol-3-phosphate 3-phosphatidyltransferase	gene	protein_coding		55024			47769	8.15759e-05	0.027114	666	3.00867	3.10138e-05	114	0.321054					0
αT3	8_176837261	8	176837261	Zm00001d012575	176835289	176839722	+		Protein MICRORCHIDIA 6	gene	protein_coding		1972	αT3_44	8_175559690	within	2.23943e-05	0.0993768	2337	10.5575	3.11912e-05	115	0.323871	NAM_JL_42	ΣT3			0
αT3	5_9462678	5	9462678	Zm00001d013357	9460784	9464546	+	bHLH-transcription factor 154	Transcription factor bHLH62	gene	protein_coding		1894			within	0.000736354	0.00303219	83	0.374955	3.12861e-05	116	0.326687					0
αT3	2_61912618	2	61912618	Zm00001d003841	61914406	61915837	+		Xanthoxin dehydrogenase	gene	protein_coding		-1788	αT3_13	2_62256750	1788	3.1121e-05	0.0782413	1857	8.38905	3.3908e-05	117	0.329503	NAM_JL_10	δT, γT, αT3, γT3, ΣT3	2_42787017	0.09	19125601	19127389
αT3	1_252741153	1	252741153	Zm00001d033170	252777188	252784963	+		Probable E3 ubiquitin-protein ligase RHB1A	gene	protein_coding		-36035	αT3_11	1_252953663	36035	3.19394e-05	0.077119	1829	8.26256	3.42722e-05	118	0.332319					0
αT3	9_19517615	9	19517615	Zm00001d045358	19517757	19531682	+		Nuclear speckle RNA-binding protein A	gene	protein_coding		-142			142	0.00378781	0.000650411	16	0.0722804	3.42787e-05	119	0.335136					0
αT3	8_176847208	8	176847208	Zm00001d012577	176845974	176846168	+			gene	protein_coding		1234			1040	0.00105367	0.00234237	66	0.298157	3.4336e-05	120	0.337952	NAM_JL_42	ΣT3			0
αT3	5_13523101	5	13523101	Zm00001d013521	13518491	13522115	-		basic helix-loop-helix (bHLH) DNA-binding superfamily protein	gene	protein_coding		4610			986	0.000156032	0.0158416	417	1.88381	3.43841e-05	121	0.340768					0
αT3	2_238168111	2	238168111	Zm00001d007718	238143557	238145188	-	benzoxazinone synthesis13	benzoxazinone synthesis13	gene	protein_coding		24554			22923	3.17438e-06	0.791413	17661	79.7841	3.4906e-05	122	0.343585					0
αT3	2_4128923	2	4128923	Zm00001d001996	4127517	4130914	+			gene	protein_coding		1406			within	0.000226644	0.0113003	300	1.35526	3.55359e-05	123	0.346401					0
αT3	10_65555857	10	65555857	Zm00001d024338	65518390	65530091	+		Protein kinase superfamily protein	gene	protein_coding		37467			25766	0.000345706	0.00751539	194	0.8764	3.60117e-05	124	0.349217	NAM_JL_49	γT, ΣT, δT3, γT3, ΣTT3			0
αT3	9_95963939	9	95963939	Zm00001d046560	95961757	95965827	+		ATPase 8 plasma membrane-type	gene	protein_coding		2182	αT3_45	9_95963939	within	2.64484e-06	1			3.66122e-05	125	0.352033	NAM_JL_45	αT, δT, γT, ΣT, αT3, δT3, γT3, ΣT3, ΣTT3	9_92908442	0.79	3055497	3053315
αT3	5_204888528	5	204888528	Zm00001d017711	204910256	204912526	+		Phosphoribulokinase	gene	protein_coding		-21728	αT3_31	5_205828155	21728	2.7404e-06	1			3.78378e-05	126	0.35485	NAM_JL_28	αT, γT, αT3, γT3	5_205823498	0.88	934970	910972
αT3	5_209096059	5	209096059	Zm00001d017863	209096527	209100036	+		Protein-tyrosine-phosphatase IBR5	gene	protein_coding		-468	αT3_31	5_205828155	468	3.08443e-06	0.894129	19918	89.9801	3.80616e-05	127	0.357666	NAM_JL_29	δT, δT3, ΣTT3			0
αT3	5_199649019	5	199649019	Zm00001d017561	199651668	199654468	+			gene	protein_coding		-2649	αT3_31	5_205828155	2649	2.76894e-06	1			3.82032e-05	128	0.360482	NAM_JL_27	δT			0
αT3	5_208647047	5	208647047	Zm00001d017847	208645801	208649527	+		Outer envelope pore protein 16-3 chloroplastic/mitochondrial	gene	protein_coding		1246	αT3_31	5_205828155	within	3.01802e-06	0.962419	21351	96.4537	3.9936e-05	129	0.363298	NAM_JL_29	δT, δT3, ΣTT3			0
αT3	4_161588954	4	161588954	Zm00001d051528	161585947	161594533	+		survival motor neuron protein	gene	protein_coding		3007	αT3_24	4_165914051	within	7.27244e-05	0.0411943	1013	4.57626	4.10977e-05	130	0.366115					0
αT3	5_210504649	5	210504649	Zm00001d017942	210507670	210509638	-			gene	protein_coding		-3021	αT3_32	5_210499709	3021	2.99833e-06	1			4.11294e-05	131	0.368931	NAM_JL_29	δT, δT3, ΣTT3			0
αT3	7_178593317	7	178593317	Zm00001d022487	178592700	178597597	+			gene	protein_coding		617			within	0.000588671	0.00518845	135	0.609866	4.18406e-05	132	0.371747					0
αT3	1_168397679	1	168397679	Zm00001d030937	168391020	168397836	+		Protein kinase superfamily protein with octicosapeptide/Phox/Bem1p domain	gene	protein_coding		6659			within	0.00714048	0.000432097	11	0.0496928	4.22352e-05	133	0.374563	NAM_JL_4	δT, δT3, γT3, ΣT3, ΣTT3			0
αT3	2_97726898	2	97726898	Zm00001d004260	97679315	97692204	-		Actin-related protein 9	gene	protein_coding		47583			34694	0.00105111	0.0029395	79	0.356885	4.22903e-05	134	0.37738	NAM_JL_10	δT, γT, αT3, γT3, ΣT3	2_42787017	0.09	54939881	54892298
αT3	5_210862681	5	210862681	Zm00001d017957	210861055	210866038	+		Peptidase family M48 family protein	gene	protein_coding		1626	αT3_32	5_210499709	within	1.27882e-05	0.241709	5554	25.0904	4.23068e-05	135	0.380196	NAM_JL_29	δT, δT3, ΣTT3			0
αT3	5_206592633	5	206592633	Zm00001d017782	206597153	206597443	+	MYB-related-transcription factor 78	SANT/MYB protein	gene	protein_coding		-4520	αT3_31	5_205828155	4520	3.10233e-06	1			4.24503e-05	136	0.383012					0
αT3	5_206352930	5	206352930	Zm00001d017772	206349763	206353137	+		Cation cation antiporter	gene	protein_coding		3167	αT3_31	5_205828155	within	4.88997e-06	0.636566	14230	64.2844	4.25829e-05	137	0.385829	NAM_JL_28	αT, γT, αT3, γT3	5_205823498	0.88	529432	526265
αT3	5_217144819	5	217144819	Zm00001d018235	217143410	217145496	-			gene	protein_coding		1409			within	0.00175251	0.0017816	56	0.252982	4.27033e-05	138	0.388645					0
αT3	8_171067718	8	171067718	Zm00001d012254	171064822	171067905	-		Putative patellin family protein	gene	protein_coding		2896			within	9.09702e-05	0.0345976	855	3.86249	4.3021e-05	139	0.391461					0
αT3	2_4812381	2	4812381	Zm00001d002033	4807574	4809601	+			gene	protein_coding		4807			2780	0.00172523	0.00182611	59	0.266534	4.30603e-05	140	0.394277					0
αT3	9_96316318	9	96316318	Zm00001d046569	96322136	96327889	-		Protein kinase superfamily protein with octicosapeptide/Phox/Bem1p domain	gene	protein_coding		-5818	αT3_45	9_95963939	5818	4.04538e-05	0.0811906	1924	8.69172	4.47551e-05	141	0.397094	NAM_JL_45	αT, δT, γT, ΣT, αT3, δT3, γT3, ΣT3, ΣTT3	9_92908442	0.79	3407876	3413694
αT3	1_39217281	1	39217281	Zm00001d028562	39215626	39217472	-		Fructose-1%252C6-bisphosphatase	gene	protein_coding		1655	αT3_4	1_39104096	within	6.33936e-06	0.520751	11660	52.6744	4.49668e-05	142	0.39991	NAM_JL_3	αT, δT, γT, ΣT, αT3, ΣTT3	1_37504706	0.39	1712575	1710920
αT3	2_62256750	2	62256750	Zm00001d003848	62255456	62263760	+			gene	protein_coding		1294	αT3_13	2_62256750	within	6.08031e-06	0.546861	12264	55.403	4.52678e-05	143	0.402726	NAM_JL_10	δT, γT, αT3, γT3, ΣT3	2_42787017	0.09	19469733	19468439
αT3	1_252381315	1	252381315	Zm00001d033155	252350669	252389978	-		DUF21 domain-containing protein chloroplastic	gene	protein_coding		30646			within	0.000382602	0.0087342	236	1.06614	4.54776e-05	144	0.405542					0
αT3	4_198168965	4	198168965	Zm00001d052702	198185534	198190149	+		Biotin synthase	gene	protein_coding		-16569			16569	0.000849567	0.00396616	100	0.451753	4.58279e-05	145	0.408359					0
αT3	3_17377838	3	17377838	Zm00001d039877	17378339	17378419	+			ncRNA_gene	tRNA		-501	αT3_19	3_17363398	501	3.43931e-06	1			4.67066e-05	146	0.411175					0
αT3	5_180358243	5	180358243	Zm00001d016933	180363906	180366525	+		loricrin-related	gene	protein_coding		-5663			5663	0.00702566	0.000501397	13	0.0587279	4.7754e-05	147	0.413991					0
αT3	3_17290713	3	17290713	Zm00001d039871	17287896	17294429	-		Transcription elongation factor (TFIIS) family protein	gene	protein_coding		2817	αT3_19	3_17363398	within	1.32037e-05	0.27176	6208	28.0448	4.85771e-05	148	0.416807					0
αT3	4_37705931	4	37705931	Zm00001d049617	37707197	37711570	-		Galactosyltransferase family protein	gene	protein_coding		-1266			1266	0.000617671	0.00581125	149	0.673112	4.85921e-05	149	0.419624	NAM_JL_21	δT, γT, ΣT, αT3, δT3, γT3, ΣT3, ΣTT3	4_84987490	0.32	47281559	47275920
αT3	9_95897899	9	95897899	Zm00001d046558	95895575	95899061	+	homogentisate geranylgeranyl transferase1	homogentisate geranylgeranyl transferase1	gene	protein_coding	Yes	2324	αT3_45	9_95963939	within	3.30694e-05	0.108581	2549	11.5152	4.86082e-05	150	0.42244	NAM_JL_45	αT, δT, γT, ΣT, αT3, δT3, γT3, ΣT3, ΣTT3	9_92908442	0.79	2989457	2987133
αT3	9_154467599	9	154467599	Zm00001d048318	154463094	154468191	+		Protoheme IX farnesyltransferase	gene	protein_coding		4505			within	0.00135572	0.00267208	73	0.32978	4.90074e-05	151	0.425256					0
αT3	5_26713927	5	26713927	Zm00001d013970	26707609	26707681	+			ncRNA_gene	tRNA		6318	αT3_28	5_26760778	6246	3.68741e-06	1			4.9819e-05	152	0.428073	NAM_JL_24	αT, δT, γT, ΣT, δT3, γT3, ΣTT3			0
αT3	5_208731936	5	208731936	Zm00001d017849	208733011	208737362	-			gene	protein_coding		-1075	αT3_31	5_205828155	1075	2.35911e-05	0.157411	3668	16.5703	5.01453e-05	153	0.430889	NAM_JL_29	δT, δT3, ΣTT3			0
αT3	2_2550685	2	2550685	Zm00001d001897	2547151	2550966	+		SEC-C motif-containing protein / OTU-like cysteine protease family protein	gene	protein_coding		3534			within	0.0046414	0.000806146	21	0.0948681	5.04972e-05	154	0.433705					0
αT3	1_40084668	1	40084668	Zm00001d028586	40092188	40097279	+		Protein TOC75-3 chloroplastic	gene	protein_coding		-7520			7520	0.000164167	0.0228621	584	2.63824	5.06416e-05	155	0.436521					0
αT3	2_22347210	2	22347210	Zm00001d002778	22322661	22328202	-	CK2 regulatory subunit B1	CK2 regulatory subunit B1	gene	protein_coding		24549			19008	0.000745905	0.00508094	132	0.596314	5.10999e-05	156	0.439338	NAM_JL_9	ΣT			0
αT3	2_199509818	2	199509818	Zm00001d006133	199509522	199514949	-		Thioesterase/thiol ester dehydrase-isomerase superfamily protein	gene	protein_coding		296			within	3.79036e-05	0.100163	2354	10.6343	5.1183e-05	157	0.442154	NAM_JL_11	γT, ΣT, ΣTT3			0
αT3	5_207142586	5	207142586	Zm00001d017802	207144269	207147422	-		Histidinol-phosphate aminotransferase 2 chloroplastic	gene	protein_coding		-1683	αT3_31	5_205828155	1683	6.4002e-06	0.616705	13797	62.3283	5.30581e-05	158	0.44497					0
αT3	8_11259952	8	11259952	Zm00001d008515	11261176	11263689	+		Heavy metal transport/detoxification superfamily protein	gene	protein_coding		-1224			1224	0.000269766	0.0147041	386	1.74377	5.33024e-05	159	0.447786	NAM_JL_40	ΣTT3			0
αT3	1_249211511	1	249211511	Zm00001d033063	249199939	249210506	-		Protein DETOXIFICATION 40	gene	protein_coding		11572	αT3_10	1_249339052	1005	3.97119e-06	1			5.33587e-05	160	0.450603					0
αT3	5_209077729	5	209077729	Zm00001d017861	209075772	209076365	+		Protein binding protein	gene	protein_coding		1957	αT3_31	5_205828155	1364	4.05498e-06	1			5.43999e-05	161	0.453419	NAM_JL_29	δT, δT3, ΣTT3			0
αT3	1_252546819	1	252546819	Zm00001d033160	252546119	252549217	-		Transposon protein	gene	protein_coding		700			within	0.000411102	0.009879	267	1.20618	5.44781e-05	162	0.456235					0
αT3	8_170747188	8	170747188	Zm00001d012238	170738666	170744400	-		RNA-binding (RRM/RBD/RNP motifs) family protein	gene	protein_coding		8522	αT3_44	8_175559690	2788	3.15791e-05	0.135472	3168	14.3115	5.71637e-05	163	0.459051					0
αT3	1_248399093	1	248399093	Zm00001d033044	248431212	248432937	-		GDSL esterase/lipase	gene	protein_coding		-32119	αT3_10	1_249339052	32119	7.33115e-05	0.0593085	1413	6.38327	5.80275e-05	164	0.461868					0
αT3	2_10679065	2	10679065	Zm00001d002349	10674198	10679341	-	kaurene synthase3	kaurene synthase3	gene	protein_coding		4867			within	0.00100832	0.00433772	109	0.492411	5.83458e-05	165	0.464684					0
αT3	7_168426957	7	168426957	Zm00001d022041	168429144	168434437	-			gene	protein_coding		-2187	αT3_40	7_168426957	2187	7.91854e-06	0.565672	12655	57.1693	5.96465e-05	166	0.4675					0
αT3	8_175559690	8	175559690	Zm00001d012503	175558015	175570673	+		Nucleic acid-binding OB-fold-like protein	gene	protein_coding		1675	αT3_44	8_175559690	within	1.06431e-05	0.421868	9547	43.1288	5.97783e-05	167	0.470317	NAM_JL_42	ΣT3			0
αT3	2_4668116	2	4668116	Zm00001d002029	4666311	4670063	-	ZIM-transcription factor 32	Protein TIFY 3B	gene	protein_coding		1805			within	4.1175e-05	0.10911	2560	11.5649	5.98105e-05	168	0.473133					0
αT3	9_102280689	9	102280689	Zm00001d046683	102308408	102321689	+		Stromal processing peptidase chloroplastic	gene	protein_coding		-27719			27719	0.000238265	0.0188622	495	2.23618	5.98301e-05	169	0.475949	NAM_JL_45	αT, δT, γT, ΣT, αT3, δT3, γT3, ΣT3, ΣTT3	9_92908442	0.79	9372247	9399966
αT3	5_207525727	5	207525727	Zm00001d017813	207525809	207526282	+		17.4 kDa class I heat shock protein 3	gene	protein_coding		-82	αT3_31	5_205828155	82	4.54874e-06	1			6.05012e-05	170	0.478765					0
αT3	4_243720811	4	243720811	Zm00001d053928	243712603	243720508	-		Ubiquitin-like-specific protease 1D	gene	protein_coding		8208			303	3.5377e-05	0.129761	3035	13.7107	6.10153e-05	171	0.481582					0
αT3	2_2638131	2	2638131	Zm00001d001903	2637031	2639743	+		Carboxylesterase SOBER1	gene	protein_coding		1100			within	0.000968401	0.00485802	124	0.560173	6.24147e-05	172	0.484398					0
αT3	5_209983197	5	209983197	Zm00001d017908	209974275	209978114	-	bHLH-transcription factor 156	Transcription factor BIM3	gene	protein_coding		8922	αT3_31	5_205828155	5083	8.53938e-06	0.563163	12602	56.9299	6.36962e-05	173	0.487214	NAM_JL_29	δT, δT3, ΣTT3			0
αT3	1_41834652	1	41834652	Zm00001d028653	41833738	41838204	+	dTDP-glucose dehydratase homolog csu219	dTDP-glucose dehydratase homolog csu219	gene	protein_coding		914			within	0.000790442	0.00609217	155	0.700217	6.37749e-05	174	0.49003					0
αT3	5_206347024	5	206347024	Zm00001d017771	206343101	206346122	-		Isoflavone reductase	gene	protein_coding		3923	αT3_31	5_205828155	902	9.93851e-06	0.487902	10952	49.476	6.41852e-05	175	0.492847	NAM_JL_28	αT, γT, αT3, γT3	5_205823498	0.88	523526	519603
αT3	1_39235128	1	39235128	Zm00001d028565	39236494	39239663	+			gene	protein_coding		-1366	αT3_4	1_39104096	1366	4.89057e-05	0.0994065	2338	10.562	6.43384e-05	176	0.495663	NAM_JL_3	αT, δT, γT, ΣT, αT3, ΣTT3	1_37504706	0.39	1730422	1731788
αT3	2_212769381	2	212769381	Zm00001d006620	212765615	212768754	-		Protein TIC 20-IV chloroplastic	gene	protein_coding		3766			627	0.00117302	0.00416119	104	0.469823	6.45784e-05	177	0.498479					0
γT	5_25434949	5	25434949	Zm00001d013937	25431430	25434346	-	GRMZM2G073351	Protochlorophyllide reductase C chloroplastic	gene	protein_coding	Yes	3519	γT_3	5_25434949	603	5.21209e-18	1.1885e-06	2	0.00903506	3.37222e-22	1	0.00281065	NAM_JL_24	αT, δT, γT, ΣT, δT3, γT3, ΣTT3	5_25433577	0.89	1372	within
γT	1_231124446	1	231124446	Zm00001d032576	231120510	231123615	-	GRMZM2G036455	Protochlorophyllide reductase C chloroplastic	gene	protein_coding	Yes	3936	γT_2	1_230571704	831	7.39956e-13	1.06775e-07	1	0.00451753	3.55419e-18	2	0.00562129	NAM_JL_5	αT, δT, γT, ΣT, δT3, γT3, ΣTT3	1_230879002	0.6	245444	241508
γT	5_25179181	5	25179181	Zm00001d013933	25177803	25179923	-		CBS domain-containing protein CBSX5	gene	protein_coding		1378	γT_3	5_25434949	within	1.17169e-11	9.13058e-06	4	0.0180701	4.04113e-15	3	0.00843194	NAM_JL_24	αT, δT, γT, ΣT, δT3, γT3, ΣTT3	5_25433577	0.89	254396	253654
γT	1_230673989	1	230673989	Zm00001d032566	230666267	230672973	-			gene	protein_coding		7722	γT_2	1_230571704	1016	1.36087e-10	1.65187e-06	3	0.0135526	8.3246e-15	4	0.0112426	NAM_JL_5	αT, δT, γT, ΣT, δT3, γT3, ΣTT3	1_230879002	0.6	205013	206029
γT	5_25518275	5	25518275	Zm00001d013940	25518163	25523534	+		Nucleolar complex protein 2 homolog	gene	protein_coding		112	γT_3	5_25434949	within	1.11302e-15	0.356908	8196	37.0257	1.44844e-14	5	0.0140532	NAM_JL_24	αT, δT, γT, ΣT, δT3, γT3, ΣTT3	5_25433577	0.89	84698	84586
γT	5_205828155	5	205828155	Zm00001d017746	205825586	205829216	+	vitamin E synthesis4	vitamin E synthesis4	gene	protein_coding	Yes	2569	γT_5	5_205828155	within	2.84053e-14	0.329098	7600	34.3332	3.11326e-13	6	0.0168639	NAM_JL_28	αT, γT, αT3, γT3	5_206102387	0.11	274232	273171
γT	1_231458031	1	231458031	Zm00001d032591	231449534	231455154	+		Endosomal targeting BRO1-like domain-containing protein	gene	protein_coding		8497	γT_2	1_230571704	2877	3.01405e-13	0.0373099	953	4.3052	3.72433e-13	7	0.0196745	NAM_JL_5	αT, δT, γT, ΣT, δT3, γT3, ΣTT3	1_230879002	0.6	579029	570532
γT	1_231045647	1	231045647	Zm00001d032575	231049610	231065263	-		WAPL (Wings apart-like protein regulation of heterochromatin) protein	gene	protein_coding		-3963	γT_2	1_230571704	3963	6.49633e-13	0.022532	608	2.74666	4.80919e-13	8	0.0224852	NAM_JL_5	αT, δT, γT, ΣT, δT3, γT3, ΣTT3	1_230879002	0.6	166645	170608
γT	5_205737388	5	205737388	Zm00001d017742	205734245	205737675	-	GRF-transcription factor 6	Growth-regulating factor 6	gene	protein_coding		3143	γT_5	5_205828155	within	6.97602e-11	0.000465934	19	0.085833	1.04198e-12	9	0.0252958	NAM_JL_28	αT, γT, αT3, γT3	5_206102387	0.11	364999	364712
γT	1_230571704	1	230571704	Zm00001d032562	230560853	230563661	-		evolutionarily conserved C-terminal region 2	gene	protein_coding		10851	γT_2	1_230571704	8043	1.20315e-13	0.395682	9107	41.1411	1.50797e-12	10	0.0281065	NAM_JL_5	αT, δT, γT, ΣT, δT3, γT3, ΣTT3	1_230879002	0.6	307298	315341
γT	1_230958704	1	230958704	Zm00001d032572	230960883	230963337	-		LanC-like protein 2	gene	protein_coding		-2179	γT_2	1_230571704	2179	1.0049e-12	0.0673499	1654	7.47199	2.12e-12	11	0.0309171	NAM_JL_5	αT, δT, γT, ΣT, δT3, γT3, ΣTT3	1_230879002	0.6	79702	81881
γT	5_25545001	5	25545001	Zm00001d013944	25544795	25545626	+			gene	protein_coding		206	γT_3	5_25434949	within	8.09889e-14	1			2.52236e-12	12	0.0337278	NAM_JL_24	αT, δT, γT, ΣT, δT3, γT3, ΣTT3	5_25433577	0.89	111424	111218
γT	1_230539545	1	230539545	Zm00001d022934	230537327	230539727	+			ncRNA_gene	lincRNA		2218	γT_2	1_230571704	within	5.1433e-13	1			1.50678e-11	13	0.0365384	NAM_JL_5	αT, δT, γT, ΣT, δT3, γT3, ΣTT3	1_230879002	0.6	339457	339275
γT	1_230539545	1	230539545	Zm00001d022933	230537327	230537769	+			ncRNA_gene	lincRNA		2218	γT_2	1_230571704	1776	5.1433e-13	1			1.50678e-11	14	0.0393491	NAM_JL_5	αT, δT, γT, ΣT, δT3, γT3, ΣTT3	1_230879002	0.6	339457	341233
γT	5_25541201	5	25541201	Zm00001d013943	25539709	25540838	-		FIP1	gene	protein_coding		1492	γT_3	5_25434949	363	2.92574e-12	0.480572	10971	49.5618	3.97768e-11	15	0.0421597	NAM_JL_24	αT, δT, γT, ΣT, δT3, γT3, ΣTT3	5_25433577	0.89	107624	106132
γT	5_25230714	5	25230714	Zm00001d013935	25228457	25241728	-		WAPL (Wings apart-like protein regulation of heterochromatin) protein	gene	protein_coding		2257	γT_3	5_25434949	within	5.28998e-12	0.358411	8232	37.1883	5.30711e-11	16	0.0449703	NAM_JL_24	αT, δT, γT, ΣT, δT3, γT3, ΣTT3	5_25433577	0.89	202863	191849
γT	1_231277575	1	231277575	Zm00001d032582	231197140	231210494	-			gene	protein_coding		80435	γT_2	1_230571704	67081	3.21206e-12	0.67175	15097	68.2011	6.01178e-11	17	0.047781	NAM_JL_5	αT, δT, γT, ΣT, δT3, γT3, ΣTT3	1_230879002	0.6	398573	318138
γT	5_25534731	5	25534731	Zm00001d013941	25536275	25537969	+		Pentatricopeptide repeat-containing protein chloroplastic	gene	protein_coding		-1544	γT_3	5_25434949	1544	2.74928e-12	1			7.59341e-11	18	0.0505916	NAM_JL_24	αT, δT, γT, ΣT, δT3, γT3, ΣTT3	5_25433577	0.89	101154	102698
γT	1_231647326	1	231647326	Zm00001d032600	231640138	231644331	-		RING/U-box superfamily protein	gene	protein_coding		7188	γT_2	1_230571704	2995	4.86549e-11	0.0585004	1429	6.45555	7.85159e-11	19	0.0534023	NAM_JL_5	αT, δT, γT, ΣT, δT3, γT3, ΣTT3	1_230879002	0.6	768324	761136
γT	1_231364495	1	231364495	Zm00001d032587	231348416	231372317	+		DNA-directed RNA polymerase I subunit 2	gene	protein_coding		16079	γT_2	1_230571704	within	5.06968e-12	0.62925	14210	64.1941	8.7635e-11	20	0.0562129	NAM_JL_5	αT, δT, γT, ΣT, δT3, γT3, ΣTT3	1_230879002	0.6	485493	469414
γT	1_231277575	1	231277575	Zm00001d032583	231199003	231199076	+			ncRNA_gene	tRNA		78572	γT_2	1_230571704	78499	3.21206e-12	1			8.82162e-11	21	0.0590236	NAM_JL_5	αT, δT, γT, ΣT, δT3, γT3, ΣTT3	1_230879002	0.6	398573	320001
γT	1_231277575	1	231277575	Zm00001d032584	231200272	231203229	+		Actin-11	gene	protein_coding		77303	γT_2	1_230571704	74346	3.21206e-12	1			8.82162e-11	22	0.0618342	NAM_JL_5	αT, δT, γT, ΣT, δT3, γT3, ΣTT3	1_230879002	0.6	398573	321270
γT	1_231406358	1	231406358	Zm00001d032588	231396624	231401913	-		Succinate dehydrogenase subunit 3-2 mitochondrial	gene	protein_coding		9734	γT_2	1_230571704	4445	9.65106e-12	0.359874	8262	37.3238	9.51159e-11	23	0.0646449	NAM_JL_5	αT, δT, γT, ΣT, δT3, γT3, ΣTT3	1_230879002	0.6	527356	517622
γT	1_230792043	1	230792043	Zm00001d032568	230778341	230778667	-		HR-like lesion-inducing protein-related	gene	protein_coding		13702	γT_2	1_230571704	13376	5.01622e-12	1			1.3553e-10	24	0.0674555	NAM_JL_5	αT, δT, γT, ΣT, δT3, γT3, ΣTT3	1_230879002	0.6	86959	100335
γT	1_231174813	1	231174813	Zm00001d032579	231178877	231179514	-			gene	protein_coding		-4064	γT_2	1_230571704	4064	5.98825e-12	1			1.60732e-10	25	0.0702662	NAM_JL_5	αT, δT, γT, ΣT, δT3, γT3, ΣTT3	1_230879002	0.6	295811	299875
γT	1_230819198	1	230819198	Zm00001d032569	230852598	230853237	-		Ras-related protein RABA6a	gene	protein_coding		-33400	γT_2	1_230571704	33400	6.21309e-12	1			1.66538e-10	26	0.0730768	NAM_JL_5	αT, δT, γT, ΣT, δT3, γT3, ΣTT3	1_230879002	0.6	59804	25765
γT	1_230853549	1	230853549	Zm00001d032570	230853577	230855383	-		soluble epoxide hydrolase	gene	protein_coding		-28	γT_2	1_230571704	28	7.40627e-11	0.108951	2618	11.8269	2.1418e-10	27	0.0758875	NAM_JL_5	αT, δT, γT, ΣT, δT3, γT3, ΣTT3	1_230879002	0.6	25453	23619
γT	1_230862687	1	230862687	Zm00001d032571	230863189	230864361	-		LisH/CRA/RING-U-box domains-containing protein	gene	protein_coding		-502	γT_2	1_230571704	502	1.41823e-11	0.579451	13121	59.2745	2.17978e-10	28	0.0786981	NAM_JL_5	αT, δT, γT, ΣT, δT3, γT3, ΣTT3	1_230879002	0.6	16315	14641
γT	1_231439051	1	231439051	Zm00001d032590	231427968	231433366	+			gene	protein_coding		11083	γT_2	1_230571704	5685	9.65106e-12	1			2.5444e-10	29	0.0815088	NAM_JL_5	αT, δT, γT, ΣT, δT3, γT3, ΣTT3	1_230879002	0.6	560049	548966
γT	5_25188756	5	25188756	Zm00001d013934	25185480	25187200	-		soluble epoxide hydrolase	gene	protein_coding		3276	γT_3	5_25434949	1556	2.98972e-11	0.3468	7968	35.9957	2.72607e-10	30	0.0843194	NAM_JL_24	αT, δT, γT, ΣT, δT3, γT3, ΣTT3	5_25433577	0.89	244821	246377
γT	1_230537061	1	230537061	Zm00001d022932	230536285	230537257	+			ncRNA_gene	lincRNA		776	γT_2	1_230571704	within	1.18298e-11	1			3.09473e-10	31	0.08713	NAM_JL_5	αT, δT, γT, ΣT, δT3, γT3, ΣTT3	1_230879002	0.6	341941	341745
γT	5_205893925	5	205893925	Zm00001d017751	205889941	205895577	+	organelle transcript processing51	Pentatricopeptide repeat-containing protein chloroplastic	gene	protein_coding		3984	γT_5	5_205828155	within	7.28834e-11	0.211297	4978	22.4883	3.98809e-10	32	0.0899407	NAM_JL_28	αT, γT, αT3, γT3	5_206102387	0.11	208462	206810
γT	1_231425128	1	231425128	Zm00001d032589	231420001	231423056	+		hAT transposon superfamily protein	gene	protein_coding		5127	γT_2	1_230571704	2072	1.81423e-11	1			4.66852e-10	33	0.0927513	NAM_JL_5	αT, δT, γT, ΣT, δT3, γT3, ΣTT3	1_230879002	0.6	546126	540999
γT	1_231517855	1	231517855	Zm00001d032592	231532863	231532935	+			ncRNA_gene	tRNA		-15008	γT_2	1_230571704	15008	1.82931e-11	1			4.70581e-10	34	0.095562	NAM_JL_5	αT, δT, γT, ΣT, δT3, γT3, ΣTT3	1_230879002	0.6	638853	653861
γT	1_231548763	1	231548763	Zm00001d032597	231553045	231559488	-		Nucleic acid binding protein	gene	protein_coding		-4282	γT_2	1_230571704	4282	2.66354e-11	0.760096	17049	77.0193	5.18751e-10	35	0.0983726	NAM_JL_5	αT, δT, γT, ΣT, δT3, γT3, ΣTT3	1_230879002	0.6	669761	674043
γT	5_205893925	5	205893925	Zm00001d017752	205893484	205894854	-		Transcription factor GT-3b	gene	protein_coding		441	γT_5	5_205828155	within	7.28834e-11	0.305299	7074	31.957	5.68044e-10	36	0.101183	NAM_JL_28	αT, γT, αT3, γT3	5_206102387	0.11	208462	207533
γT	1_231611868	1	231611868	Zm00001d022936	231609214	231610002	+			ncRNA_gene	lincRNA		2654	γT_2	1_230571704	1866	2.96175e-11	1			7.47623e-10	37	0.103994	NAM_JL_5	αT, δT, γT, ΣT, δT3, γT3, ΣTT3	1_230879002	0.6	732866	730212
γT	5_205852534	5	205852534	Zm00001d017748	205851491	205853476	+		3-dehydrosphinganine reductase TSC10B	gene	protein_coding		1043	γT_5	5_205828155	within	6.9414e-11	0.547957	12472	56.3426	9.50613e-10	38	0.106805	NAM_JL_28	αT, γT, αT3, γT3	5_206102387	0.11	249853	248911
γT	1_230726037	1	230726037	Zm00001d032567	230714286	230732552	-		Mediator of RNA polymerase II transcription subunit 16	gene	protein_coding		11751	γT_2	1_230571704	within	1.92794e-10	0.292071	6780	30.6288	1.38523e-09	39	0.109615	NAM_JL_5	αT, δT, γT, ΣT, δT3, γT3, ΣTT3	1_230879002	0.6	152965	146450
γT	5_205747354	5	205747354	Zm00001d017743	205749775	205753794	+		Cell division control protein 48 homolog D	gene	protein_coding		-2421	γT_5	5_205828155	2421	8.42973e-11	1			2.03971e-09	40	0.112426	NAM_JL_28	αT, γT, αT3, γT3	5_206102387	0.11	355033	348593
γT	1_230532500	1	230532500	Zm00001d032560	230529377	230531598	-		CBS domain-containing protein CBSX5	gene	protein_coding		3123	γT_2	1_230571704	902	1.86839e-09	0.049271	1216	5.49331	2.21937e-09	41	0.115237	NAM_JL_5	αT, δT, γT, ΣT, δT3, γT3, ΣTT3	1_230879002	0.6	346502	347404
γT	5_25313346	5	25313346	Zm00001d013936	25242212	25245116	+			gene	protein_coding		71134	γT_3	5_25434949	68230	9.51433e-11	1			2.29064e-09	42	0.118047	NAM_JL_24	αT, δT, γT, ΣT, δT3, γT3, ΣTT3	5_25433577	0.89	120231	188461
γT	5_25547183	5	25547183	Zm00001d013945	25546118	25546714	-		Ripening-related protein 3	gene	protein_coding		1065	γT_3	5_25434949	469	1.15226e-10	1			2.75208e-09	43	0.120858	NAM_JL_24	αT, δT, γT, ΣT, δT3, γT3, ΣTT3	5_25433577	0.89	113606	112541
γT	1_231673544	1	231673544	Zm00001d032601	231674392	231677680	-		ABC transporter G family member 11	gene	protein_coding		-848	γT_2	1_230571704	848	8.19508e-10	0.38039	8757	39.56	7.1352e-09	44	0.123668	NAM_JL_5	αT, δT, γT, ΣT, δT3, γT3, ΣTT3	1_230879002	0.6	794542	795390
γT	1_230627110	1	230627110	Zm00001d032564	230626458	230626757	+			gene	protein_coding		652	γT_2	1_230571704	353	3.24758e-10	1			7.42006e-09	45	0.126479	NAM_JL_5	αT, δT, γT, ΣT, δT3, γT3, ΣTT3	1_230879002	0.6	251892	252245
γT	1_230439046	1	230439046	Zm00001d032556	230440139	230441090	+	GNAT-transcription factor 4	Acetyltransferase	gene	protein_coding		-1093	γT_2	1_230571704	1093	3.80471e-08	0.0111486	315	1.42302	9.57817e-09	46	0.12929	NAM_JL_5	αT, δT, γT, ΣT, δT3, γT3, ΣTT3	1_230879002	0.6	439956	437912
γT	5_205896775	5	205896775	Zm00001d017753	205897970	205901088	+		Carboxylic ester hydrolase	gene	protein_coding		-1195	γT_5	5_205828155	1195	1.26268e-08	0.0394808	985	4.44977	1.11764e-08	47	0.1321	NAM_JL_28	αT, γT, αT3, γT3	5_206102387	0.11	205612	201299
γT	5_24939753	5	24939753	Zm00001d013923	24943241	24945641	+		Pentatricopeptide repeat-containing protein mitochondrial	gene	protein_coding		-3488	γT_3	5_25434949	3488	1.71322e-09	0.330528	7623	34.4371	1.26232e-08	48	0.134911	NAM_JL_24	αT, δT, γT, ΣT, δT3, γT3, ΣTT3	5_25433577	0.89	493824	487936
γT	5_26160680	5	26160680	Zm00001d013957	26165521	26170988	-		Ser/Thr protein phosphatase family	gene	protein_coding		-4841	γT_3	5_25434949	4841	1.00924e-09	0.747353	16755	75.6912	1.65977e-08	49	0.137722	NAM_JL_24	αT, δT, γT, ΣT, δT3, γT3, ΣTT3	5_25433577	0.89	727103	731944
γT	5_205849230	5	205849230	Zm00001d017747	205846897	205847565	+		General transcription factor 2-related zinc finger protein	gene	protein_coding		2333	γT_5	5_205828155	1665	1.01277e-09	1			2.19877e-08	50	0.140532	NAM_JL_28	αT, γT, αT3, γT3	5_206102387	0.11	253157	254822
γT	5_25009608	5	25009608	Zm00001d013927	25004008	25010095	-		Monothiol glutaredoxin-S17	gene	protein_coding		5600	γT_3	5_25434949	within	1.18112e-08	0.0950452	2290	10.3451	2.42567e-08	51	0.143343	NAM_JL_24	αT, δT, γT, ΣT, δT3, γT3, ΣTT3	5_25433577	0.89	423969	423482
γT	5_25623162	5	25623162	Zm00001d013947	25632561	25633358	-		NHL25	gene	protein_coding		-9399	γT_3	5_25434949	9399	1.19982e-09	1			2.58454e-08	52	0.146154	NAM_JL_24	αT, δT, γT, ΣT, δT3, γT3, ΣTT3	5_25433577	0.89	189585	198984
γT	1_230528837	1	230528837	Zm00001d032559	230528661	230528733	-			ncRNA_gene	tRNA		176	γT_2	1_230571704	104	1.3241e-09	1			2.83921e-08	53	0.148964	NAM_JL_5	αT, δT, γT, ΣT, δT3, γT3, ΣTT3	1_230879002	0.6	350165	350269
γT	1_230983282	1	230983282	Zm00001d032573	230979145	230982119	-		Probable prolyl 4-hydroxylase 3	gene	protein_coding		4137	γT_2	1_230571704	1163	6.36339e-09	0.255834	5959	26.9199	3.45714e-08	54	0.151775	NAM_JL_5	αT, δT, γT, ΣT, δT3, γT3, ΣTT3	1_230879002	0.6	104280	100143
γT	1_230403361	1	230403361	Zm00001d032555	230382672	230388742	-		Expressed protein%3B protein	gene	protein_coding		20689	γT_2	1_230571704	14619	2.48761e-08	0.066877	1641	7.41326	3.52928e-08	55	0.154586	NAM_JL_5	αT, δT, γT, ΣT, δT3, γT3, ΣTT3	1_230879002	0.6	475641	490260
γT	1_230532500	1	230532500	Zm00001d032561	230530692	230531598	-			gene	protein_coding		1808	γT_2	1_230571704	902	1.86839e-09	1			3.94196e-08	56	0.157396	NAM_JL_5	αT, δT, γT, ΣT, δT3, γT3, ΣTT3	1_230879002	0.6	346502	347404
γT	1_230442868	1	230442868	Zm00001d032557	230443208	230447035	-		RING/U-box superfamily protein	gene	protein_coding		-340	γT_2	1_230571704	340	3.23143e-09	0.620176	14004	63.2635	4.21415e-08	57	0.160207	NAM_JL_5	αT, δT, γT, ΣT, δT3, γT3, ΣTT3	1_230879002	0.6	436134	431967
γT	1_230661277	1	230661277	Zm00001d032565	230664256	230666245	+		Microtubule-associated protein RP/EB family member 1C	gene	protein_coding		-2979	γT_2	1_230571704	2979	9.99323e-09	0.271223	6296	28.4424	5.61761e-08	58	0.163018	NAM_JL_5	αT, δT, γT, ΣT, δT3, γT3, ΣTT3	1_230879002	0.6	217725	212757
γT	1_230476681	1	230476681	Zm00001d032558	230456520	230456810	+			gene	protein_coding		20161	γT_2	1_230571704	19871	2.86825e-09	1			5.92856e-08	59	0.165828	NAM_JL_5	αT, δT, γT, ΣT, δT3, γT3, ΣTT3	1_230879002	0.6	402321	422192
γT	1_230614433	1	230614433	Zm00001d032563	230613798	230614382	-			gene	protein_coding		635	γT_2	1_230571704	51	6.77545e-09	0.481735	10991	49.6522	6.7043e-08	60	0.168639	NAM_JL_5	αT, δT, γT, ΣT, δT3, γT3, ΣTT3	1_230879002	0.6	264569	264620
γT	5_26134678	5	26134678	Zm00001d013956	26132024	26133292	+	tonoplast intrinsic protein3	tonoplast intrinsic protein3	gene	protein_coding		2654	γT_3	5_25434949	1386	2.61269e-08	0.13315	3174	14.3386	7.12336e-08	61	0.171449	NAM_JL_24	αT, δT, γT, ΣT, δT3, γT3, ΣTT3	5_25433577	0.89	701101	698447
γT	1_231149146	1	231149146	Zm00001d032578	231149171	231150619	+	C2C2-Dof-transcription factor 13	Dof zinc finger protein DOF1.6	gene	protein_coding		-25	γT_2	1_230571704	25	8.66483e-07	0.00668676	194	0.8764	1.15685e-07	62	0.17426	NAM_JL_5	αT, δT, γT, ΣT, δT3, γT3, ΣTT3	1_230879002	0.6	270144	270169
γT	5_203247398	5	203247398	Zm00001d017654	203245360	203251909	-		GPI transamidase subunit PIG-U	gene	protein_coding		2038	γT_5	5_205828155	within	2.20355e-06	0.00491453	155	0.700217	2.09451e-07	63	0.177071					0
γT	5_205640412	5	205640412	Zm00001d017740	205615626	205616553	-		Expansin-B4	gene	protein_coding		24786	γT_5	5_205828155	23859	1.11301e-08	1			2.14963e-07	64	0.179881	NAM_JL_28	αT, γT, αT3, γT3	5_206102387	0.11	461975	485834
γT	1_230361893	1	230361893	Zm00001d032553	230368677	230369198	-		Plant UBX domain-containing protein 10	gene	protein_coding		-6784	γT_2	1_230571704	6784	1.13629e-08	1			2.19224e-07	65	0.182692	NAM_JL_5	αT, δT, γT, ΣT, δT3, γT3, ΣTT3	1_230879002	0.6	517109	509804
γT	5_24850845	5	24850845	Zm00001d013920	24847545	24853940	-		Phosphatidylinositol 4-phosphate 5-kinase 9	gene	protein_coding		3300	γT_3	5_25434949	within	6.83815e-08	0.166645	3978	17.9707	2.19819e-07	66	0.185503	NAM_JL_24	αT, δT, γT, ΣT, δT3, γT3, ΣTT3	5_25433577	0.89	582732	579637
γT	1_230375151	1	230375151	Zm00001d032554	230369805	230381443	-		HIT-type Zinc finger family protein	gene	protein_coding		5346	γT_2	1_230571704	within	1.46005e-08	0.952745	21147	95.5322	2.65562e-07	67	0.188313	NAM_JL_5	αT, δT, γT, ΣT, δT3, γT3, ΣTT3	1_230879002	0.6	503851	497559
γT	5_205953868	5	205953868	Zm00001d017755	205944885	205951175	-		Rop guanine nucleotide exchange factor 14	gene	protein_coding		8983	γT_5	5_205828155	2693	1.9632e-08	0.747512	16761	75.7183	2.79372e-07	68	0.191124	NAM_JL_28	αT, γT, αT3, γT3	5_206102387	0.11	148519	151212
γT	5_90075475	5	90075475	Zm00001d015435	90052984	90074741	-		Protein STRUBBELIG-RECEPTOR FAMILY 1	gene	protein_coding		22491			734	3.48707e-06	0.00448801	139	0.627936	2.96924e-07	69	0.193935	NAM_JL_26	δT, γT, ΣT, δT3, γT3, ΣT3, ΣTT3	5_95842646	0.14	5767171	5767905
γT	5_205472279	5	205472279	Zm00001d017730	205467077	205473131	-		Protein BREVIS RADIX	gene	protein_coding		5202	γT_5	5_205828155	within	1.72903e-08	0.957076	21231	95.9116	3.13041e-07	70	0.196745	NAM_JL_28	αT, γT, αT3, γT3	5_206102387	0.11	630108	629256
γT	1_219234823	1	219234823	Zm00001d032257	219226773	219232499	-		Aminoaldehyde dehydrogenase 1b	gene	protein_coding		8050	γT_1	1_219324087	2324	2.07695e-07	0.0809688	1962	8.86339	3.17853e-07	71	0.199556					0
γT	5_25847881	5	25847881	Zm00001d013949	25847189	25847818	-		Ripening-related protein 3	gene	protein_coding		692	γT_3	5_25434949	63	1.97904e-08	1			3.70834e-07	72	0.202367	NAM_JL_24	αT, δT, γT, ΣT, δT3, γT3, ΣTT3	5_25433577	0.89	414304	413612
γT	1_230403361	1	230403361	Zm00001d022931	230388365	230388872	+			ncRNA_gene	lincRNA		14996	γT_2	1_230571704	14489	2.48761e-08	1			4.6044e-07	73	0.205177	NAM_JL_5	αT, δT, γT, ΣT, δT3, γT3, ΣTT3	1_230879002	0.6	475641	490130
γT	5_206004214	5	206004214	Zm00001d017756	206004272	206007539	-		Syntaxin-22	gene	protein_coding		-58	γT_5	5_205828155	58	3.28468e-08	0.999174	22116	99.9096	5.98376e-07	74	0.207988	NAM_JL_28	αT, γT, αT3, γT3	5_206102387	0.11	98173	94848
γT	5_205920627	5	205920627	Zm00001d017754	205924278	205940214	-		yeast YAK1-related gene 1	gene	protein_coding		-3651			3651	1.24093e-05	0.00294192	97	0.4382	6.6172e-07	75	0.210799	NAM_JL_28	αT, γT, αT3, γT3	5_206102387	0.11	181760	162173
γT	5_24711584	5	24711584	Zm00001d013917	24714057	24714383	+			gene	protein_coding		-2473	γT_3	5_25434949	2473	4.29214e-08	1			7.71036e-07	76	0.213609	NAM_JL_24	αT, δT, γT, ΣT, δT3, γT3, ΣTT3	5_25433577	0.89	721993	719194
γT	1_231871130	1	231871130	Zm00001d032605	231856279	231868220	-		Alpha-galactosidase 2	gene	protein_coding		14851	γT_2	1_230571704	2910	1.53324e-07	0.300556	6966	31.4691	8.24547e-07	77	0.21642	NAM_JL_5	αT, δT, γT, ΣT, δT3, γT3, ΣTT3	1_230879002	0.6	992128	977277
γT	5_24958760	5	24958760	Zm00001d013924	24948366	24954210	-		Phosphoinositide phosphatase SAC2	gene	protein_coding		10394	γT_3	5_25434949	4550	4.82887e-08	1			8.61764e-07	78	0.21923	NAM_JL_24	αT, δT, γT, ΣT, δT3, γT3, ΣTT3	5_25433577	0.89	474817	479367
γT	5_26094323	5	26094323	Zm00001d013954	26095480	26098512	+		Tetratricopeptide repeat (TPR)-like superfamily protein	gene	protein_coding		-1157	γT_3	5_25434949	1157	2.83592e-07	0.194527	4591	20.74	9.77154e-07	79	0.222041	NAM_JL_24	αT, δT, γT, ΣT, δT3, γT3, ΣTT3	5_25433577	0.89	660746	661903
γT	1_230304303	1	230304303	Zm00001d032552	230238930	230243910	-		Protein NEOXANTHIN-DEFICIENT 1	gene	protein_coding		65373	γT_2	1_230571704	60393	1.91487e-06	0.0309256	810	3.6592	1.04473e-06	80	0.224852	NAM_JL_5	αT, δT, γT, ΣT, δT3, γT3, ΣTT3	1_230879002	0.6	574699	635092
γT	1_220342628	1	220342628	Zm00001d032283	220368811	220372532	+			gene	protein_coding		-26183	γT_1	1_219324087	26183	8.39223e-07	0.0844581	2058	9.29707	1.23771e-06	81	0.227662					0
γT	5_205283403	5	205283403	Zm00001d017724	205288559	205291755	-	bHLH-transcription factor 122	Helix-loop-helix DNA-binding domain containing protein	gene	protein_coding		-5156	γT_5	5_205828155	5156	7.57341e-08	1			1.31747e-06	82	0.230473	NAM_JL_28	αT, γT, αT3, γT3	5_206102387	0.11	818984	810632
γT	5_26529475	5	26529475	Zm00001d013966	26539982	26542353	+		Succinate dehydrogenase subunit 3	gene	protein_coding		-10507			10507	3.83775e-06	0.02369	643	2.90477	1.56497e-06	83	0.233284	NAM_JL_24	αT, δT, γT, ΣT, δT3, γT3, ΣTT3	5_25433577	0.89	1095898	1106405
γT	5_27867378	5	27867378	Zm00001d013996	27841955	27848005	-		Syntaxin-41	gene	protein_coding		25423			19373	3.04e-05	0.00342929	109	0.492411	1.78023e-06	84	0.236094	NAM_JL_24	αT, δT, γT, ΣT, δT3, γT3, ΣTT3	5_25433577	0.89	2433801	2408378
γT	5_205226785	5	205226785	Zm00001d017723	205200298	205200370	-			ncRNA_gene	tRNA		26487	γT_5	5_205828155	26415	1.17177e-07	1			1.98727e-06	85	0.238905	NAM_JL_28	αT, γT, αT3, γT3	5_206102387	0.11	875602	902017
γT	5_205029060	5	205029060	Zm00001d017713	205042879	205045991	+		Protein NRT1/ PTR FAMILY 8.3	gene	protein_coding		-13819	γT_5	5_205828155	13819	5.81723e-07	0.202948	4785	21.6164	2.00135e-06	86	0.241716	NAM_JL_28	αT, γT, αT3, γT3	5_206102387	0.11	1073327	1056396
γT	5_24456116	5	24456116	Zm00001d013911	24430939	24437600	-		Malic enzyme	gene	protein_coding		25177	γT_3	5_25434949	18516	1.43066e-06	0.084153	2048	9.2519	2.03858e-06	87	0.244526	NAM_JL_24	αT, δT, γT, ΣT, δT3, γT3, ΣTT3	5_25433577	0.89	977461	995977
γT	5_30419814	5	30419814	Zm00001d014043	30420457	30425053	-		PPPDE peptidase domain-containing protein 2	gene	protein_coding		-643			643	2.36219e-06	0.0642127	1558	7.03831	2.53333e-06	88	0.247337	NAM_JL_24	αT, δT, γT, ΣT, δT3, γT3, ΣTT3	5_25433577	0.89	4986237	4986880
γT	1_219324087	1	219324087	Zm00001d032261	219333374	219346185	+		Cyclopropane-fatty-acyl-phospholipid synthase	gene	protein_coding		-9287	γT_1	1_219324087	9287	1.84126e-07	0.890142	19794	89.4199	2.72464e-06	89	0.250148					0
γT	5_24822074	5	24822074	Zm00001d013918	24815087	24817536	+		Thylakoid lumenal 17.4 kDa protein chloroplastic	gene	protein_coding		6987	γT_3	5_25434949	4538	2.08816e-07	0.837289	18723	84.5817	2.89524e-06	90	0.252958	NAM_JL_24	αT, δT, γT, ΣT, δT3, γT3, ΣTT3	5_25433577	0.89	611503	616041
γT	5_24685434	5	24685434	Zm00001d013915	24682234	24685218	+		Glutamyl-tRNA reductase 1 chloroplastic	gene	protein_coding	Yes	3200	γT_3	5_25434949	216	1.78826e-07	1			2.95722e-06	91	0.255769	NAM_JL_24	αT, δT, γT, ΣT, δT3, γT3, ΣTT3	5_25433577	0.89	748143	748359
γT	5_26099903	5	26099903	Zm00001d013955	26101030	26108463	+		Plant basic secretory protein (BSP) family protein	gene	protein_coding		-1127	γT_3	5_25434949	1127	2.06388e-07	1			3.38342e-06	92	0.258579	NAM_JL_24	αT, δT, γT, ΣT, δT3, γT3, ΣTT3	5_25433577	0.89	666326	667453
γT	5_24822074	5	24822074	Zm00001d013919	24817151	24819264	-		Tetratricopeptide repeat (TPR)-like superfamily protein	gene	protein_coding		4923	γT_3	5_25434949	2810	2.08816e-07	1			3.42079e-06	93	0.26139	NAM_JL_24	αT, δT, γT, ΣT, δT3, γT3, ΣTT3	5_25433577	0.89	611503	614313
γT	10_144818591	10	144818591	Zm00001d026382	144818522	144822103	-		G-type lectin S-receptor-like serine/threonine-protein kinase B120	gene	protein_coding		69			within	0.00260824	8.63901e-05	8	0.0361402	3.67411e-06	94	0.264201	NAM_JL_52	δT, γT, ΣT, ΣTT3	10_145879135	0.8	1060544	1057032
γT	1_219284636	1	219284636	Zm00001d032260	219248901	219250308	-		Beta-adaptin-like protein C	gene	protein_coding		35735	γT_1	1_219324087	34328	2.67579e-07	1			4.31708e-06	95	0.267011					0
γT	5_196308655	5	196308655	Zm00001d017454	196309360	196310577	+			gene	protein_coding		-705	γT_5	5_205828155	705	4.14571e-07	0.663423	14923	67.4151	4.42983e-06	96	0.269822	NAM_JL_27	δT			0
γT	5_30561860	5	30561860	Zm00001d014046	30559090	30562350	+	cyclin-dependent kinase inhibitor2	Cyclin-dependent kinase inhibitor 5	gene	protein_coding		2770			within	2.65373e-06	0.107782	2589	11.6959	4.59559e-06	97	0.272633	NAM_JL_24	αT, δT, γT, ΣT, δT3, γT3, ΣTT3	5_25433577	0.89	5128283	5125513
γT	5_24456116	5	24456116	Zm00001d013910	24428231	24432486	+		DEAD-box ATP-dependent RNA helicase 8	gene	protein_coding		27885	γT_3	5_25434949	23630	1.43066e-06	0.218845	5140	23.2201	5.00222e-06	98	0.275443	NAM_JL_24	αT, δT, γT, ΣT, δT3, γT3, ΣTT3	5_25433577	0.89	977461	1001091
γT	5_205295259	5	205295259	Zm00001d017725	205294819	205296713	+		Cell division cycle 20.1 cofactor of APC complex	gene	protein_coding		440	γT_5	5_205828155	within	3.36348e-07	1			5.34966e-06	99	0.278254	NAM_JL_28	αT, γT, αT3, γT3	5_206102387	0.11	807128	805674
γT	5_25964587	5	25964587	Zm00001d013951	26015245	26022791	+		Tetratricopeptide repeat (TPR)-like superfamily protein	gene	protein_coding		-50658	γT_3	5_25434949	50658	6.76801e-07	0.498366	11383	51.423	5.36376e-06	100	0.281065	NAM_JL_24	αT, δT, γT, ΣT, δT3, γT3, ΣTT3	5_25433577	0.89	531010	581668
γT	5_206060781	5	206060781	Zm00001d017761	206061161	206062765	+			gene	protein_coding		-380	γT_5	5_205828155	380	1.24329e-06	0.292607	6793	30.6876	5.75768e-06	101	0.283875	NAM_JL_28	αT, γT, αT3, γT3	5_206102387	0.11	41606	39622
γT	5_24686914	5	24686914	Zm00001d013916	24686332	24686404	-			ncRNA_gene	tRNA		582	γT_3	5_25434949	510	3.7271e-07	1			5.88973e-06	102	0.286686	NAM_JL_24	αT, δT, γT, ΣT, δT3, γT3, ΣTT3	5_25433577	0.89	746663	747173
γT	5_205189809	5	205189809	Zm00001d017721	205190183	205198427	-		Tudor/PWWP/MBT superfamily protein	gene	protein_coding		-374	γT_5	5_205828155	374	1.11391e-06	0.381794	8793	39.7226	6.66443e-06	103	0.289497	NAM_JL_28	αT, γT, αT3, γT3	5_206102387	0.11	912578	903960
γT	5_26678876	5	26678876	Zm00001d013968	26695076	26698413	+		Transcription factor TFIIE alpha subunit	gene	protein_coding		-16200	γT_3	5_25434949	16200	4.30323e-07	1			6.73832e-06	104	0.292307	NAM_JL_24	αT, δT, γT, ΣT, δT3, γT3, ΣTT3	5_25433577	0.89	1245299	1261499
γT	1_220057926	1	220057926	Zm00001d032279	220036840	220043811	-		ABC2 homolog 15	gene	protein_coding		21086	γT_1	1_219324087	14115	1.42652e-06	0.321285	7445	33.633	7.14781e-06	105	0.295118					0
γT	5_24985941	5	24985941	Zm00001d013926	24983948	24987816	+		Formin-like protein 6	gene	protein_coding		1993	γT_3	5_25434949	within	9.35383e-07	0.555	12628	57.0473	8.03163e-06	106	0.297929	NAM_JL_24	αT, δT, γT, ΣT, δT3, γT3, ΣTT3	5_25433577	0.89	447636	445761
γT	5_26061616	5	26061616	Zm00001d013953	26058379	26059046	-			gene	protein_coding		3237	γT_3	5_25434949	2570	5.25926e-07	1			8.12982e-06	107	0.300739	NAM_JL_24	αT, δT, γT, ΣT, δT3, γT3, ΣTT3	5_25433577	0.89	628039	624802
γT	2_215021452	2	215021452	Zm00001d006713	215022021	215022959	+			gene	protein_coding		-569			569	4.59783e-06	0.115375	2741	12.3825	8.19558e-06	108	0.30355					0
γT	5_26224065	5	26224065	Zm00001d013958	26237325	26241411	-			gene	protein_coding		-13260			13260	3.48994e-05	0.0153411	406	1.83412	8.26666e-06	109	0.30636	NAM_JL_24	αT, δT, γT, ΣT, δT3, γT3, ΣTT3	5_25433577	0.89	790488	803748
γT	5_26657231	5	26657231	Zm00001d013967	26610074	26621214	-		Myosin-3	gene	protein_coding		47157	γT_3	5_25434949	36017	1.19137e-06	0.463262	10569	47.7458	8.50494e-06	110	0.309171	NAM_JL_24	αT, δT, γT, ΣT, δT3, γT3, ΣTT3	5_25433577	0.89	1223654	1176497
γT	6_131359162	6	131359162	Zm00001d037604	131348955	131353566	-		Ethylene response sensor 1	gene	protein_coding		10207			5596	0.000233806	0.00236655	73	0.32978	8.5251e-06	111	0.311982	NAM_JL_32	αT, γT3, ΣT3, ΣTT3			0
γT	1_279984235	1	279984235	Zm00001d033981	279982395	279986186	-	ATP sulfurylase1	ATP sulfurylase1	gene	protein_coding		1840			within	0.00120399	0.000482654	21	0.0948681	8.92493e-06	112	0.314792					0
γT	5_190059571	5	190059571	Zm00001d017241	190060998	190063941	+		Two-component response regulator-like APRR1	gene	protein_coding		-1427			1427	2.29498e-05	0.0258974	706	3.18937	9.11469e-06	113	0.317603					0
γT	5_204976620	5	204976620	Zm00001d017712	204965594	204969901	+	WRKY-transcription factor 46	Probable WRKY transcription factor 14	gene	protein_coding		11026	γT_5	5_205828155	6719	6.0058e-07	1			9.20411e-06	114	0.320414	NAM_JL_28	αT, γT, αT3, γT3	5_206102387	0.11	1125767	1132486
γT	5_25913783	5	25913783	Zm00001d013950	25864653	25865518	-		Plant basic secretory protein (BSP) family protein	gene	protein_coding		49130	γT_3	5_25434949	48265	6.62516e-07	1			1.00883e-05	115	0.323224	NAM_JL_24	αT, δT, γT, ΣT, δT3, γT3, ΣTT3	5_25433577	0.89	480206	431076
γT	9_108881070	9	108881070	Zm00001d046887	108878757	108880778	+		NC domain-containing protein-related	gene	protein_coding		2313			292	7.13469e-07	1			1.08113e-05	116	0.326035					0
γT	7_8495030	7	8495030	Zm00001d018891	8478320	8494304	-	chloroplast RNA processing4	chloroplast RNA processing4	gene	protein_coding		16710			726	0.00531017	0.000138432	10	0.0451753	1.1117e-05	117	0.328846					0
γT	5_90124982	5	90124982	Zm00001d015436	90084488	90084916	-			gene	protein_coding		40494	γT_4	5_90124982	40066	8.4856e-07	1			1.27112e-05	118	0.331656	NAM_JL_26	δT, γT, ΣT, δT3, γT3, ΣT3, ΣTT3	5_95842646	0.14	5717664	5757730
γT	1_219185233	1	219185233	Zm00001d032256	219157413	219174593	-		Dynamin-2A	gene	protein_coding		27820	γT_1	1_219324087	10640	1.10083e-06	0.775046	17387	78.5463	1.2776e-05	119	0.334467					0
γT	5_168180636	5	168180636	Zm00001d016581	168223687	168255407	+		DNA polymerase epsilon catalytic subunit A	gene	protein_coding		-43051			43051	0.0200981	4.26206e-05	7	0.0316227	1.28235e-05	120	0.337278					0
γT	5_25112000	5	25112000	Zm00001d013931	25111416	25112574	+	MYB-transcription factor 102	Transcription factor MYB36	gene	protein_coding		584	γT_3	5_25434949	within	8.77327e-07	1			1.31129e-05	121	0.340088	NAM_JL_24	αT, δT, γT, ΣT, δT3, γT3, ΣTT3	5_25433577	0.89	321577	321003
γT	3_216716469	3	216716469	Zm00001d044017	216717307	216725476	-		Probable plastid-lipid-associated protein 14 chloroplastic	gene	protein_coding		-838			838	0.0586172	1.50746e-05	6	0.0271052	1.32007e-05	122	0.342899					0
γT	10_112156842	10	112156842	Zm00001d025274	112165803	112168114	+			gene	protein_coding		-8961			8961	0.000158209	0.00582957	172	0.777015	1.37388e-05	123	0.34571	NAM_JL_51	αT3, ΣT3			0
γT	3_217576761	3	217576761	Zm00001d044042	217573164	217581039	+	malate dehydrogenase3	malate dehydrogenase3	gene	protein_coding		3597			within	0.00375554	0.00024569	14	0.0632454	1.37445e-05	124	0.34852					0
γT	10_23886062	10	23886062	Zm00001d023838	23887314	23897377	-		Auxilin-related protein 1	gene	protein_coding		-1252			1252	0.000705704	0.00132815	45	0.203289	1.3947e-05	125	0.351331	NAM_JL_49	γT, ΣT, δT3, γT3, ΣTT3	10_19673358	0.48	4212704	4213956
γT	5_26325477	5	26325477	Zm00001d013960	26332091	26335998	+		ATP-binding cassette sub-family G member 2	gene	protein_coding		-6614	γT_3	5_25434949	6614	1.89584e-06	0.512678	11721	52.9499	1.44277e-05	126	0.354141	NAM_JL_24	αT, δT, γT, ΣT, δT3, γT3, ΣTT3	5_25433577	0.89	891900	898514
γT	5_204749890	5	204749890	Zm00001d017707	204745661	204751145	+		P-loop containing nucleoside triphosphate hydrolases superfamily protein	gene	protein_coding		4229			within	1.21255e-05	0.0828267	2016	9.10734	1.48752e-05	127	0.356952	NAM_JL_28	αT, γT, αT3, γT3	5_206102387	0.11	1352497	1351242
γT	5_90213557	5	90213557	Zm00001d015437	90212611	90212916	-			gene	protein_coding		946	γT_4	5_90124982	641	1.02912e-06	1			1.52173e-05	128	0.359763	NAM_JL_26	δT, γT, ΣT, δT3, γT3, ΣT3, ΣTT3	5_95842646	0.14	5629089	5629730
γT	8_166895063	8	166895063	Zm00001d012034	166861044	166902381	+		N-acetylglucosaminyl transferase component family protein / Gpi1 family protein	gene	protein_coding		34019			within	0.000127302	0.00828208	241	1.08872	1.55646e-05	129	0.362573					0
γT	5_203295370	5	203295370	Zm00001d017656	203295312	203302352	+		Uncharacterized enzyme involved in pigment biosynthesis	gene	protein_coding		58			within	0.000390773	0.00270974	85	0.38399	1.56275e-05	130	0.365384					0
γT	5_204690763	5	204690763	Zm00001d017704	204688990	204692437	+		Target of Myb protein 1	gene	protein_coding		1773			within	1.35369e-05	0.0792838	1911	8.633	1.5825e-05	131	0.368195	NAM_JL_28	αT, γT, αT3, γT3	5_206102387	0.11	1411624	1409950
γT	2_214893763	2	214893763	Zm00001d006708	214892586	214893899	+		C2 domain containing protein	gene	protein_coding		1177			within	6.58867e-05	0.0165273	447	2.01934	1.60403e-05	132	0.371005					0
γT	1_216285518	1	216285518	Zm00001d032188	216280294	216286285	+		Probable mannan synthase 7	gene	protein_coding		5224			within	0.000291333	0.00377038	121	0.546621	1.61708e-05	133	0.373816					0
γT	5_196375897	5	196375897	Zm00001d017456	196421600	196439701	+	ypt homolog4	ypt homolog4	gene	protein_coding		-45703			45703	4.36683e-06	0.25168	5871	26.5224	1.61791e-05	134	0.376627	NAM_JL_27	δT			0
γT	5_205087879	5	205087879	Zm00001d017718	205088109	205091684	+			gene	protein_coding		-230			230	1.17736e-05	0.0972241	2349	10.6117	1.68044e-05	135	0.379437	NAM_JL_28	αT, γT, αT3, γT3	5_206102387	0.11	1014508	1010703
γT	4_179541835	4	179541835	Zm00001d052101	179536713	179538773	+	chaperonin10	chaperonin10	gene	protein_coding		5122			3062	0.000102263	0.0111958	316	1.42754	1.68077e-05	136	0.382248					0
γT	1_103283380	1	103283380	Zm00001d030069	103280320	103286276	-	outer cell layer4	Homeodomain leucine zipper family IV protein	gene	protein_coding		3060			within	0.000131033	0.00912995	265	1.19714	1.75097e-05	137	0.385059	NAM_JL_4	δT, δT3, γT3, ΣT3, ΣTT3			0
γT	5_205124171	5	205124171	Zm00001d017719	205105870	205106370	+		60S ribosomal protein L12-3	gene	protein_coding		18301	γT_5	5_205828155	17801	1.64887e-06	0.760062	17048	77.0148	1.82845e-05	138	0.387869	NAM_JL_28	αT, γT, αT3, γT3	5_206102387	0.11	978216	996017
γT	5_30194303	5	30194303	Zm00001d014038	30230017	30235454	-		Casein kinase 1-like protein 6	gene	protein_coding		-35714			35714	1.71229e-06	0.737188	16518	74.6205	1.84073e-05	139	0.39068	NAM_JL_24	αT, δT, γT, ΣT, δT3, γT3, ΣTT3	5_25433577	0.89	4760726	4796440
γT	1_17427413	1	17427413	Zm00001d027915	17406705	17409156	-		Topless-related protein 2	gene	protein_coding		20708			18257	1.30207e-06	1			1.89472e-05	140	0.393491	NAM_JL_2	γT, δT3	1_14035405	0.21	3392008	3371300
γT	5_90264119	5	90264119	Zm00001d015440	90267647	90277773	-			gene	protein_coding		-3528	γT_4	5_90124982	3528	1.30221e-06	1			1.8949e-05	141	0.396301	NAM_JL_26	δT, γT, ΣT, δT3, γT3, ΣT3, ΣTT3	5_95842646	0.14	5578527	5564873
γT	4_226776	4	226776	Zm00001d048584	220589	221098	+		Thioesterase family protein	gene	protein_coding		6187			5678	0.000125073	0.0105274	298	1.34622	1.91452e-05	142	0.399112					0
γT	5_204911275	5	204911275	Zm00001d017711	204910256	204912526	+		Phosphoribulokinase	gene	protein_coding		1019	γT_5	5_205828155	within	1.33923e-06	1			1.94502e-05	143	0.401922	NAM_JL_28	αT, γT, αT3, γT3	5_206102387	0.11	1191112	1189861
γT	8_19032800	8	19032800	Zm00001d008752	18999372	19006082	-		Calcium-dependent lipid-binding (CaLB domain) family protein	gene	protein_coding		33428			26718	0.0128475	0.000105046	9	0.0406578	1.95901e-05	144	0.404733					0
γT	5_21507201	5	21507201	Zm00001d013827	21505251	21508854	+	MYB-related-transcription factor 99	TRF-like 5	gene	protein_coding		1950	γT_3	5_25434949	within	2.11177e-06	0.640811	14456	65.3054	1.96397e-05	145	0.407544	NAM_JL_24	αT, δT, γT, ΣT, δT3, γT3, ΣTT3	5_25433577	0.89	3926376	3924723
γT	6_119271685	6	119271685	Zm00001d037279	119259106	119268023	+		Dynamin-2A	gene	protein_coding		12579			3662	4.73348e-05	0.0286744	763	3.44687	1.96944e-05	146	0.410354	NAM_JL_31	δT, γT, ΣT, αT3, δT3, ΣTT3	6_122117097	0.23	2845412	2849074
γT	5_206197570	5	206197570	Zm00001d017765	206195445	206198744	+		WAT1-related protein	gene	protein_coding		2125			within	5.59202e-06	0.243541	5680	25.6596	1.97564e-05	147	0.413165	NAM_JL_28	αT, γT, αT3, γT3	5_206102387	0.11	95183	93058
γT	5_24409535	5	24409535	Zm00001d013908	24406779	24412871	-		Myosin heavy chain-related protein	gene	protein_coding		2756			within	4.92926e-05	0.0277248	745	3.36556	1.98205e-05	148	0.415976	NAM_JL_24	αT, δT, γT, ΣT, δT3, γT3, ΣTT3	5_25433577	0.89	1024042	1020706
γT	1_286390382	1	286390382	Zm00001d034198	286411877	286413004	+		Protein PHLOEM PROTEIN 2-LIKE A10	gene	protein_coding		-21495			21495	0.000329746	0.00415529	131	0.591796	1.98685e-05	149	0.418786					0
γT	5_21676722	5	21676722	Zm00001d013828	21546382	21565664	+		Switch 2	gene	protein_coding		130340			111058	1.49527e-05	0.0937336	2261	10.2141	2.02918e-05	150	0.421597	NAM_JL_24	αT, δT, γT, ΣT, δT3, γT3, ΣTT3	5_25433577	0.89	3756855	3867913
γT	5_30368253	5	30368253	Zm00001d014040	30334720	30342720	-		WD repeat-containing protein 91-like protein	gene	protein_coding		33533			25533	3.52304e-05	0.0415662	1038	4.68919	2.11372e-05	151	0.424408	NAM_JL_24	αT, δT, γT, ΣT, δT3, γT3, ΣTT3	5_25433577	0.89	4934676	4901143
γT	5_26280501	5	26280501	Zm00001d013959	26293309	26294683	+			gene	protein_coding		-12808	γT_3	5_25434949	12808	1.49107e-06	1			2.14952e-05	152	0.427218	NAM_JL_24	αT, δT, γT, ΣT, δT3, γT3, ΣTT3	5_25433577	0.89	846924	859732
γT	4_148899179	4	148899179	Zm00001d051214	148918694	148925044	+	nitrilase2	nitrilase2	gene	protein_coding		-19515			19515	0.000143084	0.0105863	299	1.35074	2.18125e-05	153	0.430029	NAM_JL_21	δT, γT, ΣT, αT3, δT3, γT3, ΣT3, ΣTT3	4_30887160	0.24	118012019	118031534
γT	2_226694138	2	226694138	Zm00001d007279	226688336	226698541	+		La-related protein 6B	gene	protein_coding		5802			within	0.000984865	0.00156152	48	0.216841	2.21226e-05	154	0.43284	NAM_JL_12	αT, δT, γT, ΣT, ΣTT3	2_216530125	0.32	10164013	10158211
γT	5_33217546	5	33217546	Zm00001d014123	33202990	33204555	+		peroxidase 13	gene	protein_coding		14556			12991	1.55459e-06	1			2.23461e-05	155	0.43565					0
γT	2_190349096	2	190349096	Zm00001d005833	190344608	190350123	+		Protein Brevis radix-like 4	gene	protein_coding		4488			within	0.00333979	0.00046828	20	0.0903506	2.24713e-05	156	0.438461	NAM_JL_11	γT, ΣT, ΣTT3	2_202051918	0.35	11702822	11701795
γT	8_17875989	8	17875989	Zm00001d008724	17871316	17876968	-		Protein NSP-INTERACTING KINASE 3	gene	protein_coding		4673			within	0.000821331	0.00193239	58	0.262017	2.2781e-05	157	0.441272					0
γT	8_17627297	8	17627297	Zm00001d008716	17623710	17628383	-		NEP-interacting protein 1	gene	protein_coding		3587			within	1.91719e-06	0.833343	18635	84.1841	2.29218e-05	158	0.444082					0
γT	2_76043464	2	76043464	Zm00001d004019	76032746	76036570	+	stearoyl-acyl-carrier-protein desaturase5	stearoyl-acyl-carrier-protein desaturase5	gene	protein_coding		10718			6894	0.00474949	0.000336435	15	0.0677629	2.29248e-05	159	0.446893	NAM_JL_10	δT, γT, αT3, γT3, ΣT3			0
γT	4_240922569	4	240922569	Zm00001d053778	240939248	240942799	+		Cell division control protein 50	gene	protein_coding		-16679			16679	0.00159303	0.00103832	36	0.162631	2.36735e-05	160	0.449703					0
γT	3_182844453	3	182844453	Zm00001d042884	182846757	182851933	-		Acyl-coenzyme A oxidase	gene	protein_coding		-2304			2304	0.000259144	0.00703881	206	0.930611	2.59281e-05	161	0.452514	NAM_JL_17	ΣTT3			0
γT	5_29927578	5	29927578	Zm00001d014035	29983511	29986762	+		Pentatricopeptide repeat-containing protein mitochondrial	gene	protein_coding		-55933			55933	3.5163e-05	0.0522976	1294	5.84568	2.61246e-05	162	0.455325	NAM_JL_24	αT, δT, γT, ΣT, δT3, γT3, ΣTT3	5_25433577	0.89	4494001	4549934
γT	5_33235307	5	33235307	Zm00001d014124	33239071	33244411	-		Cell division cycle protein 48	gene	protein_coding		-3764			3764	8.41189e-06	0.218617	5131	23.1794	2.61252e-05	163	0.458135					0
γT	2_181388477	2	181388477	Zm00001d005636	181459859	181465569	+		Proton pump-interactor 1	gene	protein_coding		-71382			71382	9.94226e-05	0.0196822	538	2.43043	2.76781e-05	164	0.460946					0
γT	5_206347024	5	206347024	Zm00001d017771	206343101	206346122	-		Isoflavone reductase	gene	protein_coding		3923	γT_5	5_205828155	902	2.85847e-06	0.691542	15527	70.1437	2.79396e-05	165	0.463757	NAM_JL_28	αT, γT, αT3, γT3	5_206102387	0.11	244637	240714
γT	5_19147354	5	19147354	Zm00001d013746	19171913	19174748	+			gene	protein_coding		-24559			24559	5.76996e-06	0.348696	8016	36.2125	2.84017e-05	166	0.466567	NAM_JL_24	αT, δT, γT, ΣT, δT3, γT3, ΣTT3	5_25433577	0.89	6286223	6258829
γT	1_259496688	1	259496688	Zm00001d033337	259493012	259496396	+		Protein OSB1 mitochondrial	gene	protein_coding		3676			292	0.000252562	0.00801162	235	1.06162	2.85521e-05	167	0.469378	NAM_JL_6	αT3			0
γT	5_30307615	5	30307615	Zm00001d014039	30288982	30292232	-		non-intrinsic ABC protein 4	gene	protein_coding		18633			15383	3.03494e-05	0.0668116	1639	7.40423	2.86079e-05	168	0.472189	NAM_JL_24	αT, δT, γT, ΣT, δT3, γT3, ΣTT3	5_25433577	0.89	4874038	4855405
γT	1_303932917	1	303932917	Zm00001d034858	303927049	303933356	+		Inactive protein FRIGIDA	gene	protein_coding		5868			within	5.29759e-05	0.0385996	972	4.39104	2.88327e-05	169	0.474999					0
γT	5_29771134	5	29771134	Zm00001d014033	29808369	29824010	-		Transportin MOS14	gene	protein_coding		-37235			37235	6.83666e-06	0.302719	7014	31.6859	2.91567e-05	170	0.47781	NAM_JL_24	αT, δT, γT, ΣT, δT3, γT3, ΣTT3	5_25433577	0.89	4337557	4374792
γT	3_193237370	3	193237370	Zm00001d043249	193232903	193236532	-		NAD(P)H dehydrogenase (quinone) FQR1	gene	protein_coding		4467			838	0.0011864	0.00176298	54	0.243947	2.94447e-05	171	0.480621	NAM_JL_18	αT, γT, ΣT, δT3	3_197021759	0.12	3784389	3785227
γT	9_119473874	9	119473874	Zm00001d047130	119474567	119477638	+		Translocase of chloroplast 120 chloroplastic	gene	protein_coding		-693			693	5.30581e-06	0.397123	9141	41.2947	2.96468e-05	172	0.483431					0
γT	2_19213481	2	19213481	Zm00001d002685	19212994	19214316	-		Thioredoxin-like 3-3	gene	protein_coding		487			within	0.00922786	0.000238125	13	0.0587279	3.08254e-05	173	0.486242					0
γT	5_206877963	5	206877963	Zm00001d017788	206876258	206880405	-	C2C2-Dof-transcription factor 29	Dof zinc finger protein DOF2.1	gene	protein_coding		1705			within	3.26325e-06	0.703908	15783	71.3001	3.21214e-05	174	0.489053					0
γT	8_14302172	8	14302172	Zm00001d008604	14284242	14291436	+		Protein NRT1/ PTR FAMILY 8.1	gene	protein_coding		17930			10736	0.000182534	0.0128984	351	1.58565	3.28657e-05	175	0.491863					0
γT	6_21024265	6	21024265	Zm00001d035317	21025043	21027063	+			gene	protein_coding		-778			778	5.87853e-06	0.401607	9237	41.7284	3.29493e-05	176	0.494674					0
γT	2_216363049	2	216363049	Zm00001d006771	216363908	216366486	+		RNA-binding (RRM/RBD/RNP motifs) family protein	gene	protein_coding		-859			859	5.7489e-05	0.0412372	1029	4.64854	3.30766e-05	177	0.497484	NAM_JL_12	αT, δT, γT, ΣT, ΣTT3	2_216530125	0.32	167076	163639
γT3	9_95924532	9	95924532	Zm00001d046558	95895575	95899061	+	homogentisate geranylgeranyl transferase1	homogentisate geranylgeranyl transferase1	gene	protein_coding	Yes	28957	γT3_6	9_95963918	25471	3.32594e-22	3.77576e-11	1	0.00451753	9.35001e-31	1	0.00283094	NAM_JL_45	αT, δT, γT, ΣT, αT3, δT3, γT3, ΣT3, ΣTT3	9_95962596	0.98	38064	63535
γT3	9_95963918	9	95963918	Zm00001d046560	95961757	95965827	+		ATPase 8 plasma membrane-type	gene	protein_coding		2161	γT3_6	9_95963918	within	1.48807e-26	1			8.99832e-25	2	0.00566187	NAM_JL_45	αT, δT, γT, ΣT, αT3, δT3, γT3, ΣT3, ΣTT3	9_95962596	0.98	1322	within
γT3	9_95930517	9	95930517	Zm00001d046559	95956438	95960560	-			gene	protein_coding		-25921	γT3_6	9_95963918	25921	4.18561e-19	1			1.8131e-17	3	0.00849281	NAM_JL_45	αT, δT, γT, ΣT, αT3, δT3, γT3, ΣT3, ΣTT3	9_95962596	0.98	32079	2036
γT3	9_95827231	9	95827231	Zm00001d046555	95832622	95834867	-	embryo specific18	embryo specific18	gene	protein_coding		-5391	γT3_6	9_95963918	5391	2.29612e-15	0.000232487	15	0.0677629	2.29937e-17	4	0.0113237	NAM_JL_45	αT, δT, γT, ΣT, αT3, δT3, γT3, ΣT3, ΣTT3	9_95962596	0.98	135365	127729
γT3	9_95330126	9	95330126	Zm00001d046549	95423390	95429102	-		110 kDa U5 small nuclear ribonucleoprotein component CLO	gene	protein_coding		-93264	γT3_6	9_95963918	93264	4.46928e-16	0.00277703	169	0.763462	5.24137e-17	5	0.0141547	NAM_JL_45	αT, δT, γT, ΣT, αT3, δT3, γT3, ΣT3, ΣTT3	9_95962596	0.98	632470	533494
γT3	9_97093459	9	97093459	Zm00001d046582	97130617	97158426	-			gene	protein_coding		-37158	γT3_6	9_95963918	37158	3.13395e-18	1			1.29445e-16	6	0.0169856	NAM_JL_45	αT, δT, γT, ΣT, αT3, δT3, γT3, ΣT3, ΣTT3	9_95962596	0.98	1130863	1168021
γT3	9_96083028	9	96083028	Zm00001d046564	96085990	96091648	+	bZIP-transcription factor 93	Putative bZIP transcription factor superfamily protein [Source:UniProtKB/TrEMBL%3BAcc:B7ZYA0]	gene	protein_coding		-2962	γT3_6	9_95963918	2962	1.90541e-17	0.468015	11319	51.1339	3.59009e-16	7	0.0198166	NAM_JL_45	αT, δT, γT, ΣT, αT3, δT3, γT3, ΣT3, ΣTT3	9_95962596	0.98	120432	123394
γT3	9_96811373	9	96811373	Zm00001d046579	96779812	96809887	+		Transcription initiation factor TFIID subunit 1	gene	protein_coding		31561	γT3_6	9_95963918	1486	1.23861e-17	0.842466	18978	85.7336	4.18453e-16	8	0.0226475	NAM_JL_45	αT, δT, γT, ΣT, αT3, δT3, γT3, ΣT3, ΣTT3	9_95962596	0.98	848777	817216
γT3	5_86085552	5	86085552	Zm00001d015356	86084655	86086755	-	4-hydroxyphenylpyruvate dioxygenase 1	4-hydroxyphenylpyruvate dioxygenase 1	gene	protein_coding	Yes	897	γT3_3	5_86085552	within	2.50638e-15	0.00685443	324	1.46368	6.80368e-16	9	0.0254784	NAM_JL_26	δT, γT, ΣT, δT3, γT3, ΣT3, ΣTT3	5_86090066	0.7	4514	3311
γT3	9_95057149	9	95057149	Zm00001d046543	95052868	95052940	+			ncRNA_gene	tRNA		4281	γT3_6	9_95963918	4209	3.55426e-17	1			1.38175e-15	10	0.0283094	NAM_JL_45	αT, δT, γT, ΣT, αT3, δT3, γT3, ΣT3, ΣTT3	9_95962596	0.98	905447	909656
γT3	9_95230645	9	95230645	Zm00001d046545	95156721	95195559	-			gene	protein_coding		73924	γT3_6	9_95963918	35086	6.26671e-17	0.634273	14728	66.5342	1.54079e-15	11	0.0311403	NAM_JL_45	αT, δT, γT, ΣT, αT3, δT3, γT3, ΣT3, ΣTT3	9_95962596	0.98	731951	767037
γT3	5_206007707	5	206007707	Zm00001d017756	206004272	206007539	-		Syntaxin-22	gene	protein_coding		3435	γT3_4	5_205853870	168	4.55142e-14	0.00130462	85	0.38399	2.27792e-15	12	0.0339712	NAM_JL_28	αT, γT, αT3, γT3	5_205824621	0.55	183086	179651
γT3	9_95766888	9	95766888	Zm00001d046554	95762282	95767578	-		Copine-1%253B Copine-1 isoform 1%253B Copine-1 isoform 2	gene	protein_coding		4606	γT3_6	9_95963918	within	8.6716e-16	0.129682	3711	16.7645	4.24226e-15	13	0.0368022	NAM_JL_45	αT, δT, γT, ΣT, αT3, δT3, γT3, ΣT3, ΣTT3	9_95962596	0.98	195708	195018
γT3	5_205853870	5	205853870	Zm00001d017748	205851491	205853476	+		3-dehydrosphinganine reductase TSC10B	gene	protein_coding		2379	γT3_4	5_205853870	394	1.46101e-16	0.943853	21051	95.0985	5.17394e-15	14	0.0396331	NAM_JL_28	αT, γT, αT3, γT3	5_205824621	0.55	29249	26870
γT3	5_205890736	5	205890736	Zm00001d017752	205893484	205894854	-		Transcription factor GT-3b	gene	protein_coding		-2748	γT3_4	5_205853870	2748	1.07167e-15	0.151606	4235	19.1317	6.06928e-15	15	0.042464	NAM_JL_28	αT, γT, αT3, γT3	5_205824621	0.55	66115	68863
γT3	9_96226187	9	96226187	Zm00001d046568	96269799	96278036	+	knotted related homeobox2	knotted related homeobox2	gene	protein_coding		-43612	γT3_6	9_95963918	43612	6.10359e-16	0.371528	9207	41.5929	8.39546e-15	16	0.045295	NAM_JL_45	αT, δT, γT, ΣT, αT3, δT3, γT3, ΣT3, ΣTT3	9_95962596	0.98	263591	307203
γT3	9_94385305	9	94385305	Zm00001d046533	94356499	94362871	+		nucleoporin-related	gene	protein_coding		28806	γT3_6	9_95963918	22434	3.24974e-16	0.702471	16099	72.7277	8.45019e-15	17	0.0481259	NAM_JL_45	αT, δT, γT, ΣT, αT3, δT3, γT3, ΣT3, ΣTT3	9_95962596	0.98	1577291	1599725
γT3	5_205890736	5	205890736	Zm00001d017751	205889941	205895577	+	organelle transcript processing51	Pentatricopeptide repeat-containing protein chloroplastic	gene	protein_coding		795	γT3_4	5_205853870	within	1.07167e-15	0.894875	20003	90.3641	3.41221e-14	18	0.0509569	NAM_JL_28	αT, γT, αT3, γT3	5_205824621	0.55	66115	65320
γT3	5_205830095	5	205830095	Zm00001d017746	205825586	205829216	+	vitamin E synthesis4	vitamin E synthesis4	gene	protein_coding	Yes	4509	γT3_4	5_205853870	879	3.01795e-12	0.000350115	25	0.112938	3.74932e-14	19	0.0537878	NAM_JL_28	αT, γT, αT3, γT3	5_205824621	0.55	5474	965
γT3	9_94904467	9	94904467	Zm00001d046542	94885059	94885415	+			gene	protein_coding		19408	γT3_6	9_95963918	19052	1.53297e-15	1			5.38249e-14	20	0.0566187	NAM_JL_45	αT, δT, γT, ΣT, αT3, δT3, γT3, ΣT3, ΣTT3	9_95962596	0.98	1058129	1077181
γT3	9_96538941	9	96538941	Zm00001d046574	96556993	96557319	-			gene	protein_coding		-18052	γT3_6	9_95963918	18052	4.48049e-15	0.639089	14807	66.891	9.87504e-14	21	0.0594497	NAM_JL_45	αT, δT, γT, ΣT, αT3, δT3, γT3, ΣT3, ΣTT3	9_95962596	0.98	576345	594397
γT3	9_94523586	9	94523586	Zm00001d046535	94503734	94505652	+		Phosphatidylcholine:diacylglycerol cholinephosphotransferase 1	gene	protein_coding		19852	γT3_6	9_95963918	17934	4.10896e-12	0.000705352	47	0.212324	9.99166e-14	22	0.0622806	NAM_JL_45	αT, δT, γT, ΣT, αT3, δT3, γT3, ΣT3, ΣTT3	9_95962596	0.98	1439010	1456944
γT3	9_97280859	9	97280859	Zm00001d027142	97239863	97240233	+			ncRNA_gene	lincRNA		40996	γT3_6	9_95963918	40626	4.93418e-15	1			1.67479e-13	23	0.0651115	NAM_JL_45	αT, δT, γT, ΣT, αT3, δT3, γT3, ΣT3, ΣTT3	9_95962596	0.98	1318263	1277267
γT3	9_95476438	9	95476438	Zm00001d027141	95504913	95505404	-			ncRNA_gene	lincRNA		-28475	γT3_6	9_95963918	28475	6.40728e-15	1			2.15806e-13	24	0.0679425	NAM_JL_45	αT, δT, γT, ΣT, αT3, δT3, γT3, ΣT3, ΣTT3	9_95962596	0.98	486158	457192
γT3	9_95967313	9	95967313	Zm00001d046561	95968172	95971622	-		Protein kinase superfamily protein	gene	protein_coding		-859	γT3_6	9_95963918	859	1.53209e-12	0.0156411	622	2.8099	7.75515e-13	25	0.0707734	NAM_JL_45	αT, δT, γT, ΣT, αT3, δT3, γT3, ΣT3, ΣTT3	9_95962596	0.98	4717	5576
γT3	9_97430648	9	97430648	Zm00001d046587	97428880	97438298	-		transducin family protein / WD-40 repeat family protein	gene	protein_coding		1768	γT3_6	9_95963918	within	1.11406e-12	0.0285616	1046	4.72533	1.02073e-12	26	0.0736043	NAM_JL_45	αT, δT, γT, ΣT, αT3, δT3, γT3, ΣT3, ΣTT3	9_95962596	0.98	1468052	1466284
γT3	9_96176511	9	96176511	Zm00001d046566	96094106	96097864	-		Nuclear pore complex protein NUP96	gene	protein_coding		82405	γT3_6	9_95963918	78647	1.21852e-13	1			3.74523e-12	27	0.0764353	NAM_JL_45	αT, δT, γT, ΣT, αT3, δT3, γT3, ΣT3, ΣTT3	9_95962596	0.98	213915	131510
γT3	9_97454721	9	97454721	Zm00001d046590	97452571	97463456	-		Protein S-acyltransferase 24	gene	protein_coding		2150	γT3_6	9_95963918	within	1.11406e-12	0.113032	3274	14.7904	3.86628e-12	28	0.0792662	NAM_JL_45	αT, δT, γT, ΣT, αT3, δT3, γT3, ΣT3, ΣTT3	9_95962596	0.98	1492125	1489975
γT3	9_95762025	9	95762025	Zm00001d046553	95755367	95762132	+		Fructose-bisphosphate aldolase 7 cytosolic	gene	protein_coding		6658	γT3_6	9_95963918	within	1.33502e-12	0.134833	3823	17.2705	5.46237e-12	29	0.0820972	NAM_JL_45	αT, δT, γT, ΣT, αT3, δT3, γT3, ΣT3, ΣTT3	9_95962596	0.98	200571	200464
γT3	9_96012482	9	96012482	Zm00001d046563	96016421	96018174	+			gene	protein_coding		-3939	γT3_6	9_95963918	3939	3.4594e-13	1			1.02718e-11	30	0.0849281	NAM_JL_45	αT, δT, γT, ΣT, αT3, δT3, γT3, ΣT3, ΣTT3	9_95962596	0.98	49886	53825
γT3	9_93868450	9	93868450	Zm00001d027140	93916559	93917433	-			ncRNA_gene	lincRNA		-48109	γT3_6	9_95963918	48109	4.6821e-13	1			1.37606e-11	31	0.087759	NAM_JL_45	αT, δT, γT, ΣT, αT3, δT3, γT3, ΣT3, ΣTT3	9_95962596	0.98	2094146	2045163
γT3	9_97774316	9	97774316	Zm00001d046595	97773604	97780433	+		Putative sucrose-phosphate synthase family protein	gene	protein_coding		712	γT3_6	9_95963918	within	9.59057e-12	0.0582993	1913	8.64203	1.63334e-11	32	0.09059	NAM_JL_45	αT, δT, γT, ΣT, αT3, δT3, γT3, ΣT3, ΣTT3	9_95962596	0.98	1811720	1811008
γT3	9_97430648	9	97430648	Zm00001d046588	97435933	97436004	-			ncRNA_gene	tRNA		-5285	γT3_6	9_95963918	5285	1.11406e-12	1			3.17764e-11	33	0.0934209	NAM_JL_45	αT, δT, γT, ΣT, αT3, δT3, γT3, ΣT3, ΣTT3	9_95962596	0.98	1468052	1473337
γT3	9_97231474	9	97231474	Zm00001d046583	97236468	97238511	-		40S ribosomal protein S14	gene	protein_coding		-4994	γT3_6	9_95963918	4994	3.24646e-12	0.711619	16309	73.6764	6.42102e-11	34	0.0962518	NAM_JL_45	αT, δT, γT, ΣT, αT3, δT3, γT3, ΣT3, ΣTT3	9_95962596	0.98	1268878	1273872
γT3	9_94743655	9	94743655	Zm00001d046539	94817071	94823847	+		26S protease regulatory subunit S10B homolog B	gene	protein_coding		-73416	γT3_6	9_95963918	73416	5.21584e-12	0.766784	17419	78.6908	1.08964e-10	35	0.0990828	NAM_JL_45	αT, δT, γT, ΣT, αT3, δT3, γT3, ΣT3, ΣTT3	9_95962596	0.98	1218941	1138749
γT3	9_97922225	9	97922225	Zm00001d046597	97931274	97932234	-			gene	protein_coding		-9049	γT3_6	9_95963918	9049	6.6257e-12	1			1.77172e-10	36	0.101914	NAM_JL_45	αT, δT, γT, ΣT, αT3, δT3, γT3, ΣT3, ΣTT3	9_95962596	0.98	1959629	1968678
γT3	9_94218715	9	94218715	Zm00001d046531	94211896	94217211	-		Protein WVD2-like 5	gene	protein_coding		6819	γT3_6	9_95963918	1504	3.73388e-11	0.340705	8565	38.6926	3.31876e-10	37	0.104745	NAM_JL_45	αT, δT, γT, ΣT, αT3, δT3, γT3, ΣT3, ΣTT3	9_95962596	0.98	1743881	1745385
γT3	9_96925124	9	96925124	Zm00001d046581	96875104	96896745	-		Isoleucine--tRNA ligase cytoplasmic	gene	protein_coding		50020	γT3_6	9_95963918	28379	1.29408e-10	0.0992434	2948	13.3177	3.34919e-10	38	0.107576	NAM_JL_45	αT, δT, γT, ΣT, αT3, δT3, γT3, ΣT3, ΣTT3	9_95962596	0.98	962528	912508
γT3	9_92153783	9	92153783	Zm00001d046489	92154833	92157937	-			gene	protein_coding		-1050	γT3_6	9_95963918	1050	1.68487e-08	0.00127882	83	0.374955	5.50746e-10	39	0.110407	NAM_JL_45	αT, δT, γT, ΣT, αT3, δT3, γT3, ΣT3, ΣTT3	9_95962596	0.98	3808813	3804659
γT3	9_98840183	9	98840183	Zm00001d046613	98839260	98845509	+		Elongator complex protein 4	gene	protein_coding		923	γT3_6	9_95963918	within	1.36217e-07	0.000206322	13	0.0587279	7.10906e-10	40	0.113237	NAM_JL_45	αT, δT, γT, ΣT, αT3, δT3, γT3, ΣT3, ΣTT3	9_95962596	0.98	2877587	2876664
γT3	9_94716481	9	94716481	Zm00001d046538	94662146	94667640	-		Sec14p-like phosphatidylinositol transfer family protein	gene	protein_coding		54335	γT3_6	9_95963918	48841	1.31034e-09	0.0401044	1400	6.32454	1.29638e-09	41	0.116068	NAM_JL_45	αT, δT, γT, ΣT, αT3, δT3, γT3, ΣT3, ΣTT3	9_95962596	0.98	1246115	1294956
γT3	9_96764413	9	96764413	Zm00001d046576	96775849	96776370	-		Protein argonaute 13	gene	protein_coding		-11436	γT3_6	9_95963918	11436	6.74942e-11	1			1.64814e-09	42	0.118899	NAM_JL_45	αT, δT, γT, ΣT, αT3, δT3, γT3, ΣT3, ΣTT3	9_95962596	0.98	801817	813253
γT3	9_95973059	9	95973059	Zm00001d046562	95972136	95972208	+			ncRNA_gene	tRNA		923	γT3_6	9_95963918	851	6.78035e-11	1			1.65538e-09	43	0.12173	NAM_JL_45	αT, δT, γT, ΣT, αT3, δT3, γT3, ΣT3, ΣTT3	9_95962596	0.98	10463	9540
γT3	9_94829820	9	94829820	Zm00001d046540	94826683	94831760	+		C2 and GRAM domain-containing protein	gene	protein_coding		3137	γT3_6	9_95963918	within	7.16832e-11	1			1.74611e-09	44	0.124561	NAM_JL_45	αT, δT, γT, ΣT, αT3, δT3, γT3, ΣT3, ΣTT3	9_95962596	0.98	1132776	1130836
γT3	5_205897730	5	205897730	Zm00001d017753	205897970	205901088	+		Carboxylic ester hydrolase	gene	protein_coding		-240	γT3_4	5_205853870	240	4.13468e-10	0.187877	5069	22.8993	1.88597e-09	45	0.127392	NAM_JL_28	αT, γT, αT3, γT3	5_205824621	0.55	73109	73349
γT3	9_97316650	9	97316650	Zm00001d046585	97342384	97342803	+			gene	protein_coding		-25734	γT3_6	9_95963918	25734	7.86205e-11	1			1.90784e-09	46	0.130223	NAM_JL_45	αT, δT, γT, ΣT, αT3, δT3, γT3, ΣT3, ΣTT3	9_95962596	0.98	1354054	1379788
γT3	9_95653731	9	95653731	Zm00001d046552	95727707	95731224	+		Charged multivesicular body protein 4b%253B Putative SNF domain containing family protein	gene	protein_coding		-73976	γT3_6	9_95963918	73976	2.38996e-10	0.33111	8338	37.6671	1.91978e-09	47	0.133054	NAM_JL_45	αT, δT, γT, ΣT, αT3, δT3, γT3, ΣT3, ΣTT3	9_95962596	0.98	308865	231372
γT3	5_88007638	5	88007638	Zm00001d015393	88008824	88012844	-		10A19I.15	gene	protein_coding		-1186	γT3_3	5_86085552	1186	2.58112e-10	0.333054	8387	37.8885	2.07839e-09	48	0.135885	NAM_JL_26	δT, γT, ΣT, δT3, γT3, ΣT3, ΣTT3	5_86090066	0.7	1917572	1918758
γT3	5_206063579	5	206063579	Zm00001d017761	206061161	206062765	+			gene	protein_coding		2418	γT3_4	5_205853870	814	4.34772e-08	0.00239507	145	0.655042	2.49761e-09	49	0.138716	NAM_JL_28	αT, γT, αT3, γT3	5_205824621	0.55	238958	236540
γT3	9_29394010	9	29394010	Zm00001d045631	29285315	29290140	+		Acyl-CoA N-acyltransferase with RING/FYVE/PHD-type zinc finger domain	gene	protein_coding		108695			103870	3.11668e-07	0.00037844	27	0.121973	2.81432e-09	50	0.141547	NAM_JL_45	αT, δT, γT, ΣT, αT3, δT3, γT3, ΣT3, ΣTT3	9_95962596	0.98	66568586	66672456
γT3	9_96325985	9	96325985	Zm00001d046569	96322136	96327889	-		Protein kinase superfamily protein with octicosapeptide/Phox/Bem1p domain	gene	protein_coding		3849	γT3_6	9_95963918	within	1.8655e-09	0.0674984	2143	9.68106	2.99628e-09	51	0.144378	NAM_JL_45	αT, δT, γT, ΣT, αT3, δT3, γT3, ΣT3, ΣTT3	9_95962596	0.98	363389	359540
γT3	9_98780634	9	98780634	Zm00001d046611	98772481	98777453	+		Serine/threonine-protein kinase RUNKEL	gene	protein_coding		8153	γT3_6	9_95963918	3181	1.39591e-10	1			3.30722e-09	52	0.147209	NAM_JL_45	αT, δT, γT, ΣT, αT3, δT3, γT3, ΣT3, ΣTT3	9_95962596	0.98	2818038	2809885
γT3	9_98970267	9	98970267	Zm00001d046619	99018251	99018321	+			ncRNA_gene	tRNA		-47984	γT3_6	9_95963918	47984	1.4308e-10	1			3.38635e-09	53	0.15004	NAM_JL_45	αT, δT, γT, ΣT, αT3, δT3, γT3, ΣT3, ΣTT3	9_95962596	0.98	3007671	3055655
γT3	9_94207889	9	94207889	Zm00001d046530	94210411	94211858	+		Tetratricopeptide repeat (TPR)-like superfamily protein	gene	protein_coding		-2522	γT3_6	9_95963918	2522	4.7866e-10	0.311321	7886	35.6252	3.52081e-09	54	0.152871	NAM_JL_45	αT, δT, γT, ΣT, αT3, δT3, γT3, ΣT3, ΣTT3	9_95962596	0.98	1754707	1750738
γT3	9_94655596	9	94655596	Zm00001d046537	94659231	94661958	-		ABC transporter G family member 26	gene	protein_coding		-3635	γT3_6	9_95963918	3635	1.80323e-10	1			4.22609e-09	55	0.155702	NAM_JL_45	αT, δT, γT, ΣT, αT3, δT3, γT3, ΣT3, ΣTT3	9_95962596	0.98	1307000	1300638
γT3	9_92072092	9	92072092	Zm00001d046488	92065625	92071211	-		Leucine-rich repeat protein kinase family protein	gene	protein_coding		6467	γT3_6	9_95963918	881	3.16187e-08	0.0070738	331	1.4953	5.19368e-09	56	0.158532	NAM_JL_45	αT, δT, γT, ΣT, αT3, δT3, γT3, ΣT3, ΣTT3	9_95962596	0.98	3890504	3891385
γT3	5_86058055	5	86058055	Zm00001d015355	86080662	86081459	+		Urease accessory protein F	gene	protein_coding		-22607	γT3_3	5_86085552	22607	4.50187e-10	0.524703	12523	56.573	5.47222e-09	57	0.161363	NAM_JL_26	δT, γT, ΣT, δT3, γT3, ΣT3, ΣTT3	5_86090066	0.7	32011	8607
γT3	9_29507019	9	29507019	Zm00001d045632	29535058	29540801	+		U-box domain-containing protein 14	gene	protein_coding		-28039	γT3_5	9_31072798	28039	5.80844e-09	0.0559865	1849	8.35291	7.42959e-09	58	0.164194	NAM_JL_45	αT, δT, γT, ΣT, αT3, δT3, γT3, ΣT3, ΣTT3	9_95962596	0.98	66455577	66421795
γT3	5_205764433	5	205764433	Zm00001d017743	205749775	205753794	+		Cell division control protein 48 homolog D	gene	protein_coding		14658	γT3_4	5_205853870	10639	6.33251e-10	1			1.40456e-08	59	0.167025	NAM_JL_28	αT, γT, αT3, γT3	5_205824621	0.55	60188	70827
γT3	9_94407578	9	94407578	Zm00001d046534	94413654	94418069	+		Glycosyl hydrolase superfamily protein	gene	protein_coding		-6076	γT3_6	9_95963918	6076	8.40883e-09	0.0781035	2410	10.8872	1.45431e-08	60	0.169856	NAM_JL_45	αT, δT, γT, ΣT, αT3, δT3, γT3, ΣT3, ΣTT3	9_95962596	0.98	1555018	1544527
γT3	5_205847970	5	205847970	Zm00001d017747	205846897	205847565	+		General transcription factor 2-related zinc finger protein	gene	protein_coding		1073	γT3_4	5_205853870	405	7.39241e-10	1			1.62821e-08	61	0.172687	NAM_JL_28	αT, γT, αT3, γT3	5_205824621	0.55	23349	22276
γT3	9_31072798	9	31072798	Zm00001d045650	31087032	31092256	+		Signal recognition particle 9 kDa protein	gene	protein_coding		-14234	γT3_5	9_31072798	14234	2.17971e-09	0.458147	11118	50.2259	2.16948e-08	62	0.175518	NAM_JL_45	αT, δT, γT, ΣT, αT3, δT3, γT3, ΣT3, ΣTT3	9_95962596	0.98	64889798	64870340
γT3	9_94611834	9	94611834	Zm00001d046536	94610474	94611871	+		Retrovirus-related Pol polyprotein LINE-1	gene	protein_coding		1360	γT3_6	9_95963918	within	1.2405e-09	1			2.66805e-08	63	0.178349	NAM_JL_45	αT, δT, γT, ΣT, αT3, δT3, γT3, ΣT3, ΣTT3	9_95962596	0.98	1350762	1350725
γT3	9_96450468	9	96450468	Zm00001d046571	96437176	96440002	+		Putative HLH DNA-binding domain superfamily protein	gene	protein_coding		13292	γT3_6	9_95963918	10466	1.28793e-09	1			2.76521e-08	64	0.18118	NAM_JL_45	αT, δT, γT, ΣT, αT3, δT3, γT3, ΣT3, ΣTT3	9_95962596	0.98	487872	474580
γT3	5_88097199	5	88097199	Zm00001d015394	88146164	88150303	+	PLATZ-transcription factor 8	PLATZ transcription factor family protein	gene	protein_coding		-48965	γT3_3	5_86085552	48965	2.19589e-08	0.0659128	2110	9.53198	3.09065e-08	65	0.184011	NAM_JL_26	δT, γT, ΣT, δT3, γT3, ΣT3, ΣTT3	5_86090066	0.7	2007133	2056098
γT3	9_94290504	9	94290504	Zm00001d046532	94351762	94355927	+			gene	protein_coding		-61258	γT3_6	9_95963918	61258	1.59287e-09	1			3.38609e-08	66	0.186842	NAM_JL_45	αT, δT, γT, ΣT, αT3, δT3, γT3, ΣT3, ΣTT3	9_95962596	0.98	1672092	1606669
γT3	9_98463861	9	98463861	Zm00001d046603	98458436	98460079	-		Putative cytochrome P450 superfamily protein	gene	protein_coding		5425	γT3_6	9_95963918	3782	2.28639e-09	1			4.77771e-08	67	0.189673	NAM_JL_45	αT, δT, γT, ΣT, αT3, δT3, γT3, ΣT3, ΣTT3	9_95962596	0.98	2501265	2495840
γT3	9_94130190	9	94130190	Zm00001d046527	94131233	94132903	-		F-box protein SKIP19	gene	protein_coding		-1043	γT3_6	9_95963918	1043	2.30743e-09	1			4.81956e-08	68	0.192504	NAM_JL_45	αT, δT, γT, ΣT, αT3, δT3, γT3, ΣT3, ΣTT3	9_95962596	0.98	1832406	1829693
γT3	9_99136995	9	99136995	Zm00001d046621	99138564	99141663	+	glossy15	Floral homeotic protein APETALA 2	gene	protein_coding		-1569	γT3_6	9_95963918	1569	2.67228e-09	1			5.5424e-08	69	0.195335	NAM_JL_45	αT, δT, γT, ΣT, αT3, δT3, γT3, ΣT3, ΣTT3	9_95962596	0.98	3174399	3175968
γT3	9_98847244	9	98847244	Zm00001d046616	98847757	98851557	-		Protein kinase superfamily protein	gene	protein_coding		-513	γT3_6	9_95963918	513	7.71828e-09	0.356537	8882	40.1247	5.69935e-08	70	0.198166	NAM_JL_45	αT, δT, γT, ΣT, αT3, δT3, γT3, ΣT3, ΣTT3	9_95962596	0.98	2884648	2885161
γT3	9_97853255	9	97853255	Zm00001d046596	97904170	97905084	-		Bifunctional inhibitor/lipid-transfer protein/seed storage 2S albumin superfamily protein	gene	protein_coding		-50915	γT3_6	9_95963918	50915	2.30615e-08	0.147457	4152	18.7568	6.97097e-08	71	0.200996	NAM_JL_45	αT, δT, γT, ΣT, αT3, δT3, γT3, ΣT3, ΣTT3	9_95962596	0.98	1890659	1941574
γT3	9_79082798	9	79082798	Zm00001d046299	79124493	79126324	+	HSF-transcription factor 28	HSF28 HSF type transcription factor	gene	protein_coding		-41695			41695	1.17735e-05	0.000305587	20	0.0903506	7.35498e-08	72	0.203827	NAM_JL_45	αT, δT, γT, ΣT, αT3, δT3, γT3, ΣT3, ΣTT3	9_95962596	0.98	16879798	16836272
γT3	5_69576695	5	69576695	Zm00001d014950	69573089	69578098	+		Peptidase C78 ubiquitin fold modifier-specific peptidase 1/ 2	gene	protein_coding		3606			within	3.03754e-06	0.00147642	97	0.4382	9.06919e-08	73	0.206658	NAM_JL_25	αT3, ΣT3			0
γT3	9_94143650	9	94143650	Zm00001d046529	94134221	94142110	-			gene	protein_coding		9429	γT3_6	9_95963918	1540	5.04352e-09	1			1.01401e-07	74	0.209489	NAM_JL_45	αT, δT, γT, ΣT, αT3, δT3, γT3, ΣT3, ΣTT3	9_95962596	0.98	1818946	1820486
γT3	9_102753856	9	102753856	Zm00001d046695	102720487	102720801	+			gene	protein_coding		33369	γT3_6	9_95963918	33055	5.39066e-09	1			1.08021e-07	75	0.21232	NAM_JL_45	αT, δT, γT, ΣT, αT3, δT3, γT3, ΣT3, ΣTT3	9_95962596	0.98	6791260	6757891
γT3	9_30403086	9	30403086	Zm00001d045640	30396772	30402560	-		HVA22-like protein a	gene	protein_coding		6314	γT3_5	9_31072798	526	5.77652e-09	1			1.15354e-07	76	0.215151	NAM_JL_45	αT, δT, γT, ΣT, αT3, δT3, γT3, ΣT3, ΣTT3	9_95962596	0.98	65559510	65560036
γT3	9_29909023	9	29909023	Zm00001d045633	29760618	29761802	+		Putative SNF1-related protein kinase family protein	gene	protein_coding		148405	γT3_5	9_31072798	147221	5.80844e-09	1			1.1596e-07	77	0.217982	NAM_JL_45	αT, δT, γT, ΣT, αT3, δT3, γT3, ΣT3, ΣTT3	9_95962596	0.98	66053573	66200794
γT3	9_93859787	9	93859787	Zm00001d046524	93804102	93804983	+		Protein REDUCED WALL ACETYLATION 2	gene	protein_coding		55685	γT3_6	9_95963918	54804	6.35585e-09	1			1.26315e-07	78	0.220813	NAM_JL_45	αT, δT, γT, ΣT, αT3, δT3, γT3, ΣT3, ΣTT3	9_95962596	0.98	2102809	2157613
γT3	9_30221951	9	30221951	Zm00001d045635	30190972	30217757	+		Helicase protein MOM1	gene	protein_coding		30979	γT3_5	9_31072798	4194	7.20173e-09	0.974393	21649	97.8	1.38767e-07	79	0.223644	NAM_JL_45	αT, δT, γT, ΣT, αT3, δT3, γT3, ΣT3, ΣTT3	9_95962596	0.98	65740645	65744839
γT3	9_29101379	9	29101379	Zm00001d045624	29081946	29100427	+			gene	protein_coding		19433	γT3_5	9_31072798	952	7.20173e-09	1			1.42227e-07	80	0.226475	NAM_JL_45	αT, δT, γT, ΣT, αT3, δT3, γT3, ΣT3, ΣTT3	9_95962596	0.98	66861217	66862169
γT3	9_97938167	9	97938167	Zm00001d046598	97932553	97936078	+			gene	protein_coding		5614	γT3_6	9_95963918	2089	1.90532e-07	0.0542397	1810	8.17673	2.00361e-07	81	0.229306	NAM_JL_45	αT, δT, γT, ΣT, αT3, δT3, γT3, ΣT3, ΣTT3	9_95962596	0.98	1975571	1969957
γT3	3_206025173	3	206025173	Zm00001d043651	206031893	206033971	-		Tryptophan aminotransferase-related protein 4	gene	protein_coding		-6720			6720	5.30661e-07	0.0209765	807	3.64565	2.14987e-07	82	0.232137	NAM_JL_18	αT, γT, ΣT, δT3			0
γT3	9_99049467	9	99049467	Zm00001d046620	99030711	99031235	-			gene	protein_coding		18756	γT3_6	9_95963918	18232	1.25625e-08	1			2.41106e-07	83	0.234968	NAM_JL_45	αT, δT, γT, ΣT, αT3, δT3, γT3, ΣT3, ΣTT3	9_95962596	0.98	3086871	3068115
γT3	5_61159296	5	61159296	Zm00001d014742	61158657	61162310	+		F-box protein SKIP31	gene	protein_coding		639	γT3_1	5_61159296	within	1.59399e-08	0.801936	18158	82.0293	2.45112e-07	84	0.237799	NAM_JL_25	αT3, ΣT3			0
γT3	5_205472279	5	205472279	Zm00001d017730	205467077	205473131	-		Protein BREVIS RADIX	gene	protein_coding		5202	γT3_4	5_205853870	within	1.82866e-08	0.704893	16159	72.9987	2.47061e-07	85	0.24063	NAM_JL_28	αT, γT, αT3, γT3	5_205824621	0.55	352342	351490
γT3	9_77342349	9	77342349	Zm00001d046267	77352323	77357618	+			gene	protein_coding		-9974			9974	1.44491e-08	1			2.75294e-07	86	0.243461	NAM_JL_45	αT, δT, γT, ΣT, αT3, δT3, γT3, ΣT3, ΣTT3	9_95962596	0.98	18620247	18604978
γT3	9_93920662	9	93920662	Zm00001d046525	93919377	93919450	+			ncRNA_gene	tRNA		1285	γT3_6	9_95963918	1212	1.56459e-08	1			2.96851e-07	87	0.246291	NAM_JL_45	αT, δT, γT, ΣT, αT3, δT3, γT3, ΣT3, ΣTT3	9_95962596	0.98	2041934	2043146
γT3	5_88064550	5	88064550	Zm00001d001594	88035959	88036351	+			ncRNA_gene	lincRNA		28591	γT3_3	5_86085552	28199	1.68815e-08	1			3.1901e-07	88	0.249122	NAM_JL_26	δT, γT, ΣT, δT3, γT3, ΣT3, ΣTT3	5_86090066	0.7	1974484	1945893
γT3	9_27546947	9	27546947	Zm00001d045590	27537950	27546688	-		DExH-box ATP-dependent RNA helicase DExH9	gene	protein_coding		8997	γT3_5	9_31072798	259	2.58397e-08	0.855863	19252	86.9714	4.11941e-07	89	0.251953	NAM_JL_45	αT, δT, γT, ΣT, αT3, δT3, γT3, ΣT3, ΣTT3	9_95962596	0.98	68415649	68415908
γT3	9_78924664	9	78924664	Zm00001d046298	78902785	78903875	+		Nuclear pore complex protein GP210	gene	protein_coding		21879	γT3_6	9_95963918	20789	2.81788e-08	1			5.18058e-07	90	0.254784	NAM_JL_45	αT, δT, γT, ΣT, αT3, δT3, γT3, ΣT3, ΣTT3	9_95962596	0.98	17037932	17058721
γT3	5_205953756	5	205953756	Zm00001d017755	205944885	205951175	-		Rop guanine nucleotide exchange factor 14	gene	protein_coding		8871	γT3_4	5_205853870	2581	1.0539e-07	0.304954	7758	35.047	5.86641e-07	91	0.257615	NAM_JL_28	αT, γT, αT3, γT3	5_205824621	0.55	129135	120264
γT3	9_93518600	9	93518600	Zm00001d046521	93513252	93518345	+		Vacuolar protein sorting-associated protein 9A	gene	protein_coding		5348	γT3_6	9_95963918	255	9.70052e-08	0.443205	10793	48.7577	7.72253e-07	92	0.260446	NAM_JL_45	αT, δT, γT, ΣT, αT3, δT3, γT3, ΣT3, ΣTT3	9_95962596	0.98	2443996	2444251
γT3	9_92162816	9	92162816	Zm00001d046490	92160670	92162718	-		NADP-dependent oxidoreductase P2%253B Putative alcohol dehydrogenase superfamily protein	gene	protein_coding		2146			98	3.62196e-05	0.00145568	96	0.433683	9.36283e-07	93	0.263277	NAM_JL_45	αT, δT, γT, ΣT, αT3, δT3, γT3, ΣT3, ΣTT3	9_95962596	0.98	3799780	3799878
γT3	10_99246623	10	99246623	Zm00001d025005	99217386	99219471	-	Yucca2	Yucca2	gene	protein_coding		29237			27152	0.00012926	0.000420617	30	0.135526	9.63823e-07	94	0.266108	NAM_JL_51	αT3, ΣT3			0
γT3	5_88359397	5	88359397	Zm00001d015399	88372291	88376274	+		Choline-phosphate cytidylyltransferase 2	gene	protein_coding		-12894			12894	5.57929e-06	0.0102796	447	2.01934	1.01365e-06	95	0.268939	NAM_JL_26	δT, γT, ΣT, δT3, γT3, ΣT3, ΣTT3	5_86090066	0.7	2269331	2282225
γT3	5_85123015	5	85123015	Zm00001d015338	85119954	85121228	+		OSJNBa0058K23.8 protein%3B protein	gene	protein_coding		3061	γT3_3	5_86085552	1787	9.19712e-08	0.674287	15517	70.0985	1.09121e-06	96	0.27177	NAM_JL_26	δT, γT, ΣT, δT3, γT3, ΣT3, ΣTT3	5_86090066	0.7	967051	968838
γT3	5_72253312	5	72253312	Zm00001d015015	72249115	72253729	-		ENTH/VHS/GAT family protein	gene	protein_coding		4197	γT3_2	5_72253312	within	7.03572e-08	1			1.22912e-06	97	0.274601	NAM_JL_25	αT3, ΣT3			0
γT3	5_206101753	5	206101753	Zm00001d001728	206105920	206106223	+			ncRNA_gene	lincRNA		-4167	γT3_4	5_205853870	4167	7.26429e-08	1			1.26673e-06	98	0.277432	NAM_JL_28	αT, γT, αT3, γT3	5_205824621	0.55	277132	281299
γT3	5_85994563	5	85994563	Zm00001d015354	85946140	85946524	+		Auxin-responsive protein SAUR71	gene	protein_coding		48423	γT3_3	5_86085552	48039	7.73924e-08	1			1.34465e-06	99	0.280263	NAM_JL_26	δT, γT, ΣT, δT3, γT3, ΣT3, ΣTT3	5_86090066	0.7	95503	143542
γT3	9_30959684	9	30959684	Zm00001d045649	30986811	30987830	+		Ribonucleoside-diphosphate reductase small chain	gene	protein_coding		-27127	γT3_5	9_31072798	27127	2.20069e-07	0.36868	9144	41.3083	1.40584e-06	100	0.283094	NAM_JL_45	αT, δT, γT, ΣT, αT3, δT3, γT3, ΣT3, ΣTT3	9_95962596	0.98	65002912	64974766
γT3	9_97679224	9	97679224	Zm00001d046593	97674582	97680959	+	acid phosphatase1	acid phosphatase1	gene	protein_coding		4642	γT3_6	9_95963918	within	1.25173e-07	0.755905	17211	77.7512	1.62493e-06	101	0.285925	NAM_JL_45	αT, δT, γT, ΣT, αT3, δT3, γT3, ΣT3, ΣTT3	9_95962596	0.98	1716628	1711986
γT3	2_191442210	2	191442210	Zm00001d005874	191436169	191438639	-			gene	protein_coding		6041			3571	0.00930804	1.03003e-05	3	0.0135526	1.64525e-06	102	0.288756	NAM_JL_11	γT, ΣT, ΣTT3			0
γT3	5_61119396	5	61119396	Zm00001d014737	61117986	61119432	+		Arogenate dehydrogenase 1 chloroplastic	gene	protein_coding	Yes	1410	γT3_1	5_61159296	within	1.1949e-07	0.814797	18420	83.2129	1.66923e-06	103	0.291586	NAM_JL_25	αT3, ΣT3			0
γT3	9_99344794	9	99344794	Zm00001d046624	99409598	99416154	+		Probable E3 ubiquitin ligase SUD1	gene	protein_coding		-64804			64804	6.78381e-07	0.149511	4204	18.9917	1.73478e-06	104	0.294417	NAM_JL_45	αT, δT, γT, ΣT, αT3, δT3, γT3, ΣT3, ΣTT3	9_95962596	0.98	3382198	3447002
γT3	9_31119155	9	31119155	Zm00001d045651	31123468	31123860	-			gene	protein_coding		-4313	γT3_5	9_31072798	4313	1.20548e-07	0.957219	21321	96.3182	1.95875e-06	105	0.297248	NAM_JL_45	αT, δT, γT, ΣT, αT3, δT3, γT3, ΣT3, ΣTT3	9_95962596	0.98	64843441	64838736
γT3	5_83041833	5	83041833	Zm00001d015293	82992330	82999777	-		VIN3-like protein 2	gene	protein_coding		49503			42056	0.000153568	0.000866424	56	0.252982	2.23966e-06	106	0.300079					0
γT3	9_98840183	9	98840183	Zm00001d046614	98840365	98840652	-			gene	protein_coding		-182	γT3_6	9_95963918	182	1.36217e-07	1			2.28967e-06	107	0.30291	NAM_JL_45	αT, δT, γT, ΣT, αT3, δT3, γT3, ΣT3, ΣTT3	9_95962596	0.98	2877587	2877769
γT3	9_98840183	9	98840183	Zm00001d046615	98843549	98843620	+			ncRNA_gene	tRNA		-3366	γT3_6	9_95963918	3366	1.36217e-07	1			2.28967e-06	108	0.305741	NAM_JL_45	αT, δT, γT, ΣT, αT3, δT3, γT3, ΣT3, ΣTT3	9_95962596	0.98	2877587	2880953
γT3	1_196541616	1	196541616	Zm00001d031621	196575044	196584218	+		5'-methylthioadenosine/S-adenosylhomocysteine nucleosidase 2	gene	protein_coding		-33428			33428	3.51673e-06	0.0393734	1377	6.22064	2.32521e-06	109	0.308572					0
γT3	5_86776588	5	86776588	Zm00001d015372	86733894	86746224	-		CONTAINS InterPro DOMAIN/s: Ribonuclease H2 subunit C (InterPro:IPR013924)%3B Has 30201 Blast hits to 17322 proteins in 780 species: Archae - 12%3B Bacteria - 1396%3B Metazoa - 17338%3B Fungi - 3422%3B Plants - 5037%3B Viruses - 0%3B Other Eukaryotes - 2996 (sou /.../CBI BLink).	gene	protein_coding		42694			30364	5.16672e-07	0.270681	6985	31.5549	2.34711e-06	110	0.311403	NAM_JL_26	δT, γT, ΣT, δT3, γT3, ΣT3, ΣTT3	5_86090066	0.7	686522	643828
γT3	9_25853543	9	25853543	Zm00001d045540	25852225	25855075	+			gene	protein_coding		1318			within	3.76586e-05	0.00466365	243	1.09776	2.90748e-06	111	0.314234					0
γT3	9_111424711	9	111424711	Zm00001d046929	111339069	111342913	+		Protein transport protein Sec61 subunit gamma-3	gene	protein_coding		85642			81798	1.01427e-05	0.0175134	687	3.10354	2.93869e-06	112	0.317065					0
γT3	9_25192793	9	25192793	Zm00001d045516	25240624	25249861	+		Probable transcriptional regulator SLK2	gene	protein_coding		-47831			47831	1.34581e-05	0.0136548	557	2.51626	3.03394e-06	113	0.319896					0
γT3	9_102173877	9	102173877	Zm00001d046682	102206373	102207074	-		Peroxiredoxin-5	gene	protein_coding		-32496			32496	7.77205e-06	0.025746	963	4.35038	3.28653e-06	114	0.322727	NAM_JL_45	αT, δT, γT, ΣT, αT3, δT3, γT3, ΣT3, ΣTT3	9_95962596	0.98	6211281	6243777
γT3	9_93574796	9	93574796	Zm00001d046523	93565582	93565654	-			ncRNA_gene	tRNA		9214	γT3_6	9_95963918	9142	2.02905e-07	1			3.32978e-06	115	0.325558	NAM_JL_45	αT, δT, γT, ΣT, αT3, δT3, γT3, ΣT3, ΣTT3	9_95962596	0.98	2387800	2396942
γT3	9_97673722	9	97673722	Zm00001d046592	97669727	97674265	-		ER membrane protein complex subunit 7 homolog	gene	protein_coding		3995	γT3_6	9_95963918	within	2.23828e-07	0.941144	20994	94.841	3.44906e-06	116	0.328389	NAM_JL_45	αT, δT, γT, ΣT, αT3, δT3, γT3, ΣT3, ΣTT3	9_95962596	0.98	1711126	1707131
γT3	5_205079386	5	205079386	Zm00001d017717	205082975	205085670	+		ADP-ribosylation factor B1B	gene	protein_coding		-3589			3589	0.000149428	0.001449	95	0.429165	3.53916e-06	117	0.33122	NAM_JL_28	αT, γT, αT3, γT3	5_205824621	0.55	745235	738951
γT3	2_198052249	2	198052249	Zm00001d006096	198090417	198092894	+			gene	protein_coding		-38168			38168	0.000930854	0.000236391	16	0.0722804	3.59322e-06	118	0.334051	NAM_JL_11	γT, ΣT, ΣTT3			0
γT3	2_15092801	2	15092801	Zm00001d002544	15091610	15099493	+		Regulator of chromosome condensation (RCC1) family with FYVE zinc finger domain	gene	protein_coding		1191			within	1.6299e-05	0.0141357	570	2.57499	3.75166e-06	119	0.336881					0
γT3	9_96874302	9	96874302	Zm00001d046580	96873565	96874200	+		Sterile alpha motif (SAM) domain-containing protein	gene	protein_coding		737			102	9.52026e-07	0.24261	6385	28.8444	3.76043e-06	120	0.339712	NAM_JL_45	αT, δT, γT, ΣT, αT3, δT3, γT3, ΣT3, ΣTT3	9_95962596	0.98	911706	910969
γT3	9_30227955	9	30227955	Zm00001d045636	30233033	30234250	+		Zinc finger protein CONSTANS-LIKE 12	gene	protein_coding		-5078	γT3_5	9_31072798	5078	2.32161e-07	1			3.77861e-06	121	0.342543	NAM_JL_45	αT, δT, γT, ΣT, αT3, δT3, γT3, ΣT3, ΣTT3	9_95962596	0.98	65734641	65728346
γT3	9_93063374	9	93063374	Zm00001d046508	93066048	93070157	+	phospholipase D6	phospholipase D5	gene	protein_coding		-2674			2674	1.13797e-06	0.213285	5687	25.6912	3.93957e-06	122	0.345374	NAM_JL_45	αT, δT, γT, ΣT, αT3, δT3, γT3, ΣT3, ΣTT3	9_95962596	0.98	2899222	2892439
γT3	9_99530642	9	99530642	Zm00001d046625	99488946	99492927	+		Calcium-binding protein	gene	protein_coding		41696			37715	5.10928e-07	0.487211	11686	52.7918	4.03418e-06	123	0.348205	NAM_JL_45	αT, δT, γT, ΣT, αT3, δT3, γT3, ΣT3, ΣTT3	9_95962596	0.98	3568046	3526350
γT3	9_101222931	9	101222931	Zm00001d046665	101213443	101215182	+		Phytosulfokines 1	gene	protein_coding		9488			7749	4.16977e-05	0.00635869	309	1.39592	4.2802e-06	124	0.351036	NAM_JL_45	αT, δT, γT, ΣT, αT3, δT3, γT3, ΣT3, ΣTT3	9_95962596	0.98	5260335	5250847
γT3	9_92961410	9	92961410	Zm00001d046506	92956668	92968289	+		Serine/threonine-protein phosphatase 2A 65 kDa regulatory subunit A beta isoform	gene	protein_coding		4742			within	7.90866e-07	0.349116	8726	39.4199	4.44596e-06	125	0.353867	NAM_JL_45	αT, δT, γT, ΣT, αT3, δT3, γT3, ΣT3, ΣTT3	9_95962596	0.98	3001186	2994307
γT3	5_168202240	5	168202240	Zm00001d016581	168223687	168255407	+		DNA polymerase epsilon catalytic subunit A	gene	protein_coding		-21447			21447	1.3864e-05	0.0205619	792	3.57788	4.58124e-06	126	0.356698					0
γT3	3_143668678	3	143668678	Zm00001d041920	143644925	143649063	-	bZIP-transcription factor 8	Transcription factor PosF21	gene	protein_coding		23753			19615	0.031304	9.67363e-06	2	0.00903506	4.84824e-06	127	0.359529	NAM_JL_14	αT3, δT3, γT3, ΣT3	3_122899586	0.08	20769092	20745339
γT3	5_211410518	5	211410518	Zm00001d017986	211406416	211411375	-	E2F-DP-transcription factor 27	E2F transcription factor-like E2FE	gene	protein_coding		4102			within	0.00196219	0.000154977	10	0.0451753	4.86731e-06	128	0.36236					0
γT3	9_29394010	9	29394010	Zm00001d045630	29283539	29285959	-		Retrovirus-related Pol polyprotein LINE-1	gene	protein_coding		110471			108051	3.11668e-07	1			4.98087e-06	129	0.365191	NAM_JL_45	αT, δT, γT, ΣT, αT3, δT3, γT3, ΣT3, ΣTT3	9_95962596	0.98	66568586	66676637
γT3	9_34517261	9	34517261	Zm00001d045706	34496670	34509714	+	restorer of fertility2	Restorer of fertility2	gene	protein_coding		20591			7547	7.83663e-06	0.040365	1407	6.35616	5.05061e-06	130	0.368022	NAM_JL_45	αT, δT, γT, ΣT, αT3, δT3, γT3, ΣT3, ΣTT3	9_95962596	0.98	61445335	61452882
γT3	5_88564678	5	88564678	Zm00001d015407	88561896	88565000	-	G2-like-transcription factor 53	Myb family transcription factor APL	gene	protein_coding		2782			within	3.62382e-07	0.898129	20072	90.6758	5.18728e-06	131	0.370853	NAM_JL_26	δT, γT, ΣT, δT3, γT3, ΣT3, ΣTT3	5_86090066	0.7	2474612	2471830
γT3	9_89348243	9	89348243	Zm00001d046424	89351972	89352930	-		Agglutinin-2	gene	protein_coding		-3729			3729	3.2653e-07	1			5.20318e-06	132	0.373684	NAM_JL_45	αT, δT, γT, ΣT, αT3, δT3, γT3, ΣT3, ΣTT3	9_95962596	0.98	6614353	6609666
γT3	9_92922921	9	92922921	Zm00001d046505	92932044	92932852	+			gene	protein_coding		-9123			9123	3.50362e-07	1			5.55824e-06	133	0.376515	NAM_JL_45	αT, δT, γT, ΣT, αT3, δT3, γT3, ΣT3, ΣTT3	9_95962596	0.98	3039675	3029744
γT3	9_91851260	9	91851260	Zm00001d046480	91882164	91884352	+		O-Glycosyl hydrolases family 17 protein	gene	protein_coding		-30904			30904	3.72596e-07	1			5.88804e-06	134	0.379345	NAM_JL_45	αT, δT, γT, ΣT, αT3, δT3, γT3, ΣT3, ΣTT3	9_95962596	0.98	4111336	4078244
γT3	9_111473005	9	111473005	Zm00001d046930	111511279	111512259	+		Transducin/WD40 repeat-like superfamily protein	gene	protein_coding		-38274			38274	7.4115e-06	0.0546932	1822	8.23094	6.37162e-06	135	0.382176					0
γT3	1_200282708	1	200282708	Zm00001d031737	200260170	200262141	-		NC domain-containing protein-related	gene	protein_coding		22538			20567	0.00243148	0.00016812	11	0.0496928	6.42198e-06	136	0.385007					0
γT3	5_61151590	5	61151590	Zm00001d014741	61156494	61157174	+			gene	protein_coding		-4904			4904	4.12892e-07	1			6.48244e-06	137	0.387838	NAM_JL_25	αT3, ΣT3			0
γT3	5_81752067	5	81752067	Zm00001d015259	81752266	81766811	+		26S proteasome non-ATPase regulatory subunit 2 homolog A	gene	protein_coding		-199			199	0.000346458	0.00125469	80	0.361402	6.80238e-06	138	0.390669					0
γT3	5_87279455	5	87279455	Zm00001d015380	87277184	87278351	+			gene	protein_coding		2271			1104	4.41563e-07	1			6.90292e-06	139	0.3935	NAM_JL_26	δT, γT, ΣT, δT3, γT3, ΣT3, ΣTT3	5_86090066	0.7	1189389	1187118
γT3	10_134459224	10	134459224	Zm00001d025946	134457486	134477101	+		Serine/threonine-protein kinase GRIK1	gene	protein_coding		1738			within	0.000653485	0.000752992	52	0.234911	7.63919e-06	140	0.396331					0
γT3	9_101914714	9	101914714	Zm00001d046676	101918009	101919782	+		tryptophan synthase beta type 2	gene	protein_coding		-3295			3295	5.73796e-07	0.890211	19908	89.9349	7.91089e-06	141	0.399162	NAM_JL_45	αT, δT, γT, ΣT, αT3, δT3, γT3, ΣT3, ΣTT3	9_95962596	0.98	5952118	5955413
γT3	5_86776588	5	86776588	Zm00001d001590	86735930	86736305	+			ncRNA_gene	lincRNA		40658			40283	5.16672e-07	1			7.99594e-06	142	0.401993	NAM_JL_26	δT, γT, ΣT, δT3, γT3, ΣT3, ΣTT3	5_86090066	0.7	686522	645864
γT3	9_92349984	9	92349984	Zm00001d046493	92349534	92350909	-	heme oxygenase3	heme oxygenase3	gene	protein_coding		450			within	5.23845e-07	1			8.09973e-06	143	0.404824	NAM_JL_45	αT, δT, γT, ΣT, αT3, δT3, γT3, ΣT3, ΣTT3	9_95962596	0.98	3612612	3611687
γT3	9_83033256	9	83033256	Zm00001d046352	82889286	82893077	-		Elongation factor 1-gamma 3	gene	protein_coding		143970			140179	0.000135733	0.00388426	212	0.957716	8.14854e-06	144	0.407655	NAM_JL_45	αT, δT, γT, ΣT, αT3, δT3, γT3, ΣT3, ΣTT3	9_95962596	0.98	12929340	13069519
γT3	8_7957320	8	7957320	Zm00001d008407	7956555	7961097	+		Protein RER1B	gene	protein_coding		765			within	0.000679821	0.000787754	53	0.239429	8.26862e-06	145	0.410486					0
γT3	6_146402275	6	146402275	Zm00001d038049	146401513	146405955	-		Lichenase-2%253B Putative O-Glycosyl hydrolase superfamily protein	gene	protein_coding		762			within	0.000124109	0.00439086	233	1.05258	8.40449e-06	146	0.413317	NAM_JL_32	αT, γT3, ΣT3, ΣTT3	6_137234579	0.64	9167696	9166934
γT3	2_237101211	2	237101211	Zm00001d007661	237091675	237098914	-		Glutathione synthetase chloroplastic	gene	protein_coding		9536			2297	0.000122227	0.00463774	241	1.08872	8.72007e-06	147	0.416148					0
γT3	1_57396595	1	57396595	Zm00001d029083	57394910	57397707	+		alanine--glyoxylate aminotransferase1	gene	protein_coding		1685			within	0.000383667	0.00150382	99	0.447235	8.86539e-06	148	0.418979					0
γT3	9_101654955	9	101654955	Zm00001d046671	101608038	101612532	+		40S ribosomal protein S4-3	gene	protein_coding		46917			42423	5.86791e-07	1			9.00642e-06	149	0.42181	NAM_JL_45	αT, δT, γT, ΣT, αT3, δT3, γT3, ΣT3, ΣTT3	9_95962596	0.98	5692359	5645442
γT3	9_97589681	9	97589681	Zm00001d046591	97600588	97605812	-	vacuolar-type H+-pyrophosphatase5	vacuolar-type H+-pyrophosphatase5	gene	protein_coding		-10907			10907	8.21535e-06	0.0716682	2237	10.1057	9.03494e-06	150	0.42464	NAM_JL_45	αT, δT, γT, ΣT, αT3, δT3, γT3, ΣT3, ΣTT3	9_95962596	0.98	1627085	1637992
γT3	9_97419224	9	97419224	Zm00001d046586	97425941	97427404	+		Transmembrane amino acid transporter family protein	gene	protein_coding		-6717			6717	1.08307e-06	0.547504	12980	58.6375	9.09522e-06	151	0.427471	NAM_JL_45	αT, δT, γT, ΣT, αT3, δT3, γT3, ΣT3, ΣTT3	9_95962596	0.98	1456628	1463345
γT3	3_193852435	3	193852435	Zm00001d043268	193854722	193855913	-		60S ribosomal protein L12-3	gene	protein_coding		-2287			2287	5.962e-07	1			9.14134e-06	152	0.430302	NAM_JL_18	αT, γT, ΣT, δT3			0
γT3	5_199354962	5	199354962	Zm00001d017551	199349177	199350492	+		DUF241 domain protein	gene	protein_coding		5785			4470	0.00192978	0.000313807	23	0.103903	9.2757e-06	153	0.433133	NAM_JL_27	δT			0
γT3	9_101659837	9	101659837	Zm00001d046672	101701192	101705340	+			gene	protein_coding		-41355			41355	1.57532e-06	0.385436	9508	42.9527	9.29866e-06	154	0.435964	NAM_JL_45	αT, δT, γT, ΣT, αT3, δT3, γT3, ΣT3, ΣTT3	9_95962596	0.98	5697241	5738596
γT3	9_78830959	9	78830959	Zm00001d046297	78828543	78829768	+		Protodermal factor 1	gene	protein_coding		2416			1191	5.50247e-06	0.11369	3287	14.8491	9.5617e-06	155	0.438795	NAM_JL_45	αT, δT, γT, ΣT, αT3, δT3, γT3, ΣT3, ΣTT3	9_95962596	0.98	17131637	17132828
γT3	9_25700726	9	25700726	Zm00001d045533	25739313	25742304	+		Growth-regulating factor 6	gene	protein_coding		-38587			38587	1.03307e-05	0.0633579	2039	9.21124	9.97465e-06	156	0.441626					0
γT3	2_237047013	2	237047013	Zm00001d007655	237052725	237059681	-			gene	protein_coding		-5712			5712	1.54895e-06	0.429709	10522	47.5334	1.01321e-05	157	0.444457					0
γT3	3_159138226	3	159138226	Zm00001d042288	159141395	159142793	-	NAC-transcription factor 90	NAC domain-containing protein 68	gene	protein_coding		-3169			3169	0.000108445	0.00632337	306	1.38236	1.04183e-05	158	0.447288	NAM_JL_15	αT			0
γT3	8_27199042	8	27199042	Zm00001d008957	27190533	27195349	-		Indole-3-acetic acid-amido synthetase GH3.6	gene	protein_coding		8509			3693	1.82548e-05	0.0392659	1372	6.19805	1.08583e-05	159	0.450119					0
γT3	9_90411411	9	90411411	Zm00001d046449	90421943	90425048	+	elongation factor 1-alpha9	elongation factor 1-alpha9	gene	protein_coding		-10532			10532	6.19785e-05	0.0119404	497	2.24521	1.1187e-05	160	0.45295	NAM_JL_45	αT, δT, γT, ΣT, αT3, δT3, γT3, ΣT3, ΣTT3	9_95962596	0.98	5551185	5537548
γT3	10_131476932	10	131476932	Zm00001d025846	131474854	131478746	-		Beta-glucosidase 47	gene	protein_coding		2078			within	0.000298404	0.00250053	152	0.686664	1.12734e-05	161	0.455781					0
γT3	5_47729543	5	47729543	Zm00001d014449	47751804	47756916	-		Chromo domain-containing protein LHP1	gene	protein_coding		-22261			22261	0.00104182	0.000725999	50	0.225876	1.14171e-05	162	0.458612	NAM_JL_25	αT3, ΣT3			0
γT3	8_30073494	8	30073494	Zm00001d009010	30106964	30108529	-		Plasma membrane-associated cation-binding protein 1	gene	protein_coding		-33470			33470	0.00332953	0.0002275	14	0.0632454	1.14327e-05	163	0.461443					0
γT3	3_222959603	3	222959603	Zm00001d044246	222967858	222968792	+		Histone H2A	gene	protein_coding		-8255			8255	2.81708e-05	0.0271536	1008	4.55367	1.1538e-05	164	0.464274					0
γT3	9_42416539	9	42416539	Zm00001d045833	42386300	42387215	-			gene	protein_coding		30239			29324	3.57212e-06	0.219165	5823	26.3056	1.17905e-05	165	0.467105	NAM_JL_45	αT, δT, γT, ΣT, αT3, δT3, γT3, ΣT3, ΣTT3	9_95962596	0.98	53546057	53575381
γT3	9_92834018	9	92834018	Zm00001d046501	92852327	92853497	-		Ethylene-responsive transcription factor WIN1	gene	protein_coding		-18309			18309	7.8619e-07	1			1.18369e-05	166	0.469935	NAM_JL_45	αT, δT, γT, ΣT, αT3, δT3, γT3, ΣT3, ΣTT3	9_95962596	0.98	3128578	3109099
γT3	9_92961410	9	92961410	Zm00001d046507	92964758	92964829	-			ncRNA_gene	tRNA		-3348			3348	7.90866e-07	1			1.19026e-05	167	0.472766	NAM_JL_45	αT, δT, γT, ΣT, αT3, δT3, γT3, ΣT3, ΣTT3	9_95962596	0.98	3001186	2997767
γT3	4_24824589	4	24824589	Zm00001d049294	24896748	24900567	+	bHLH-transcription factor 130	Putative HLH DNA-binding domain superfamily protein	gene	protein_coding		-72159			72159	0.000927983	0.000934459	61	0.275569	1.29711e-05	168	0.475597					0
γT3	9_97997410	9	97997410	Zm00001d046599	98003371	98003985	-	supernumerary aleurone1	Supernumerary aleurone1	gene	protein_coding		-5961			5961	1.04275e-06	0.832804	18787	84.8708	1.29884e-05	169	0.478428	NAM_JL_45	αT, δT, γT, ΣT, αT3, δT3, γT3, ΣT3, ΣTT3	9_95962596	0.98	2034814	2040775
γT3	5_205026919	5	205026919	Zm00001d017713	205042879	205045991	+		Protein NRT1/ PTR FAMILY 8.3	gene	protein_coding		-15960			15960	7.47922e-05	0.0119572	498	2.24973	1.33495e-05	170	0.481259	NAM_JL_28	αT, γT, αT3, γT3	5_205824621	0.55	797702	778630
γT3	3_185203563	3	185203563	Zm00001d042966	185204150	185206008	+		40S ribosomal protein S23-2	gene	protein_coding		-587			587	8.40265e-05	0.011498	491	2.21811	1.43471e-05	171	0.48409	NAM_JL_17	ΣTT3			0
γT3	9_92912200	9	92912200	Zm00001d046504	92911658	92911730	-			ncRNA_gene	tRNA		542			470	1.02082e-06	1			1.5103e-05	172	0.486921	NAM_JL_45	αT, δT, γT, ΣT, αT3, δT3, γT3, ΣT3, ΣTT3	9_95962596	0.98	3050396	3050866
γT3	2_55721869	2	55721869	Zm00001d003709	55723782	55724426	+		Cell wall / vacuolar inhibitor of fructosidase 2	gene	protein_coding		-1913			1913	0.0143096	7.16662e-05	8	0.0361402	1.51677e-05	173	0.489752	NAM_JL_10	δT, γT, αT3, γT3, ΣT3	2_45757168	0.11	9964701	9966614
γT3	1_285342952	1	285342952	Zm00001d034160	285335178	285337132	+	G2-like-transcription factor 44	DNA binding protein	gene	protein_coding		7774			5820	0.00329386	0.000313129	22	0.0993856	1.52488e-05	174	0.492583	NAM_JL_7	αT3			0
γT3	9_73761951	9	73761951	Zm00001d046234	73800614	73803659	-		Inositol oxygenase 2	gene	protein_coding		-38663			38663	5.87256e-05	0.0175879	691	3.12161	1.52689e-05	175	0.495414	NAM_JL_45	αT, δT, γT, ΣT, αT3, δT3, γT3, ΣT3, ΣTT3	9_95962596	0.98	22200645	22158937
γT3	6_150149173	6	150149173	Zm00001d038165	150159091	150161690	+		Putative GID1-like gibberellin receptor	gene	protein_coding		-9918			9918	0.000590659	0.0017515	110	0.496928	1.52921e-05	176	0.498245	NAM_JL_32	αT, γT3, ΣT3, ΣTT3	6_137234579	0.64	12914594	12924512
δT	5_136669746	5	136669746	Zm00001d015984	136647323	136655750	+		Transcription factor bHLH133	gene	protein_coding		22423	δT_3	5_137001038	13996	3.18767e-14	4.7576e-05	8	0.0361402	6.37414e-17	1	0.00284584	NAM_JL_26	δT, γT, ΣT, δT3, γT3, ΣT3, ΣTT3	5_146752702	0.7	10082956	10096952
δT	5_136835110	5	136835110	Zm00001d015985	136805708	136822194	+	sucrose export defective1	Probable tocopherol cyclase%252C chloroplastic	gene	protein_coding	Yes	29402	δT_3	5_137001038	12916	2.16107e-15	0.111071	2744	12.3961	8.87298e-15	2	0.00569168	NAM_JL_26	δT, γT, ΣT, δT3, γT3, ΣT3, ΣTT3	5_146752702	0.7	9917592	9930508
δT	5_25436629	5	25436629	Zm00001d013937	25431430	25434346	-	GRMZM2G073351	Protochlorophyllide reductase C chloroplastic	gene	protein_coding	Yes	5199	δT_2	5_25436629	2283	1.02801e-11	3.67214e-05	6	0.0271052	1.37836e-14	3	0.00853752	NAM_JL_24	αT, δT, γT, ΣT, δT3, γT3, ΣTT3	5_25433577	0.54	3052	within
δT	5_210390225	5	210390225	Zm00001d017937	210385310	210401948	-		S-adenosylmethionine carrier 1 chloroplastic/mitochondrial	gene	protein_coding		4915	δT_5	5_210390225	within	7.25914e-11	2.34283e-05	2	0.00903506	5.95375e-14	4	0.0113834	NAM_JL_29	δT, δT3, ΣTT3	5_210187211	0.27	203014	198099
δT	5_137001038	5	137001038	Zm00001d015987	137034603	137036596	-		Pentatricopeptide repeat-containing protein	gene	protein_coding		-33565	δT_3	5_137001038	33565	2.02914e-15	1			7.06774e-14	5	0.0142292	NAM_JL_26	δT, γT, ΣT, δT3, γT3, ΣT3, ΣTT3	5_146752702	0.7	9751664	9716106
δT	5_137116441	5	137116441	Zm00001d015988	137084108	137087008	-		Cytochrome c-type biogenesis CcmH-like mitochondrial protein	gene	protein_coding		32333	δT_3	5_137001038	29433	4.60377e-15	0.635831	14260	64.4199	1.00886e-13	6	0.017075	NAM_JL_26	δT, γT, ΣT, δT3, γT3, ΣT3, ΣTT3	5_146752702	0.7	9636261	9665694
δT	5_137288361	5	137288361	Zm00001d001647	137192143	137192448	+			ncRNA_gene	lincRNA		96218	δT_3	5_137001038	95913	5.7157e-15	1			1.93165e-13	7	0.0199209	NAM_JL_26	δT, γT, ΣT, δT3, γT3, ΣT3, ΣTT3	5_146752702	0.7	9464341	9560254
δT	5_137799196	5	137799196	Zm00001d015992	137788352	137823207	-			gene	protein_coding		10844	δT_3	5_137001038	within	1.41437e-13	0.057066	1479	6.68142	2.69986e-13	8	0.0227667	NAM_JL_26	δT, γT, ΣT, δT3, γT3, ΣT3, ΣTT3	5_146752702	0.7	8953506	8929495
δT	5_136923751	5	136923751	Zm00001d015986	136921862	136930137	+	pco137163	Isochorismatase family protein rutB	gene	protein_coding		1889	δT_3	5_137001038	within	2.797e-14	0.734801	16310	73.6809	6.68277e-13	9	0.0256126	NAM_JL_26	δT, γT, ΣT, δT3, γT3, ΣT3, ΣTT3	5_146752702	0.7	9828951	9822565
δT	5_137291742	5	137291742	Zm00001d015989	137384652	137389162	-		BSD domain-containing protein	gene	protein_coding		-92910	δT_3	5_137001038	92910	3.95008e-14	1			1.25859e-12	10	0.0284584	NAM_JL_26	δT, γT, ΣT, δT3, γT3, ΣT3, ΣTT3	5_146752702	0.7	9460960	9363540
δT	1_231124391	1	231124391	Zm00001d032576	231120510	231123615	-	GRMZM2G036455	Protochlorophyllide reductase C chloroplastic	gene	protein_coding	Yes	3881	δT_1	1_231340651	776	6.40028e-09	2.40097e-05	3	0.0135526	4.6875e-12	11	0.0313042	NAM_JL_5	αT, δT, γT, ΣT, δT3, γT3, ΣTT3	1_230913509	0.73	210882	207001
δT	5_210377176	5	210377176	Zm00001d017935	210378851	210382756	+		zinc ion binding	gene	protein_coding		-1675			1675	4.18528e-05	5.57185e-09	1	0.00451753	7.0162e-12	12	0.0341501	NAM_JL_29	δT, δT3, ΣTT3	5_210187211	0.27	189965	191640
δT	5_137589276	5	137589276	Zm00001d015990	137506224	137522034	+	CPP-transcription factor 9	Protein tesmin/TSO1-like CXC 5	gene	protein_coding		83052	δT_3	5_137001038	67242	1.70192e-11	0.0148769	409	1.84767	7.59695e-12	13	0.0369959	NAM_JL_26	δT, γT, ΣT, δT3, γT3, ΣT3, ΣTT3	5_146752702	0.7	9163426	9230668
δT	5_138086861	5	138086861	Zm00001d015995	138116314	138117902	+			gene	protein_coding		-29453	δT_3	5_137001038	29453	1.89327e-11	1			4.86383e-10	14	0.0398418	NAM_JL_26	δT, γT, ΣT, δT3, γT3, ΣT3, ΣTT3	5_146752702	0.7	8665841	8634800
δT	5_25179181	5	25179181	Zm00001d013933	25177803	25179923	-		CBS domain-containing protein CBSX5	gene	protein_coding		1378	δT_2	5_25436629	within	7.15223e-08	0.00029166	18	0.0813155	5.33879e-10	15	0.0426876	NAM_JL_24	αT, δT, γT, ΣT, δT3, γT3, ΣTT3	5_25433577	0.54	254396	253654
δT	5_25518275	5	25518275	Zm00001d013940	25518163	25523534	+		Nucleolar complex protein 2 homolog	gene	protein_coding		112	δT_2	5_25436629	within	2.67562e-10	0.139594	3389	15.3099	9.34153e-10	16	0.0455335	NAM_JL_24	αT, δT, γT, ΣT, δT3, γT3, ΣTT3	5_25433577	0.54	84698	84586
δT	5_210390225	5	210390225	Zm00001d017938	210394620	210401155	+		Putative dual specificity protein phosphatase DSP8	gene	protein_coding		-4395	δT_5	5_210390225	4395	7.25914e-11	1			1.76732e-09	17	0.0483793	NAM_JL_29	δT, δT3, ΣTT3	5_210187211	0.27	203014	207409
δT	5_205742470	5	205742470	Zm00001d017742	205734245	205737675	-	GRF-transcription factor 6	Growth-regulating factor 6	gene	protein_coding		8225	δT_4	5_205742470	4795	1.10303e-07	0.000765027	35	0.158113	2.04174e-09	18	0.0512251	NAM_JL_28	αT, γT, αT3, γT3			0
δT	1_231647351	1	231647351	Zm00001d032600	231640138	231644331	-		RING/U-box superfamily protein	gene	protein_coding		7213	δT_1	1_231340651	3020	3.29485e-09	0.0402901	1062	4.79761	3.15182e-09	19	0.054071	NAM_JL_5	αT, δT, γT, ΣT, δT3, γT3, ΣTT3	1_230913509	0.73	733842	726629
δT	1_231046105	1	231046105	Zm00001d032575	231049610	231065263	-		WAPL (Wings apart-like protein regulation of heterochromatin) protein	gene	protein_coding		-3505	δT_1	1_231340651	3505	1.19331e-08	0.0525147	1354	6.11673	1.3906e-08	20	0.0569168	NAM_JL_5	αT, δT, γT, ΣT, δT3, γT3, ΣTT3	1_230913509	0.73	132596	136101
δT	5_138120368	5	138120368	Zm00001d015997	138120817	138128265	+			gene	protein_coding		-449	δT_3	5_137001038	449	1.05984e-08	0.082582	2086	9.42356	1.91296e-08	21	0.0597627	NAM_JL_26	δT, γT, ΣT, δT3, γT3, ΣT3, ΣTT3	5_146752702	0.7	8632334	8624437
δT	1_230673989	1	230673989	Zm00001d032566	230666267	230672973	-			gene	protein_coding		7722			1016	8.08426e-07	0.00112904	50	0.225876	1.99111e-08	22	0.0626085	NAM_JL_5	αT, δT, γT, ΣT, δT3, γT3, ΣTT3	1_230913509	0.73	239520	240536
δT	1_231340651	1	231340651	Zm00001d032587	231348416	231372317	+		DNA-directed RNA polymerase I subunit 2	gene	protein_coding		-7765	δT_1	1_231340651	7765	1.45162e-09	0.689779	15373	69.448	2.17501e-08	23	0.0654543	NAM_JL_5	αT, δT, γT, ΣT, δT3, γT3, ΣTT3	1_230913509	0.73	427142	434907
δT	1_230962424	1	230962424	Zm00001d032572	230960883	230963337	-		LanC-like protein 2	gene	protein_coding		1541	δT_1	1_231340651	within	2.60032e-08	0.038687	1022	4.61691	2.18473e-08	24	0.0683002	NAM_JL_5	αT, δT, γT, ΣT, δT3, γT3, ΣTT3	1_230913509	0.73	48915	47374
δT	5_25545001	5	25545001	Zm00001d013944	25544795	25545626	+			gene	protein_coding		206	δT_2	5_25436629	within	1.07971e-09	1			2.3372e-08	25	0.071146	NAM_JL_24	αT, δT, γT, ΣT, δT3, γT3, ΣTT3	5_25433577	0.54	111424	111218
δT	5_25534731	5	25534731	Zm00001d013941	25536275	25537969	+		Pentatricopeptide repeat-containing protein chloroplastic	gene	protein_coding		-1544	δT_2	5_25436629	1544	1.20996e-09	1			2.60536e-08	26	0.0739919	NAM_JL_24	αT, δT, γT, ΣT, δT3, γT3, ΣTT3	5_25433577	0.54	101154	102698
δT	5_136411636	5	136411636	Zm00001d015980	136449635	136450929	+			gene	protein_coding		-37999	δT_3	5_137001038	37999	1.41906e-09	1			3.03299e-08	27	0.0768377	NAM_JL_26	δT, γT, ΣT, δT3, γT3, ΣT3, ΣTT3	5_146752702	0.7	10341066	10301773
δT	5_138869089	5	138869089	Zm00001d016002	138880745	138886155	+		Gamma-secretase subunit APH1-like	gene	protein_coding		-11656	δT_3	5_137001038	11656	1.12061e-08	0.214532	5061	22.8632	5.01152e-08	28	0.0796835	NAM_JL_26	δT, γT, ΣT, δT3, γT3, ΣT3, ΣTT3	5_146752702	0.7	7883613	7866547
δT	1_230858857	1	230858857	Zm00001d032570	230853577	230855383	-		soluble epoxide hydrolase	gene	protein_coding		5280			3474	3.11316e-07	0.00967537	288	1.30105	6.21114e-08	29	0.0825294	NAM_JL_5	αT, δT, γT, ΣT, δT3, γT3, ΣTT3	1_230913509	0.73	54652	58126
δT	4_199331687	4	199331687	Zm00001d052735	199333912	199344027	+		Plant UBX domain-containing protein 8	gene	protein_coding		-2225			2225	1.07233e-05	0.000314667	20	0.0903506	6.91964e-08	30	0.0853752					0
δT	5_133587194	5	133587194	Zm00001d015948	133565009	133578292	-		ATP-dependent Clp protease ATP-binding subunit clpX	gene	protein_coding		22185	δT_3	5_137001038	8902	4.07206e-08	0.0903564	2259	10.2051	7.51346e-08	31	0.0882211	NAM_JL_26	δT, γT, ΣT, δT3, γT3, ΣT3, ΣTT3	5_146752702	0.7	13165508	13174410
δT	1_231673279	1	231673279	Zm00001d032601	231674392	231677680	-		ABC transporter G family member 11	gene	protein_coding		-1113	δT_1	1_231340651	1113	6.23687e-09	0.620077	13907	62.8253	7.87805e-08	32	0.0910669	NAM_JL_5	αT, δT, γT, ΣT, δT3, γT3, ΣTT3	1_230913509	0.73	759770	760883
δT	1_231458031	1	231458031	Zm00001d032591	231449534	231455154	+		Endosomal targeting BRO1-like domain-containing protein	gene	protein_coding		8497	δT_1	1_231340651	2877	3.81546e-08	0.114801	2829	12.7801	8.86824e-08	33	0.0939127	NAM_JL_5	αT, δT, γT, ΣT, δT3, γT3, ΣTT3	1_230913509	0.73	544522	536025
δT	1_231151686	1	231151686	Zm00001d032578	231149171	231150619	+	C2C2-Dof-transcription factor 13	Dof zinc finger protein DOF1.6	gene	protein_coding		2515			1067	3.21053e-07	0.0153262	420	1.89736	9.9049e-08	34	0.0967586	NAM_JL_5	αT, δT, γT, ΣT, δT3, γT3, ΣTT3	1_230913509	0.73	238177	235662
δT	5_136001201	5	136001201	Zm00001d015977	135998432	136000046	-		Xyloglucan endotransglucosylase/hydrolase protein 26	gene	protein_coding		2769	δT_3	5_137001038	1155	6.10522e-09	0.930141	20603	93.0746	1.13498e-07	35	0.0996044	NAM_JL_26	δT, γT, ΣT, δT3, γT3, ΣT3, ΣTT3	5_146752702	0.7	10751501	10752656
δT	5_205890339	5	205890339	Zm00001d017752	205893484	205894854	-		Transcription factor GT-3b	gene	protein_coding		-3145	δT_4	5_205742470	3145	1.30233e-07	0.0525252	1356	6.12577	1.35446e-07	36	0.10245	NAM_JL_28	αT, γT, αT3, γT3			0
δT	1_230983282	1	230983282	Zm00001d032573	230979145	230982119	-		Probable prolyl 4-hydroxylase 3	gene	protein_coding		4137	δT_1	1_231340651	1163	8.52149e-09	0.958266	21231	95.9116	1.60241e-07	37	0.105296	NAM_JL_5	αT, δT, γT, ΣT, δT3, γT3, ΣTT3	1_230913509	0.73	69773	65636
δT	5_25230714	5	25230714	Zm00001d013935	25228457	25241728	-		WAPL (Wings apart-like protein regulation of heterochromatin) protein	gene	protein_coding		2257	δT_2	5_25436629	within	2.32793e-08	0.364588	8359	37.762	1.66222e-07	38	0.108142	NAM_JL_24	αT, δT, γT, ΣT, δT3, γT3, ΣTT3	5_25433577	0.54	202863	191849
δT	5_25188756	5	25188756	Zm00001d013934	25185480	25187200	-		soluble epoxide hydrolase	gene	protein_coding		3276	δT_2	5_25436629	1556	4.69029e-08	0.186806	4418	19.9584	1.71317e-07	39	0.110988	NAM_JL_24	αT, δT, γT, ΣT, δT3, γT3, ΣTT3	5_25433577	0.54	244821	246377
δT	5_25542081	5	25542081	Zm00001d013943	25539709	25540838	-		FIP1	gene	protein_coding		2372	δT_2	5_25436629	1243	1.39081e-08	0.631615	14167	63.9998	1.7174e-07	40	0.113834	NAM_JL_24	αT, δT, γT, ΣT, δT3, γT3, ΣTT3	5_25433577	0.54	108504	106132
δT	5_136611051	5	136611051	Zm00001d015982	136640695	136645961	+			gene	protein_coding		-29644	δT_3	5_137001038	29644	8.85546e-09	1			1.73056e-07	41	0.116679	NAM_JL_26	δT, γT, ΣT, δT3, γT3, ΣT3, ΣTT3	5_146752702	0.7	10141651	10106741
δT	5_138120368	5	138120368	Zm00001d015998	138127458	138130706	-		General transcription factor 2-related zinc finger protein	gene	protein_coding		-7090	δT_3	5_137001038	7090	1.05984e-08	1			2.05212e-07	42	0.119525	NAM_JL_26	δT, γT, ΣT, δT3, γT3, ΣT3, ΣTT3	5_146752702	0.7	8632334	8621996
δT	5_133986802	5	133986802	Zm00001d015955	133998288	134004395	+		Topoisomerase II-associated protein PAT1	gene	protein_coding		-11486	δT_3	5_137001038	11486	7.06893e-08	0.160617	3838	17.3383	2.19058e-07	43	0.122371	NAM_JL_26	δT, γT, ΣT, δT3, γT3, ΣT3, ΣTT3	5_146752702	0.7	12765900	12748307
δT	5_26160680	5	26160680	Zm00001d013957	26165521	26170988	-		Ser/Thr protein phosphatase family	gene	protein_coding		-4841	δT_2	5_25436629	4841	4.91782e-08	0.232258	5488	24.7922	2.20305e-07	44	0.125217	NAM_JL_24	αT, δT, γT, ΣT, δT3, γT3, ΣTT3	5_25433577	0.54	727103	731944
δT	1_230571026	1	230571026	Zm00001d032562	230560853	230563661	-		evolutionarily conserved C-terminal region 2	gene	protein_coding		10173	δT_1	1_231340651	7365	4.05099e-08	0.478857	10858	49.0513	3.63878e-07	45	0.128063	NAM_JL_5	αT, δT, γT, ΣT, δT3, γT3, ΣTT3	1_230913509	0.73	342483	349848
δT	5_90062542	5	90062542	Zm00001d015435	90052984	90074741	-		Protein STRUBBELIG-RECEPTOR FAMILY 1	gene	protein_coding		9558			within	8.15106e-06	0.00321858	107	0.483375	4.84195e-07	46	0.130909	NAM_JL_26	δT, γT, ΣT, δT3, γT3, ΣT3, ΣTT3	5_146752702	0.7	56690160	56677961
δT	1_230537061	1	230537061	Zm00001d022932	230536285	230537257	+			ncRNA_gene	lincRNA		776	δT_1	1_231340651	within	3.11302e-08	1			5.69218e-07	47	0.133755	NAM_JL_5	αT, δT, γT, ΣT, δT3, γT3, ΣTT3	1_230913509	0.73	376448	376252
δT	5_25623074	5	25623074	Zm00001d013947	25632561	25633358	-		NHL25	gene	protein_coding		-9487	δT_2	5_25436629	9487	3.32849e-08	1			6.0639e-07	48	0.1366	NAM_JL_24	αT, δT, γT, ΣT, δT3, γT3, ΣTT3	5_25433577	0.54	189497	198984
δT	1_231406358	1	231406358	Zm00001d032588	231396624	231401913	-		Succinate dehydrogenase subunit 3-2 mitochondrial	gene	protein_coding		9734	δT_1	1_231340651	4445	4.61671e-08	0.744953	16518	74.6205	6.25438e-07	49	0.139446	NAM_JL_5	αT, δT, γT, ΣT, δT3, γT3, ΣTT3	1_230913509	0.73	492849	483115
δT	1_230539545	1	230539545	Zm00001d022934	230537327	230539727	+			ncRNA_gene	lincRNA		2218	δT_1	1_231340651	within	3.50835e-08	1			6.3731e-07	50	0.142292	NAM_JL_5	αT, δT, γT, ΣT, δT3, γT3, ΣTT3	1_230913509	0.73	373964	373782
δT	1_230539545	1	230539545	Zm00001d022933	230537327	230537769	+			ncRNA_gene	lincRNA		2218	δT_1	1_231340651	1776	3.50835e-08	1			6.3731e-07	51	0.145138	NAM_JL_5	αT, δT, γT, ΣT, δT3, γT3, ΣTT3	1_230913509	0.73	373964	375740
δT	5_219432437	5	219432437	Zm00001d018371	219425678	219440046	-		Formin-like protein 18	gene	protein_coding		6759			within	7.38975e-06	0.00521088	175	0.790567	6.95916e-07	52	0.147984					0
δT	1_230837360	1	230837360	Zm00001d032569	230852598	230853237	-		Ras-related protein RABA6a	gene	protein_coding		-15238	δT_1	1_231340651	15238	3.91865e-08	1			7.07509e-07	53	0.15083	NAM_JL_5	αT, δT, γT, ΣT, δT3, γT3, ΣTT3	1_230913509	0.73	76149	60272
δT	1_231213175	1	231213175	Zm00001d032582	231197140	231210494	-			gene	protein_coding		16035	δT_1	1_231340651	2681	6.69583e-08	0.615178	13808	62.378	7.4165e-07	54	0.153675	NAM_JL_5	αT, δT, γT, ΣT, δT3, γT3, ΣTT3	1_230913509	0.73	299666	283631
δT	5_134250847	5	134250847	Zm00001d015960	134287992	134290874	-		SGNH hydrolase-type esterase superfamily protein	gene	protein_coding		-37145	δT_3	5_137001038	37145	7.18193e-08	0.576955	12988	58.6737	7.45819e-07	55	0.156521	NAM_JL_26	δT, γT, ΣT, δT3, γT3, ΣT3, ΣTT3	5_146752702	0.7	12501855	12461828
δT	5_134125707	5	134125707	Zm00001d001646	134113703	134114017	+			ncRNA_gene	lincRNA		12004	δT_3	5_137001038	11690	4.27761e-08	1			7.68571e-07	56	0.159367	NAM_JL_26	δT, γT, ΣT, δT3, γT3, ΣT3, ΣTT3	5_146752702	0.7	12626995	12638685
δT	5_133774151	5	133774151	Zm00001d015952	133821714	133825615	+		E3 ubiquitin-protein ligase SINAT4	gene	protein_coding		-47563	δT_3	5_137001038	47563	8.53793e-08	0.504183	11407	51.5314	7.73162e-07	57	0.162213	NAM_JL_26	δT, γT, ΣT, δT3, γT3, ΣT3, ΣTT3	5_146752702	0.7	12978551	12927087
δT	1_231439051	1	231439051	Zm00001d032590	231427968	231433366	+			gene	protein_coding		11083	δT_1	1_231340651	5685	4.61671e-08	1			8.25975e-07	58	0.165059	NAM_JL_5	αT, δT, γT, ΣT, δT3, γT3, ΣTT3	1_230913509	0.73	525542	514459
δT	5_25007626	5	25007626	Zm00001d013927	25004008	25010095	-		Monothiol glutaredoxin-S17	gene	protein_coding		3618			within	8.07333e-07	0.0572525	1485	6.70853	8.26901e-07	59	0.167905	NAM_JL_24	αT, δT, γT, ΣT, δT3, γT3, ΣTT3	5_25433577	0.54	425951	423482
δT	9_145054433	9	145054433	Zm00001d047911	145078478	145081740	+		HVA22-like protein i	gene	protein_coding		-24045			24045	0.000360021	0.000130136	12	0.0542103	8.37531e-07	60	0.17075					0
δT	5_219154084	5	219154084	Zm00001d018358	219156200	219158425	+		Protein TIC 55 chloroplastic	gene	protein_coding		-2116			2116	8.86818e-05	0.000566904	30	0.135526	8.95168e-07	61	0.173596					0
δT	1_231174813	1	231174813	Zm00001d032579	231178877	231179514	-			gene	protein_coding		-4064	δT_1	1_231340651	4064	5.66005e-08	1			1.00111e-06	62	0.176442	NAM_JL_5	αT, δT, γT, ΣT, δT3, γT3, ΣTT3	1_230913509	0.73	261304	265368
δT	1_231548763	1	231548763	Zm00001d032597	231553045	231559488	-		Nucleic acid binding protein	gene	protein_coding		-4282	δT_1	1_231340651	4282	9.26648e-08	0.642902	14398	65.0434	1.05066e-06	63	0.179288	NAM_JL_5	αT, δT, γT, ΣT, δT3, γT3, ΣTT3	1_230913509	0.73	635254	639536
δT	5_131762696	5	131762696	Zm00001d015927	131794319	131803160	-		L-gulonolactone oxidase 3	gene	protein_coding		-31623			31623	4.12395e-07	0.152029	3645	16.4664	1.10251e-06	64	0.182134	NAM_JL_26	δT, γT, ΣT, δT3, γT3, ΣT3, ΣTT3	5_146752702	0.7	14990006	14949542
δT	1_231517855	1	231517855	Zm00001d032592	231532863	231532935	+			ncRNA_gene	tRNA		-15008	δT_1	1_231340651	15008	6.37711e-08	1			1.12033e-06	65	0.18498	NAM_JL_5	αT, δT, γT, ΣT, δT3, γT3, ΣTT3	1_230913509	0.73	604346	619354
δT	5_132082474	5	132082474	Zm00001d015929	132181261	132195639	+		GTP-binding protein TypA	gene	protein_coding		-98787	δT_3	5_137001038	98787	1.09193e-07	0.605155	13597	61.4248	1.15852e-06	66	0.187825	NAM_JL_26	δT, γT, ΣT, δT3, γT3, ΣT3, ΣTT3	5_146752702	0.7	14670228	14557063
δT	1_231213175	1	231213175	Zm00001d032583	231199003	231199076	+			ncRNA_gene	tRNA		14172	δT_1	1_231340651	14099	6.69583e-08	1			1.17306e-06	67	0.190671	NAM_JL_5	αT, δT, γT, ΣT, δT3, γT3, ΣTT3	1_230913509	0.73	299666	285494
δT	1_231213175	1	231213175	Zm00001d032584	231200272	231203229	+		Actin-11	gene	protein_coding		12903	δT_1	1_231340651	9946	6.69583e-08	1			1.17306e-06	68	0.193517	NAM_JL_5	αT, δT, γT, ΣT, δT3, γT3, ΣTT3	1_230913509	0.73	299666	286763
δT	1_231611868	1	231611868	Zm00001d022936	231609214	231610002	+			ncRNA_gene	lincRNA		2654	δT_1	1_231340651	1866	7.82899e-08	1			1.35934e-06	69	0.196363	NAM_JL_5	αT, δT, γT, ΣT, δT3, γT3, ΣTT3	1_230913509	0.73	698359	695705
δT	7_139908679	7	139908679	Zm00001d021000	139890422	139921005	-		ATPase 4 plasma membrane-type	gene	protein_coding		18257			within	0.000505779	0.000158348	14	0.0632454	1.38875e-06	70	0.199209					0
δT	1_231425128	1	231425128	Zm00001d032589	231420001	231423056	+		hAT transposon superfamily protein	gene	protein_coding		5127	δT_1	1_231340651	2072	8.07905e-08	1			1.40021e-06	71	0.202055	NAM_JL_5	αT, δT, γT, ΣT, δT3, γT3, ΣTT3	1_230913509	0.73	511619	506492
δT	5_138900871	5	138900871	Zm00001d016006	138912225	138921418	+		D-amino-acid transaminase chloroplastic	gene	protein_coding		-11354			11354	3.42171e-07	0.284381	6612	29.8699	1.66836e-06	72	0.204901	NAM_JL_26	δT, γT, ΣT, δT3, γT3, ΣT3, ΣTT3	5_146752702	0.7	7851831	7831284
δT	2_216364286	2	216364286	Zm00001d006771	216363908	216366486	+		RNA-binding (RRM/RBD/RNP motifs) family protein	gene	protein_coding		378			within	8.77631e-07	0.111758	2752	12.4322	1.68088e-06	73	0.207746	NAM_JL_12	αT, δT, γT, ΣT, ΣTT3	2_216884351	0.26	520065	517865
δT	5_132082474	5	132082474	Zm00001d001645	132181098	132181665	-			ncRNA_gene	lincRNA		-98624	δT_3	5_137001038	98624	1.09193e-07	1			1.85958e-06	74	0.210592	NAM_JL_26	δT, γT, ΣT, δT3, γT3, ΣT3, ΣTT3	5_146752702	0.7	14670228	14571037
δT	5_205890339	5	205890339	Zm00001d017751	205889941	205895577	+	organelle transcript processing51	Pentatricopeptide repeat-containing protein chloroplastic	gene	protein_coding		398	δT_4	5_205742470	within	1.30233e-07	0.864318	19149	86.5061	1.91355e-06	75	0.213438	NAM_JL_28	αT, γT, αT3, γT3			0
δT	5_133518643	5	133518643	Zm00001d015947	133563180	133564350	-			gene	protein_coding		-44537	δT_3	5_137001038	44537	1.22175e-07	1			2.06694e-06	76	0.216284	NAM_JL_26	δT, γT, ΣT, δT3, γT3, ΣT3, ΣTT3	5_146752702	0.7	13234059	13188352
δT	5_134616636	5	134616636	Zm00001d015965	134675256	134676923	-		protein%3B Tyrosine specific protein phosphatase-like	gene	protein_coding		-58620			58620	3.94419e-05	0.00319821	105	0.47434	2.13004e-06	77	0.21913	NAM_JL_26	δT, γT, ΣT, δT3, γT3, ΣT3, ΣTT3	5_146752702	0.7	12136066	12075779
δT	5_138748228	5	138748228	Zm00001d016001	138743751	138746834	-		Rop guanine nucleotide exchange factor 9	gene	protein_coding		4477	δT_3	5_137001038	1394	1.30931e-07	1			2.206e-06	78	0.221976	NAM_JL_26	δT, γT, ΣT, δT3, γT3, ΣT3, ΣTT3	5_146752702	0.7	8004474	8005868
δT	2_163096796	2	163096796	Zm00001d005195	163095556	163101315	+		RING/U-box superfamily protein	gene	protein_coding		1240			within	0.000903823	0.000147263	13	0.0587279	2.24035e-06	79	0.224821					0
δT	1_230529904	1	230529904	Zm00001d032560	230529377	230531598	-		CBS domain-containing protein CBSX5	gene	protein_coding		527			within	1.23824e-05	0.0108399	319	1.44109	2.25814e-06	80	0.227667	NAM_JL_5	αT, δT, γT, ΣT, δT3, γT3, ΣTT3	1_230913509	0.73	383605	381911
δT	5_210404965	5	210404965	Zm00001d017939	210407150	210409118	-	2C2-CO-like-transcription factor 12	Zinc finger protein CONSTANS-LIKE 7	gene	protein_coding		-2185	δT_5	5_210390225	2185	1.37306e-07	1			2.30688e-06	81	0.230513	NAM_JL_29	δT, δT3, ΣTT3	5_210187211	0.27	217754	219939
δT	1_230790335	1	230790335	Zm00001d032568	230778341	230778667	-		HR-like lesion-inducing protein-related	gene	protein_coding		11994	δT_1	1_231340651	11668	1.55599e-07	1			2.59476e-06	82	0.233359	NAM_JL_5	αT, δT, γT, ΣT, δT3, γT3, ΣTT3	1_230913509	0.73	123174	134842
δT	5_24939753	5	24939753	Zm00001d013923	24943241	24945641	+		Pentatricopeptide repeat-containing protein mitochondrial	gene	protein_coding		-3488			3488	3.09571e-07	0.503749	11397	51.4863	2.6002e-06	83	0.236205	NAM_JL_24	αT, δT, γT, ΣT, δT3, γT3, ΣTT3	5_25433577	0.54	493824	487936
δT	5_217516191	5	217516191	Zm00001d018257	217516473	217524451	+			gene	protein_coding		-282			282	0.00541803	3.05753e-05	4	0.0180701	2.75213e-06	84	0.239051					0
δT	2_216379663	2	216379663	ENSRNA049466281	216374965	216375120	+	U1	U1 spliceosomal RNA	ncRNA_gene	snRNA		4698			4543	1.67469e-07	1			2.7804e-06	85	0.241896	NAM_JL_12	αT, δT, γT, ΣT, ΣTT3	2_216884351	0.26	504688	509231
δT	5_133064529	5	133064529	Zm00001d015944	133071580	133074353	-			gene	protein_coding		-7051	δT_3	5_137001038	7051	1.70949e-07	1			2.83466e-06	86	0.244742	NAM_JL_26	δT, γT, ΣT, δT3, γT3, ΣT3, ΣTT3	5_146752702	0.7	13688173	13678349
δT	1_238805949	1	238805949	Zm00001d032804	238800382	238804865	+		Inosine triphosphate pyrophosphatase	gene	protein_coding		5567			1084	3.01495e-05	0.00636385	211	0.953198	3.15937e-06	87	0.247588	NAM_JL_5	αT, δT, γT, ΣT, δT3, γT3, ΣTT3	1_230913509	0.73	7892440	7886873
δT	5_133290770	5	133290770	Zm00001d015945	133441549	133442802	+		Topless-related protein 2	gene	protein_coding		-150779			150779	2.6107e-07	0.739518	16399	74.0829	3.17792e-06	88	0.250434	NAM_JL_26	δT, γT, ΣT, δT3, γT3, ΣT3, ΣTT3	5_146752702	0.7	13461932	13309900
δT	5_134198373	5	134198373	Zm00001d015959	134191551	134191623	-			ncRNA_gene	tRNA		6822			6750	2.18497e-07	1			3.56947e-06	89	0.25328	NAM_JL_26	δT, γT, ΣT, δT3, γT3, ΣT3, ΣTT3	5_146752702	0.7	12554329	12561079
δT	5_136136681	5	136136681	Zm00001d015978	136230053	136230125	+			ncRNA_gene	tRNA		-93372			93372	2.25228e-07	1			3.6726e-06	90	0.256126	NAM_JL_26	δT, γT, ΣT, δT3, γT3, ΣT3, ΣTT3	5_146752702	0.7	10616021	10522577
δT	5_25313791	5	25313791	Zm00001d013936	25242212	25245116	+			gene	protein_coding		71579			68675	2.39603e-07	1			3.89218e-06	91	0.258972	NAM_JL_24	αT, δT, γT, ΣT, δT3, γT3, ΣTT3	5_25433577	0.54	119786	188461
δT	5_131198030	5	131198030	Zm00001d015917	131162542	131163113	-		Nucleic acid-binding OB-fold-like protein	gene	protein_coding		35488			34917	7.57446e-07	0.323107	7454	33.6737	3.97037e-06	92	0.261817	NAM_JL_26	δT, γT, ΣT, δT3, γT3, ΣT3, ΣTT3	5_146752702	0.7	15554672	15589589
δT	6_120540926	6	120540926	Zm00001d037315	120615193	120635200	+	NAC-transcription factor 8	NAC domain-containing protein 8	gene	protein_coding		-74267			74267	2.49965e-05	0.0103149	302	1.36429	4.16944e-06	93	0.264663	NAM_JL_31	δT, γT, ΣT, αT3, δT3, ΣTT3	6_113736905	0.48	6804021	6878288
δT	5_136519206	5	136519206	Zm00001d015981	136452942	136454620	+		ADP-ribosylation factor GTPase-activating protein AGD3	gene	protein_coding		66264			64586	3.16249e-07	1			5.04946e-06	94	0.267509	NAM_JL_26	δT, γT, ΣT, δT3, γT3, ΣT3, ΣTT3	5_146752702	0.7	10233496	10298082
δT	5_135537288	5	135537288	Zm00001d015973	135539837	135544859	+			gene	protein_coding		-2549			2549	6.50548e-07	0.514851	11641	52.5885	5.32859e-06	95	0.270355	NAM_JL_26	δT, γT, ΣT, δT3, γT3, ΣT3, ΣTT3	5_146752702	0.7	11215414	11207843
δT	5_33217546	5	33217546	Zm00001d014123	33202990	33204555	+		peroxidase 13	gene	protein_coding		14556			12991	3.47172e-07	1			5.51081e-06	96	0.273201					0
δT	5_210500538	5	210500538	Zm00001d017941	210498173	210500108	+		3-ketoacyl-CoA synthase 5	gene	protein_coding		2365			430	5.69508e-06	0.0705374	1811	8.18124	6.31799e-06	97	0.276047	NAM_JL_29	δT, δT3, ΣTT3	5_210187211	0.27	313327	310962
δT	5_168234563	5	168234563	Zm00001d016581	168223687	168255407	+		DNA polymerase epsilon catalytic subunit A	gene	protein_coding		10876			within	0.011626	3.46412e-05	5	0.0225876	6.33304e-06	98	0.278892					0
δT	5_131964762	5	131964762	Zm00001d001644	131921585	131922429	+			ncRNA_gene	lincRNA		43177			42333	4.21719e-07	1			6.6121e-06	99	0.281738	NAM_JL_26	δT, γT, ΣT, δT3, γT3, ΣT3, ΣTT3	5_146752702	0.7	14787940	14830273
δT	5_210384138	5	210384138	Zm00001d017936	210382851	210383930	-		Basic blue protein	gene	protein_coding		1287			208	4.2883e-07	1			6.71643e-06	100	0.284584	NAM_JL_29	δT, δT3, ΣTT3	5_210187211	0.27	196927	195640
δT	5_133007973	5	133007973	Zm00001d015943	132990124	132991039	+			gene	protein_coding		17849			16934	4.51012e-07	1			7.04109e-06	101	0.28743	NAM_JL_26	δT, γT, ΣT, δT3, γT3, ΣT3, ΣTT3	5_146752702	0.7	13744729	13761663
δT	5_135641118	5	135641118	Zm00001d015974	135675287	135687534	-		Leucine Rich Repeat family protein	gene	protein_coding		-34169			34169	5.35113e-07	0.882944	19566	88.39	7.35421e-06	102	0.290276	NAM_JL_26	δT, γT, ΣT, δT3, γT3, ΣT3, ΣTT3	5_146752702	0.7	11111584	11065168
δT	5_134146374	5	134146374	Zm00001d015956	134163807	134172264	+		NAD(P)-binding Rossmann-fold superfamily protein	gene	protein_coding		-17433			17433	6.96566e-07	0.716069	15940	72.0094	7.73676e-06	103	0.293122	NAM_JL_26	δT, γT, ΣT, δT3, γT3, ΣT3, ΣTT3	5_146752702	0.7	12606328	12580438
δT	4_146407660	4	146407660	Zm00001d051157	146405890	146410901	-		Adenosine kinase 2	gene	protein_coding		1770			within	0.000159623	0.00320459	106	0.478858	7.92141e-06	104	0.295967	NAM_JL_21	δT, γT, ΣT, αT3, δT3, γT3, ΣT3, ΣTT3	4_28551570	0.24	117856090	117854320
δT	5_132636454	5	132636454	Zm00001d015934	132637131	132639444	-		Pectinesterase-2	gene	protein_coding		-677			677	1.54406e-06	0.337777	7780	35.1464	8.06649e-06	105	0.298813	NAM_JL_26	δT, γT, ΣT, δT3, γT3, ΣT3, ΣTT3	5_146752702	0.7	14116248	14113258
δT	7_139609751	7	139609751	Zm00001d020989	139575199	139624018	+		Light-mediated development protein DET1	gene	protein_coding		34552			within	0.000116603	0.00449104	153	0.691182	8.09719e-06	106	0.301659					0
δT	1_230712698	1	230712698	Zm00001d032567	230714286	230732552	-		Mediator of RNA polymerase II transcription subunit 16	gene	protein_coding		-1588			1588	7.5522e-07	0.766027	16963	76.6308	8.88767e-06	107	0.304505	NAM_JL_5	αT, δT, γT, ΣT, δT3, γT3, ΣTT3	1_230913509	0.73	200811	180957
δT	5_205823905	5	205823905	Zm00001d017746	205825586	205829216	+	vitamin E synthesis4	vitamin E synthesis4	gene	protein_coding	Yes	-1681			1681	1.20335e-06	0.493154	11167	50.4472	9.10174e-06	108	0.307351	NAM_JL_28	αT, γT, αT3, γT3			0
δT	5_26657107	5	26657107	Zm00001d013967	26610074	26621214	-		Myosin-3	gene	protein_coding		47033			35893	2.78835e-06	0.217278	5130	23.1749	9.27954e-06	109	0.310197	NAM_JL_24	αT, δT, γT, ΣT, δT3, γT3, ΣTT3	5_25433577	0.54	1223530	1176497
δT	4_148899264	4	148899264	Zm00001d051214	148918694	148925044	+	nitrilase2	nitrilase2	gene	protein_coding		-19430			19430	6.85276e-05	0.00909215	273	1.23329	9.52577e-06	110	0.313042	NAM_JL_21	δT, γT, ΣT, αT3, δT3, γT3, ΣT3, ΣTT3	4_28551570	0.24	120347694	120367124
δT	8_12663743	8	12663743	Zm00001d008548	12671727	12672398	-	wound induced protein1	Bowman-Birk type wound-induced proteinase inhibitor WIP1	gene	protein_coding		-7984			7984	0.000556044	0.00121906	52	0.234911	1.03063e-05	111	0.315888					0
δT	5_133597832	5	133597832	Zm00001d015949	133613890	133616064	+			gene	protein_coding		-16058			16058	6.96566e-07	1			1.05719e-05	112	0.318734	NAM_JL_26	δT, γT, ΣT, δT3, γT3, ΣT3, ΣTT3	5_146752702	0.7	13154870	13136638
δT	5_133645033	5	133645033	Zm00001d015951	133630615	133632211	+		Serine/threonine-protein kinase Nek1	gene	protein_coding		14418			12822	6.96566e-07	1			1.05719e-05	113	0.32158	NAM_JL_26	δT, γT, ΣT, δT3, γT3, ΣT3, ΣTT3	5_146752702	0.7	13107669	13120491
δT	8_146990233	8	146990233	Zm00001d011330	146957682	146961482	+		Cytochrome c oxidase subunit 5b-2 mitochondrial	gene	protein_coding		32551			28751	1.24725e-06	0.596352	13408	60.571	1.124e-05	114	0.324426	NAM_JL_41	αT, γT, ΣT, δT3, ΣTT3			0
δT	5_220733608	5	220733608	Zm00001d018432	220722065	220725258	+		SAP-like protein BP-73	gene	protein_coding		11543			8350	6.99667e-06	0.106613	2636	11.9082	1.12701e-05	115	0.327272					0
δT	9_92546500	9	92546500	Zm00001d046499	92565565	92566347	-		DNA binding%3BDNA-directed RNA polymerases	gene	protein_coding		-19065			19065	0.000278038	0.00275115	91	0.411095	1.15378e-05	116	0.330118	NAM_JL_45	αT, δT, γT, ΣT, αT3, δT3, γT3, ΣT3, ΣTT3	9_28530922	0.22	64015578	64034643
δT	5_26134678	5	26134678	Zm00001d013956	26132024	26133292	+	tonoplast intrinsic protein3	tonoplast intrinsic protein3	gene	protein_coding		2654			1386	8.60393e-07	0.957798	21216	95.8439	1.23687e-05	117	0.332963	NAM_JL_24	αT, δT, γT, ΣT, δT3, γT3, ΣTT3	5_25433577	0.54	701101	698447
δT	8_17730330	8	17730330	Zm00001d008720	17728577	17733628	+		Adenine nucleotide alpha hydrolases-like superfamily protein	gene	protein_coding		1753			within	4.2785e-05	0.0192883	518	2.34008	1.2385e-05	118	0.335809					0
δT	1_238563551	1	238563551	Zm00001d032801	238596562	238629956	-		chromatin complex subunit A	gene	protein_coding		-33011			33011	4.01079e-06	0.205791	4867	21.9868	1.23869e-05	119	0.338655	NAM_JL_5	αT, δT, γT, ΣT, δT3, γT3, ΣTT3	1_230913509	0.73	7650042	7683053
δT	4_195517280	4	195517280	Zm00001d052639	195500434	195501450	-		Putative RING zinc finger domain superfamily protein	gene	protein_coding		16846			15830	9.2109e-07	1			1.37221e-05	120	0.341501					0
δT	8_17875989	8	17875989	Zm00001d008724	17871316	17876968	-		Protein NSP-INTERACTING KINASE 3	gene	protein_coding		4673			within	0.0135515	6.81471e-05	9	0.0406578	1.37556e-05	121	0.344347					0
δT	5_25547183	5	25547183	Zm00001d013945	25546118	25546714	-		Ripening-related protein 3	gene	protein_coding		1065			469	9.25095e-07	1			1.37778e-05	122	0.347193	NAM_JL_24	αT, δT, γT, ΣT, δT3, γT3, ΣTT3	5_25433577	0.54	113606	112541
δT	5_210505957	5	210505957	Zm00001d017942	210507670	210509638	-			gene	protein_coding		-1713			1713	9.59972e-07	1			1.42617e-05	123	0.350038	NAM_JL_29	δT, δT3, ΣTT3	5_210187211	0.27	318746	320459
δT	1_230862687	1	230862687	Zm00001d032571	230863189	230864361	-		LisH/CRA/RING-U-box domains-containing protein	gene	protein_coding		-502			502	1.08791e-06	0.901094	19943	90.0931	1.45432e-05	124	0.352884	NAM_JL_5	αT, δT, γT, ΣT, δT3, γT3, ΣTT3	1_230913509	0.73	50822	49148
δT	5_86780151	5	86780151	Zm00001d015372	86733894	86746224	-		CONTAINS InterPro DOMAIN/s: Ribonuclease H2 subunit C (InterPro:IPR013924)%3B Has 30201 Blast hits to 17322 proteins in 780 species: Archae - 12%3B Bacteria - 1396%3B Metazoa - 17338%3B Fungi - 3422%3B Plants - 5037%3B Viruses - 0%3B Other Eukaryotes - 2996 (sou /.../CBI BLink).	gene	protein_coding		46257			33927	5.30724e-06	0.185778	4400	19.8771	1.46216e-05	125	0.35573	NAM_JL_26	δT, γT, ΣT, δT3, γT3, ΣT3, ΣTT3	5_146752702	0.7	59972551	60006478
δT	5_91491004	5	91491004	Zm00001d015459	91459227	91463857	-	coumarate ligase1	4-coumarate--CoA ligase 1	gene	protein_coding		31777			27147	0.000292047	0.00338898	116	0.524033	1.46737e-05	126	0.358576	NAM_JL_26	δT, γT, ΣT, δT3, γT3, ΣT3, ΣTT3	5_146752702	0.7	55261698	55288845
δT	10_111113508	10	111113508	Zm00001d025251	111149589	111152196	+		OSJNBa0055C08.12 protein	gene	protein_coding		-36081			36081	2.06471e-05	0.0483729	1250	5.64691	1.47984e-05	127	0.361422	NAM_JL_51	αT3, ΣT3			0
δT	5_198870565	5	198870565	Zm00001d017529	198871925	198872722	+		copper ion binding	gene	protein_coding		-1360			1360	3.57121e-05	0.0279699	745	3.36556	1.47998e-05	128	0.364268	NAM_JL_27	δT	5_198876386	0.27	5821	3664
δT	2_216145684	2	216145684	Zm00001d006761	216138693	216139439	+		EID1-like F-box protein 2	gene	protein_coding		6991			6245	3.0735e-06	0.346313	7955	35.9369	1.57031e-05	129	0.367113	NAM_JL_12	αT, δT, γT, ΣT, ΣTT3	2_216884351	0.26	738667	744912
δT	5_132535018	5	132535018	Zm00001d015930	132527912	132538160	+			gene	protein_coding		7106			within	1.15738e-06	1			1.6978e-05	130	0.369959	NAM_JL_26	δT, γT, ΣT, δT3, γT3, ΣT3, ΣTT3	5_146752702	0.7	14217684	14214542
δT	5_87198240	5	87198240	Zm00001d015379	87175698	87181297	-		Splicing factor arginine/serine-rich 12	gene	protein_coding		22542			16943	5.96414e-05	0.0195603	526	2.37622	1.7104e-05	131	0.372805	NAM_JL_26	δT, γT, ΣT, δT3, γT3, ΣT3, ΣTT3	5_146752702	0.7	59554462	59571405
δT	4_37973747	4	37973747	Zm00001d049624	37970635	37973407	-		Magnesium transporter CorA-like family protein	gene	protein_coding		3112			340	9.83511e-05	0.012195	352	1.59017	1.75515e-05	132	0.375651	NAM_JL_21	δT, γT, ΣT, αT3, δT3, γT3, ΣT3, ΣTT3	4_28551570	0.24	9422177	9419065
δT	1_10755444	1	10755444	Zm00001d027674	10755659	10757365	-			gene	protein_coding		-215			215	0.000411955	0.00292797	99	0.447235	1.76442e-05	133	0.378497	NAM_JL_2	γT, δT3			0
δT	5_205849230	5	205849230	Zm00001d017747	205846897	205847565	+		General transcription factor 2-related zinc finger protein	gene	protein_coding		2333			1665	1.20992e-06	1			1.7695e-05	134	0.381343	NAM_JL_28	αT, γT, αT3, γT3			0
δT	5_132831367	5	132831367	Zm00001d015938	132830023	132830095	-			ncRNA_gene	tRNA		1344			1272	1.25721e-06	1			1.83385e-05	135	0.384189	NAM_JL_26	δT, γT, ΣT, δT3, γT3, ΣT3, ΣTT3	5_146752702	0.7	13921335	13922607
δT	5_181179607	5	181179607	Zm00001d016956	181173273	181178545	-			gene	protein_coding		6334			1062	4.35997e-05	0.029052	774	3.49657	1.84668e-05	136	0.387034					0
δT	5_26678876	5	26678876	Zm00001d013968	26695076	26698413	+		Transcription factor TFIIE alpha subunit	gene	protein_coding		-16200			16200	1.27142e-06	1			1.85314e-05	137	0.38988	NAM_JL_24	αT, δT, γT, ΣT, δT3, γT3, ΣTT3	5_25433577	0.54	1245299	1261499
δT	5_21904592	5	21904592	Zm00001d013834	21906414	21908151	+		AAA-ATPase	gene	protein_coding		-1822			1822	2.20278e-06	0.591729	13331	60.2232	1.89658e-05	138	0.392726	NAM_JL_24	αT, δT, γT, ΣT, δT3, γT3, ΣTT3	5_25433577	0.54	3528985	3525426
δT	1_255510965	1	255510965	Zm00001d033240	255510009	255515376	+		BTB/POZ domain-containing protein	gene	protein_coding		956			within	2.40651e-05	0.0566399	1469	6.63625	1.9772e-05	139	0.395572					0
δT	5_90213557	5	90213557	Zm00001d015437	90212611	90212916	-			gene	protein_coding		946			641	1.40516e-06	1			2.03401e-05	140	0.398418	NAM_JL_26	δT, γT, ΣT, δT3, γT3, ΣT3, ΣTT3	5_146752702	0.7	56539145	56539786
δT	5_131462725	5	131462725	Zm00001d015921	131469616	131471554	-		Plasma membrane-associated cation-binding protein 1	gene	protein_coding		-6891			6891	4.28762e-06	0.332865	7654	34.5772	2.0637e-05	141	0.401264	NAM_JL_26	δT, γT, ΣT, δT3, γT3, ΣT3, ΣTT3	5_146752702	0.7	15289977	15281148
δT	5_24685434	5	24685434	Zm00001d013915	24682234	24685218	+		Glutamyl-tRNA reductase 1 chloroplastic	gene	protein_coding	Yes	3200			216	1.44569e-06	1			2.08857e-05	142	0.404109	NAM_JL_24	αT, δT, γT, ΣT, δT3, γT3, ΣTT3	5_25433577	0.54	748143	748359
δT	5_134370494	5	134370494	Zm00001d015961	134439009	134443657	-		Mediator of RNA polymerase II transcription subunit 33A	gene	protein_coding		-68515			68515	2.89555e-06	0.508038	11493	51.9199	2.12266e-05	143	0.406955	NAM_JL_26	δT, γT, ΣT, δT3, γT3, ΣT3, ΣTT3	5_146752702	0.7	12382208	12309045
δT	1_230374491	1	230374491	Zm00001d032554	230369805	230381443	-		HIT-type Zinc finger family protein	gene	protein_coding		4686			within	2.36112e-06	0.625897	14022	63.3448	2.13175e-05	144	0.409801	NAM_JL_5	αT, δT, γT, ΣT, δT3, γT3, ΣTT3	1_230913509	0.73	539018	532066
δT	1_277192702	1	277192702	Zm00001d033877	277201501	277202268	+			gene	protein_coding		-8799			8799	8.30429e-05	0.0203298	558	2.52078	2.41281e-05	145	0.412647					0
δT	5_209228515	5	209228515	Zm00001d017871	209242050	209250119	+		Protein S-acyltransferase 18	gene	protein_coding		-13535			13535	3.49259e-06	0.488625	11065	49.9864	2.43715e-05	146	0.415493	NAM_JL_29	δT, δT3, ΣTT3	5_210187211	0.27	958696	937092
δT	5_205853870	5	205853870	Zm00001d017748	205851491	205853476	+		3-dehydrosphinganine reductase TSC10B	gene	protein_coding		2379			394	3.01782e-06	0.5695	12820	57.9147	2.4532e-05	147	0.418339	NAM_JL_28	αT, γT, αT3, γT3			0
δT	7_176674843	7	176674843	Zm00001d022394	176671689	176674778	+		Pentatricopeptide repeat-containing protein	gene	protein_coding		3154			65	0.000238003	0.0072469	233	1.05258	2.46133e-05	148	0.421184	NAM_JL_39	δT, δT3, ΣTT3			0
δT	4_17568455	4	17568455	Zm00001d049141	17575403	17583311	+	Aux/IAA-transcription factor 14	Auxin-responsive protein IAA26	gene	protein_coding		-6948			6948	2.69432e-05	0.0648719	1670	7.54427	2.49194e-05	149	0.42403					0
δT	3_2796160	3	2796160	Zm00001d039378	2791183	2793926	+			gene	protein_coding		4977			2234	0.000498819	0.00350621	121	0.546621	2.49341e-05	150	0.426876					0
δT	6_119013152	6	119013152	Zm00001d037273	119043969	119047721	+		Peptide methionine sulfoxide reductase msrB	gene	protein_coding		-30817			30817	1.74991e-05	0.101053	2497	11.2803	2.51908e-05	151	0.429722	NAM_JL_31	δT, γT, ΣT, αT3, δT3, ΣTT3	6_113736905	0.48	5276247	5307064
δT	1_148877486	1	148877486	Zm00001d030618	148822878	148823223	-		Cytochrome c oxidase subunit 5C	gene	protein_coding		54608			54263	0.00265496	0.000667961	34	0.153596	2.5258e-05	152	0.432568	NAM_JL_4	δT, δT3, γT3, ΣT3, ΣTT3	1_175971729	0.92	27094243	27148506
δT	5_176541265	5	176541265	Zm00001d016803	176578339	176584546	+	p15 (PC4 Sub1)-transcription factor 2	RNA polymerase II transcriptional coactivator KIWI	gene	protein_coding		-37074			37074	0.000669635	0.0027161	89	0.40206	2.58584e-05	153	0.435414					0
δT	10_144817880	10	144817880	Zm00001d026382	144818522	144822103	-		G-type lectin S-receptor-like serine/threonine-protein kinase B120	gene	protein_coding		-642			642	0.00583917	0.000317364	21	0.0948681	2.63121e-05	154	0.438259	NAM_JL_52	δT, γT, ΣT, ΣTT3	10_145558086	0.3	740206	735983
δT	1_265353522	1	265353522	Zm00001d033517	265338572	265340516	-		Major facilitator superfamily protein	gene	protein_coding		14950			13006	0.000371219	0.0050193	171	0.772497	2.64455e-05	155	0.441105	NAM_JL_6	αT3			0
δT	4_236550358	4	236550358	Zm00001d053616	236545424	236550919	+		26S protease regulatory subunit 8 homolog B	gene	protein_coding		4934			within	0.0449081	4.15922e-05	7	0.0316227	2.65059e-05	156	0.443951					0
δT	6_119869813	6	119869813	Zm00001d037297	119869360	119872972	-		BRASSINOSTEROID INSENSITIVE 1-associated receptor kinase 1%253B Putative leucine-rich repeat receptor-like protein kinase family protein	gene	protein_coding		453			within	3.51931e-05	0.0539004	1393	6.29292	2.68893e-05	157	0.446797	NAM_JL_31	δT, γT, ΣT, αT3, δT3, ΣTT3	6_113736905	0.48	6132908	6132455
δT	1_69618416	1	69618416	Zm00001d029417	69624781	69628628	-		P-loop containing nucleoside triphosphate hydrolases superfamily protein	gene	protein_coding		-6365			6365	4.04639e-05	0.047148	1216	5.49331	2.70326e-05	158	0.449643	NAM_JL_4	δT, δT3, γT3, ΣT3, ΣTT3	1_175971729	0.92	106353313	106343101
δT	5_175021150	5	175021150	Zm00001d016755	175021336	175022553	+			gene	protein_coding		-186			186	0.00115936	0.00165895	64	0.289122	2.72371e-05	159	0.452489					0
δT	7_8432222	7	8432222	Zm00001d018891	8478320	8494304	-	chloroplast RNA processing4	chloroplast RNA processing4	gene	protein_coding		-46098			46098	0.000457328	0.00429318	144	0.650524	2.7764e-05	160	0.455335					0
δT	1_230627110	1	230627110	Zm00001d032564	230626458	230626757	+			gene	protein_coding		652			353	2.00306e-06	1			2.82849e-05	161	0.45818	NAM_JL_5	αT, δT, γT, ΣT, δT3, γT3, ΣTT3	1_230913509	0.73	286399	286752
δT	3_114441030	3	114441030	Zm00001d041365	114433709	114437553	-		Bifunctional nuclease 1	gene	protein_coding		7321			3477	0.0101741	0.000199501	15	0.0677629	2.86349e-05	162	0.461026	NAM_JL_14	αT3, δT3, γT3, ΣT3			0
δT	3_219987778	3	219987778	Zm00001d044129	219979958	219989574	-	shrunken2	Glucose-1-phosphate adenylyltransferase large subunit 1%252C chloroplastic/amyloplastic	gene	protein_coding		7820			within	0.000785489	0.00258497	83	0.374955	2.86443e-05	163	0.463872					0
δT	4_199313473	4	199313473	Zm00001d052734	199304832	199310418	+		RHOMBOID-like protein 3	gene	protein_coding		8641			3055	9.79515e-05	0.0212243	578	2.61113	2.92792e-05	164	0.466718					0
δT	5_134985715	5	134985715	Zm00001d015970	134952929	134957125	-		Protein kish [Source:UniProtKB/TrEMBL%3BAcc:B6U611]	gene	protein_coding		32786			28590	5.96278e-06	0.36327	8329	37.6265	3.04176e-05	165	0.469564	NAM_JL_26	δT, γT, ΣT, δT3, γT3, ΣT3, ΣTT3	5_146752702	0.7	11766987	11795577
δT	1_230528837	1	230528837	Zm00001d032559	230528661	230528733	-			ncRNA_gene	tRNA		176			104	2.17722e-06	1			3.05626e-05	166	0.47241	NAM_JL_5	αT, δT, γT, ΣT, δT3, γT3, ΣTT3	1_230913509	0.73	384672	384776
δT	7_173181569	7	173181569	Zm00001d022228	173192813	173193915	+		Ribonuclease 1	gene	protein_coding		-11244			11244	8.89284e-05	0.0246591	667	3.01319	3.0767e-05	167	0.475255					0
δT	3_216714224	3	216714224	Zm00001d044017	216717307	216725476	-		Probable plastid-lipid-associated protein 14 chloroplastic	gene	protein_coding		-3083			3083	0.0240928	9.15715e-05	10	0.0451753	3.09405e-05	168	0.478101					0
δT	10_36554446	10	36554446	Zm00001d024009	36528738	36535462	+	cytokinin inducible protease1	Chaperone protein ClpC1 chloroplastic	gene	protein_coding		25708			18984	0.000665507	0.00336078	115	0.519516	3.13363e-05	169	0.480947	NAM_JL_49	γT, ΣT, δT3, γT3, ΣTT3			0
δT	5_196089971	5	196089971	Zm00001d017445	196086107	196090434	-		ELMO/CED-12 family protein	gene	protein_coding		3864			within	1.12511e-05	0.201018	4754	21.4763	3.16622e-05	170	0.483793	NAM_JL_27	δT	5_198876386	0.27	2786415	2785952
δT	1_274079671	1	274079671	Zm00001d033799	274078397	274085766	-	phytochromeA1	phytochromeA1	gene	protein_coding		1274			within	2.6352e-06	0.85991	19057	86.0905	3.17187e-05	171	0.486639					0
δT	1_230304303	1	230304303	Zm00001d032552	230238930	230243910	-		Protein NEOXANTHIN-DEFICIENT 1	gene	protein_coding		65373			60393	1.97677e-05	0.11469	2824	12.7575	3.17334e-05	172	0.489485	NAM_JL_5	αT, δT, γT, ΣT, δT3, γT3, ΣTT3	1_230913509	0.73	609206	669599
δT	1_303577618	1	303577618	Zm00001d034839	303573712	303576362	-		Purple acid phosphatase 15	gene	protein_coding		3906			1256	0.00130276	0.00175908	67	0.302674	3.20516e-05	173	0.49233					0
δT	8_16437919	8	16437919	Zm00001d008666	16426215	16435539	-		DCD (Development and Cell Death) domain protein	gene	protein_coding		11704			2380	0.00045892	0.00506206	172	0.777015	3.24596e-05	174	0.495176					0
δT	5_135926892	5	135926892	Zm00001d015976	135877976	135880055	+		Probable lactoylglutathione lyase chloroplastic	gene	protein_coding		48916			46837	2.33577e-06	1			3.26241e-05	175	0.498022	NAM_JL_26	δT, γT, ΣT, δT3, γT3, ΣT3, ΣTT3	5_146752702	0.7	10825810	10872647
δT3	5_138199511	5	138199511	Zm00001d015997	138120817	138128265	+			gene	protein_coding		78694	δT3_1	5_136800149	71246	1.16795e-15	6.08003e-06	2	0.00903506	3.36553e-19	1	0.00283326	NAM_JL_26	δT, γT, ΣT, δT3, γT3, ΣT3, ΣTT3			0
δT3	5_137070830	5	137070830	Zm00001d015988	137084108	137087008	-		Cytochrome c-type biogenesis CcmH-like mitochondrial protein	gene	protein_coding		-13278	δT3_1	5_136800149	13278	1.09423e-17	0.000811075	43	0.194254	4.18644e-19	2	0.00566653	NAM_JL_26	δT, γT, ΣT, δT3, γT3, ΣT3, ΣTT3			0
δT3	5_136800149	5	136800149	Zm00001d015985	136805708	136822194	+	sucrose export defective1	Probable tocopherol cyclase%252C chloroplastic	gene	protein_coding	Yes	-5559	δT3_1	5_136800149	5559	7.82513e-19	0.0260336	868	3.92121	9.44024e-19	3	0.00849979	NAM_JL_26	δT, γT, ΣT, δT3, γT3, ΣT3, ΣTT3			0
δT3	5_137794789	5	137794789	Zm00001d015992	137788352	137823207	-			gene	protein_coding		6437	δT3_1	5_136800149	within	6.71994e-16	0.0018361	82	0.370437	5.21132e-17	4	0.0113331	NAM_JL_26	δT, γT, ΣT, δT3, γT3, ΣT3, ΣTT3			0
δT3	5_137042893	5	137042893	Zm00001d015987	137034603	137036596	-		Pentatricopeptide repeat-containing protein	gene	protein_coding		8290	δT3_1	5_136800149	6297	1.82577e-18	1			7.63985e-17	5	0.0141663	NAM_JL_26	δT, γT, ΣT, δT3, γT3, ΣT3, ΣTT3			0
δT3	5_136891176	5	136891176	Zm00001d015986	136921862	136930137	+	pco137163	Isochorismatase family protein rutB	gene	protein_coding		-30686	δT3_1	5_136800149	30686	7.47689e-18	0.382786	9238	41.7329	1.18474e-16	6	0.0169996	NAM_JL_26	δT, γT, ΣT, δT3, γT3, ΣT3, ΣTT3			0
δT3	5_136703634	5	136703634	Zm00001d015984	136647323	136655750	+		Transcription factor bHLH133	gene	protein_coding		56311	δT3_1	5_136800149	47884	6.46633e-18	0.556876	12986	58.6646	1.48234e-16	7	0.0198328	NAM_JL_26	δT, γT, ΣT, δT3, γT3, ΣT3, ΣTT3			0
δT3	5_137144854	5	137144854	Zm00001d001647	137192143	137192448	+			ncRNA_gene	lincRNA		-47289	δT3_1	5_136800149	47289	3.75755e-18	1			1.54521e-16	8	0.0226661	NAM_JL_26	δT, γT, ΣT, δT3, γT3, ΣT3, ΣTT3			0
δT3	5_137526907	5	137526907	Zm00001d015990	137506224	137522034	+	CPP-transcription factor 9	Protein tesmin/TSO1-like CXC 5	gene	protein_coding		20683	δT3_1	5_136800149	4873	9.10988e-18	0.584312	13556	61.2396	2.17043e-16	9	0.0254994	NAM_JL_26	δT, γT, ΣT, δT3, γT3, ΣT3, ΣTT3			0
δT3	5_137392340	5	137392340	Zm00001d015989	137384652	137389162	-		BSD domain-containing protein	gene	protein_coding		7688	δT3_1	5_136800149	3178	6.54158e-18	1			2.65381e-16	10	0.0283326	NAM_JL_26	δT, γT, ΣT, δT3, γT3, ΣT3, ΣTT3			0
δT3	9_95909298	9	95909298	Zm00001d046558	95895575	95899061	+	homogentisate geranylgeranyl transferase1	homogentisate geranylgeranyl transferase1	gene	protein_coding	Yes	13723			10237	5.38303e-13	7.39074e-05	6	0.0271052	1.54217e-15	11	0.0311659	NAM_JL_45	αT, δT, γT, ΣT, αT3, δT3, γT3, ΣT3, ΣTT3	9_95890334	0.91	18964	5241
δT3	5_138548575	5	138548575	Zm00001d016000	138562425	138590869	+	MYB-related-transcription factor 74	Myb-related protein 3R-1	gene	protein_coding		-13850			13850	5.39032e-15	0.0363629	1162	5.24937	7.2853e-15	12	0.0339992	NAM_JL_26	δT, γT, ΣT, δT3, γT3, ΣT3, ΣTT3			0
δT3	5_135642305	5	135642305	Zm00001d015974	135675287	135687534	-		Leucine Rich Repeat family protein	gene	protein_coding		-32982			32982	1.39979e-12	0.000656139	34	0.153596	3.27188e-14	13	0.0368324	NAM_JL_26	δT, γT, ΣT, δT3, γT3, ΣT3, ΣTT3			0
δT3	5_138349396	5	138349396	Zm00001d015999	138468680	138483666	+		drug transmembrane transporters%3Bantiporters	gene	protein_coding		-119284	δT3_1	5_136800149	119284	1.82621e-15	0.584743	13562	61.2667	3.78804e-14	14	0.0396657	NAM_JL_26	δT, γT, ΣT, δT3, γT3, ΣT3, ΣTT3			0
δT3	5_138199511	5	138199511	Zm00001d015998	138127458	138130706	-		General transcription factor 2-related zinc finger protein	gene	protein_coding		72053	δT3_1	5_136800149	68805	1.16795e-15	1			4.13261e-14	15	0.0424989	NAM_JL_26	δT, γT, ΣT, δT3, γT3, ΣT3, ΣTT3			0
δT3	5_134981286	5	134981286	Zm00001d015970	134952929	134957125	-		Protein kish [Source:UniProtKB/TrEMBL%3BAcc:B6U611]	gene	protein_coding		28357			24161	1.88191e-13	0.00939075	355	1.60372	6.17998e-14	16	0.0453322	NAM_JL_26	δT, γT, ΣT, δT3, γT3, ΣT3, ΣTT3			0
δT3	9_95963918	9	95963918	Zm00001d046560	95961757	95965827	+		ATPase 8 plasma membrane-type	gene	protein_coding		2161	δT3_2	9_95963918	within	2.54158e-15	1			8.79538e-14	17	0.0481655	NAM_JL_45	αT, δT, γT, ΣT, αT3, δT3, γT3, ΣT3, ΣTT3	9_95890334	0.91	73584	71423
δT3	5_137985116	5	137985116	Zm00001d015995	138116314	138117902	+			gene	protein_coding		-131198	δT3_1	5_136800149	131198	4.52248e-15	1			1.53899e-13	18	0.0509987	NAM_JL_26	δT, γT, ΣT, δT3, γT3, ΣT3, ΣTT3			0
δT3	5_138866748	5	138866748	Zm00001d016002	138880745	138886155	+		Gamma-secretase subunit APH1-like	gene	protein_coding		-13997			13997	1.73409e-13	0.0465562	1444	6.52331	2.70052e-13	19	0.053832	NAM_JL_26	δT, γT, ΣT, δT3, γT3, ΣT3, ΣTT3			0
δT3	5_136406095	5	136406095	Zm00001d015980	136449635	136450929	+			gene	protein_coding		-43540			43540	9.89625e-15	1			3.29017e-13	20	0.0566653	NAM_JL_26	δT, γT, ΣT, δT3, γT3, ΣT3, ΣTT3			0
δT3	5_136558181	5	136558181	Zm00001d015982	136640695	136645961	+			gene	protein_coding		-82514			82514	1.02532e-14	1			3.40522e-13	21	0.0594985	NAM_JL_26	δT, γT, ΣT, δT3, γT3, ΣT3, ΣTT3			0
δT3	5_86085552	5	86085552	Zm00001d015356	86084655	86086755	-	4-hydroxyphenylpyruvate dioxygenase 1	4-hydroxyphenylpyruvate dioxygenase 1	gene	protein_coding	Yes	897			within	1.47164e-13	0.107388	3016	13.6249	5.18023e-13	22	0.0623318	NAM_JL_26	δT, γT, ΣT, δT3, γT3, ΣT3, ΣTT3			0
δT3	5_136464564	5	136464564	Zm00001d015981	136452942	136454620	+		ADP-ribosylation factor GTPase-activating protein AGD3	gene	protein_coding		11622			9944	1.99981e-14	1			6.50801e-13	23	0.065165	NAM_JL_26	δT, γT, ΣT, δT3, γT3, ΣT3, ΣTT3			0
δT3	9_95330126	9	95330126	Zm00001d046549	95423390	95429102	-		110 kDa U5 small nuclear ribonucleoprotein component CLO	gene	protein_coding		-93264			93264	1.29884e-11	0.0023677	102	0.460788	9.87549e-13	24	0.0679983	NAM_JL_45	αT, δT, γT, ΣT, αT3, δT3, γT3, ΣT3, ΣTT3	9_95890334	0.91	560208	461232
δT3	5_136270478	5	136270478	Zm00001d015979	136231044	136231116	-			ncRNA_gene	tRNA		39434			39362	3.37241e-14	1			1.07987e-12	25	0.0708316	NAM_JL_26	δT, γT, ΣT, δT3, γT3, ΣT3, ΣTT3			0
δT3	5_138923739	5	138923739	Zm00001d016006	138912225	138921418	+		D-amino-acid transaminase chloroplastic	gene	protein_coding		11514			2321	9.28957e-10	8.02672e-05	7	0.0316227	2.32844e-12	26	0.0736648	NAM_JL_26	δT, γT, ΣT, δT3, γT3, ΣT3, ΣTT3			0
δT3	5_138739600	5	138739600	Zm00001d016001	138743751	138746834	-		Rop guanine nucleotide exchange factor 9	gene	protein_coding		-4151			4151	1.57429e-13	1			4.7984e-12	27	0.0764981	NAM_JL_26	δT, γT, ΣT, δT3, γT3, ΣT3, ΣTT3			0
δT3	5_135056599	5	135056599	Zm00001d015971	135066142	135071626	-		Probable LRR receptor-like serine/threonine-protein kinase	gene	protein_coding		-9543			9543	9.06193e-12	0.017766	626	2.82797	4.90347e-12	28	0.0793314	NAM_JL_26	δT, γT, ΣT, δT3, γT3, ΣT3, ΣTT3			0
δT3	5_135967097	5	135967097	Zm00001d015977	135998432	136000046	-		Xyloglucan endotransglucosylase/hydrolase protein 26	gene	protein_coding		-31335			31335	4.45108e-13	0.481928	11380	51.4095	6.47185e-12	29	0.0821646	NAM_JL_26	δT, γT, ΣT, δT3, γT3, ΣT3, ΣTT3			0
δT3	9_97093459	9	97093459	Zm00001d046582	97130617	97158426	-			gene	protein_coding		-37158			37158	2.94768e-13	1			8.7996e-12	30	0.0849979	NAM_JL_45	αT, δT, γT, ΣT, αT3, δT3, γT3, ΣT3, ΣTT3	9_95890334	0.91	1203125	1240283
δT3	9_95827231	9	95827231	Zm00001d046555	95832622	95834867	-	embryo specific18	embryo specific18	gene	protein_coding		-5391			5391	6.3309e-11	0.00754504	301	1.35978	1.40291e-11	31	0.0878311	NAM_JL_45	αT, δT, γT, ΣT, αT3, δT3, γT3, ΣT3, ΣTT3	9_95890334	0.91	63103	55467
δT3	9_96811373	9	96811373	Zm00001d046579	96779812	96809887	+		Transcription initiation factor TFIID subunit 1	gene	protein_coding		31561			1486	2.49532e-12	0.790356	17814	80.4752	5.51266e-11	32	0.0906644	NAM_JL_45	αT, δT, γT, ΣT, αT3, δT3, γT3, ΣT3, ΣTT3	9_95890334	0.91	921039	889478
δT3	5_135934048	5	135934048	Zm00001d015976	135877976	135880055	+		Probable lactoylglutathione lyase chloroplastic	gene	protein_coding		56072			53993	2.51479e-12	1			6.96818e-11	33	0.0934977	NAM_JL_26	δT, γT, ΣT, δT3, γT3, ΣT3, ΣTT3			0
δT3	9_95766888	9	95766888	Zm00001d046554	95762282	95767578	-		Copine-1%253B Copine-1 isoform 1%253B Copine-1 isoform 2	gene	protein_coding		4606			within	2.7628e-11	0.116997	3263	14.7407	8.87546e-11	34	0.0963309	NAM_JL_45	αT, δT, γT, ΣT, αT3, δT3, γT3, ΣT3, ΣTT3	9_95890334	0.91	123446	122756
δT3	9_95230645	9	95230645	Zm00001d046545	95156721	95195559	-			gene	protein_coding		73924			35086	6.73486e-12	0.703142	16013	72.3392	1.2822e-10	35	0.0991642	NAM_JL_45	αT, δT, γT, ΣT, αT3, δT3, γT3, ΣT3, ΣTT3	9_95890334	0.91	659689	694775
δT3	5_135546013	5	135546013	Zm00001d015973	135539837	135544859	+			gene	protein_coding		6176			1154	1.99238e-11	0.287935	7222	32.6256	1.54228e-10	36	0.101997	NAM_JL_26	δT, γT, ΣT, δT3, γT3, ΣT3, ΣTT3			0
δT3	9_97430648	9	97430648	Zm00001d046587	97428880	97438298	-		transducin family protein / WD-40 repeat family protein	gene	protein_coding		1768			within	6.54658e-10	0.0115807	428	1.9335	2.01706e-10	37	0.104831	NAM_JL_45	αT, δT, γT, ΣT, αT3, δT3, γT3, ΣT3, ΣTT3	9_95890334	0.91	1540314	1538546
δT3	5_88007638	5	88007638	Zm00001d015393	88008824	88012844	-		10A19I.15	gene	protein_coding		-1186			1186	4.10119e-11	0.595685	13809	62.3825	6.21387e-10	38	0.107664	NAM_JL_26	δT, γT, ΣT, δT3, γT3, ΣT3, ΣTT3			0
δT3	5_134137311	5	134137311	Zm00001d001646	134113703	134114017	+			ncRNA_gene	lincRNA		23608			23294	2.73036e-11	1			6.91436e-10	39	0.110497	NAM_JL_26	δT, γT, ΣT, δT3, γT3, ΣT3, ΣTT3			0
δT3	9_96083411	9	96083411	Zm00001d046564	96085990	96091648	+	bZIP-transcription factor 93	Putative bZIP transcription factor superfamily protein [Source:UniProtKB/TrEMBL%3BAcc:B7ZYA0]	gene	protein_coding		-2579			2579	6.58225e-11	0.498588	11738	53.0267	8.25053e-10	40	0.113331	NAM_JL_45	αT, δT, γT, ΣT, αT3, δT3, γT3, ΣT3, ΣTT3	9_95890334	0.91	193077	195656
δT3	9_97454721	9	97454721	Zm00001d046590	97452571	97463456	-		Protein S-acyltransferase 24	gene	protein_coding		2150			within	6.54658e-10	0.0556766	1700	7.6798	9.12509e-10	41	0.116164	NAM_JL_45	αT, δT, γT, ΣT, αT3, δT3, γT3, ΣT3, ΣTT3	9_95890334	0.91	1564387	1562237
δT3	9_95762025	9	95762025	Zm00001d046553	95755367	95762132	+		Fructose-bisphosphate aldolase 7 cytosolic	gene	protein_coding		6658			within	2.05403e-10	0.179022	4750	21.4583	9.20258e-10	42	0.118997	NAM_JL_45	αT, δT, γT, ΣT, αT3, δT3, γT3, ΣT3, ΣTT3	9_95890334	0.91	128309	128202
δT3	9_95057149	9	95057149	Zm00001d046543	95052868	95052940	+			ncRNA_gene	tRNA		4281			4209	3.88139e-11	1			9.6927e-10	43	0.12183	NAM_JL_45	αT, δT, γT, ΣT, αT3, δT3, γT3, ΣT3, ΣTT3	9_95890334	0.91	833185	837394
δT3	9_92071476	9	92071476	Zm00001d046488	92065625	92071211	-		Leucine-rich repeat protein kinase family protein	gene	protein_coding		5851			265	5.16374e-10	0.104188	2940	13.2815	1.32594e-09	44	0.124664	NAM_JL_45	αT, δT, γT, ΣT, αT3, δT3, γT3, ΣT3, ΣTT3	9_95890334	0.91	3818858	3819123
δT3	9_97280859	9	97280859	Zm00001d027142	97239863	97240233	+			ncRNA_gene	lincRNA		40996			40626	6.15052e-11	1			1.50761e-09	45	0.127497	NAM_JL_45	αT, δT, γT, ΣT, αT3, δT3, γT3, ΣT3, ΣTT3	9_95890334	0.91	1390525	1349529
δT3	9_96226187	9	96226187	Zm00001d046568	96269799	96278036	+	knotted related homeobox2	knotted related homeobox2	gene	protein_coding		-43612			43612	1.39637e-10	0.527961	12364	55.8547	1.79373e-09	46	0.13033	NAM_JL_45	αT, δT, γT, ΣT, αT3, δT3, γT3, ΣT3, ΣTT3	9_95890334	0.91	335853	379465
δT3	5_133510983	5	133510983	Zm00001d015947	133563180	133564350	-			gene	protein_coding		-52197			52197	9.93664e-11	1			2.38799e-09	47	0.133163	NAM_JL_26	δT, γT, ΣT, δT3, γT3, ΣT3, ΣTT3			0
δT3	5_133766566	5	133766566	Zm00001d015952	133821714	133825615	+		E3 ubiquitin-protein ligase SINAT4	gene	protein_coding		-55148			55148	3.89833e-10	0.277872	7002	31.6317	2.5939e-09	48	0.135997	NAM_JL_26	δT, γT, ΣT, δT3, γT3, ΣT3, ΣTT3			0
δT3	9_92153253	9	92153253	Zm00001d046489	92154833	92157937	-			gene	protein_coding		-1580			1580	1.98873e-09	0.0638149	1907	8.61493	3.01889e-09	49	0.13883	NAM_JL_45	αT, δT, γT, ΣT, αT3, δT3, γT3, ΣT3, ΣTT3	9_95890334	0.91	3737081	3732397
δT3	9_96538941	9	96538941	Zm00001d046574	96556993	96557319	-			gene	protein_coding		-18052			18052	6.82882e-10	0.195688	5138	23.2111	3.17187e-09	50	0.141663	NAM_JL_45	αT, δT, γT, ΣT, αT3, δT3, γT3, ΣT3, ΣTT3	9_95890334	0.91	648607	666659
δT3	5_133578417	5	133578417	Zm00001d015948	133565009	133578292	-		ATP-dependent Clp protease ATP-binding subunit clpX	gene	protein_coding		13408			125	3.51817e-09	0.03849	1223	5.52494	3.21239e-09	51	0.144496	NAM_JL_26	δT, γT, ΣT, δT3, γT3, ΣT3, ΣTT3			0
δT3	5_133446294	5	133446294	Zm00001d015945	133441549	133442802	+		Topless-related protein 2	gene	protein_coding		4745			3492	1.74211e-10	0.971064	21529	97.2579	3.97552e-09	52	0.14733	NAM_JL_26	δT, γT, ΣT, δT3, γT3, ΣT3, ΣTT3			0
δT3	5_133676539	5	133676539	Zm00001d015951	133630615	133632211	+		Serine/threonine-protein kinase Nek1	gene	protein_coding		45924			44328	2.25849e-10	1			5.24222e-09	53	0.150163	NAM_JL_26	δT, γT, ΣT, δT3, γT3, ΣT3, ΣTT3			0
δT3	5_138988242	5	138988242	Zm00001d016007	139009979	139011432	+			gene	protein_coding		-21737			21737	2.30493e-10	1			5.34531e-09	54	0.152996	NAM_JL_26	δT, γT, ΣT, δT3, γT3, ΣT3, ΣTT3			0
δT3	9_95476438	9	95476438	Zm00001d027141	95504913	95505404	-			ncRNA_gene	lincRNA		-28475			28475	2.41709e-10	1			5.59394e-09	55	0.155829	NAM_JL_45	αT, δT, γT, ΣT, αT3, δT3, γT3, ΣT3, ΣTT3	9_95890334	0.91	413896	384930
δT3	5_134899906	5	134899906	Zm00001d015969	134894335	134899512	+		IQ-domain 21	gene	protein_coding		5571			394	2.95817e-10	1			6.78641e-09	56	0.158663	NAM_JL_26	δT, γT, ΣT, δT3, γT3, ΣT3, ΣTT3			0
δT3	9_94890890	9	94890890	Zm00001d046542	94885059	94885415	+			gene	protein_coding		5831			5475	3.03664e-10	1			6.9585e-09	57	0.161496	NAM_JL_45	αT, δT, γT, ΣT, αT3, δT3, γT3, ΣT3, ΣTT3	9_95890334	0.91	999444	1004919
δT3	5_139187777	5	139187777	Zm00001d016009	139188964	139191075	+		L-type lectin-domain containing receptor kinase V.9	gene	protein_coding		-1187			1187	3.61761e-10	1			8.22647e-09	58	0.164329	NAM_JL_26	δT, γT, ΣT, δT3, γT3, ΣT3, ΣTT3			0
δT3	5_139149085	5	139149085	Zm00001d016008	139147655	139156020	+		VHS and GAT domain protein	gene	protein_coding		1430			within	1.70761e-09	0.234696	6000	27.1052	9.07244e-09	59	0.167162	NAM_JL_26	δT, γT, ΣT, δT3, γT3, ΣT3, ΣTT3			0
δT3	9_95930517	9	95930517	Zm00001d046559	95956438	95960560	-			gene	protein_coding		-25921			25921	5.01878e-10	1			1.12484e-08	60	0.169996	NAM_JL_45	αT, δT, γT, ΣT, αT3, δT3, γT3, ΣT3, ΣTT3	9_95890334	0.91	40183	66104
δT3	9_97430648	9	97430648	Zm00001d046588	97435933	97436004	-			ncRNA_gene	tRNA		-5285			5285	6.54658e-10	1			1.44987e-08	61	0.172829	NAM_JL_45	αT, δT, γT, ΣT, αT3, δT3, γT3, ΣT3, ΣTT3	9_95890334	0.91	1540314	1545599
δT3	5_133596954	5	133596954	Zm00001d015949	133613890	133616064	+			gene	protein_coding		-16936			16936	7.00585e-10	1			1.54683e-08	62	0.175662	NAM_JL_26	δT, γT, ΣT, δT3, γT3, ΣT3, ΣTT3			0
δT3	9_96012482	9	96012482	Zm00001d046563	96016421	96018174	+			gene	protein_coding		-3939			3939	9.84695e-10	1			2.1406e-08	63	0.178496	NAM_JL_45	αT, δT, γT, ΣT, αT3, δT3, γT3, ΣT3, ΣTT3	9_95890334	0.91	122148	126087
δT3	8_177987674	8	177987674	Zm00001d012652	177983385	177988780	+		Signal recognition particle 54 kDa protein 3	gene	protein_coding		4289			within	3.34738e-06	0.000372344	27	0.121973	2.68009e-08	64	0.181329	NAM_JL_43	αT3, δT3, γT3	8_179125673	0.27	1137999	1136893
δT3	5_133026028	5	133026028	Zm00001d015943	132990124	132991039	+			gene	protein_coding		35904			34989	1.34525e-09	1			2.88243e-08	65	0.184162	NAM_JL_26	δT, γT, ΣT, δT3, γT3, ΣT3, ΣTT3			0
δT3	5_134032914	5	134032914	Zm00001d015955	133998288	134004395	+		Topoisomerase II-associated protein PAT1	gene	protein_coding		34626			28519	2.88307e-09	0.500007	11765	53.1487	3.0788e-08	66	0.186995	NAM_JL_26	δT, γT, ΣT, δT3, γT3, ΣT3, ΣTT3			0
δT3	5_136136672	5	136136672	Zm00001d015978	136230053	136230125	+			ncRNA_gene	tRNA		-93381			93381	1.4681e-09	1			3.13283e-08	67	0.189829	NAM_JL_26	δT, γT, ΣT, δT3, γT3, ΣT3, ΣTT3			0
δT3	9_98463861	9	98463861	Zm00001d046603	98458436	98460079	-		Putative cytochrome P450 superfamily protein	gene	protein_coding		5425			3782	1.5453e-09	1			3.28963e-08	68	0.192662	NAM_JL_45	αT, δT, γT, ΣT, αT3, δT3, γT3, ΣT3, ΣTT3	9_95890334	0.91	2573527	2568102
δT3	9_94385305	9	94385305	Zm00001d046533	94356499	94362871	+		nucleoporin-related	gene	protein_coding		28806			22434	1.06127e-08	0.162627	4354	19.6693	3.65504e-08	69	0.195495	NAM_JL_45	αT, δT, γT, ΣT, αT3, δT3, γT3, ΣT3, ΣTT3	9_95890334	0.91	1505029	1527463
δT3	9_97774316	9	97774316	Zm00001d046595	97773604	97780433	+		Putative sucrose-phosphate synthase family protein	gene	protein_coding		712			within	4.272e-09	0.433647	10305	46.5531	3.91011e-08	70	0.198328	NAM_JL_45	αT, δT, γT, ΣT, αT3, δT3, γT3, ΣT3, ΣTT3	9_95890334	0.91	1883982	1883270
δT3	5_141106913	5	141106913	Zm00001d016041	141197279	141201287	-		Reticulon-like protein B4	gene	protein_coding		-90366			90366	1.28431e-07	0.0159129	580	2.62017	4.29352e-08	71	0.201162	NAM_JL_26	δT, γT, ΣT, δT3, γT3, ΣT3, ΣTT3			0
δT3	5_134174061	5	134174061	Zm00001d015956	134163807	134172264	+		NAD(P)-binding Rossmann-fold superfamily protein	gene	protein_coding		10254			1797	1.69116e-08	0.141415	3840	17.3473	4.9867e-08	72	0.203995	NAM_JL_26	δT, γT, ΣT, δT3, γT3, ΣT3, ΣTT3			0
δT3	5_140858156	5	140858156	Zm00001d016037	140889217	140917197	-		Adenine nucleotide alpha hydrolases-like superfamily protein	gene	protein_coding		-31061			31061	1.08157e-07	0.0247941	829	3.74503	5.56093e-08	73	0.206828	NAM_JL_26	δT, γT, ΣT, δT3, γT3, ΣT3, ΣTT3			0
δT3	9_96177716	9	96177716	Zm00001d046566	96094106	96097864	-		Nuclear pore complex protein NUP96	gene	protein_coding		83610			79852	2.92192e-09	1			6.03407e-08	74	0.209661	NAM_JL_45	αT, δT, γT, ΣT, αT3, δT3, γT3, ΣT3, ΣTT3	9_95890334	0.91	287382	203772
δT3	9_94716481	9	94716481	Zm00001d046538	94662146	94667640	-		Sec14p-like phosphatidylinositol transfer family protein	gene	protein_coding		54335			48841	1.99525e-07	0.0170427	603	2.72407	6.97067e-08	75	0.212495	NAM_JL_45	αT, δT, γT, ΣT, αT3, δT3, γT3, ΣT3, ΣTT3	9_95890334	0.91	1173853	1222694
δT3	9_97922225	9	97922225	Zm00001d046597	97931274	97932234	-			gene	protein_coding		-9049			9049	3.42457e-09	1			7.01773e-08	76	0.215328	NAM_JL_45	αT, δT, γT, ΣT, αT3, δT3, γT3, ΣT3, ΣTT3	9_95890334	0.91	2031891	2040940
δT3	9_98844722	9	98844722	Zm00001d046613	98839260	98845509	+		Elongator complex protein 4	gene	protein_coding		5462			within	6.79092e-06	0.000538435	33	0.149078	7.46899e-08	77	0.218161	NAM_JL_45	αT, δT, γT, ΣT, αT3, δT3, γT3, ΣT3, ΣTT3	9_95890334	0.91	2954388	2948926
δT3	9_95973059	9	95973059	Zm00001d046562	95972136	95972208	+			ncRNA_gene	tRNA		923			851	3.70422e-09	1			7.56171e-08	78	0.220994	NAM_JL_45	αT, δT, γT, ΣT, αT3, δT3, γT3, ΣT3, ΣTT3	9_95890334	0.91	82725	81802
δT3	5_133070601	5	133070601	Zm00001d015944	133071580	133074353	-			gene	protein_coding		-979			979	3.71629e-09	1			7.58514e-08	79	0.223828	NAM_JL_26	δT, γT, ΣT, δT3, γT3, ΣT3, ΣTT3			0
δT3	5_80303613	5	80303613	Zm00001d015234	80281071	80289642	-		Cycloartenol synthase	gene	protein_coding		22542			13971	0.00509485	7.84251e-07	1	0.00451753	8.12636e-08	80	0.226661					0
δT3	9_98780634	9	98780634	Zm00001d046611	98772481	98777453	+		Serine/threonine-protein kinase RUNKEL	gene	protein_coding		8153			3181	4.25921e-09	1			8.6352e-08	81	0.229494	NAM_JL_45	αT, δT, γT, ΣT, αT3, δT3, γT3, ΣT3, ΣTT3	9_95890334	0.91	2890300	2882147
δT3	5_86081045	5	86081045	Zm00001d015355	86080662	86081459	+		Urease accessory protein F	gene	protein_coding		383			within	9.1387e-09	0.700345	15957	72.0862	1.27153e-07	82	0.232328	NAM_JL_26	δT, γT, ΣT, δT3, γT3, ΣT3, ΣTT3			0
δT3	5_139367817	5	139367817	Zm00001d016012	139326610	139330546	-		Imidazole glycerol phosphate synthase hisHF chloroplastic	gene	protein_coding		41207			37271	6.85718e-09	1			1.35758e-07	83	0.235161	NAM_JL_26	δT, γT, ΣT, δT3, γT3, ΣT3, ΣTT3			0
δT3	9_97231474	9	97231474	Zm00001d046583	97236468	97238511	-		40S ribosomal protein S14	gene	protein_coding		-4994			4994	7.23298e-08	0.114982	3209	14.4967	1.63048e-07	84	0.237994	NAM_JL_45	αT, δT, γT, ΣT, αT3, δT3, γT3, ΣT3, ΣTT3	9_95890334	0.91	1341140	1346134
δT3	5_144238093	5	144238093	Zm00001d016091	144132627	144133823	+		UDP-glycosyltransferase 73D1	gene	protein_coding		105466			104270	6.65207e-08	0.126899	3509	15.852	1.65368e-07	85	0.240827	NAM_JL_26	δT, γT, ΣT, δT3, γT3, ΣT3, ΣTT3			0
δT3	9_78882364	9	78882364	Zm00001d046298	78902785	78903875	+		Nuclear pore complex protein GP210	gene	protein_coding		-20421			20421	1.04068e-08	1			2.01692e-07	86	0.243661	NAM_JL_45	αT, δT, γT, ΣT, αT3, δT3, γT3, ΣT3, ΣTT3	9_95890334	0.91	17007970	16986459
δT3	9_97345699	9	97345699	Zm00001d046585	97342384	97342803	+			gene	protein_coding		3315			2896	1.08059e-08	1			2.09021e-07	87	0.246494	NAM_JL_45	αT, δT, γT, ΣT, αT3, δT3, γT3, ΣT3, ΣTT3	9_95890334	0.91	1455365	1452050
δT3	5_210387192	5	210387192	Zm00001d017937	210385310	210401948	-		S-adenosylmethionine carrier 1 chloroplastic/mitochondrial	gene	protein_coding		1882			within	1.35632e-06	0.00878783	339	1.53144	2.29384e-07	88	0.249327	NAM_JL_29	δT, δT3, ΣTT3	5_210241256	0.68	145936	144054
δT3	5_132622348	5	132622348	Zm00001d015932	132599003	132614556	+		Chromatin modification-related protein EAF3	gene	protein_coding		23345			7792	2.70963e-07	0.0493302	1507	6.80791	2.55711e-07	89	0.25216	NAM_JL_26	δT, γT, ΣT, δT3, γT3, ΣT3, ΣTT3			0
δT3	2_237092503	2	237092503	Zm00001d007661	237091675	237098914	-		Glutathione synthetase chloroplastic	gene	protein_coding		828			within	0.000151254	0.000100531	9	0.0406578	2.88934e-07	90	0.254994					0
δT3	5_140742781	5	140742781	Zm00001d016035	140762380	140763279	-		Expansin-A13	gene	protein_coding		-19599			19599	1.66043e-08	1			3.14046e-07	91	0.257827	NAM_JL_26	δT, γT, ΣT, δT3, γT3, ΣT3, ΣTT3			0
δT3	9_96925124	9	96925124	Zm00001d046581	96875104	96896745	-		Isoleucine--tRNA ligase cytoplasmic	gene	protein_coding		50020			28379	1.21673e-07	0.136666	3722	16.8142	3.14481e-07	92	0.26066	NAM_JL_45	αT, δT, γT, ΣT, αT3, δT3, γT3, ΣT3, ΣTT3	9_95890334	0.91	1034790	984770
δT3	9_25234505	9	25234505	Zm00001d045516	25240624	25249861	+		Probable transcriptional regulator SLK2	gene	protein_coding		-6119			6119	2.69052e-05	0.000752052	39	0.176184	3.787e-07	93	0.263493					0
δT3	5_141250405	5	141250405	Zm00001d016043	141223539	141223609	-			ncRNA_gene	tRNA		26866			26796	2.02518e-08	1			3.79013e-07	94	0.266327	NAM_JL_26	δT, γT, ΣT, δT3, γT3, ΣT3, ΣTT3			0
δT3	5_141315856	5	141315856	Zm00001d016044	141277238	141286453	-			gene	protein_coding		38618			29403	2.87248e-08	0.76382	17277	78.0493	4.08861e-07	95	0.26916	NAM_JL_26	δT, γT, ΣT, δT3, γT3, ΣT3, ΣTT3			0
δT3	9_79082798	9	79082798	Zm00001d046299	79124493	79126324	+	HSF-transcription factor 28	HSF28 HSF type transcription factor	gene	protein_coding		-41695			41695	6.42306e-07	0.0400462	1278	5.7734	4.75236e-07	96	0.271993	NAM_JL_45	αT, δT, γT, ΣT, αT3, δT3, γT3, ΣT3, ΣTT3	9_95890334	0.91	16807536	16764010
δT3	5_69576671	5	69576671	Zm00001d014950	69573089	69578098	+		Peptidase C78 ubiquitin fold modifier-specific peptidase 1/ 2	gene	protein_coding		3582			within	1.75542e-05	0.00157195	67	0.302674	5.07893e-07	97	0.274826	NAM_JL_25	αT3, ΣT3			0
δT3	5_141673016	5	141673016	Zm00001d016052	141693514	141695426	-	WRKY-transcription factor 2	WRKY transcription factor 22	gene	protein_coding		-20498			20498	3.91793e-08	0.843002	18890	85.3361	6.01969e-07	98	0.27766	NAM_JL_26	δT, γT, ΣT, δT3, γT3, ΣT3, ΣTT3			0
δT3	5_140955044	5	140955044	Zm00001d016039	140926675	140928938	+			gene	protein_coding		28369			26106	3.61015e-08	1			6.54771e-07	99	0.280493	NAM_JL_26	δT, γT, ΣT, δT3, γT3, ΣT3, ΣTT3			0
δT3	5_61159728	5	61159728	Zm00001d014742	61158657	61162310	+		F-box protein SKIP31	gene	protein_coding		1071			within	4.25109e-08	0.940744	20881	94.3305	7.21238e-07	100	0.283326	NAM_JL_25	αT3, ΣT3			0
δT3	9_78415949	9	78415949	Zm00001d046289	78457352	78458110	-		Putative SWIM zinc finger family protein	gene	protein_coding		-41403			41403	1.43307e-06	0.0284736	937	4.23292	7.35072e-07	101	0.28616	NAM_JL_45	αT, δT, γT, ΣT, αT3, δT3, γT3, ΣT3, ΣTT3	9_95890334	0.91	17474385	17432224
δT3	9_94829820	9	94829820	Zm00001d046540	94826683	94831760	+		C2 and GRAM domain-containing protein	gene	protein_coding		3137			within	4.37203e-08	1			7.84581e-07	102	0.288993	NAM_JL_45	αT, δT, γT, ΣT, αT3, δT3, γT3, ΣT3, ΣTT3	9_95890334	0.91	1060514	1058574
δT3	5_134483199	5	134483199	Zm00001d015963	134455335	134457795	+		Protein DETOXIFICATION 16	gene	protein_coding		27864			25404	4.67951e-07	0.0942011	2705	12.2199	7.90699e-07	103	0.291826	NAM_JL_26	δT, γT, ΣT, δT3, γT3, ΣT3, ΣTT3			0
δT3	5_88053391	5	88053391	Zm00001d001594	88035959	88036351	+			ncRNA_gene	lincRNA		17432			17040	4.66175e-08	1			8.3358e-07	104	0.294659	NAM_JL_26	δT, γT, ΣT, δT3, γT3, ΣT3, ΣTT3			0
δT3	9_94218715	9	94218715	Zm00001d046531	94211896	94217211	-		Protein WVD2-like 5	gene	protein_coding		6819			1504	1.7916e-07	0.266388	6740	30.4481	8.52281e-07	105	0.297493	NAM_JL_45	αT, δT, γT, ΣT, αT3, δT3, γT3, ΣT3, ΣTT3	9_95890334	0.91	1671619	1673123
δT3	9_78830959	9	78830959	Zm00001d046297	78828543	78829768	+		Protodermal factor 1	gene	protein_coding		2416			1191	2.43671e-06	0.0200617	683	3.08547	8.71799e-07	106	0.300326	NAM_JL_45	αT, δT, γT, ΣT, αT3, δT3, γT3, ΣT3, ΣTT3	9_95890334	0.91	17059375	17060566
δT3	9_76950013	9	76950013	Zm00001d046254	76891003	76909916	+		Anther-specific proline-rich protein APG	gene	protein_coding		59010			40097	2.978e-05	0.00166303	77	0.34785	8.82573e-07	107	0.303159	NAM_JL_45	αT, δT, γT, ΣT, αT3, δT3, γT3, ΣT3, ΣTT3	9_95890334	0.91	18940321	18980418
δT3	9_77342349	9	77342349	Zm00001d046267	77352323	77357618	+			gene	protein_coding		-9974			9974	5.11005e-08	1			9.0905e-07	108	0.305992	NAM_JL_45	αT, δT, γT, ΣT, αT3, δT3, γT3, ΣT3, ΣTT3	9_95890334	0.91	18547985	18532716
δT3	9_98847244	9	98847244	Zm00001d046616	98847757	98851557	-		Protein kinase superfamily protein	gene	protein_coding		-513			513	1.40703e-07	0.36929	8948	40.4228	9.23479e-07	109	0.308826	NAM_JL_45	αT, δT, γT, ΣT, αT3, δT3, γT3, ΣT3, ΣTT3	9_95890334	0.91	2956910	2957423
δT3	5_209225123	5	209225123	Zm00001d017871	209242050	209250119	+		Protein S-acyltransferase 18	gene	protein_coding		-16927			16927	0.000114221	0.00046848	30	0.135526	9.49456e-07	110	0.311659	NAM_JL_29	δT, δT3, ΣTT3	5_210241256	0.68	1016133	991137
δT3	9_98965891	9	98965891	Zm00001d046619	99018251	99018321	+			ncRNA_gene	tRNA		-52360			52360	5.54418e-08	1			9.8176e-07	111	0.314492	NAM_JL_45	αT, δT, γT, ΣT, αT3, δT3, γT3, ΣT3, ΣTT3	9_95890334	0.91	3075557	3127917
δT3	9_72671655	9	72671655	Zm00001d046218	72602369	72613367	+			gene	protein_coding		69286			58288	2.92426e-06	0.0192827	665	3.00416	9.97557e-07	112	0.317325	NAM_JL_45	αT, δT, γT, ΣT, αT3, δT3, γT3, ΣT3, ΣTT3	9_95890334	0.91	23218679	23276967
δT3	9_94750720	9	94750720	Zm00001d046539	94817071	94823847	+		26S protease regulatory subunit S10B homolog B	gene	protein_coding		-66351			66351	5.93019e-08	0.963393	21361	96.4989	1.00996e-06	113	0.320159	NAM_JL_45	αT, δT, γT, ΣT, αT3, δT3, γT3, ΣT3, ΣTT3	9_95890334	0.91	1139614	1066487
δT3	5_134586063	5	134586063	Zm00001d015964	134537160	134539561	+		Protein DETOXIFICATION 16	gene	protein_coding		48903			46502	1.70647e-07	0.376262	9099	41.105	1.12757e-06	114	0.322992	NAM_JL_26	δT, γT, ΣT, δT3, γT3, ΣT3, ΣTT3			0
δT3	5_88095918	5	88095918	Zm00001d015394	88146164	88150303	+	PLATZ-transcription factor 8	PLATZ transcription factor family protein	gene	protein_coding		-50246			50246	7.25763e-08	0.893904	19951	90.1292	1.13863e-06	115	0.325825	NAM_JL_26	δT, γT, ΣT, δT3, γT3, ΣT3, ΣTT3			0
δT3	5_210377176	5	210377176	Zm00001d017935	210378851	210382756	+		zinc ion binding	gene	protein_coding		-1675			1675	0.000139722	0.000476055	31	0.140043	1.16574e-06	116	0.328658	NAM_JL_29	δT, δT3, ΣTT3	5_210241256	0.68	135920	137595
δT3	1_24845480	1	24845480	Zm00001d028162	24771608	24778825	-	sulfate permease1	sulfate permease1	gene	protein_coding		73872			66655	0.00492218	1.38886e-05	3	0.0135526	1.19623e-06	117	0.331492					0
δT3	5_141522507	5	141522507	Zm00001d016049	141512843	141520070	+		Vacuolar protein sorting-associated protein 29	gene	protein_coding		9664			2437	5.41587e-07	0.134115	3666	16.5613	1.2666e-06	118	0.334325	NAM_JL_26	δT, γT, ΣT, δT3, γT3, ΣT3, ΣTT3			0
δT3	5_134246745	5	134246745	Zm00001d015960	134287992	134290874	-		SGNH hydrolase-type esterase superfamily protein	gene	protein_coding		-41247			41247	2.0218e-07	0.359266	8757	39.56	1.26662e-06	119	0.337158	NAM_JL_26	δT, γT, ΣT, δT3, γT3, ΣT3, ΣTT3			0
δT3	9_95653731	9	95653731	Zm00001d046552	95727707	95731224	+		Charged multivesicular body protein 4b%253B Putative SNF domain containing family protein	gene	protein_coding		-73976			73976	4.00211e-07	0.206518	5374	24.2772	1.43057e-06	120	0.339992	NAM_JL_45	αT, δT, γT, ΣT, αT3, δT3, γT3, ΣT3, ΣTT3	9_95890334	0.91	236603	159110
δT3	9_99534041	9	99534041	Zm00001d046625	99488946	99492927	+		Calcium-binding protein	gene	protein_coding		45095			41114	1.25242e-06	0.0684791	2042	9.22479	1.4813e-06	121	0.342825	NAM_JL_45	αT, δT, γT, ΣT, αT3, δT3, γT3, ΣT3, ΣTT3	9_95890334	0.91	3643707	3598612
δT3	9_96325868	9	96325868	Zm00001d046569	96322136	96327889	-		Protein kinase superfamily protein with octicosapeptide/Phox/Bem1p domain	gene	protein_coding		3732			within	5.18188e-07	0.172154	4563	20.6135	1.53726e-06	122	0.345658	NAM_JL_45	αT, δT, γT, ΣT, αT3, δT3, γT3, ΣT3, ΣTT3	9_95890334	0.91	435534	431802
δT3	7_22886492	7	22886492	Zm00001d019228	22845582	22847553	-		ZIP zinc/iron transport family protein	gene	protein_coding		40910			38939	1.38615e-06	0.0672499	2013	9.09378	1.60227e-06	123	0.348491	NAM_JL_36	δT, αT3, δT3	7_34277444	0.59	11390952	11429891
δT3	9_96764413	9	96764413	Zm00001d046576	96775849	96776370	-		Protein argonaute 13	gene	protein_coding		-11436			11436	1.0255e-07	1			1.75287e-06	124	0.351325	NAM_JL_45	αT, δT, γT, ΣT, αT3, δT3, γT3, ΣT3, ΣTT3	9_95890334	0.91	874079	885515
δT3	5_140858156	5	140858156	Zm00001d001652	140888570	140889235	-			ncRNA_gene	lincRNA		-30414			30414	1.08157e-07	1			1.84297e-06	125	0.354158	NAM_JL_26	δT, γT, ΣT, δT3, γT3, ΣT3, ΣTT3			0
δT3	5_140814429	5	140814429	Zm00001d016036	140763837	140779741	-		Chloroplast processing peptidase	gene	protein_coding		50592			34688	2.84957e-07	0.409109	9761	44.0956	1.97772e-06	126	0.356991	NAM_JL_26	δT, γT, ΣT, δT3, γT3, ΣT3, ΣTT3			0
δT3	9_99145848	9	99145848	Zm00001d046621	99138564	99141663	+	glossy15	Floral homeotic protein APETALA 2	gene	protein_coding		7284			4185	1.20345e-07	1			2.03779e-06	127	0.359824	NAM_JL_45	αT, δT, γT, ΣT, αT3, δT3, γT3, ΣT3, ΣTT3	9_95890334	0.91	3255514	3248230
δT3	5_132642914	5	132642914	Zm00001d015934	132637131	132639444	-		Pectinesterase-2	gene	protein_coding		5783			3470	6.21033e-07	0.200328	5242	23.6809	2.1025e-06	128	0.362658	NAM_JL_26	δT, γT, ΣT, δT3, γT3, ΣT3, ΣTT3			0
δT3	5_1899028	5	1899028	Zm00001d012913	1891852	1900865	-		Chaperone DnaJ-domain superfamily protein	gene	protein_coding		7176			within	5.12251e-05	0.0025937	114	0.514998	2.2366e-06	129	0.365491	NAM_JL_23	δT3, ΣTT3	5_1505511	0.17	393517	386341
δT3	9_34517046	9	34517046	Zm00001d045706	34496670	34509714	+	restorer of fertility2	Restorer of fertility2	gene	protein_coding		20376			7332	1.92447e-06	0.0699357	2067	9.33773	2.26393e-06	130	0.368324	NAM_JL_45	αT, δT, γT, ΣT, αT3, δT3, γT3, ΣT3, ΣTT3	9_95890334	0.91	61373288	61380620
δT3	5_61118157	5	61118157	Zm00001d014737	61117986	61119432	+		Arogenate dehydrogenase 1 chloroplastic	gene	protein_coding	Yes	171			within	1.48679e-07	0.913785	20345	91.9091	2.28404e-06	131	0.371157	NAM_JL_25	αT3, ΣT3			0
δT3	5_134373507	5	134373507	Zm00001d015961	134439009	134443657	-		Mediator of RNA polymerase II transcription subunit 33A	gene	protein_coding		-65502			65502	4.71508e-07	0.308837	7657	34.5907	2.43799e-06	132	0.373991	NAM_JL_26	δT, γT, ΣT, δT3, γT3, ΣT3, ΣTT3			0
δT3	5_69614086	5	69614086	Zm00001d014951	69611597	69615673	+		TMPIT-like protein	gene	protein_coding		2489			within	4.57805e-05	0.00332683	148	0.668594	2.54308e-06	133	0.376824	NAM_JL_25	αT3, ΣT3			0
δT3	9_81721951	9	81721951	Zm00001d046342	81729257	81733312	-	kaurene oxidase2	kaurene oxidase2	gene	protein_coding		-7306			7306	2.9175e-06	0.0523994	1597	7.21449	2.55205e-06	134	0.379657	NAM_JL_45	αT, δT, γT, ΣT, αT3, δT3, γT3, ΣT3, ΣTT3	9_95890334	0.91	14168383	14157022
δT3	9_97673722	9	97673722	Zm00001d046592	97669727	97674265	-		ER membrane protein complex subunit 7 homolog	gene	protein_coding		3995			within	7.72274e-07	0.210101	5448	24.6115	2.69897e-06	135	0.38249	NAM_JL_45	αT, δT, γT, ΣT, αT3, δT3, γT3, ΣT3, ΣTT3	9_95890334	0.91	1783388	1779393
δT3	5_139802248	5	139802248	Zm00001d016017	139852314	139856285	+		Protein disulfide isomerase-like 1-2	gene	protein_coding		-50066			50066	1.67441e-07	1			2.77997e-06	136	0.385324	NAM_JL_26	δT, γT, ΣT, δT3, γT3, ΣT3, ΣTT3			0
δT3	5_20372563	5	20372563	Zm00001d013795	20369757	20373797	+		Peroxisomal membrane 22 kDa (Mpv17/PMP22) family protein	gene	protein_coding		2806			within	4.79977e-07	0.355945	8676	39.1941	2.83305e-06	137	0.388157	NAM_JL_24	αT, δT, γT, ΣT, δT3, γT3, ΣTT3			0
δT3	9_29394010	9	29394010	Zm00001d045631	29285315	29290140	+		Acyl-CoA N-acyltransferase with RING/FYVE/PHD-type zinc finger domain	gene	protein_coding		108695			103870	2.76578e-05	0.00673796	275	1.24232	3.07407e-06	138	0.39099	NAM_JL_45	αT, δT, γT, ΣT, αT3, δT3, γT3, ΣT3, ΣTT3	9_95890334	0.91	66496324	66600194
δT3	9_93868450	9	93868450	Zm00001d027140	93916559	93917433	-			ncRNA_gene	lincRNA		-48109			48109	2.07228e-07	1			3.39635e-06	139	0.393823	NAM_JL_45	αT, δT, γT, ΣT, αT3, δT3, γT3, ΣT3, ΣTT3	9_95890334	0.91	2021884	1972901
δT3	9_25269001	9	25269001	Zm00001d045520	25265649	25267237	-		Succinate dehydrogenase subunit 8A mitochondrila	gene	protein_coding		3352			1764	8.84656e-07	0.238576	6099	27.5524	3.45526e-06	140	0.396657					0
δT3	5_83041767	5	83041767	Zm00001d015293	82992330	82999777	-		VIN3-like protein 2	gene	protein_coding		49437			41990	3.47976e-07	0.616376	14252	64.3838	3.50789e-06	141	0.39949					0
δT3	9_97679224	9	97679224	Zm00001d046593	97674582	97680959	+	acid phosphatase1	acid phosphatase1	gene	protein_coding		4642			within	3.00241e-07	0.718321	16331	73.7757	3.52609e-06	142	0.402323	NAM_JL_45	αT, δT, γT, ΣT, αT3, δT3, γT3, ΣT3, ΣTT3	9_95890334	0.91	1788890	1784248
δT3	5_82826322	5	82826322	Zm00001d015289	82829898	82835405	+		RING/U-box superfamily protein	gene	protein_coding		-3576			3576	2.61982e-06	0.0844303	2447	11.0544	3.6108e-06	143	0.405157					0
δT3	9_77151363	9	77151363	Zm00001d046261	77150413	77154118	+		Putative thaumatin domain family protein	gene	protein_coding		950			within	6.19084e-07	0.413714	9874	44.6061	4.14347e-06	144	0.40799	NAM_JL_45	αT, δT, γT, ΣT, αT3, δT3, γT3, ΣT3, ΣTT3	9_95890334	0.91	18738971	18736216
δT3	9_32101052	9	32101052	Zm00001d045663	32136528	32137595	+		Helicase-like transcription factor CHR27	gene	protein_coding		-35476			35476	2.60867e-07	1			4.21542e-06	145	0.410823	NAM_JL_45	αT, δT, γT, ΣT, αT3, δT3, γT3, ΣT3, ΣTT3	9_95890334	0.91	63789282	63752739
δT3	2_191438403	2	191438403	Zm00001d005874	191436169	191438639	-			gene	protein_coding		2234			within	0.000943611	0.000313083	21	0.0948681	4.73716e-06	146	0.413656	NAM_JL_11	γT, ΣT, ΣTT3			0
δT3	9_77256996	9	77256996	Zm00001d046263	77253429	77264289	-		Amino acid permease 6	gene	protein_coding		3567			within	6.30378e-07	0.473008	11174	50.4789	4.77841e-06	147	0.41649	NAM_JL_45	αT, δT, γT, ΣT, αT3, δT3, γT3, ΣT3, ΣTT3	9_95890334	0.91	18633338	18626045
δT3	5_142151091	5	142151091	Zm00001d016060	142152957	142154867	+		B-cell receptor-associated protein 31-like containing protein	gene	protein_coding		-1866			1866	2.70582e-06	0.116651	3255	14.7046	5.0403e-06	148	0.419323	NAM_JL_26	δT, γT, ΣT, δT3, γT3, ΣT3, ΣTT3			0
δT3	5_134192818	5	134192818	Zm00001d015959	134191551	134191623	-			ncRNA_gene	tRNA		1267			1195	3.17677e-07	1			5.07084e-06	149	0.422156	NAM_JL_26	δT, γT, ΣT, δT3, γT3, ΣT3, ΣTT3			0
δT3	5_92105959	5	92105959	Zm00001d015473	92107583	92115114	+		Protein transport protein SEC61 gamma subunit	gene	protein_coding		-1624			1624	0.000135917	0.00239093	104	0.469823	5.17986e-06	150	0.424989	NAM_JL_26	δT, γT, ΣT, δT3, γT3, ΣT3, ΣTT3			0
δT3	2_199416390	2	199416390	Zm00001d006131	199416217	199426495	-		BAG-associated GRAM protein 1	gene	protein_coding		173			within	0.000813115	0.000423185	28	0.126491	5.46508e-06	151	0.427823	NAM_JL_11	γT, ΣT, ΣTT3			0
δT3	5_84628600	5	84628600	Zm00001d015327	84630842	84634232	-	ubiquitin1	ubiquitin1	gene	protein_coding		-2242			2242	0.00040968	0.000875856	46	0.207806	5.68388e-06	152	0.430656	NAM_JL_26	δT, γT, ΣT, δT3, γT3, ΣT3, ΣTT3			0
δT3	3_565474	3	565474	Zm00001d039252	563497	566145	+		cAMP-regulated phosphoprotein 19-related protein	gene	protein_coding		1977			within	4.92071e-06	0.0796699	2319	10.4761	6.17526e-06	153	0.433489					0
δT3	5_210262121	5	210262121	Zm00001d017930	210256398	210262442	+	organelle RRM protein1	organelle RRM protein1	gene	protein_coding		5723			within	2.89349e-05	0.0137203	506	2.28587	6.24846e-06	154	0.436322	NAM_JL_29	δT, δT3, ΣTT3	5_210241256	0.68	20865	15142
δT3	9_25548283	9	25548283	Zm00001d045527	25545809	25547272	+		transferases%3Bfolic acid binding	gene	protein_coding		2474			1011	1.24343e-06	0.321658	7925	35.8014	6.29214e-06	155	0.439156					0
δT3	5_141420311	5	141420311	Zm00001d016045	141438801	141445420	+		Isoamylase 1 chloroplastic	gene	protein_coding		-18490			18490	4.23302e-07	1			6.63534e-06	156	0.441989	NAM_JL_26	δT, γT, ΣT, δT3, γT3, ΣT3, ΣTT3			0
δT3	9_88170937	9	88170937	Zm00001d046416	88220986	88223951	+		Putative cytochrome P450 superfamily protein	gene	protein_coding		-50049			50049	4.42304e-07	1			6.91377e-06	157	0.444822	NAM_JL_45	αT, δT, γT, ΣT, αT3, δT3, γT3, ΣT3, ΣTT3	9_95890334	0.91	7719397	7666383
δT3	5_132484800	5	132484800	Zm00001d015930	132527912	132538160	+			gene	protein_coding		-43112			43112	5.18916e-07	1			8.02841e-06	158	0.447655	NAM_JL_26	δT, γT, ΣT, δT3, γT3, ΣT3, ΣTT3			0
δT3	6_96378072	6	96378072	Zm00001d036651	96421952	96426369	-		F10K1.23	gene	protein_coding		-43880			43880	2.18972e-06	0.240476	6136	27.7196	8.13919e-06	159	0.450489					0
δT3	5_134189177	5	134189177	Zm00001d015957	134188430	134189353	+		Acyl-CoA-binding domain-containing protein 3	gene	protein_coding		747			within	5.4474e-07	1			8.40151e-06	160	0.453322	NAM_JL_26	δT, γT, ΣT, δT3, γT3, ΣT3, ΣTT3			0
δT3	2_208856743	2	208856743	Zm00001d006458	208855966	208856205	+			gene	protein_coding		777			538	0.0234167	2.37228e-05	4	0.0180701	8.55673e-06	161	0.456155					0
δT3	6_95673319	6	95673319	Zm00001d036631	95649670	95655779	-		Probable CDP-diacylglycerol--inositol 3-phosphatidyltransferase 2	gene	protein_coding		23649			17540	7.12867e-05	0.0082526	325	1.4682	9.02808e-06	162	0.458989					0
δT3	5_139739577	5	139739577	Zm00001d016016	139737481	139737957	+		Dynein light chain LC6%252C flagellar outer arm	gene	protein_coding		2096			1620	2.87285e-06	0.215531	5571	25.1671	9.4704e-06	163	0.461822	NAM_JL_26	δT, γT, ΣT, δT3, γT3, ΣT3, ΣTT3			0
δT3	9_87567503	9	87567503	Zm00001d046404	87563336	87563743	-			gene	protein_coding		4167			3760	0.00010117	0.00620309	256	1.15649	9.59009e-06	164	0.464655	NAM_JL_45	αT, δT, γT, ΣT, αT3, δT3, γT3, ΣT3, ΣTT3	9_95890334	0.91	8322831	8326591
δT3	8_30076895	8	30076895	Zm00001d009010	30106964	30108529	-		Plasma membrane-associated cation-binding protein 1	gene	protein_coding		-30069			30069	0.00384931	0.00016687	15	0.0677629	9.80085e-06	165	0.467488					0
δT3	1_60996384	1	60996384	Zm00001d029174	60996905	60999925	-		homolog of nucleolar protein NOP56	gene	protein_coding		-521			521	0.000104257	0.00661618	270	1.21973	1.04756e-05	166	0.470322					0
δT3	1_286390087	1	286390087	Zm00001d034198	286411877	286413004	+		Protein PHLOEM PROTEIN 2-LIKE A10	gene	protein_coding		-21790			21790	0.000624093	0.00110845	54	0.243947	1.05039e-05	167	0.473155					0
δT3	9_82240208	9	82240208	Zm00001d046346	82254067	82256584	+	bHLH-transcription factor 98	Putative HLH DNA-binding domain superfamily protein	gene	protein_coding		-13859			13859	6.95809e-07	1			1.05611e-05	168	0.475988	NAM_JL_45	αT, δT, γT, ΣT, αT3, δT3, γT3, ΣT3, ΣTT3	9_95890334	0.91	13650126	13633750
δT3	9_25261027	9	25261027	Zm00001d045519	25257676	25261436	+		Oligopeptide transporter 7	gene	protein_coding		3351			within	8.73928e-07	0.803804	18068	81.6227	1.06555e-05	169	0.478821					0
δT3	9_81939610	9	81939610	Zm00001d046344	81994757	82001394	-	kaurene oxidase1	kaurene oxidase1	gene	protein_coding		-55147			55147	3.3994e-06	0.208435	5416	24.4669	1.07417e-05	170	0.481655	NAM_JL_45	αT, δT, γT, ΣT, αT3, δT3, γT3, ΣT3, ΣTT3	9_95890334	0.91	13950724	13888940
δT3	2_237364658	2	237364658	Zm00001d007682	237363251	237365690	-		2-oxoglutarate (2OG) and Fe(II)-dependent oxygenase superfamily protein	gene	protein_coding		1407			within	3.92727e-06	0.180877	4791	21.6435	1.07672e-05	171	0.484488					0
δT3	5_1362771	5	1362771	Zm00001d012866	1358353	1362950	+		translocation protein-related	gene	protein_coding		4418			within	0.00023003	0.00318184	141	0.636971	1.10722e-05	172	0.487321	NAM_JL_23	δT3, ΣTT3	5_1505511	0.17	142740	142561
δT3	1_20270252	1	20270252	Zm00001d028010	20263677	20268913	-		conserved oligomeric Golgi complex component-related / COG complex component-related	gene	protein_coding		6575			1339	0.00670798	0.000109537	11	0.0496928	1.11125e-05	173	0.490154	NAM_JL_2	γT, δT3	1_16288571	0.08	3981681	3975106
δT3	7_167569489	7	167569489	Zm00001d021988	167558259	167560016	-	bHLH-transcription factor 15	Transcription factor bHLH85	gene	protein_coding		11230			9473	7.34775e-07	1			1.11125e-05	174	0.492988					0
δT3	9_25303684	9	25303684	Zm00001d045521	25318479	25319292	-			gene	protein_coding		-14795			14795	7.65849e-07	1			1.15507e-05	175	0.495821					0
δT3	10_134464237	10	134464237	Zm00001d025946	134457486	134477101	+		Serine/threonine-protein kinase GRIK1	gene	protein_coding		6751			within	0.000130162	0.00621392	257	1.161	1.21547e-05	176	0.498654					0
ΣT	5_25434949	5	25434949	Zm00001d013937	25431430	25434346	-	GRMZM2G073351	Protochlorophyllide reductase C chloroplastic	gene	protein_coding	Yes	3519	ΣT_3		603	1.409e-21	2.0817e-08	1	0.00451753	1.95635e-27	1	0.00281452	NAM_JL_24	αT, δT, γT, ΣT, δT3, γT3, ΣTT3	5_25433577	0.9	1372	within
ΣT	1_231124446	1	231124446	Zm00001d032576	231120510	231123615	-	GRMZM2G036455	Protochlorophyllide reductase C chloroplastic	gene	protein_coding	Yes	3936	ΣT_2		831	5.58239e-14	4.93538e-08	2	0.00903506	1.33185e-19	2	0.00562905	NAM_JL_5	αT, δT, γT, ΣT, δT3, γT3, ΣTT3	1_231304479	0.54	180033	180864
ΣT	5_25518275	5	25518275	Zm00001d013940	25518163	25523534	+		Nucleolar complex protein 2 homolog	gene	protein_coding		112	ΣT_3		within	6.57027e-19	0.388674	8889	40.1563	1.11881e-17	3	0.00844357	NAM_JL_24	αT, δT, γT, ΣT, δT3, γT3, ΣTT3	5_25433577	0.9	84698	84586
ΣT	5_25179181	5	25179181	Zm00001d013933	25177803	25179923	-		CBS domain-containing protein CBSX5	gene	protein_coding		1378	ΣT_3		within	1.36216e-13	6.88465e-06	5	0.0225876	3.98667e-17	4	0.0112581	NAM_JL_24	αT, δT, γT, ΣT, δT3, γT3, ΣTT3	5_25433577	0.9	254396	253654
ΣT	1_230674409	1	230674409	Zm00001d032566	230666267	230672973	-			gene	protein_coding		8142	ΣT_2		1436	4.80962e-11	4.30947e-06	4	0.0180701	7.69228e-15	5	0.0140726	NAM_JL_5	αT, δT, γT, ΣT, δT3, γT3, ΣTT3	1_231304479	0.54	630070	631506
ΣT	5_25545001	5	25545001	Zm00001d013944	25544795	25545626	+			gene	protein_coding		206	ΣT_3		within	1.64722e-15	1			5.77179e-14	6	0.0168871	NAM_JL_24	αT, δT, γT, ΣT, δT3, γT3, ΣTT3	5_25433577	0.9	111424	111218
ΣT	1_231045647	1	231045647	Zm00001d032575	231049610	231065263	-		WAPL (Wings apart-like protein regulation of heterochromatin) protein	gene	protein_coding		-3963	ΣT_2		3963	5.90253e-14	0.0337683	833	3.7631	6.94605e-14	7	0.0197017	NAM_JL_5	αT, δT, γT, ΣT, δT3, γT3, ΣTT3	1_231304479	0.54	258832	239216
ΣT	1_231458031	1	231458031	Zm00001d032591	231449534	231455154	+		Endosomal targeting BRO1-like domain-containing protein	gene	protein_coding		8497	ΣT_2		2877	1.23927e-13	0.0444873	1099	4.96476	1.8652e-13	8	0.0225162	NAM_JL_5	αT, δT, γT, ΣT, δT3, γT3, ΣTT3	1_231304479	0.54	153552	145055
ΣT	1_230958704	1	230958704	Zm00001d032572	230960883	230963337	-		LanC-like protein 2	gene	protein_coding		-2179	ΣT_2		2179	1.28392e-13	0.0834535	2010	9.08023	3.55379e-13	9	0.0253307	NAM_JL_5	αT, δT, γT, ΣT, δT3, γT3, ΣTT3	1_231304479	0.54	345775	341142
ΣT	5_25541201	5	25541201	Zm00001d013943	25539709	25540838	-		FIP1	gene	protein_coding		1492	ΣT_3		363	3.73352e-14	0.434487	9933	44.8726	5.31298e-13	10	0.0281452	NAM_JL_24	αT, δT, γT, ΣT, δT3, γT3, ΣTT3	5_25433577	0.9	107624	106132
ΣT	5_25230714	5	25230714	Zm00001d013935	25228457	25241728	-		WAPL (Wings apart-like protein regulation of heterochromatin) protein	gene	protein_coding		2257	ΣT_3		within	7.36001e-14	0.245785	5666	25.5963	5.90512e-13	11	0.0309598	NAM_JL_24	αT, δT, γT, ΣT, δT3, γT3, ΣTT3	5_25433577	0.9	202863	191849
ΣT	5_25534731	5	25534731	Zm00001d013941	25536275	25537969	+		Pentatricopeptide repeat-containing protein chloroplastic	gene	protein_coding		-1544	ΣT_3		1544	4.51761e-14	1			1.43336e-12	12	0.0337743	NAM_JL_24	αT, δT, γT, ΣT, δT3, γT3, ΣTT3	5_25433577	0.9	101154	102698
ΣT	1_230570504	1	230570504	Zm00001d032562	230560853	230563661	-		evolutionarily conserved C-terminal region 2	gene	protein_coding		9651	ΣT_2		6843	1.6263e-13	0.514596	11679	52.7602	2.60371e-12	13	0.0365888	NAM_JL_5	αT, δT, γT, ΣT, δT3, γT3, ΣTT3	1_231304479	0.54	733975	740818
ΣT	5_25188756	5	25188756	Zm00001d013934	25185480	25187200	-		soluble epoxide hydrolase	gene	protein_coding		3276	ΣT_3		1556	3.04387e-13	0.438159	10021	45.2701	4.0872e-12	14	0.0394033	NAM_JL_24	αT, δT, γT, ΣT, δT3, γT3, ΣTT3	5_25433577	0.9	244821	246377
ΣT	1_231364495	1	231364495	Zm00001d032587	231348416	231372317	+		DNA-directed RNA polymerase I subunit 2	gene	protein_coding		16079	ΣT_2		within	4.24547e-13	0.380143	8672	39.176	4.91507e-12	15	0.0422178	NAM_JL_5	αT, δT, γT, ΣT, δT3, γT3, ΣTT3	1_231304479	0.54	60016	43937
ΣT	1_231258767	1	231258767	Zm00001d032582	231197140	231210494	-			gene	protein_coding		61627	ΣT_2		48273	3.19425e-13	0.682335	15256	68.9194	6.57231e-12	16	0.0450324	NAM_JL_5	αT, δT, γT, ΣT, δT3, γT3, ΣTT3	1_231304479	0.54	45712	93985
ΣT	1_231406358	1	231406358	Zm00001d032588	231396624	231401913	-		Succinate dehydrogenase subunit 3-2 mitochondrial	gene	protein_coding		9734	ΣT_2		4445	4.3087e-13	0.544553	12333	55.7147	7.0579e-12	17	0.0478469	NAM_JL_5	αT, δT, γT, ΣT, δT3, γT3, ΣTT3	1_231304479	0.54	101879	92145
ΣT	1_231258767	1	231258767	Zm00001d032584	231200272	231203229	+		Actin-11	gene	protein_coding		58495	ΣT_2		55538	3.19425e-13	1			9.50999e-12	18	0.0506614	NAM_JL_5	αT, δT, γT, ΣT, δT3, γT3, ΣTT3	1_231304479	0.54	45712	101250
ΣT	1_231258767	1	231258767	Zm00001d032583	231199003	231199076	+			ncRNA_gene	tRNA		59764	ΣT_2		59691	3.19425e-13	1			9.50999e-12	19	0.0534759	NAM_JL_5	αT, δT, γT, ΣT, δT3, γT3, ΣTT3	1_231304479	0.54	45712	105403
ΣT	1_231647326	1	231647326	Zm00001d032600	231640138	231644331	-		RING/U-box superfamily protein	gene	protein_coding		7188	ΣT_2		2995	6.43302e-12	0.0513528	1281	5.78695	9.82426e-12	20	0.0562905	NAM_JL_5	αT, δT, γT, ΣT, δT3, γT3, ΣTT3	1_231304479	0.54	342847	335659
ΣT	1_231439051	1	231439051	Zm00001d032590	231427968	231433366	+			gene	protein_coding		11083	ΣT_2		5685	4.3087e-13	1			1.2699e-11	21	0.059105	NAM_JL_5	αT, δT, γT, ΣT, δT3, γT3, ΣTT3	1_231304479	0.54	134572	123489
ΣT	1_231174813	1	231174813	Zm00001d032579	231178877	231179514	-			gene	protein_coding		-4064	ΣT_2		4064	4.43102e-13	1			1.30471e-11	22	0.0619195	NAM_JL_5	αT, δT, γT, ΣT, δT3, γT3, ΣTT3	1_231304479	0.54	129666	124965
ΣT	1_231517855	1	231517855	Zm00001d032592	231532863	231532935	+			ncRNA_gene	tRNA		-15008	ΣT_2		15008	5.65015e-13	1			1.64995e-11	23	0.064734	NAM_JL_5	αT, δT, γT, ΣT, δT3, γT3, ΣTT3	1_231304479	0.54	213376	228384
ΣT	1_230539545	1	230539545	Zm00001d022933	230537327	230537769	+			ncRNA_gene	lincRNA		2218	ΣT_2		1776	5.93643e-13	1			1.73062e-11	24	0.0675486	NAM_JL_5	αT, δT, γT, ΣT, δT3, γT3, ΣTT3	1_231304479	0.54	764934	766710
ΣT	1_230539545	1	230539545	Zm00001d022934	230537327	230539727	+			ncRNA_gene	lincRNA		2218	ΣT_2		within	5.93643e-13	1			1.73062e-11	25	0.0703631	NAM_JL_5	αT, δT, γT, ΣT, δT3, γT3, ΣTT3	1_231304479	0.54	764934	764752
ΣT	1_230853549	1	230853549	Zm00001d032570	230853577	230855383	-		soluble epoxide hydrolase	gene	protein_coding		-28	ΣT_2		28	2.08228e-11	0.028518	720	3.25262	1.73113e-11	26	0.0731776	NAM_JL_5	αT, δT, γT, ΣT, δT3, γT3, ΣTT3	1_231304479	0.54	450930	449096
ΣT	1_230862687	1	230862687	Zm00001d032571	230863189	230864361	-		LisH/CRA/RING-U-box domains-containing protein	gene	protein_coding		-502	ΣT_2		502	1.57945e-12	0.450278	10280	46.4402	2.06045e-11	27	0.0759921	NAM_JL_5	αT, δT, γT, ΣT, δT3, γT3, ΣTT3	1_231304479	0.54	441792	440118
ΣT	1_231425128	1	231425128	Zm00001d032589	231420001	231423056	+		hAT transposon superfamily protein	gene	protein_coding		5127	ΣT_2		2072	7.65679e-13	1			2.21266e-11	28	0.0788066	NAM_JL_5	αT, δT, γT, ΣT, δT3, γT3, ΣTT3	1_231304479	0.54	120649	115522
ΣT	1_231548763	1	231548763	Zm00001d032597	231553045	231559488	-		Nucleic acid binding protein	gene	protein_coding		-4282	ΣT_2		4282	8.39293e-13	0.947191	21024	94.9765	2.29432e-11	29	0.0816212	NAM_JL_5	αT, δT, γT, ΣT, δT3, γT3, ΣTT3	1_231304479	0.54	244284	248566
ΣT	5_25547183	5	25547183	Zm00001d013945	25546118	25546714	-		Ripening-related protein 3	gene	protein_coding		1065	ΣT_3		469	1.04978e-12	1			3.00052e-11	30	0.0844357	NAM_JL_24	αT, δT, γT, ΣT, δT3, γT3, ΣTT3	5_25433577	0.9	113606	112541
ΣT	1_231611868	1	231611868	Zm00001d022936	231609214	231610002	+			ncRNA_gene	lincRNA		2654	ΣT_2		1866	1.0508e-12	1			3.00335e-11	31	0.0872502	NAM_JL_5	αT, δT, γT, ΣT, δT3, γT3, ΣTT3	1_231304479	0.54	307389	304735
ΣT	5_25313346	5	25313346	Zm00001d013936	25242212	25245116	+			gene	protein_coding		71134	ΣT_3		68230	1.29088e-12	1			3.66297e-11	32	0.0900647	NAM_JL_24	αT, δT, γT, ΣT, δT3, γT3, ΣTT3	5_25433577	0.9	120231	188461
ΣT	1_230816005	1	230816005	Zm00001d032569	230852598	230853237	-		Ras-related protein RABA6a	gene	protein_coding		-36593	ΣT_2		36593	1.96221e-12	1			5.48573e-11	33	0.0928793	NAM_JL_5	αT, δT, γT, ΣT, δT3, γT3, ΣTT3	1_231304479	0.54	488474	451242
ΣT	1_230792043	1	230792043	Zm00001d032568	230778341	230778667	-		HR-like lesion-inducing protein-related	gene	protein_coding		13702	ΣT_2		13376	1.97808e-12	1			5.5285e-11	34	0.0956938	NAM_JL_5	αT, δT, γT, ΣT, δT3, γT3, ΣTT3	1_231304479	0.54	512436	525812
ΣT	5_25009608	5	25009608	Zm00001d013927	25004008	25010095	-		Monothiol glutaredoxin-S17	gene	protein_coding		5600	ΣT_3		within	1.25221e-10	0.0583195	1444	6.52331	1.94568e-10	35	0.0985083	NAM_JL_24	αT, δT, γT, ΣT, δT3, γT3, ΣTT3	5_25433577	0.9	423969	423482
ΣT	5_24943799	5	24943799	Zm00001d013923	24943241	24945641	+		Pentatricopeptide repeat-containing protein mitochondrial	gene	protein_coding		558	ΣT_3		within	5.02994e-11	0.258024	5929	26.7844	3.38319e-10	36	0.101323	NAM_JL_24	αT, δT, γT, ΣT, δT3, γT3, ΣTT3	5_25433577	0.9	489778	487936
ΣT	1_230537061	1	230537061	Zm00001d022932	230536285	230537257	+			ncRNA_gene	lincRNA		776	ΣT_2		within	1.97219e-11	1			5.05854e-10	37	0.104137	NAM_JL_5	αT, δT, γT, ΣT, δT3, γT3, ΣTT3	1_231304479	0.54	767418	767222
ΣT	1_230726037	1	230726037	Zm00001d032567	230714286	230732552	-		Mediator of RNA polymerase II transcription subunit 16	gene	protein_coding		11751	ΣT_2		within	6.99441e-11	0.381114	8692	39.2664	6.75693e-10	38	0.106952	NAM_JL_5	αT, δT, γT, ΣT, δT3, γT3, ΣTT3	1_231304479	0.54	578442	571927
ΣT	5_26160680	5	26160680	Zm00001d013957	26165521	26170988	-		Ser/Thr protein phosphatase family	gene	protein_coding		-4841	ΣT_3		4841	3.31125e-11	0.811733	18143	81.9615	6.81094e-10	39	0.109766	NAM_JL_24	αT, δT, γT, ΣT, δT3, γT3, ΣTT3	5_25433577	0.9	727103	731944
ΣT	1_231673544	1	231673544	Zm00001d032601	231674392	231677680	-		ABC transporter G family member 11	gene	protein_coding		-848	ΣT_2		848	7.63811e-11	0.352029	8035	36.2983	6.81334e-10	40	0.112581	NAM_JL_5	αT, δT, γT, ΣT, δT3, γT3, ΣTT3	1_231304479	0.54	369065	369913
ΣT	1_230532500	1	230532500	Zm00001d032560	230529377	230531598	-		CBS domain-containing protein CBSX5	gene	protein_coding		3123	ΣT_2		902	1.03272e-09	0.0460385	1142	5.15902	1.17766e-09	41	0.115395	NAM_JL_5	αT, δT, γT, ΣT, δT3, γT3, ΣTT3	1_231304479	0.54	771979	772881
ΣT	5_25623162	5	25623162	Zm00001d013947	25632561	25633358	-		NHL25	gene	protein_coding		-9399	ΣT_3		9399	5.27545e-11	1			1.30121e-09	42	0.11821	NAM_JL_24	αT, δT, γT, ΣT, δT3, γT3, ΣTT3	5_25433577	0.9	189585	198984
ΣT	1_230627110	1	230627110	Zm00001d032564	230626458	230626757	+			gene	protein_coding		652	ΣT_2		353	8.05568e-11	1			1.95286e-09	43	0.121024	NAM_JL_5	αT, δT, γT, ΣT, δT3, γT3, ΣTT3	1_231304479	0.54	677369	677722
ΣT	5_26134678	5	26134678	Zm00001d013956	26132024	26133292	+	tonoplast intrinsic protein3	tonoplast intrinsic protein3	gene	protein_coding		2654	ΣT_3		1386	7.31043e-10	0.127971	3020	13.6429	2.25391e-09	44	0.123839	NAM_JL_24	αT, δT, γT, ΣT, δT3, γT3, ΣTT3	5_25433577	0.9	701101	698447
ΣT	1_231149146	1	231149146	Zm00001d032578	231149171	231150619	+	C2C2-Dof-transcription factor 13	Dof zinc finger protein DOF1.6	gene	protein_coding		-25	ΣT_2		25	1.69765e-08	0.00736733	216	0.975786	2.97697e-09	45	0.126654	NAM_JL_5	αT, δT, γT, ΣT, δT3, γT3, ΣTT3	1_231304479	0.54	155333	153860
ΣT	5_24958760	5	24958760	Zm00001d013924	24948366	24954210	-		Phosphoinositide phosphatase SAC2	gene	protein_coding		10394	ΣT_3		4550	3.97138e-10	1			8.99388e-09	46	0.129468	NAM_JL_24	αT, δT, γT, ΣT, δT3, γT3, ΣTT3	5_25433577	0.9	474817	479367
ΣT	1_230528837	1	230528837	Zm00001d032559	230528661	230528733	-			ncRNA_gene	tRNA		176	ΣT_2		104	4.53976e-10	1			1.02204e-08	47	0.132283	NAM_JL_5	αT, δT, γT, ΣT, δT3, γT3, ΣTT3	1_231304479	0.54	775642	775746
ΣT	1_230661277	1	230661277	Zm00001d032565	230664256	230666245	+		Microtubule-associated protein RP/EB family member 1C	gene	protein_coding		-2979	ΣT_2		2979	2.19232e-09	0.276355	6381	28.8263	1.34648e-08	48	0.135097	NAM_JL_5	αT, δT, γT, ΣT, δT3, γT3, ΣTT3	1_231304479	0.54	643202	638234
ΣT	1_230614433	1	230614433	Zm00001d032563	230613798	230614382	-			gene	protein_coding		635	ΣT_2		51	1.41283e-09	0.475237	10790	48.7441	1.48531e-08	49	0.137912	NAM_JL_5	αT, δT, γT, ΣT, δT3, γT3, ΣTT3	1_231304479	0.54	690046	690097
ΣT	1_230983282	1	230983282	Zm00001d032573	230979145	230982119	-		Probable prolyl 4-hydroxylase 3	gene	protein_coding		4137	ΣT_2		1163	2.08256e-09	0.387318	8853	39.9937	1.76956e-08	50	0.140726	NAM_JL_5	αT, δT, γT, ΣT, δT3, γT3, ΣTT3	1_231304479	0.54	321197	322360
ΣT	5_25847881	5	25847881	Zm00001d013949	25847189	25847818	-		Ripening-related protein 3	gene	protein_coding		692	ΣT_3		63	8.98848e-10	1			1.96218e-08	51	0.143541	NAM_JL_24	αT, δT, γT, ΣT, δT3, γT3, ΣTT3	5_25433577	0.9	414304	413612
ΣT	1_230532500	1	230532500	Zm00001d032561	230530692	230531598	-			gene	protein_coding		1808	ΣT_2		902	1.03272e-09	1			2.24008e-08	52	0.146355	NAM_JL_5	αT, δT, γT, ΣT, δT3, γT3, ΣTT3	1_231304479	0.54	771979	772881
ΣT	5_24850845	5	24850845	Zm00001d013920	24847545	24853940	-		Phosphatidylinositol 4-phosphate 5-kinase 9	gene	protein_coding		3300	ΣT_3		within	4.16524e-09	0.265018	6092	27.5208	2.38704e-08	53	0.14917	NAM_JL_24	αT, δT, γT, ΣT, δT3, γT3, ΣTT3	5_25433577	0.9	582732	579637
ΣT	1_230439046	1	230439046	Zm00001d032556	230440139	230441090	+	GNAT-transcription factor 4	Acetyltransferase	gene	protein_coding		-1093	ΣT_2		1093	1.00069e-07	0.0366626	907	4.0974	7.49291e-08	54	0.151984	NAM_JL_5	αT, δT, γT, ΣT, δT3, γT3, ΣTT3	1_231304479	0.54	865433	863389
ΣT	1_230442868	1	230442868	Zm00001d032557	230443208	230447035	-		RING/U-box superfamily protein	gene	protein_coding		-340	ΣT_2		340	6.25962e-09	0.749585	16746	75.6505	9.46747e-08	55	0.154799	NAM_JL_5	αT, δT, γT, ΣT, δT3, γT3, ΣTT3	1_231304479	0.54	861611	857444
ΣT	1_230403361	1	230403361	Zm00001d032555	230382672	230388742	-		Expressed protein%3B protein	gene	protein_coding		20689	ΣT_2		14619	5.31756e-08	0.0899472	2149	9.70817	9.64167e-08	56	0.157613	NAM_JL_5	αT, δT, γT, ΣT, δT3, γT3, ΣTT3	1_231304479	0.54	901118	915737
ΣT	5_26094323	5	26094323	Zm00001d013954	26095480	26098512	+		Tetratricopeptide repeat (TPR)-like superfamily protein	gene	protein_coding		-1157	ΣT_3		1157	2.51265e-08	0.26544	6107	27.5885	1.32229e-07	57	0.160428	NAM_JL_24	αT, δT, γT, ΣT, δT3, γT3, ΣTT3	5_25433577	0.9	660746	661903
ΣT	1_230475083	1	230475083	Zm00001d032558	230456520	230456810	+			gene	protein_coding		18563	ΣT_2		18273	6.93199e-09	1			1.37164e-07	58	0.163242	NAM_JL_5	αT, δT, γT, ΣT, δT3, γT3, ΣTT3	1_231304479	0.54	829396	847669
ΣT	5_24984992	5	24984992	Zm00001d013926	24983948	24987816	+		Formin-like protein 6	gene	protein_coding		1044	ΣT_3		within	1.85597e-08	0.549723	12446	56.2252	1.97939e-07	59	0.166057	NAM_JL_24	αT, δT, γT, ΣT, δT3, γT3, ΣTT3	5_25433577	0.9	448585	445761
ΣT	5_24822074	5	24822074	Zm00001d013918	24815087	24817536	+		Thylakoid lumenal 17.4 kDa protein chloroplastic	gene	protein_coding		6987	ΣT_3		4538	1.4644e-08	0.826579	18455	83.371	2.32764e-07	60	0.168871	NAM_JL_24	αT, δT, γT, ΣT, δT3, γT3, ΣTT3	5_25433577	0.9	611503	616041
ΣT	5_26529475	5	26529475	Zm00001d013966	26539982	26542353	+		Succinate dehydrogenase subunit 3	gene	protein_coding		-10507	ΣT_3		10507	5.61419e-07	0.0252112	636	2.87315	2.69964e-07	61	0.171686	NAM_JL_24	αT, δT, γT, ΣT, δT3, γT3, ΣTT3	5_25433577	0.9	1095898	1106405
ΣT	5_24822074	5	24822074	Zm00001d013919	24817151	24819264	-		Tetratricopeptide repeat (TPR)-like superfamily protein	gene	protein_coding		4923	ΣT_3		2810	1.4644e-08	1			2.78811e-07	62	0.1745	NAM_JL_24	αT, δT, γT, ΣT, δT3, γT3, ΣTT3	5_25433577	0.9	611503	614313
ΣT	5_25112000	5	25112000	Zm00001d013931	25111416	25112574	+	MYB-transcription factor 102	Transcription factor MYB36	gene	protein_coding		584	ΣT_3		within	2.01214e-08	1			3.76703e-07	63	0.177315	NAM_JL_24	αT, δT, γT, ΣT, δT3, γT3, ΣTT3	5_25433577	0.9	321577	321003
ΣT	1_230375151	1	230375151	Zm00001d032554	230369805	230381443	-		HIT-type Zinc finger family protein	gene	protein_coding		5346	ΣT_2		within	2.36263e-08	0.943816	20957	94.6738	4.15177e-07	64	0.180129	NAM_JL_5	αT, δT, γT, ΣT, δT3, γT3, ΣTT3	1_231304479	0.54	929328	923036
ΣT	5_26099903	5	26099903	Zm00001d013955	26101030	26108463	+		Plant basic secretory protein (BSP) family protein	gene	protein_coding		-1127	ΣT_3		1127	2.26969e-08	1			4.22185e-07	65	0.182944	NAM_JL_24	αT, δT, γT, ΣT, δT3, γT3, ΣTT3	5_25433577	0.9	666326	667453
ΣT	1_230361893	1	230361893	Zm00001d032553	230368677	230369198	-		Plant UBX domain-containing protein 10	gene	protein_coding		-6784	ΣT_2		6784	2.39928e-08	1			4.44959e-07	66	0.185759	NAM_JL_5	αT, δT, γT, ΣT, δT3, γT3, ΣTT3	1_231304479	0.54	942586	935281
ΣT	5_24685434	5	24685434	Zm00001d013915	24682234	24685218	+		Glutamyl-tRNA reductase 1 chloroplastic	gene	protein_coding	Yes	3200	ΣT_3		216	2.5343e-08	1			4.68611e-07	67	0.188573	NAM_JL_24	αT, δT, γT, ΣT, δT3, γT3, ΣTT3	5_25433577	0.9	748143	748359
ΣT	1_230240354	1	230240354	Zm00001d032552	230238930	230243910	-		Protein NEOXANTHIN-DEFICIENT 1	gene	protein_coding		1424	ΣT_2		within	6.4889e-07	0.043493	1080	4.87893	5.18813e-07	68	0.191388	NAM_JL_5	αT, δT, γT, ΣT, δT3, γT3, ΣTT3	1_231304479	0.54	1064125	1060569
ΣT	5_25964587	5	25964587	Zm00001d013951	26015245	26022791	+		Tetratricopeptide repeat (TPR)-like superfamily protein	gene	protein_coding		-50658	ΣT_3		50658	5.23683e-08	0.650115	14537	65.6713	6.19476e-07	69	0.194202	NAM_JL_24	αT, δT, γT, ΣT, δT3, γT3, ΣTT3	5_25433577	0.9	531010	581668
ΣT	5_26061616	5	26061616	Zm00001d013953	26058379	26059046	-			gene	protein_coding		3237	ΣT_3		2570	4.37357e-08	1			7.84841e-07	70	0.197017	NAM_JL_24	αT, δT, γT, ΣT, δT3, γT3, ΣTT3	5_25433577	0.9	628039	624802
ΣT	5_25913783	5	25913783	Zm00001d013950	25864653	25865518	-		Plant basic secretory protein (BSP) family protein	gene	protein_coding		49130	ΣT_3		48265	4.9436e-08	1			8.81078e-07	71	0.199831	NAM_JL_24	αT, δT, γT, ΣT, δT3, γT3, ΣTT3	5_25433577	0.9	480206	431076
ΣT	5_90075475	5	90075475	Zm00001d015435	90052984	90074741	-		Protein STRUBBELIG-RECEPTOR FAMILY 1	gene	protein_coding		22491			734	8.24047e-06	0.00640422	186	0.84026	9.37118e-07	72	0.202646	NAM_JL_26	δT, γT, ΣT, δT3, γT3, ΣT3, ΣTT3	5_94952859	0.17	4877384	4878118
ΣT	1_230403361	1	230403361	Zm00001d022931	230388365	230388872	+			ncRNA_gene	lincRNA		14996	ΣT_2		14489	5.31756e-08	1			9.4385e-07	73	0.20546	NAM_JL_5	αT, δT, γT, ΣT, δT3, γT3, ΣTT3	1_231304479	0.54	901118	915607
ΣT	1_231871130	1	231871130	Zm00001d032605	231856279	231868220	-		Alpha-galactosidase 2	gene	protein_coding		14851	ΣT_2		2910	1.45335e-07	0.434273	9929	44.8545	1.10946e-06	74	0.208275	NAM_JL_5	αT, δT, γT, ΣT, δT3, γT3, ΣTT3	1_231304479	0.54	566651	551800
ΣT	5_26678876	5	26678876	Zm00001d013968	26695076	26698413	+		Transcription factor TFIIE alpha subunit	gene	protein_coding		-16200	ΣT_3		16200	6.55928e-08	1			1.15048e-06	75	0.211089	NAM_JL_24	αT, δT, γT, ΣT, δT3, γT3, ΣTT3	5_25433577	0.9	1245299	1261499
ΣT	5_24711584	5	24711584	Zm00001d013917	24714057	24714383	+			gene	protein_coding		-2473	ΣT_3		2473	7.38355e-08	1			1.28632e-06	76	0.213904	NAM_JL_24	αT, δT, γT, ΣT, δT3, γT3, ΣTT3	5_25433577	0.9	721993	719194
ΣT	1_220057926	1	220057926	Zm00001d032279	220036840	220043811	-		ABC2 homolog 15	gene	protein_coding		21086	ΣT_1		14115	3.43444e-07	0.258555	5949	26.8748	1.53062e-06	77	0.216718					0
ΣT	5_24456116	5	24456116	Zm00001d013911	24430939	24437600	-		Malic enzyme	gene	protein_coding		25177	ΣT_3		18516	1.00703e-06	0.091773	2195	9.91597	1.58931e-06	78	0.219533	NAM_JL_24	αT, δT, γT, ΣT, δT3, γT3, ΣTT3	5_25433577	0.9	977461	995977
ΣT	1_219234823	1	219234823	Zm00001d032257	219226773	219232499	-		Aminoaldehyde dehydrogenase 1b	gene	protein_coding		8050	ΣT_1		2324	1.17946e-06	0.10625	2544	11.4926	2.11692e-06	79	0.222347					0
ΣT	1_220342628	1	220342628	Zm00001d032283	220368811	220372532	+			gene	protein_coding		-26183	ΣT_1		26183	2.27855e-06	0.0568892	1406	6.35164	2.1853e-06	80	0.225162					0
ΣT	1_255827669	1	255827669	Zm00001d033246	255864303	255869980	+	Homeobox-transcription factor 124	Homeobox-leucine zipper protein ATHB-14	gene	protein_coding		-36634			36634	6.83148e-06	0.020014	533	2.40784	2.2977e-06	81	0.227976					0
ΣT	3_216715191	3	216715191	Zm00001d044017	216717307	216725476	-		Probable plastid-lipid-associated protein 14 chloroplastic	gene	protein_coding		-2116			2116	0.0793777	1.72414e-06	3	0.0135526	2.29981e-06	82	0.230791					0
ΣT	10_144818591	10	144818591	Zm00001d026382	144818522	144822103	-		G-type lectin S-receptor-like serine/threonine-protein kinase B120	gene	protein_coding		69			within	0.00316637	4.71457e-05	7	0.0316227	2.49559e-06	83	0.233605	NAM_JL_52	δT, γT, ΣT, ΣTT3	10_145879135	0.77	1060544	1057032
ΣT	5_26224065	5	26224065	Zm00001d013958	26237325	26241411	-			gene	protein_coding		-13260			13260	7.12769e-06	0.0223545	578	2.61113	2.6533e-06	84	0.23642	NAM_JL_24	αT, δT, γT, ΣT, δT3, γT3, ΣTT3	5_25433577	0.9	790488	803748
ΣT	5_25077611	5	25077611	Zm00001d013929	25099634	25099706	+			ncRNA_gene	tRNA		-22023	ΣT_3		22023	1.69189e-07	1			2.80722e-06	85	0.239234	NAM_JL_24	αT, δT, γT, ΣT, δT3, γT3, ΣTT3	5_25433577	0.9	355966	333871
ΣT	5_26657231	5	26657231	Zm00001d013967	26610074	26621214	-		Myosin-3	gene	protein_coding		47157	ΣT_3		36017	2.66865e-07	0.686406	15353	69.3576	3.02477e-06	86	0.242049	NAM_JL_24	αT, δT, γT, ΣT, δT3, γT3, ΣTT3	5_25433577	0.9	1223654	1176497
ΣT	5_33235307	5	33235307	Zm00001d014124	33239071	33244411	-		Cell division cycle protein 48	gene	protein_coding		-3764	ΣT_3		3764	7.56296e-07	0.335729	7667	34.6359	4.10986e-06	87	0.244863					0
ΣT	5_205920627	5	205920627	Zm00001d017754	205924278	205940214	-		yeast YAK1-related gene 1	gene	protein_coding		-3651			3651	0.000217319	0.0012788	38	0.171666	4.47319e-06	88	0.247678	NAM_JL_28	αT, γT, αT3, γT3			0
ΣT	1_286390382	1	286390382	Zm00001d034198	286411877	286413004	+		Protein PHLOEM PROTEIN 2-LIKE A10	gene	protein_coding		-21495			21495	0.000157105	0.00192262	57	0.257499	4.83668e-06	89	0.250493					0
ΣT	5_24456116	5	24456116	Zm00001d013910	24428231	24432486	+		DEAD-box ATP-dependent RNA helicase 8	gene	protein_coding		27885	ΣT_3		23630	1.00703e-06	0.317603	7285	32.9102	5.10312e-06	90	0.253307	NAM_JL_24	αT, δT, γT, ΣT, δT3, γT3, ΣTT3	5_25433577	0.9	977461	1001091
ΣT	1_279984235	1	279984235	Zm00001d033981	279982395	279986186	-	ATP sulfurylase1	ATP sulfurylase1	gene	protein_coding		1840			within	0.000638047	0.000539046	18	0.0813155	5.46267e-06	91	0.256122					0
ΣT	5_30419814	5	30419814	Zm00001d014043	30420457	30425053	-		PPPDE peptidase domain-containing protein 2	gene	protein_coding		-643			643	3.90682e-06	0.0894198	2135	9.64492	5.54315e-06	92	0.258936	NAM_JL_24	αT, δT, γT, ΣT, δT3, γT3, ΣTT3	5_25433577	0.9	4986237	4986880
ΣT	5_33217546	5	33217546	Zm00001d014123	33202990	33204555	+		peroxidase 13	gene	protein_coding		14556	ΣT_3		12991	3.56832e-07	1			5.65435e-06	93	0.261751					0
ΣT	5_26280501	5	26280501	Zm00001d013959	26293309	26294683	+			gene	protein_coding		-12808	ΣT_3		12808	3.61837e-07	1			5.72864e-06	94	0.264565	NAM_JL_24	αT, δT, γT, ΣT, δT3, γT3, ΣTT3	5_25433577	0.9	846924	859732
ΣT	5_190059571	5	190059571	Zm00001d017241	190060998	190063941	+		Two-component response regulator-like APRR1	gene	protein_coding		-1427			1427	1.64189e-05	0.0221089	573	2.58854	5.74594e-06	95	0.26738					0
ΣT	5_27846252	5	27846252	Zm00001d013996	27841955	27848005	-		Syntaxin-41	gene	protein_coding		4297			within	8.91644e-05	0.00412999	119	0.537586	5.82367e-06	96	0.270194	NAM_JL_24	αT, δT, γT, ΣT, δT3, γT3, ΣTT3	5_25433577	0.9	2412675	2408378
ΣT	6_119271685	6	119271685	Zm00001d037279	119259106	119268023	+		Dynamin-2A	gene	protein_coding		12579			3662	1.94884e-05	0.0282324	708	3.19841	8.48028e-06	97	0.273009	NAM_JL_31	δT, γT, ΣT, αT3, δT3, ΣTT3	6_120781474	0.37	1509789	1513451
ΣT	6_119207521	6	119207521	Zm00001d037278	119172801	119179266	-	phosphofructose kinase1	phosphofructose kinase1	gene	protein_coding		34720			28255	5.70517e-06	0.0971584	2345	10.5936	8.53937e-06	98	0.275823	NAM_JL_31	δT, γT, ΣT, αT3, δT3, ΣTT3	6_120781474	0.37	1573953	1602208
ΣT	2_208166542	2	208166542	Zm00001d006437	208168131	208169072	+		Monothiol glutaredoxin-S17	gene	protein_coding		-1589			1589	0.0120474	4.78227e-05	8	0.0361402	8.85345e-06	99	0.278638					0
ΣT	8_166895063	8	166895063	Zm00001d012034	166861044	166902381	+		N-acetylglucosaminyl transferase component family protein / Gpi1 family protein	gene	protein_coding		34019			within	7.72438e-05	0.00757789	224	1.01193	8.98566e-06	100	0.281452					0
ΣT	6_115497910	6	115497910	Zm00001d037199	115494237	115498366	+		O-fucosyltransferase family protein	gene	protein_coding		3673			within	0.000225578	0.00268034	83	0.374955	9.26202e-06	101	0.284267	NAM_JL_31	δT, γT, ΣT, αT3, δT3, ΣTT3	6_120781474	0.37	5283564	5283108
ΣT	1_230178887	1	230178887	Zm00001d032548	230202990	230203968	+	GNAT-transcription factor 3	Acyl-CoA N-acyltransferases (NAT) superfamily protein	gene	protein_coding		-24103	ΣT_2		24103	6.3922e-07	0.951027	21108	95.356	9.30915e-06	102	0.287081	NAM_JL_5	αT, δT, γT, ΣT, δT3, γT3, ΣTT3	1_231304479	0.54	1125592	1100511
ΣT	1_219284636	1	219284636	Zm00001d032260	219248901	219250308	-		Beta-adaptin-like protein C	gene	protein_coding		35735	ΣT_1		34328	6.31135e-07	1			9.64106e-06	103	0.289896					0
ΣT	5_30307615	5	30307615	Zm00001d014039	30288982	30292232	-		non-intrinsic ABC protein 4	gene	protein_coding		18633			15383	2.14457e-05	0.0297161	741	3.34749	9.72878e-06	104	0.29271	NAM_JL_24	αT, δT, γT, ΣT, δT3, γT3, ΣTT3	5_25433577	0.9	4874038	4855405
ΣT	4_179541835	4	179541835	Zm00001d052101	179536713	179538773	+	chaperonin10	chaperonin10	gene	protein_coding		5122			3062	4.42947e-05	0.0168692	460	2.07806	1.12881e-05	105	0.295525					0
ΣT	5_24686914	5	24686914	Zm00001d013916	24686332	24686404	-			ncRNA_gene	tRNA		582	ΣT_3		510	7.70497e-07	1			1.16162e-05	106	0.298339	NAM_JL_24	αT, δT, γT, ΣT, δT3, γT3, ΣTT3	5_25433577	0.9	746663	747173
ΣT	3_34390385	3	34390385	Zm00001d040260	34385034	34385420	-		MFS18 protein	gene	protein_coding		5351			4965	0.000183747	0.00423491	122	0.551138	1.17239e-05	107	0.301154	NAM_JL_14	αT3, δT3, γT3, ΣT3			0
ΣT	4_226776	4	226776	Zm00001d048584	220589	221098	+		Thioesterase family protein	gene	protein_coding		6187			5678	9.56285e-05	0.00883623	245	1.10679	1.26613e-05	108	0.303968					0
ΣT	9_108881070	9	108881070	Zm00001d046887	108878757	108880778	+		NC domain-containing protein-related	gene	protein_coding		2313			292	9.34325e-07	1			1.3906e-05	109	0.306783					0
ΣT	5_26325477	5	26325477	Zm00001d013960	26332091	26335998	+		ATP-binding cassette sub-family G member 2	gene	protein_coding		-6614	ΣT_3		6614	1.17731e-06	0.838006	18715	84.5455	1.46302e-05	110	0.309598	NAM_JL_24	αT, δT, γT, ΣT, δT3, γT3, ΣTT3	5_25433577	0.9	891900	898514
ΣT	1_230235168	1	230235168	Zm00001d032551	230234648	230234720	+			ncRNA_gene	tRNA		520	ΣT_2		448	1.00843e-06	1			1.49319e-05	111	0.312412	NAM_JL_5	αT, δT, γT, ΣT, δT3, γT3, ΣTT3	1_231304479	0.54	1069311	1069759
ΣT	5_168180793	5	168180793	Zm00001d016581	168223687	168255407	+		DNA polymerase epsilon catalytic subunit A	gene	protein_coding		-42894			42894	0.0170929	6.16786e-05	9	0.0406578	1.55638e-05	112	0.315227					0
ΣT	3_182844453	3	182844453	Zm00001d042884	182846757	182851933	-		Acyl-coenzyme A oxidase	gene	protein_coding		-2304			2304	0.000230371	0.00460698	137	0.618901	1.56608e-05	113	0.318041	NAM_JL_17	ΣTT3			0
ΣT	5_79347244	5	79347244	Zm00001d015208	79389803	79395312	+		Cleavage and polyadenylation specificity factor (CPSF) A subunit protein	gene	protein_coding		-42559			42559	0.00143235	0.000746875	24	0.108421	1.57773e-05	114	0.320856					0
ΣT	6_131359162	6	131359162	Zm00001d037604	131348955	131353566	-		Ethylene response sensor 1	gene	protein_coding		10207			5596	0.000354518	0.00311078	98	0.442718	1.6231e-05	115	0.32367	NAM_JL_32	αT, γT3, ΣT3, ΣTT3			0
ΣT	1_255510762	1	255510762	Zm00001d033240	255510009	255515376	+		BTB/POZ domain-containing protein	gene	protein_coding		753			within	3.38786e-05	0.032676	807	3.64565	1.62885e-05	116	0.326485					0
ΣT	1_103283380	1	103283380	Zm00001d030069	103280320	103286276	-	outer cell layer4	Homeodomain leucine zipper family IV protein	gene	protein_coding		3060			within	0.000174802	0.00669633	199	0.898988	1.71577e-05	117	0.329299	NAM_JL_4	δT, δT3, γT3, ΣT3, ΣTT3			0
ΣT	1_216285518	1	216285518	Zm00001d032188	216280294	216286285	+		Probable mannan synthase 7	gene	protein_coding		5224			within	0.000258665	0.00454948	136	0.614384	1.72432e-05	118	0.332114					0
ΣT	2_214893763	2	214893763	Zm00001d006708	214892586	214893899	+		C2 domain containing protein	gene	protein_coding		1177			within	4.39745e-05	0.0272175	680	3.07192	1.75172e-05	119	0.334928					0
ΣT	1_219880673	1	219880673	Zm00001d032272	219876842	219879383	-			gene	protein_coding		3831	ΣT_1		1290	2.76197e-06	0.435279	9953	44.963	1.75902e-05	120	0.337743					0
ΣT	5_24408733	5	24408733	Zm00001d013908	24406779	24412871	-		Myosin heavy chain-related protein	gene	protein_coding		1954			within	2.5693e-05	0.0471819	1170	5.28551	1.77267e-05	121	0.340557	NAM_JL_24	αT, δT, γT, ΣT, δT3, γT3, ΣTT3	5_25433577	0.9	1024844	1020706
ΣT	9_145061983	9	145061983	Zm00001d047911	145078478	145081740	+		HVA22-like protein i	gene	protein_coding		-16495			16495	0.00349211	0.000348687	15	0.0677629	1.78004e-05	122	0.343372					0
ΣT	7_138270926	7	138270926	Zm00001d020975	138262824	138266459	-	methyl binding domain108	methyl binding domain108	gene	protein_coding		8102			4467	1.96107e-05	0.065196	1622	7.32743	1.86281e-05	123	0.346186					0
ΣT	5_205899900	5	205899900	Zm00001d017753	205897970	205901088	+		Carboxylic ester hydrolase	gene	protein_coding		1930			within	4.72755e-05	0.027676	691	3.12161	1.90328e-05	124	0.349001	NAM_JL_28	αT, γT, αT3, γT3			0
ΣT	4_148899179	4	148899179	Zm00001d051214	148918694	148925044	+	nitrilase2	nitrilase2	gene	protein_coding		-19515			19515	0.000196343	0.00673004	200	0.903506	1.92089e-05	125	0.351815	NAM_JL_21	δT, γT, ΣT, αT3, δT3, γT3, ΣT3, ΣTT3	4_29288877	0.34	119610302	119629817
ΣT	4_246522819	4	246522819	Zm00001d054104	246521633	246556919	+		ATP binding microtubule motor family protein	gene	protein_coding		1186			within	1.5415e-05	0.0878709	2100	9.48681	1.9657e-05	126	0.35463					0
ΣT	5_211273402	5	211273402	Zm00001d017980	211285164	211300568	-		Mitochondrial fission protein ELM1	gene	protein_coding		-11762	ΣT_5		11762	1.36011e-06	1			1.97324e-05	127	0.357444					0
ΣT	5_29802290	5	29802290	Zm00001d014033	29808369	29824010	-		Transportin MOS14	gene	protein_coding		-6079			6079	3.30143e-06	0.413489	9479	42.8216	1.97999e-05	128	0.360259	NAM_JL_24	αT, δT, γT, ΣT, δT3, γT3, ΣTT3	5_25433577	0.9	4368713	4374792
ΣT	1_219324087	1	219324087	Zm00001d032261	219333374	219346185	+		Cyclopropane-fatty-acyl-phospholipid synthase	gene	protein_coding		-9287	ΣT_1		9287	1.99456e-06	0.700968	15696	70.9071	2.02453e-05	129	0.363073					0
ΣT	5_30561860	5	30561860	Zm00001d014046	30559090	30562350	+	cyclin-dependent kinase inhibitor2	Cyclin-dependent kinase inhibitor 5	gene	protein_coding		2770			within	8.41194e-06	0.184472	4301	19.4299	2.23084e-05	130	0.365888	NAM_JL_24	αT, δT, γT, ΣT, δT3, γT3, ΣTT3	5_25433577	0.9	5128283	5125513
ΣT	10_150498584	10	150498584	Zm00001d026704	150493718	150494858	-		Thioesterase superfamily protein	gene	protein_coding		4866			3726	0.00018311	0.00853719	236	1.06614	2.24619e-05	131	0.368703					0
ΣT	8_17875989	8	17875989	Zm00001d008724	17871316	17876968	-		Protein NSP-INTERACTING KINASE 3	gene	protein_coding		4673			within	0.00136442	0.00117248	36	0.162631	2.29496e-05	132	0.371517					0
ΣT	1_240422840	1	240422840	Zm00001d032857	240404079	240408124	+		Protein kinase superfamily protein	gene	protein_coding		18761			14716	8.11074e-06	0.202576	4680	21.142	2.35267e-05	133	0.374332					0
ΣT	3_161296250	3	161296250	Zm00001d042325	161289071	161290297	+		Expressed protein%3B protein	gene	protein_coding		7179			5953	4.69013e-06	0.350924	8003	36.1538	2.35644e-05	134	0.377146	NAM_JL_15	αT			0
ΣT	4_245961520	4	245961520	Zm00001d054076	245959882	245967187	-		Protein transport protein SEC16B homolog	gene	protein_coding		1638			within	5.56654e-06	0.303899	6993	31.5911	2.41736e-05	135	0.379961					0
ΣT	5_29927578	5	29927578	Zm00001d014035	29983511	29986762	+		Pentatricopeptide repeat-containing protein mitochondrial	gene	protein_coding		-55933			55933	2.12295e-05	0.082091	1977	8.93115	2.48517e-05	136	0.382775	NAM_JL_24	αT, δT, γT, ΣT, δT3, γT3, ΣTT3	5_25433577	0.9	4494001	4549934
ΣT	4_240922569	4	240922569	Zm00001d053778	240939248	240942799	+		Cell division control protein 50	gene	protein_coding		-16679			16679	0.00211986	0.000835801	28	0.126491	2.52365e-05	137	0.38559					0
ΣT	3_152452694	3	152452694	Zm00001d042131	152441251	152450630	+		Serine/threonine-protein kinase TIO	gene	protein_coding		11443			2064	1.28821e-05	0.137885	3221	14.551	2.52956e-05	138	0.388404					0
ΣT	6_91501274	6	91501274	Zm00001d036540	91500847	91504496	+		mRNA-decapping enzyme subunit 2	gene	protein_coding		427			within	2.02586e-05	0.0883634	2113	9.54554	2.54792e-05	139	0.391219	NAM_JL_30	γT, ΣT, δT3, γT3, ΣT3, ΣTT3	6_89292276	0.07	2208998	2208571
ΣT	2_214799453	2	214799453	Zm00001d006705	214797523	214800816	+		ARM repeat superfamily protein	gene	protein_coding		1930			within	0.000705075	0.00259472	81	0.36592	2.59995e-05	140	0.394033					0
ΣT	1_44019398	1	44019398	Zm00001d028714	44013642	44016256	-		Probable RNA-binding protein ARP1	gene	protein_coding		5756			3142	0.000386333	0.00510757	150	0.677629	2.78932e-05	141	0.396848					0
ΣT	2_215021452	2	215021452	Zm00001d006713	215022021	215022959	+			gene	protein_coding		-569			569	8.85585e-06	0.223186	5154	23.2833	2.79362e-05	142	0.399662					0
ΣT	8_17627297	8	17627297	Zm00001d008716	17623710	17628383	-		NEP-interacting protein 1	gene	protein_coding		3587			within	3.00724e-06	0.678355	15170	68.5309	2.87689e-05	143	0.402477					0
ΣT	2_214253838	2	214253838	Zm00001d006684	214241634	214255713	-		Transferase%252C transferring glycosyl groups	gene	protein_coding		12204			within	4.81258e-06	0.428048	9798	44.2627	2.90314e-05	144	0.405291					0
ΣT	5_16132414	5	16132414	Zm00001d013647	16131695	16132021	-	dehydrin14	Dehydrin 13	gene	protein_coding		719			393	2.73407e-06	0.76595	17078	77.1503	2.94782e-05	145	0.408106					0
ΣT	5_24862136	5	24862136	Zm00001d013922	24857153	24857225	-			ncRNA_gene	tRNA		4983	ΣT_3		4911	2.11966e-06	1			2.98115e-05	146	0.41092	NAM_JL_24	αT, δT, γT, ΣT, δT3, γT3, ΣTT3	5_25433577	0.9	571441	576352
ΣT	2_190349096	2	190349096	Zm00001d005833	190344608	190350123	+		Protein Brevis radix-like 4	gene	protein_coding		4488			within	0.00153613	0.00142016	43	0.194254	3.06191e-05	147	0.413735	NAM_JL_11	γT, ΣT, ΣTT3	2_201952809	0.28	11603713	11602686
ΣT	5_30331120	5	30331120	Zm00001d014040	30334720	30342720	-		WD repeat-containing protein 91-like protein	gene	protein_coding		-3600			3600	4.9014e-05	0.0465478	1152	5.20419	3.19197e-05	148	0.416549	NAM_JL_24	αT, δT, γT, ΣT, δT3, γT3, ΣTT3	5_25433577	0.9	4897543	4901143
ΣT	5_27445497	5	27445497	Zm00001d013985	27475158	27485373	+			gene	protein_coding		-29661			29661	2.47402e-05	0.0930938	2229	10.0696	3.2201e-05	149	0.419364	NAM_JL_24	αT, δT, γT, ΣT, δT3, γT3, ΣTT3	5_25433577	0.9	2011920	2041581
ΣT	5_28984121	5	28984121	Zm00001d014021	28982317	28983657	+		Expressed protein%3B protein	gene	protein_coding		1804			464	7.19616e-05	0.0323289	792	3.57788	3.25031e-05	150	0.422178	NAM_JL_24	αT, δT, γT, ΣT, δT3, γT3, ΣTT3	5_25433577	0.9	3550544	3548740
ΣT	4_37973747	4	37973747	Zm00001d049624	37970635	37973407	-		Magnesium transporter CorA-like family protein	gene	protein_coding		3112			340	0.00167768	0.0013952	42	0.189736	3.2688e-05	151	0.424993	NAM_JL_21	δT, γT, ΣT, αT3, δT3, γT3, ΣT3, ΣTT3	4_29288877	0.34	8684870	8681758
ΣT	2_40116824	2	40116824	Zm00001d003319	40110400	40119860	+		OSJNBb0022F23.18 protein	gene	protein_coding		6424			within	9.32724e-06	0.253293	5827	26.3236	3.29709e-05	152	0.427807	NAM_JL_10	δT, γT, αT3, γT3, ΣT3			0
ΣT	3_151538020	3	151538020	Zm00001d042118	151576043	151577535	-		Cellular retinaldehyde-binding/triple function%252C C-terminal	gene	protein_coding		-38023			38023	1.13887e-05	0.209381	4845	21.8874	3.32563e-05	153	0.430622					0
ΣT	8_97841576	8	97841576	Zm00001d010062	97855255	97858701	-		Rop guanine nucleotide exchange factor 7	gene	protein_coding		-13679			13679	0.0131112	0.000188728	11	0.0496928	3.44183e-05	154	0.433437					0
ΣT	8_52691010	8	52691010	Zm00001d009292	52707946	52709109	-	floury3	PLATZ transcription factor family protein	gene	protein_coding		-16936			16936	0.000216007	0.0115556	315	1.42302	3.46977e-05	155	0.436251					0
ΣT	9_18798033	9	18798033	Zm00001d045313	18798784	18800901	-		F-box protein MAX2	gene	protein_coding		-751			751	8.25138e-05	0.0306077	761	3.43784	3.50776e-05	156	0.439066					0
ΣT	7_14307072	7	14307072	Zm00001d019054	14302767	14311590	+		Methylmalonate-semialdehyde dehydrogenase [acylating] mitochondrial	gene	protein_coding		4305			within	1.11485e-05	0.226587	5233	23.6402	3.50846e-05	157	0.44188	NAM_JL_35	δT3, γT3, ΣT3, ΣTT3			0
ΣT	4_1285776	4	1285776	Zm00001d048612	1286635	1292972	+		Vesicle-associated protein 1-1	gene	protein_coding		-859			859	3.67098e-06	0.706643	15821	71.4718	3.59598e-05	158	0.444695					0
ΣT	9_119473874	9	119473874	Zm00001d047130	119474567	119477638	+		Translocase of chloroplast 120 chloroplastic	gene	protein_coding		-693			693	5.96573e-06	0.436559	9984	45.103	3.60925e-05	159	0.447509					0
ΣT	5_90124982	5	90124982	Zm00001d015436	90084488	90084916	-			gene	protein_coding		40494	ΣT_4		40066	2.67934e-06	1			3.70551e-05	160	0.450324	NAM_JL_26	δT, γT, ΣT, δT3, γT3, ΣT3, ΣTT3	5_94952859	0.17	4827877	4867943
ΣT	8_43363751	8	43363751	Zm00001d009212	43471863	43480271	-		dihydrolipoyl dehydrogenases	gene	protein_coding		-108112			108112	0.00135424	0.0019967	60	0.271052	3.73715e-05	161	0.453138					0
ΣT	3_160234021	3	160234021	Zm00001d042309	160269957	160273101	+		F-box only protein 6	gene	protein_coding		-35936			35936	1.70666e-05	0.161289	3770	17.0311	3.79946e-05	162	0.455953	NAM_JL_15	αT			0
ΣT	5_30194303	5	30194303	Zm00001d014038	30230017	30235454	-		Casein kinase 1-like protein 6	gene	protein_coding		-35714			35714	4.33498e-06	0.662667	14816	66.9317	3.95284e-05	163	0.458767	NAM_JL_24	αT, δT, γT, ΣT, δT3, γT3, ΣTT3	5_25433577	0.9	4760726	4796440
ΣT	5_90213557	5	90213557	Zm00001d015437	90212611	90212916	-			gene	protein_coding		946	ΣT_4		641	2.88744e-06	1			3.97171e-05	164	0.461582	NAM_JL_26	δT, γT, ΣT, δT3, γT3, ΣT3, ΣTT3	5_94952859	0.17	4739302	4739943
ΣT	4_148795984	4	148795984	Zm00001d051211	148716630	148733408	+		Proteasome subunit alpha type	gene	protein_coding		79354			62576	0.000296156	0.0100174	273	1.23329	4.07271e-05	165	0.464396	NAM_JL_21	δT, γT, ΣT, αT3, δT3, γT3, ΣT3, ΣTT3	4_29288877	0.34	119507107	119427753
ΣT	3_16955476	3	16955476	Zm00001d039859	16955374	16956401	+	metallothionein3	Metallothionein-like protein type 2	gene	protein_coding		102			within	1.82088e-05	0.165065	3858	17.4286	4.12224e-05	166	0.467211					0
ΣT	2_19213481	2	19213481	Zm00001d002685	19212994	19214316	-		Thioredoxin-like 3-3	gene	protein_coding		487			within	0.0108772	0.000283748	12	0.0542103	4.22481e-05	167	0.470025					0
ΣT	5_24496623	5	24496623	Zm00001d013912	24516076	24518164	+		Chaperonin 60 subunit beta 2 chloroplastic	gene	protein_coding		-19453			19453	3.2018e-06	1			4.37104e-05	168	0.47284	NAM_JL_24	αT, δT, γT, ΣT, δT3, γT3, ΣTT3	5_25433577	0.9	936954	915413
ΣT	6_127274085	6	127274085	Zm00001d037497	127269091	127274746	+		Villin-1	gene	protein_coding		4994			within	0.000184394	0.0176777	480	2.16841	4.44418e-05	169	0.475654	NAM_JL_32	αT, γT3, ΣT3, ΣTT3			0
ΣT	4_1451491	4	1451491	Zm00001d048617	1457925	1458461	-		Putative RING zinc finger domain superfamily protein	gene	protein_coding		-6434			6434	3.3853e-06	1			4.60268e-05	170	0.478469					0
ΣT	9_102323596	9	102323596	Zm00001d046683	102308408	102321689	+		Stromal processing peptidase chloroplastic	gene	protein_coding		15188			1907	0.00122927	0.00291125	92	0.415613	4.84575e-05	171	0.481283	NAM_JL_45	αT, δT, γT, ΣT, αT3, δT3, γT3, ΣT3, ΣTT3	9_98832752	0.13	3490844	3475656
ΣT	2_76043464	2	76043464	Zm00001d004019	76032746	76036570	+	stearoyl-acyl-carrier-protein desaturase5	stearoyl-acyl-carrier-protein desaturase5	gene	protein_coding		10718			6894	0.00536084	0.000670421	20	0.0903506	4.86496e-05	172	0.484098	NAM_JL_10	δT, γT, αT3, γT3, ΣT3			0
ΣT	10_23886062	10	23886062	Zm00001d023838	23887314	23897377	-		Auxilin-related protein 1	gene	protein_coding		-1252			1252	0.00102147	0.0035864	108	0.487893	4.95187e-05	173	0.486912	NAM_JL_49	γT, ΣT, δT3, γT3, ΣTT3	10_20537156	0.18	3348906	3350158
ΣT	1_303932917	1	303932917	Zm00001d034858	303927049	303933356	+		Inactive protein FRIGIDA	gene	protein_coding		5868			within	0.000134642	0.0273927	683	3.08547	4.98291e-05	174	0.489727					0
ΣT	6_159545497	6	159545497	Zm00001d038537	159545684	159546748	-		F-box protein	gene	protein_coding		-187			187	0.000818781	0.00452338	135	0.609866	5.00223e-05	175	0.492542					0
ΣT	5_21507201	5	21507201	Zm00001d013827	21505251	21508854	+	MYB-related-transcription factor 99	TRF-like 5	gene	protein_coding		1950			within	6.25005e-06	0.593963	13358	60.3451	5.01303e-05	176	0.495356	NAM_JL_24	αT, δT, γT, ΣT, δT3, γT3, ΣTT3	5_25433577	0.9	3926376	3924723
ΣT	7_8495030	7	8495030	Zm00001d018891	8478320	8494304	-	chloroplast RNA processing4	chloroplast RNA processing4	gene	protein_coding		16710			726	0.0055419	0.000673803	21	0.0948681	5.04035e-05	177	0.498171					0
ΣT3	9_95909298	9	95909298	Zm00001d046558	95895575	95899061	+	homogentisate geranylgeranyl transferase1	homogentisate geranylgeranyl transferase1	gene	protein_coding	Yes	13723	ΣT3_4		10237	1.19446e-26	6.19699e-11	1	0.00451753	6.2321e-35	1	0.00283793	NAM_JL_45	αT, δT, γT, ΣT, αT3, δT3, γT3, ΣT3, ΣTT3	9_95962596	0.98	53298	63535
ΣT3	9_97093459	9	97093459	Zm00001d046582	97130617	97158426	-			gene	protein_coding		-37158	ΣT3_4		37158	6.44137e-30	1			4.39397e-28	2	0.00567585	NAM_JL_45	αT, δT, γT, ΣT, αT3, δT3, γT3, ΣT3, ΣTT3	9_95962596	0.98	1130863	1168021
ΣT3	9_95392601	9	95392601	Zm00001d046549	95423390	95429102	-		110 kDa U5 small nuclear ribonucleoprotein component CLO	gene	protein_coding		-30789	ΣT3_4		30789	5.65617e-26	0.00070914	54	0.243947	2.66275e-27	3	0.00851378	NAM_JL_45	αT, δT, γT, ΣT, αT3, δT3, γT3, ΣT3, ΣTT3	9_95962596	0.98	569995	533494
ΣT3	9_95827231	9	95827231	Zm00001d046555	95832622	95834867	-	embryo specific18	embryo specific18	gene	protein_coding		-5391	ΣT3_4		5391	3.8409e-24	4.12544e-05	7	0.0316227	1.03014e-26	4	0.0113517	NAM_JL_45	αT, δT, γT, ΣT, αT3, δT3, γT3, ΣT3, ΣTT3	9_95962596	0.98	135365	127729
ΣT3	9_95963918	9	95963918	Zm00001d046560	95961757	95965827	+		ATPase 8 plasma membrane-type	gene	protein_coding		2161	ΣT3_4		within	1.62842e-28	1			1.05822e-26	5	0.0141896	NAM_JL_45	αT, δT, γT, ΣT, αT3, δT3, γT3, ΣT3, ΣTT3	9_95962596	0.98	1322	within
ΣT3	9_96811373	9	96811373	Zm00001d046579	96779812	96809887	+		Transcription initiation factor TFIID subunit 1	gene	protein_coding		31561	ΣT3_4		1486	5.60801e-28	0.58884	13768	62.1973	2.1226e-26	6	0.0170276	NAM_JL_45	αT, δT, γT, ΣT, αT3, δT3, γT3, ΣT3, ΣTT3	9_95962596	0.98	848777	817216
ΣT3	9_95230645	9	95230645	Zm00001d046545	95156721	95195559	-			gene	protein_coding		73924	ΣT3_4		35086	2.48328e-26	0.458778	11173	50.4743	6.91959e-25	7	0.0198655	NAM_JL_45	αT, δT, γT, ΣT, αT3, δT3, γT3, ΣT3, ΣTT3	9_95962596	0.98	731951	767037
ΣT3	9_95766888	9	95766888	Zm00001d046554	95762282	95767578	-		Copine-1%253B Copine-1 isoform 1%253B Copine-1 isoform 2	gene	protein_coding		4606	ΣT3_4		within	4.90982e-25	0.0910746	2835	12.8072	2.65476e-24	8	0.0227034	NAM_JL_45	αT, δT, γT, ΣT, αT3, δT3, γT3, ΣT3, ΣTT3	9_95962596	0.98	195708	195018
ΣT3	9_96226187	9	96226187	Zm00001d046568	96269799	96278036	+	knotted related homeobox2	knotted related homeobox2	gene	protein_coding		-43612	ΣT3_4		43612	1.08329e-25	0.576446	13530	61.1222	3.68652e-24	9	0.0255413	NAM_JL_45	αT, δT, γT, ΣT, αT3, δT3, γT3, ΣT3, ΣTT3	9_95962596	0.98	263591	307203
ΣT3	9_95057149	9	95057149	Zm00001d046543	95052868	95052940	+			ncRNA_gene	tRNA		4281	ΣT3_4		4209	1.46616e-25	1			8.53038e-24	10	0.0283793	NAM_JL_45	αT, δT, γT, ΣT, αT3, δT3, γT3, ΣT3, ΣTT3	9_95962596	0.98	905447	909656
ΣT3	9_96538941	9	96538941	Zm00001d046574	96556993	96557319	-			gene	protein_coding		-18052	ΣT3_4		18052	1.45672e-24	0.919878	20474	92.4919	7.49994e-23	11	0.0312172	NAM_JL_45	αT, δT, γT, ΣT, αT3, δT3, γT3, ΣT3, ΣTT3	9_95962596	0.98	576345	594397
ΣT3	9_96083411	9	96083411	Zm00001d046564	96085990	96091648	+	bZIP-transcription factor 93	Putative bZIP transcription factor superfamily protein [Source:UniProtKB/TrEMBL%3BAcc:B7ZYA0]	gene	protein_coding		-2579	ΣT3_4		2579	2.74266e-24	0.89948	20074	90.6849	1.36569e-22	12	0.0340551	NAM_JL_45	αT, δT, γT, ΣT, αT3, δT3, γT3, ΣT3, ΣTT3	9_95962596	0.98	120815	123394
ΣT3	9_97280859	9	97280859	Zm00001d027142	97239863	97240233	+			ncRNA_gene	lincRNA		40996	ΣT3_4		40626	6.42257e-24	1			3.49402e-22	13	0.036893	NAM_JL_45	αT, δT, γT, ΣT, αT3, δT3, γT3, ΣT3, ΣTT3	9_95962596	0.98	1318263	1277267
ΣT3	9_95476438	9	95476438	Zm00001d027141	95504913	95505404	-			ncRNA_gene	lincRNA		-28475	ΣT3_4		28475	6.63063e-23	1			3.45242e-21	14	0.039731	NAM_JL_45	αT, δT, γT, ΣT, αT3, δT3, γT3, ΣT3, ΣTT3	9_95962596	0.98	486158	457192
ΣT3	9_95943007	9	95943007	Zm00001d046559	95956438	95960560	-			gene	protein_coding		-13431	ΣT3_4		13431	1.91875e-22	1			9.78661e-21	15	0.0425689	NAM_JL_45	αT, δT, γT, ΣT, αT3, δT3, γT3, ΣT3, ΣTT3	9_95962596	0.98	19589	2036
ΣT3	9_94904467	9	94904467	Zm00001d046542	94885059	94885415	+			gene	protein_coding		19408	ΣT3_4		19052	2.75119e-22	1			1.39333e-20	16	0.0454068	NAM_JL_45	αT, δT, γT, ΣT, αT3, δT3, γT3, ΣT3, ΣTT3	9_95962596	0.98	1058129	1077181
ΣT3	9_96012482	9	96012482	Zm00001d046563	96016421	96018174	+			gene	protein_coding		-3939	ΣT3_4		3939	3.0459e-22	1			1.53949e-20	17	0.0482447	NAM_JL_45	αT, δT, γT, ΣT, αT3, δT3, γT3, ΣT3, ΣTT3	9_95962596	0.98	49886	53825
ΣT3	9_97430648	9	97430648	Zm00001d046587	97428880	97438298	-		transducin family protein / WD-40 repeat family protein	gene	protein_coding		1768	ΣT3_4		within	3.22e-20	0.0173848	731	3.30231	2.7953e-20	18	0.0510827	NAM_JL_45	αT, δT, γT, ΣT, αT3, δT3, γT3, ΣT3, ΣTT3	9_95962596	0.98	1468052	1466284
ΣT3	9_97454721	9	97454721	Zm00001d046590	97452571	97463456	-		Protein S-acyltransferase 24	gene	protein_coding		2150	ΣT3_4		within	3.22e-20	0.0254089	999	4.51301	4.05442e-20	19	0.0539206	NAM_JL_45	αT, δT, γT, ΣT, αT3, δT3, γT3, ΣT3, ΣTT3	9_95962596	0.98	1492125	1489975
ΣT3	9_96176511	9	96176511	Zm00001d046566	96094106	96097864	-		Nuclear pore complex protein NUP96	gene	protein_coding		82405	ΣT3_4		78647	6.38157e-21	1			3.0313e-19	20	0.0567585	NAM_JL_45	αT, δT, γT, ΣT, αT3, δT3, γT3, ΣT3, ΣTT3	9_95962596	0.98	213915	131510
ΣT3	9_97774316	9	97774316	Zm00001d046595	97773604	97780433	+		Putative sucrose-phosphate synthase family protein	gene	protein_coding		712	ΣT3_4		within	3.22368e-19	0.0413536	1476	6.66787	6.23417e-19	21	0.0595964	NAM_JL_45	αT, δT, γT, ΣT, αT3, δT3, γT3, ΣT3, ΣTT3	9_95962596	0.98	1811720	1811008
ΣT3	9_97430648	9	97430648	Zm00001d046588	97435933	97436004	-			ncRNA_gene	tRNA		-5285	ΣT3_4		5285	3.22e-20	1			1.47741e-18	22	0.0624344	NAM_JL_45	αT, δT, γT, ΣT, αT3, δT3, γT3, ΣT3, ΣTT3	9_95962596	0.98	1468052	1473337
ΣT3	9_96764413	9	96764413	Zm00001d046576	96775849	96776370	-		Protein argonaute 13	gene	protein_coding		-11436	ΣT3_4		11436	5.85729e-20	1			2.65242e-18	23	0.0652723	NAM_JL_45	αT, δT, γT, ΣT, αT3, δT3, γT3, ΣT3, ΣTT3	9_95962596	0.98	801817	813253
ΣT3	9_96925124	9	96925124	Zm00001d046581	96875104	96896745	-		Isoleucine--tRNA ligase cytoplasmic	gene	protein_coding		50020	ΣT3_4		28379	3.25298e-19	0.26331	6938	31.3426	3.84621e-18	24	0.0681102	NAM_JL_45	αT, δT, γT, ΣT, αT3, δT3, γT3, ΣT3, ΣTT3	9_95962596	0.98	962528	912508
ΣT3	9_97922225	9	97922225	Zm00001d046597	97931274	97932234	-			gene	protein_coding		-9049	ΣT3_4		9049	1.52154e-19	1			6.74488e-18	25	0.0709482	NAM_JL_45	αT, δT, γT, ΣT, αT3, δT3, γT3, ΣT3, ΣTT3	9_95962596	0.98	1959629	1968678
ΣT3	9_95973059	9	95973059	Zm00001d046562	95972136	95972208	+			ncRNA_gene	tRNA		923	ΣT3_4		851	3.91936e-19	1			1.70034e-17	26	0.0737861	NAM_JL_45	αT, δT, γT, ΣT, αT3, δT3, γT3, ΣT3, ΣTT3	9_95962596	0.98	10463	9540
ΣT3	9_97231474	9	97231474	Zm00001d046583	97236468	97238511	-		40S ribosomal protein S14	gene	protein_coding		-4994	ΣT3_4		4994	1.48503e-18	0.314402	8073	36.47	2.01738e-17	27	0.076624	NAM_JL_45	αT, δT, γT, ΣT, αT3, δT3, γT3, ΣT3, ΣTT3	9_95962596	0.98	1268878	1273872
ΣT3	9_98780634	9	98780634	Zm00001d046611	98772481	98777453	+		Serine/threonine-protein kinase RUNKEL	gene	protein_coding		8153	ΣT3_4		3181	7.49237e-19	1			3.20188e-17	28	0.0794619	NAM_JL_45	αT, δT, γT, ΣT, αT3, δT3, γT3, ΣT3, ΣTT3	9_95962596	0.98	2818038	2809885
ΣT3	5_86085552	5	86085552	Zm00001d015356	86084655	86086755	-	4-hydroxyphenylpyruvate dioxygenase 1	4-hydroxyphenylpyruvate dioxygenase 1	gene	protein_coding	Yes	897	ΣT3_2	5_86085552	within	2.99523e-16	0.00655335	359	1.62179	8.19937e-17	29	0.0822999	NAM_JL_26	δT, γT, ΣT, δT3, γT3, ΣT3, ΣTT3	5_86086930	0.85	1378	175
ΣT3	9_97316650	9	97316650	Zm00001d046585	97342384	97342803	+			gene	protein_coding		-25734	ΣT3_4		25734	1.23905e-17	1			4.94748e-16	30	0.0851378	NAM_JL_45	αT, δT, γT, ΣT, αT3, δT3, γT3, ΣT3, ΣTT3	9_95962596	0.98	1354054	1379788
ΣT3	9_98965891	9	98965891	Zm00001d046619	99018251	99018321	+			ncRNA_gene	tRNA		-52360	ΣT3_4		52360	2.03502e-17	1			8.02478e-16	31	0.0879757	NAM_JL_45	αT, δT, γT, ΣT, αT3, δT3, γT3, ΣT3, ΣTT3	9_95962596	0.98	3003295	3055655
ΣT3	9_94385305	9	94385305	Zm00001d046533	94356499	94362871	+		nucleoporin-related	gene	protein_coding		28806	ΣT3_4		22434	5.68873e-17	0.742334	16924	76.4546	1.63442e-15	32	0.0908136	NAM_JL_45	αT, δT, γT, ΣT, αT3, δT3, γT3, ΣT3, ΣTT3	9_95962596	0.98	1577291	1599725
ΣT3	9_98847244	9	98847244	Zm00001d046616	98847757	98851557	-		Protein kinase superfamily protein	gene	protein_coding		-513	ΣT3_4		513	2.25027e-16	0.518622	12369	55.8773	4.39821e-15	33	0.0936516	NAM_JL_45	αT, δT, γT, ΣT, αT3, δT3, γT3, ΣT3, ΣTT3	9_95962596	0.98	2884648	2885161
ΣT3	9_94750720	9	94750720	Zm00001d046539	94817071	94823847	+		26S protease regulatory subunit S10B homolog B	gene	protein_coding		-66351	ΣT3_4		66351	2.33699e-16	0.691706	15887	71.77	6.03946e-15	34	0.0964895	NAM_JL_45	αT, δT, γT, ΣT, αT3, δT3, γT3, ΣT3, ΣTT3	9_95962596	0.98	1211876	1138749
ΣT3	9_95762025	9	95762025	Zm00001d046553	95755367	95762132	+		Fructose-bisphosphate aldolase 7 cytosolic	gene	protein_coding		6658	ΣT3_4		within	2.03575e-15	0.0877441	2745	12.4006	6.65578e-15	35	0.0993274	NAM_JL_45	αT, δT, γT, ΣT, αT3, δT3, γT3, ΣT3, ΣTT3	9_95962596	0.98	200571	200464
ΣT3	9_94716481	9	94716481	Zm00001d046538	94662146	94667640	-		Sec14p-like phosphatidylinositol transfer family protein	gene	protein_coding		54335	ΣT3_4		48841	1.99963e-15	0.123096	3593	16.2315	9.09283e-15	36	0.102165	NAM_JL_45	αT, δT, γT, ΣT, αT3, δT3, γT3, ΣT3, ΣTT3	9_95962596	0.98	1246115	1294956
ΣT3	9_94523586	9	94523586	Zm00001d046535	94503734	94505652	+		Phosphatidylcholine:diacylglycerol cholinephosphotransferase 1	gene	protein_coding		19852	ΣT3_4		17934	3.27896e-13	0.00141246	100	0.451753	1.68159e-14	37	0.105003	NAM_JL_45	αT, δT, γT, ΣT, αT3, δT3, γT3, ΣT3, ΣTT3	9_95962596	0.98	1439010	1456944
ΣT3	9_98463861	9	98463861	Zm00001d046603	98458436	98460079	-		Putative cytochrome P450 superfamily protein	gene	protein_coding		5425	ΣT3_4		3782	7.8629e-16	1			2.81328e-14	38	0.107841	NAM_JL_45	αT, δT, γT, ΣT, αT3, δT3, γT3, ΣT3, ΣTT3	9_95962596	0.98	2501265	2495840
ΣT3	9_96325868	9	96325868	Zm00001d046569	96322136	96327889	-		Protein kinase superfamily protein with octicosapeptide/Phox/Bem1p domain	gene	protein_coding		3732	ΣT3_4		within	2.69836e-14	0.1628	4552	20.5638	1.49617e-13	39	0.110679	NAM_JL_45	αT, δT, γT, ΣT, αT3, δT3, γT3, ΣT3, ΣTT3	9_95962596	0.98	363272	359540
ΣT3	9_92153783	9	92153783	Zm00001d046489	92154833	92157937	-			gene	protein_coding		-1050	ΣT3_4		1050	6.53465e-11	0.000474111	37	0.167149	9.94673e-13	40	0.113517	NAM_JL_45	αT, δT, γT, ΣT, αT3, δT3, γT3, ΣT3, ΣTT3	9_95962596	0.98	3808813	3804659
ΣT3	9_95967313	9	95967313	Zm00001d046561	95968172	95971622	-		Protein kinase superfamily protein	gene	protein_coding		-859	ΣT3_4		859	5.19029e-12	0.0116076	534	2.41236	1.89418e-12	41	0.116355	NAM_JL_45	αT, δT, γT, ΣT, αT3, δT3, γT3, ΣT3, ΣTT3	9_95962596	0.98	4717	5576
ΣT3	9_98839360	9	98839360	Zm00001d046613	98839260	98845509	+		Elongator complex protein 4	gene	protein_coding		100	ΣT3_4		within	7.66036e-10	0.000168838	15	0.0677629	3.96756e-12	42	0.119193	NAM_JL_45	αT, δT, γT, ΣT, αT3, δT3, γT3, ΣT3, ΣTT3	9_95962596	0.98	2876764	2876664
ΣT3	9_94829820	9	94829820	Zm00001d046540	94826683	94831760	+		C2 and GRAM domain-containing protein	gene	protein_coding		3137	ΣT3_4		within	2.22376e-13	1			6.70117e-12	43	0.122031	NAM_JL_45	αT, δT, γT, ΣT, αT3, δT3, γT3, ΣT3, ΣTT3	9_95962596	0.98	1132776	1130836
ΣT3	9_97853480	9	97853480	Zm00001d046596	97904170	97905084	-		Bifunctional inhibitor/lipid-transfer protein/seed storage 2S albumin superfamily protein	gene	protein_coding		-50690	ΣT3_4		50690	4.20923e-12	0.115189	3399	15.3551	1.4233e-11	44	0.124869	NAM_JL_45	αT, δT, γT, ΣT, αT3, δT3, γT3, ΣT3, ΣTT3	9_95962596	0.98	1890884	1941574
ΣT3	9_95653731	9	95653731	Zm00001d046552	95727707	95731224	+		Charged multivesicular body protein 4b%253B Putative SNF domain containing family protein	gene	protein_coding		-73976	ΣT3_4		73976	2.5345e-12	0.240417	6404	28.9302	1.77478e-11	45	0.127707	NAM_JL_45	αT, δT, γT, ΣT, αT3, δT3, γT3, ΣT3, ΣTT3	9_95962596	0.98	308865	231372
ΣT3	9_93868450	9	93868450	Zm00001d027140	93916559	93917433	-			ncRNA_gene	lincRNA		-48109	ΣT3_4		48109	1.22931e-12	1			3.49425e-11	46	0.130545	NAM_JL_45	αT, δT, γT, ΣT, αT3, δT3, γT3, ΣT3, ΣTT3	9_95962596	0.98	2094146	2045163
ΣT3	9_92092069	9	92092069	Zm00001d046488	92065625	92071211	-		Leucine-rich repeat protein kinase family protein	gene	protein_coding		26444	ΣT3_4		20858	4.89359e-11	0.0265793	1037	4.68468	3.68979e-11	47	0.133383	NAM_JL_45	αT, δT, γT, ΣT, αT3, δT3, γT3, ΣT3, ΣTT3	9_95962596	0.98	3870527	3891385
ΣT3	9_96453722	9	96453722	Zm00001d046571	96437176	96440002	+		Putative HLH DNA-binding domain superfamily protein	gene	protein_coding		16546	ΣT3_4		13720	3.91639e-12	1			1.06784e-10	48	0.13622	NAM_JL_45	αT, δT, γT, ΣT, αT3, δT3, γT3, ΣT3, ΣTT3	9_95962596	0.98	491126	474580
ΣT3	9_77342349	9	77342349	Zm00001d046267	77352323	77357618	+			gene	protein_coding		-9974	ΣT3_4		9974	9.42553e-12	1			2.48717e-10	49	0.139058	NAM_JL_45	αT, δT, γT, ΣT, αT3, δT3, γT3, ΣT3, ΣTT3	9_95962596	0.98	18620247	18604978
ΣT3	9_94218715	9	94218715	Zm00001d046531	94211896	94217211	-		Protein WVD2-like 5	gene	protein_coding		6819	ΣT3_4		1504	1.28035e-10	0.0951553	2945	13.3041	3.18358e-10	50	0.141896	NAM_JL_45	αT, δT, γT, ΣT, αT3, δT3, γT3, ΣT3, ΣTT3	9_95962596	0.98	1743881	1745385
ΣT3	9_73761951	9	73761951	Zm00001d046234	73800614	73803659	-		Inositol oxygenase 2	gene	protein_coding		-38663	ΣT3_4		38663	2.43743e-09	0.00502247	286	1.29201	3.19834e-10	51	0.144734	NAM_JL_45	αT, δT, γT, ΣT, αT3, δT3, γT3, ΣT3, ΣTT3	9_95962596	0.98	22200645	22158937
ΣT3	9_78924664	9	78924664	Zm00001d046298	78902785	78903875	+		Nuclear pore complex protein GP210	gene	protein_coding		21879	ΣT3_4		20789	2.55122e-11	1			6.47803e-10	52	0.147572	NAM_JL_45	αT, δT, γT, ΣT, αT3, δT3, γT3, ΣT3, ΣTT3	9_95962596	0.98	17037932	17058721
ΣT3	5_88007638	5	88007638	Zm00001d015393	88008824	88012844	-		10A19I.15	gene	protein_coding		-1186	ΣT3_2		1186	6.44362e-11	0.465977	11309	51.0887	7.57519e-10	53	0.15041	NAM_JL_26	δT, γT, ΣT, δT3, γT3, ΣT3, ΣTT3	5_86086930	0.85	1920708	1921894
ΣT3	9_102753856	9	102753856	Zm00001d046695	102720487	102720801	+			gene	protein_coding		33369	ΣT3_4		33055	5.42569e-11	1			1.33674e-09	54	0.153248	NAM_JL_45	αT, δT, γT, ΣT, αT3, δT3, γT3, ΣT3, ΣTT3	9_95962596	0.98	6791260	6757891
ΣT3	9_94657863	9	94657863	Zm00001d046537	94659231	94661958	-		ABC transporter G family member 26	gene	protein_coding		-1368	ΣT3_4		1368	7.63698e-11	1			1.85544e-09	55	0.156086	NAM_JL_45	αT, δT, γT, ΣT, αT3, δT3, γT3, ΣT3, ΣTT3	9_95962596	0.98	1304733	1300638
ΣT3	9_97679224	9	97679224	Zm00001d046593	97674582	97680959	+	acid phosphatase1	acid phosphatase1	gene	protein_coding		4642	ΣT3_4		within	1.58211e-10	0.537411	12722	57.472	2.05657e-09	56	0.158924	NAM_JL_45	αT, δT, γT, ΣT, αT3, δT3, γT3, ΣT3, ΣTT3	9_95962596	0.98	1716628	1711986
ΣT3	5_61159296	5	61159296	Zm00001d014742	61158657	61162310	+		F-box protein SKIP31	gene	protein_coding		639	ΣT3_1		within	1.0932e-10	0.924321	20571	92.9301	2.42669e-09	57	0.161762	NAM_JL_25	αT3, ΣT3	5_61111888	0.97	47408	46769
ΣT3	9_94207889	9	94207889	Zm00001d046530	94210411	94211858	+		Tetratricopeptide repeat (TPR)-like superfamily protein	gene	protein_coding		-2522	ΣT3_4		2522	2.64825e-10	0.481511	11625	52.5163	3.03269e-09	58	0.1646	NAM_JL_45	αT, δT, γT, ΣT, αT3, δT3, γT3, ΣT3, ΣTT3	9_95962596	0.98	1754707	1750738
ΣT3	9_101914714	9	101914714	Zm00001d046676	101918009	101919782	+		tryptophan synthase beta type 2	gene	protein_coding		-3295	ΣT3_4		3295	1.79449e-10	0.721075	16490	74.494	3.07551e-09	59	0.167438	NAM_JL_45	αT, δT, γT, ΣT, αT3, δT3, γT3, ΣT3, ΣTT3	9_95962596	0.98	5952118	5955413
ΣT3	9_97938167	9	97938167	Zm00001d046598	97932553	97936078	+			gene	protein_coding		5614	ΣT3_4		2089	1.77878e-09	0.0960641	2972	13.4261	4.01392e-09	60	0.170276	NAM_JL_45	αT, δT, γT, ΣT, αT3, δT3, γT3, ΣT3, ΣTT3	9_95962596	0.98	1975571	1969957
ΣT3	9_101659837	9	101659837	Zm00001d046672	101701192	101705340	+			gene	protein_coding		-41355	ΣT3_4		41355	5.5245e-10	0.375924	9390	42.4196	4.8379e-09	61	0.173113	NAM_JL_45	αT, δT, γT, ΣT, αT3, δT3, γT3, ΣT3, ΣTT3	9_95962596	0.98	5697241	5738596
ΣT3	9_101654955	9	101654955	Zm00001d046671	101608038	101612532	+		40S ribosomal protein S4-3	gene	protein_coding		46917	ΣT3_4		42423	2.37148e-10	1			5.49291e-09	62	0.175951	NAM_JL_45	αT, δT, γT, ΣT, αT3, δT3, γT3, ΣT3, ΣTT3	9_95962596	0.98	5692359	5645442
ΣT3	9_99098216	9	99098216	Zm00001d046621	99138564	99141663	+	glossy15	Floral homeotic protein APETALA 2	gene	protein_coding		-40348	ΣT3_4		40348	3.51668e-10	1			8.0069e-09	63	0.178789	NAM_JL_45	αT, δT, γT, ΣT, αT3, δT3, γT3, ΣT3, ΣTT3	9_95962596	0.98	3135620	3175968
ΣT3	9_94407578	9	94407578	Zm00001d046534	94413654	94418069	+		Glycosyl hydrolase superfamily protein	gene	protein_coding		-6076	ΣT3_4		6076	5.02665e-09	0.0732651	2372	10.7156	8.36808e-09	64	0.181627	NAM_JL_45	αT, δT, γT, ΣT, αT3, δT3, γT3, ΣT3, ΣTT3	9_95962596	0.98	1555018	1544527
ΣT3	9_94611834	9	94611834	Zm00001d046536	94610474	94611871	+		Retrovirus-related Pol polyprotein LINE-1	gene	protein_coding		1360	ΣT3_4		within	4.32184e-10	1			9.751e-09	65	0.184465	NAM_JL_45	αT, δT, γT, ΣT, αT3, δT3, γT3, ΣT3, ΣTT3	9_95962596	0.98	1350762	1350725
ΣT3	9_94143609	9	94143609	Zm00001d046529	94134221	94142110	-			gene	protein_coding		9388	ΣT3_4		1499	4.73702e-10	1			1.06443e-08	66	0.187303	NAM_JL_45	αT, δT, γT, ΣT, αT3, δT3, γT3, ΣT3, ΣTT3	9_95962596	0.98	1818987	1820486
ΣT3	9_94333259	9	94333259	Zm00001d046532	94351762	94355927	+			gene	protein_coding		-18503	ΣT3_4		18503	5.51604e-10	1			1.23108e-08	67	0.190141	NAM_JL_45	αT, δT, γT, ΣT, αT3, δT3, γT3, ΣT3, ΣTT3	9_95962596	0.98	1629337	1606669
ΣT3	9_101746958	9	101746958	Zm00001d046673	101776745	101776942	-			gene	protein_coding		-29787	ΣT3_4		29787	5.5245e-10	1			1.23288e-08	68	0.192979	NAM_JL_45	αT, δT, γT, ΣT, αT3, δT3, γT3, ΣT3, ΣTT3	9_95962596	0.98	5784362	5814149
ΣT3	9_97673722	9	97673722	Zm00001d046592	97669727	97674265	-		ER membrane protein complex subunit 7 homolog	gene	protein_coding		3995	ΣT3_4		within	6.92134e-10	0.929352	20675	93.3999	1.4257e-08	69	0.195817	NAM_JL_45	αT, δT, γT, ΣT, αT3, δT3, γT3, ΣT3, ΣTT3	9_95962596	0.98	1711126	1707131
ΣT3	5_86078936	5	86078936	Zm00001d015355	86080662	86081459	+		Urease accessory protein F	gene	protein_coding		-1726	ΣT3_2		1726	9.87446e-10	0.727215	16610	75.0361	1.5837e-08	70	0.198655	NAM_JL_26	δT, γT, ΣT, δT3, γT3, ΣT3, ΣTT3	5_86086930	0.85	7994	5471
ΣT3	9_98839360	9	98839360	Zm00001d046614	98840365	98840652	-			gene	protein_coding		-1005	ΣT3_4		1005	7.66036e-10	1			1.6845e-08	71	0.201493	NAM_JL_45	αT, δT, γT, ΣT, αT3, δT3, γT3, ΣT3, ΣTT3	9_95962596	0.98	2876764	2877769
ΣT3	9_98839360	9	98839360	Zm00001d046615	98843549	98843620	+			ncRNA_gene	tRNA		-4189	ΣT3_4		4189	7.66036e-10	1			1.6845e-08	72	0.204331	NAM_JL_45	αT, δT, γT, ΣT, αT3, δT3, γT3, ΣT3, ΣTT3	9_95962596	0.98	2876764	2880953
ΣT3	9_92162816	9	92162816	Zm00001d046490	92160670	92162718	-		NADP-dependent oxidoreductase P2%253B Putative alcohol dehydrogenase superfamily protein	gene	protein_coding		2146			98	4.3302e-07	0.00183132	121	0.546621	1.74104e-08	73	0.207169	NAM_JL_45	αT, δT, γT, ΣT, αT3, δT3, γT3, ΣT3, ΣTT3	9_95962596	0.98	3799780	3799878
ΣT3	9_99051913	9	99051913	Zm00001d046620	99030711	99031235	-			gene	protein_coding		21202	ΣT3_4		20678	9.85313e-10	1			2.14188e-08	74	0.210007	NAM_JL_45	αT, δT, γT, ΣT, αT3, δT3, γT3, ΣT3, ΣTT3	9_95962596	0.98	3089317	3068115
ΣT3	9_97997410	9	97997410	Zm00001d046599	98003371	98003985	-	supernumerary aleurone1	Supernumerary aleurone1	gene	protein_coding		-5961	ΣT3_4		5961	1.30168e-09	0.875836	19599	88.539	2.46164e-08	75	0.212844	NAM_JL_45	αT, δT, γT, ΣT, αT3, δT3, γT3, ΣT3, ΣTT3	9_95962596	0.98	2034814	2040775
ΣT3	9_89348243	9	89348243	Zm00001d046424	89351972	89352930	-		Agglutinin-2	gene	protein_coding		-3729	ΣT3_4		3729	1.24485e-09	1			2.67696e-08	76	0.215682	NAM_JL_45	αT, δT, γT, ΣT, αT3, δT3, γT3, ΣT3, ΣTT3	9_95962596	0.98	6614353	6609666
ΣT3	9_29394010	9	29394010	Zm00001d045631	29285315	29290140	+		Acyl-CoA N-acyltransferase with RING/FYVE/PHD-type zinc finger domain	gene	protein_coding		108695			103870	4.37075e-07	0.00284917	181	0.817673	2.67788e-08	77	0.21852	NAM_JL_45	αT, δT, γT, ΣT, αT3, δT3, γT3, ΣT3, ΣTT3	9_95962596	0.98	66568586	66672456
ΣT3	9_25114786	9	25114786	Zm00001d045515	25084738	25087293	+		Putative receptor-like protein kinase family protein	gene	protein_coding		30048	ΣT3_3		27493	1.70114e-09	1			3.60504e-08	78	0.221358					0
ΣT3	9_25192793	9	25192793	Zm00001d045516	25240624	25249861	+		Probable transcriptional regulator SLK2	gene	protein_coding		-47831	ΣT3_3		47831	9.91714e-08	0.02658	1038	4.68919	5.47072e-08	79	0.224196					0
ΣT3	9_34517261	9	34517261	Zm00001d045706	34496670	34509714	+	restorer of fertility2	Restorer of fertility2	gene	protein_coding		20591			7547	1.47945e-07	0.0189937	778	3.51464	5.81396e-08	80	0.227034	NAM_JL_45	αT, δT, γT, ΣT, αT3, δT3, γT3, ΣT3, ΣTT3	9_95962596	0.98	61445335	61452882
ΣT3	9_31072798	9	31072798	Zm00001d045650	31087032	31092256	+		Signal recognition particle 9 kDa protein	gene	protein_coding		-14234	ΣT3_3		14234	9.03282e-09	0.360309	9049	40.8791	6.686e-08	81	0.229872	NAM_JL_45	αT, δT, γT, ΣT, αT3, δT3, γT3, ΣT3, ΣTT3	9_95962596	0.98	64889798	64870340
ΣT3	9_99408767	9	99408767	Zm00001d046624	99409598	99416154	+		Probable E3 ubiquitin ligase SUD1	gene	protein_coding		-831	ΣT3_4		831	5.28685e-08	0.0626249	2091	9.44615	6.79593e-08	82	0.23271	NAM_JL_45	αT, δT, γT, ΣT, αT3, δT3, γT3, ΣT3, ΣTT3	9_95962596	0.98	3446171	3447002
ΣT3	9_25853543	9	25853543	Zm00001d045540	25852225	25855075	+			gene	protein_coding		1318			within	1.27904e-06	0.00326446	200	0.903506	8.47356e-08	83	0.235548					0
ΣT3	9_78756360	9	78756360	Zm00001d027123	78772793	78773164	+			ncRNA_gene	lincRNA		-16433	ΣT3_4		16433	4.25715e-09	1			8.63123e-08	84	0.238386	NAM_JL_45	αT, δT, γT, ΣT, αT3, δT3, γT3, ΣT3, ΣTT3	9_95962596	0.98	17206236	17189432
ΣT3	5_61119396	5	61119396	Zm00001d014737	61117986	61119432	+		Arogenate dehydrogenase 1 chloroplastic	gene	protein_coding	Yes	1410	ΣT3_1		within	5.33484e-09	0.810614	18308	82.7069	8.76098e-08	85	0.241224	NAM_JL_25	αT3, ΣT3	5_61111888	0.97	7508	6098
ΣT3	9_93518600	9	93518600	Zm00001d046521	93513252	93518345	+		Vacuolar protein sorting-associated protein 9A	gene	protein_coding		5348	ΣT3_4		255	1.48232e-08	0.303564	7792	35.2006	9.09823e-08	86	0.244062	NAM_JL_45	αT, δT, γT, ΣT, αT3, δT3, γT3, ΣT3, ΣTT3	9_95962596	0.98	2443996	2444251
ΣT3	9_78830959	9	78830959	Zm00001d046297	78828543	78829768	+		Protodermal factor 1	gene	protein_coding		2416	ΣT3_4		1191	8.50754e-08	0.0624763	2089	9.43712	1.06584e-07	87	0.2469	NAM_JL_45	αT, δT, γT, ΣT, αT3, δT3, γT3, ΣT3, ΣTT3	9_95962596	0.98	17131637	17132828
ΣT3	9_79082798	9	79082798	Zm00001d046299	79124493	79126324	+	HSF-transcription factor 28	HSF28 HSF type transcription factor	gene	protein_coding		-41695			41695	3.74721e-06	0.00142044	101	0.45627	1.06727e-07	88	0.249737	NAM_JL_45	αT, δT, γT, ΣT, αT3, δT3, γT3, ΣT3, ΣTT3	9_95962596	0.98	16879798	16836272
ΣT3	9_94130190	9	94130190	Zm00001d046527	94131233	94132903	-		F-box protein SKIP19	gene	protein_coding		-1043	ΣT3_4		1043	5.37193e-09	1			1.07665e-07	89	0.252575	NAM_JL_45	αT, δT, γT, ΣT, αT3, δT3, γT3, ΣT3, ΣTT3	9_95962596	0.98	1832406	1829693
ΣT3	9_29507019	9	29507019	Zm00001d045632	29535058	29540801	+		U-box domain-containing protein 14	gene	protein_coding		-28039	ΣT3_3		28039	1.04596e-07	0.0675753	2221	10.0334	1.39721e-07	90	0.255413	NAM_JL_45	αT, δT, γT, ΣT, αT3, δT3, γT3, ΣT3, ΣTT3	9_95962596	0.98	66455577	66421795
ΣT3	9_102812295	9	102812295	Zm00001d046696	102808063	102808878	-		AT-hook motif nuclear-localized protein 29	gene	protein_coding		4232	ΣT3_4		3417	7.19272e-09	1			1.42058e-07	91	0.258251	NAM_JL_45	αT, δT, γT, ΣT, αT3, δT3, γT3, ΣT3, ΣTT3	9_95962596	0.98	6849699	6845467
ΣT3	5_88097199	5	88097199	Zm00001d015394	88146164	88150303	+	PLATZ-transcription factor 8	PLATZ transcription factor family protein	gene	protein_coding		-48965	ΣT3_2		48965	6.74033e-08	0.106925	3221	14.551	1.42328e-07	92	0.261089	NAM_JL_26	δT, γT, ΣT, δT3, γT3, ΣT3, ΣTT3	5_86086930	0.85	2010269	2059234
ΣT3	9_92312727	9	92312727	Zm00001d046492	92290431	92299586	-	elongated mesocotyl2	elongated mesocotyl2	gene	protein_coding		22296	ΣT3_4		13141	3.73215e-08	0.222619	5970	26.9696	1.62896e-07	93	0.263927	NAM_JL_45	αT, δT, γT, ΣT, αT3, δT3, γT3, ΣT3, ΣTT3	9_95962596	0.98	3649869	3663010
ΣT3	5_61151590	5	61151590	Zm00001d014741	61156494	61157174	+			gene	protein_coding		-4904	ΣT3_1		4904	8.33902e-09	1			1.63464e-07	94	0.266765	NAM_JL_25	αT3, ΣT3	5_61111888	0.97	39702	44606
ΣT3	5_69578581	5	69578581	Zm00001d014950	69573089	69578098	+		Peptidase C78 ubiquitin fold modifier-specific peptidase 1/ 2	gene	protein_coding		5492			483	1.11996e-05	0.000871277	65	0.293639	1.89746e-07	95	0.269603	NAM_JL_25	αT3, ΣT3	5_61111888	0.97	8466693	8461201
ΣT3	9_102173877	9	102173877	Zm00001d046682	102206373	102207074	-		Peroxiredoxin-5	gene	protein_coding		-32496			32496	1.33915e-06	0.00960164	469	2.11872	2.46479e-07	96	0.272441	NAM_JL_45	αT, δT, γT, ΣT, αT3, δT3, γT3, ΣT3, ΣTT3	9_95962596	0.98	6211281	6243777
ΣT3	9_92242738	9	92242738	Zm00001d046491	92236061	92237994	-		Putative alcohol dehydrogenase superfamily protein	gene	protein_coding		6677	ΣT3_4		4744	1.24759e-07	0.161163	4512	20.3831	3.7644e-07	97	0.275279	NAM_JL_45	αT, δT, γT, ΣT, αT3, δT3, γT3, ΣT3, ΣTT3	9_95962596	0.98	3719858	3724602
ΣT3	9_27543340	9	27543340	Zm00001d045590	27537950	27546688	-		DExH-box ATP-dependent RNA helicase DExH9	gene	protein_coding		5390	ΣT3_3		within	4.14243e-08	0.497829	11970	54.0748	3.85572e-07	98	0.278117	NAM_JL_45	αT, δT, γT, ΣT, αT3, δT3, γT3, ΣT3, ΣTT3	9_95962596	0.98	68419256	68415908
ΣT3	9_34582585	9	34582585	Zm00001d045707	34556576	34571335	+			gene	protein_coding		26009	ΣT3_3		11250	2.44437e-08	1			4.52866e-07	99	0.280955	NAM_JL_45	αT, δT, γT, ΣT, αT3, δT3, γT3, ΣT3, ΣTT3	9_95962596	0.98	61380011	61391261
ΣT3	8_1659460	8	1659460	Zm00001d008221	1656468	1659625	+	cyclin5	cyclin5	gene	protein_coding		2992			within	2.05795e-07	0.130475	3768	17.022	4.94945e-07	100	0.283793					0
ΣT3	9_99533328	9	99533328	Zm00001d046625	99488946	99492927	+		Calcium-binding protein	gene	protein_coding		44382			40401	1.58181e-07	0.171575	4768	21.5396	4.99978e-07	101	0.286631	NAM_JL_45	αT, δT, γT, ΣT, αT3, δT3, γT3, ΣT3, ΣTT3	9_95962596	0.98	3570732	3526350
ΣT3	9_92703225	9	92703225	Zm00001d046500	92749456	92758500	-		SPX domain-containing protein 1	gene	protein_coding		-46231	ΣT3_4		46231	1.26672e-07	0.219764	5894	26.6263	5.12131e-07	102	0.289468	NAM_JL_45	αT, δT, γT, ΣT, αT3, δT3, γT3, ΣT3, ΣTT3	9_95962596	0.98	3259371	3204096
ΣT3	5_211410518	5	211410518	Zm00001d017986	211406416	211411375	-	E2F-DP-transcription factor 27	E2F transcription factor-like E2FE	gene	protein_coding		4102			within	0.00710176	4.0226e-06	3	0.0135526	5.24814e-07	103	0.292306					0
ΣT3	9_100656195	9	100656195	Zm00001d046654	100658071	100663167	+		Plant UBX domain-containing protein 4	gene	protein_coding		-1876			1876	4.95426e-07	0.0593088	1990	8.98988	5.38971e-07	104	0.295144	NAM_JL_45	αT, δT, γT, ΣT, αT3, δT3, γT3, ΣT3, ΣTT3	9_95962596	0.98	4693599	4695475
ΣT3	5_88033506	5	88033506	Zm00001d001594	88035959	88036351	+			ncRNA_gene	lincRNA		-2453	ΣT3_2		2453	3.12964e-08	1			5.72091e-07	105	0.297982	NAM_JL_26	δT, γT, ΣT, δT3, γT3, ΣT3, ΣTT3	5_86086930	0.85	1946576	1949029
ΣT3	5_88564678	5	88564678	Zm00001d015407	88561896	88565000	-	G2-like-transcription factor 53	Myb family transcription factor APL	gene	protein_coding		2782	ΣT3_2		within	6.22444e-08	0.557403	13135	59.3377	6.30643e-07	106	0.30082	NAM_JL_26	δT, γT, ΣT, δT3, γT3, ΣT3, ΣTT3	5_86086930	0.85	2477748	2474966
ΣT3	9_98056747	9	98056747	Zm00001d027143	98045825	98046397	+			ncRNA_gene	lincRNA		10922	ΣT3_4		10350	3.75837e-08	1			6.8014e-07	107	0.303658	NAM_JL_45	αT, δT, γT, ΣT, αT3, δT3, γT3, ΣT3, ΣTT3	9_95962596	0.98	2094151	2083229
ΣT3	9_90411411	9	90411411	Zm00001d046449	90421943	90425048	+	elongation factor 1-alpha9	elongation factor 1-alpha9	gene	protein_coding		-10532			10532	6.09114e-06	0.00696394	372	1.68052	7.62498e-07	108	0.306496	NAM_JL_45	αT, δT, γT, ΣT, αT3, δT3, γT3, ΣT3, ΣTT3	9_95962596	0.98	5551185	5537548
ΣT3	9_93918444	9	93918444	Zm00001d046525	93919377	93919450	+			ncRNA_gene	tRNA		-933	ΣT3_4		933	4.62742e-08	1			8.27784e-07	109	0.309334	NAM_JL_45	αT, δT, γT, ΣT, αT3, δT3, γT3, ΣT3, ΣTT3	9_95962596	0.98	2044152	2043146
ΣT3	5_83002680	5	83002680	Zm00001d015293	82992330	82999777	-		VIN3-like protein 2	gene	protein_coding		10350			2903	9.28505e-05	0.000503224	40	0.180701	8.35389e-07	110	0.312172					0
ΣT3	2_191440180	2	191440180	Zm00001d005874	191436169	191438639	-			gene	protein_coding		4011			1541	0.0172264	2.89027e-06	2	0.00903506	8.87015e-07	111	0.31501	NAM_JL_11	γT, ΣT, ΣTT3			0
ΣT3	9_72064395	9	72064395	Zm00001d046210	72063250	72066048	+		Beta-glucosidase 11	gene	protein_coding		1145			within	3.91629e-07	0.13527	3896	17.6003	9.40501e-07	112	0.317848	NAM_JL_45	αT, δT, γT, ΣT, αT3, δT3, γT3, ΣT3, ΣTT3	9_95962596	0.98	23898201	23896548
ΣT3	3_222084056	3	222084056	Zm00001d044216	222090042	222095901	+	bHLH-transcription factor 166	Transcription factor bHLH121	gene	protein_coding		-5986			5986	6.27915e-05	0.000869795	63	0.284604	9.67951e-07	113	0.320686					0
ΣT3	9_93856004	9	93856004	Zm00001d046524	93804102	93804983	+		Protein REDUCED WALL ACETYLATION 2	gene	protein_coding		51902	ΣT3_4		51021	5.71682e-08	1			1.01058e-06	114	0.323524	NAM_JL_45	αT, δT, γT, ΣT, αT3, δT3, γT3, ΣT3, ΣTT3	9_95962596	0.98	2106592	2157613
ΣT3	9_99587005	9	99587005	Zm00001d046626	99598556	99602330	+		Putative leucine-rich repat protein kinase family protein	gene	protein_coding		-11551	ΣT3_4		11551	6.21892e-08	1			1.0941e-06	115	0.326361	NAM_JL_45	αT, δT, γT, ΣT, αT3, δT3, γT3, ΣT3, ΣTT3	9_95962596	0.98	3624409	3635960
ΣT3	9_78857693	9	78857693	Zm00001d027124	78850769	78851312	+			ncRNA_gene	lincRNA		6924	ΣT3_4		6381	6.67765e-08	1			1.17005e-06	116	0.329199	NAM_JL_45	αT, δT, γT, ΣT, αT3, δT3, γT3, ΣT3, ΣTT3	9_95962596	0.98	17104903	17111284
ΣT3	9_79900289	9	79900289	Zm00001d046316	79893944	79894738	+		DUF1685 family protein	gene	protein_coding		6345	ΣT3_4		5551	7.26847e-08	1			1.26741e-06	117	0.332037	NAM_JL_45	αT, δT, γT, ΣT, αT3, δT3, γT3, ΣT3, ΣTT3	9_95962596	0.98	16062307	16067858
ΣT3	9_24649986	9	24649986	Zm00001d045500	24646435	24651266	-		ribosomal protein L29 family protein	gene	protein_coding		3551			within	7.42075e-05	0.000993375	75	0.338815	1.28435e-06	118	0.334875					0
ΣT3	9_93574796	9	93574796	Zm00001d046523	93565582	93565654	-			ncRNA_gene	tRNA		9214	ΣT3_4		9142	7.47896e-08	1			1.30198e-06	119	0.337713	NAM_JL_45	αT, δT, γT, ΣT, αT3, δT3, γT3, ΣT3, ΣTT3	9_95962596	0.98	2387800	2396942
ΣT3	9_93087490	9	93087490	Zm00001d046508	93066048	93070157	+	phospholipase D6	phospholipase D5	gene	protein_coding		21442			17333	2.68935e-07	0.298516	7682	34.7037	1.3919e-06	120	0.340551	NAM_JL_45	αT, δT, γT, ΣT, αT3, δT3, γT3, ΣT3, ΣTT3	9_95962596	0.98	2875106	2892439
ΣT3	5_85948548	5	85948548	Zm00001d015354	85946140	85946524	+		Auxin-responsive protein SAUR71	gene	protein_coding		2408	ΣT3_2		2024	8.08324e-08	1			1.4009e-06	121	0.343389	NAM_JL_26	δT, γT, ΣT, δT3, γT3, ΣT3, ΣTT3	5_86086930	0.85	138382	140406
ΣT3	9_30403086	9	30403086	Zm00001d045640	30396772	30402560	-		HVA22-like protein a	gene	protein_coding		6314	ΣT3_3		526	8.65003e-08	1			1.49326e-06	122	0.346227	NAM_JL_45	αT, δT, γT, ΣT, αT3, δT3, γT3, ΣT3, ΣTT3	9_95962596	0.98	65559510	65560036
ΣT3	9_42416539	9	42416539	Zm00001d045833	42386300	42387215	-			gene	protein_coding		30239			29324	6.92651e-07	0.132183	3815	17.2344	1.57535e-06	123	0.349065	NAM_JL_45	αT, δT, γT, ΣT, αT3, δT3, γT3, ΣT3, ΣTT3	9_95962596	0.98	53546057	53575381
ΣT3	9_100629760	9	100629760	Zm00001d046652	100613423	100616851	+		F11F12.5 protein	gene	protein_coding		16337			12909	1.44191e-07	0.648066	15002	67.772	1.60594e-06	124	0.351903	NAM_JL_45	αT, δT, γT, ΣT, αT3, δT3, γT3, ΣT3, ΣTT3	9_95962596	0.98	4667164	4650827
ΣT3	9_25192793	9	25192793	Zm00001d045517	25249729	25252528	-		RING/U-box superfamily protein	gene	protein_coding		-56936	ΣT3_3		56936	9.91714e-08	0.961779	21374	96.5576	1.63725e-06	125	0.354741					0
ΣT3	5_87279455	5	87279455	Zm00001d015380	87277184	87278351	+			gene	protein_coding		2271	ΣT3_2		1104	9.59509e-08	1			1.64646e-06	126	0.357579	NAM_JL_26	δT, γT, ΣT, δT3, γT3, ΣT3, ΣTT3	5_86086930	0.85	1192525	1190254
ΣT3	9_31763045	9	31763045	Zm00001d045660	31624631	31625506	-		3-ketoacyl-CoA synthase	gene	protein_coding		138414	ΣT3_3		137539	9.60118e-08	1			1.64745e-06	127	0.360417	NAM_JL_45	αT, δT, γT, ΣT, αT3, δT3, γT3, ΣT3, ΣTT3	9_95962596	0.98	64199551	64337090
ΣT3	9_30002843	9	30002843	Zm00001d045635	30190972	30217757	+		Helicase protein MOM1	gene	protein_coding		-188129	ΣT3_3		188129	1.21274e-07	0.823583	18557	83.8318	1.70986e-06	128	0.363255	NAM_JL_45	αT, δT, γT, ΣT, αT3, δT3, γT3, ΣT3, ΣTT3	9_95962596	0.98	65959753	65744839
ΣT3	9_92853893	9	92853893	Zm00001d046501	92852327	92853497	-		Ethylene-responsive transcription factor WIN1	gene	protein_coding		1566	ΣT3_4		396	1.03946e-07	1			1.77534e-06	129	0.366092	NAM_JL_45	αT, δT, γT, ΣT, αT3, δT3, γT3, ΣT3, ΣTT3	9_95962596	0.98	3108703	3109099
ΣT3	9_29909023	9	29909023	Zm00001d045633	29760618	29761802	+		Putative SNF1-related protein kinase family protein	gene	protein_coding		148405	ΣT3_3		147221	1.04596e-07	1			1.78579e-06	130	0.36893	NAM_JL_45	αT, δT, γT, ΣT, αT3, δT3, γT3, ΣT3, ΣTT3	9_95962596	0.98	66053573	66200794
ΣT3	9_94031662	9	94031662	Zm00001d046526	94029353	94031428	-		F-box protein SKIP19	gene	protein_coding		2309	ΣT3_4		234	1.10442e-07	1			1.87959e-06	131	0.371768	NAM_JL_45	αT, δT, γT, ΣT, αT3, δT3, γT3, ΣT3, ΣTT3	9_95962596	0.98	1930934	1931168
ΣT3	9_92961410	9	92961410	Zm00001d046506	92956668	92968289	+		Serine/threonine-protein phosphatase 2A 65 kDa regulatory subunit A beta isoform	gene	protein_coding		4742			within	2.3877e-07	0.474241	11482	51.8703	1.92428e-06	132	0.374606	NAM_JL_45	αT, δT, γT, ΣT, αT3, δT3, γT3, ΣT3, ΣTT3	9_95962596	0.98	3001186	2994307
ΣT3	5_85123015	5	85123015	Zm00001d015338	85119954	85121228	+		OSJNBa0058K23.8 protein%3B protein	gene	protein_coding		3061			1787	2.07575e-07	0.576027	13520	61.077	2.02542e-06	133	0.377444	NAM_JL_26	δT, γT, ΣT, δT3, γT3, ΣT3, ΣTT3	5_86086930	0.85	963915	965702
ΣT3	9_92522455	9	92522455	Zm00001d046499	92565565	92566347	-		DNA binding%3BDNA-directed RNA polymerases	gene	protein_coding		-43110			43110	1.74253e-07	0.739143	16865	76.1881	2.17218e-06	134	0.380282	NAM_JL_45	αT, δT, γT, ΣT, αT3, δT3, γT3, ΣT3, ΣTT3	9_95962596	0.98	3440141	3396249
ΣT3	9_27985194	9	27985194	Zm00001d045596	28028596	28031674	+		IQ calmodulin-binding motif family protein	gene	protein_coding		-43402			43402	4.75432e-05	0.0027745	177	0.799602	2.2215e-06	135	0.38312	NAM_JL_45	αT, δT, γT, ΣT, αT3, δT3, γT3, ΣT3, ΣTT3	9_95962596	0.98	67977402	67930922
ΣT3	9_101487808	9	101487808	Zm00001d046669	101482776	101483228	-			gene	protein_coding		5032	ΣT3_4		4580	1.36147e-07	1			2.28857e-06	136	0.385958	NAM_JL_45	αT, δT, γT, ΣT, αT3, δT3, γT3, ΣT3, ΣTT3	9_95962596	0.98	5525212	5520180
ΣT3	5_72252365	5	72252365	Zm00001d015015	72249115	72253729	-		ENTH/VHS/GAT family protein	gene	protein_coding		3250			within	1.3745e-07	1			2.30917e-06	137	0.388796	NAM_JL_25	αT3, ΣT3	5_61111888	0.97	11140477	11137227
ΣT3	9_30959684	9	30959684	Zm00001d045649	30986811	30987830	+		Ribonucleoside-diphosphate reductase small chain	gene	protein_coding		-27127			27127	3.99601e-07	0.35416	8904	40.2241	2.37345e-06	138	0.391634	NAM_JL_45	αT, δT, γT, ΣT, αT3, δT3, γT3, ΣT3, ΣTT3	9_95962596	0.98	65002912	64974766
ΣT3	10_134459224	10	134459224	Zm00001d025946	134457486	134477101	+		Serine/threonine-protein kinase GRIK1	gene	protein_coding		1738			within	0.000438195	0.000323489	24	0.108421	2.37706e-06	139	0.394472					0
ΣT3	9_88170937	9	88170937	Zm00001d046416	88220986	88223951	+		Putative cytochrome P450 superfamily protein	gene	protein_coding		-50049			50049	1.51861e-07	1			2.53612e-06	140	0.39731	NAM_JL_45	αT, δT, γT, ΣT, αT3, δT3, γT3, ΣT3, ΣTT3	9_95962596	0.98	7791659	7738645
ΣT3	5_206007707	5	206007707	Zm00001d017756	206004272	206007539	-		Syntaxin-22	gene	protein_coding		3435			168	1.99503e-06	0.0786526	2504	11.3119	2.61538e-06	141	0.400148	NAM_JL_28	αT, γT, αT3, γT3			0
ΣT3	9_31119155	9	31119155	Zm00001d045651	31123468	31123860	-			gene	protein_coding		-4313			4313	2.39653e-07	0.668511	15412	69.6241	2.66699e-06	142	0.402985	NAM_JL_45	αT, δT, γT, ΣT, αT3, δT3, γT3, ΣT3, ΣTT3	9_95962596	0.98	64843441	64838736
ΣT3	9_29101379	9	29101379	Zm00001d045624	29081946	29100427	+			gene	protein_coding		19433			952	1.68713e-07	1			2.7998e-06	143	0.405823	NAM_JL_45	αT, δT, γT, ΣT, αT3, δT3, γT3, ΣT3, ΣTT3	9_95962596	0.98	66861217	66862169
ΣT3	8_955916	8	955916	Zm00001d008198	957005	966468	+	MYB-related-transcription factor 2	Putative MYB DNA-binding domain superfamily protein	gene	protein_coding		-1089			1089	2.84956e-06	0.0615065	2056	9.28804	2.90188e-06	144	0.408661					0
ΣT3	9_91998250	9	91998250	Zm00001d046485	92004665	92008946	+		Putative leucine-rich repeat receptor protein kinase family protein	gene	protein_coding		-6415			6415	1.5635e-05	0.0113181	529	2.38977	2.9282e-06	145	0.411499	NAM_JL_45	αT, δT, γT, ΣT, αT3, δT3, γT3, ΣT3, ΣTT3	9_95962596	0.98	3964346	3953650
ΣT3	9_34736189	9	34736189	Zm00001d045711	34739030	34740154	+		Senescence-specific cysteine protease SAG12	gene	protein_coding		-2841			2841	1.77593e-07	1			2.93805e-06	146	0.414337	NAM_JL_45	αT, δT, γT, ΣT, αT3, δT3, γT3, ΣT3, ΣTT3	9_95962596	0.98	61226407	61222442
ΣT3	9_92922921	9	92922921	Zm00001d046505	92932044	92932852	+			gene	protein_coding		-9123			9123	2.09752e-07	1			3.43518e-06	147	0.417175	NAM_JL_45	αT, δT, γT, ΣT, αT3, δT3, γT3, ΣT3, ΣTT3	9_95962596	0.98	3039675	3029744
ΣT3	9_77256996	9	77256996	Zm00001d046263	77253429	77264289	-		Amino acid permease 6	gene	protein_coding		3567			within	2.82173e-07	0.785781	17814	80.4752	3.61898e-06	148	0.420013	NAM_JL_45	αT, δT, γT, ΣT, αT3, δT3, γT3, ΣT3, ΣTT3	9_95962596	0.98	18705600	18698307
ΣT3	9_24788239	9	24788239	Zm00001d045503	24756980	24761831	-		Probable prolyl 4-hydroxylase 3	gene	protein_coding		31259			26408	7.39184e-07	0.307905	7916	35.7608	3.70887e-06	149	0.422851					0
ΣT3	9_77875599	9	77875599	Zm00001d046279	77860752	77862165	-		CCAAT-binding factor	gene	protein_coding		14847			13434	2.27682e-07	1			3.71015e-06	150	0.425689	NAM_JL_45	αT, δT, γT, ΣT, αT3, δT3, γT3, ΣT3, ΣTT3	9_95962596	0.98	18086997	18100431
ΣT3	5_81752067	5	81752067	Zm00001d015259	81752266	81766811	+		26S proteasome non-ATPase regulatory subunit 2 homolog A	gene	protein_coding		-199			199	0.000271314	0.000870089	64	0.289122	3.83826e-06	151	0.428527					0
ΣT3	9_92961410	9	92961410	Zm00001d046507	92964758	92964829	-			ncRNA_gene	tRNA		-3348			3348	2.3877e-07	1			3.87948e-06	152	0.431365	NAM_JL_45	αT, δT, γT, ΣT, αT3, δT3, γT3, ΣT3, ΣTT3	9_95962596	0.98	3001186	2997767
ΣT3	9_101225934	9	101225934	Zm00001d046665	101213443	101215182	+		Phytosulfokines 1	gene	protein_coding		12491			10752	1.7337e-05	0.014314	626	2.82797	4.02251e-06	153	0.434203	NAM_JL_45	αT, δT, γT, ΣT, αT3, δT3, γT3, ΣT3, ΣTT3	9_95962596	0.98	5263338	5250847
ΣT3	9_78415949	9	78415949	Zm00001d046289	78457352	78458110	-		Putative SWIM zinc finger family protein	gene	protein_coding		-41403			41403	1.70925e-05	0.014922	645	2.91381	4.12723e-06	154	0.437041	NAM_JL_45	αT, δT, γT, ΣT, αT3, δT3, γT3, ΣT3, ΣTT3	9_95962596	0.98	17546647	17504486
ΣT3	4_148983219	4	148983219	Zm00001d051219	148978271	148980970	-		RNI-like superfamily protein	gene	protein_coding		4948			2249	0.00237161	0.000128848	12	0.0542103	4.88955e-06	155	0.439879	NAM_JL_21	δT, γT, ΣT, αT3, δT3, γT3, ΣT3, ΣTT3	4_44001550	0.09	104981669	104976721
ΣT3	9_26034808	9	26034808	Zm00001d045545	25957575	25959896	+			gene	protein_coding		77233			74912	3.07331e-07	1			4.91586e-06	156	0.442716					0
ΣT3	9_28651680	9	28651680	Zm00001d045607	28663249	28667205	+		Nucleic acid-binding OB-fold-like protein	gene	protein_coding		-11569			11569	1.4592e-06	0.211578	5722	25.8493	4.93692e-06	157	0.445554	NAM_JL_45	αT, δT, γT, ΣT, αT3, δT3, γT3, ΣT3, ΣTT3	9_95962596	0.98	67310916	67295391
ΣT3	1_200282708	1	200282708	Zm00001d031737	200260170	200262141	-		NC domain-containing protein-related	gene	protein_coding		22538			20567	0.000771394	0.000402355	30	0.135526	4.96148e-06	158	0.448392					0
ΣT3	5_86888183	5	86888183	ENSRNA049455662	86952457	86952612	-	MIR444	microRNA MIR444	ncRNA_gene	pre_miRNA		-64274			64274	3.1184e-07	1			4.98344e-06	159	0.45123	NAM_JL_26	δT, γT, ΣT, δT3, γT3, ΣT3, ΣTT3	5_86086930	0.85	801253	865527
ΣT3	5_86326633	5	86326633	Zm00001d015364	86325771	86329365	-		Cysteine-type peptidase	gene	protein_coding		862			within	1.647e-06	0.191687	5248	23.708	5.04138e-06	160	0.454068	NAM_JL_26	δT, γT, ΣT, δT3, γT3, ΣT3, ΣTT3	5_86086930	0.85	239703	238841
ΣT3	9_25700726	9	25700726	Zm00001d045533	25739313	25742304	+		Growth-regulating factor 6	gene	protein_coding		-38587			38587	2.21969e-06	0.144327	4112	18.5761	5.11098e-06	161	0.456906					0
ΣT3	9_86249269	9	86249269	Zm00001d046383	86006967	86015173	-		Protein NRT1/ PTR FAMILY 4.6	gene	protein_coding		242302			234096	4.14489e-07	0.787495	17851	80.6424	5.20135e-06	162	0.459744	NAM_JL_45	αT, δT, γT, ΣT, αT3, δT3, γT3, ΣT3, ΣTT3	9_95962596	0.98	9713327	9947423
ΣT3	9_30227955	9	30227955	Zm00001d045636	30233033	30234250	+		Zinc finger protein CONSTANS-LIKE 12	gene	protein_coding		-5078			5078	3.32931e-07	1			5.29871e-06	163	0.462582	NAM_JL_45	αT, δT, γT, ΣT, αT3, δT3, γT3, ΣT3, ΣTT3	9_95962596	0.98	65734641	65728346
ΣT3	1_57397163	1	57397163	Zm00001d029083	57394910	57397707	+		alanine--glyoxylate aminotransferase1	gene	protein_coding		2253			within	0.000415929	0.000800651	59	0.266534	5.29994e-06	164	0.46542					0
ΣT3	3_209126543	3	209126543	Zm00001d043757	209128726	209130078	+		Nuclear pore complex protein NUP50A	gene	protein_coding		-2183			2183	1.9546e-06	0.175891	4863	21.9687	5.46059e-06	165	0.468258	NAM_JL_18	αT, γT, ΣT, δT3			0
ΣT3	5_88359397	5	88359397	Zm00001d015399	88372291	88376274	+		Choline-phosphate cytidylyltransferase 2	gene	protein_coding		-12894			12894	1.9971e-05	0.0177054	742	3.35201	5.60628e-06	166	0.471096	NAM_JL_26	δT, γT, ΣT, δT3, γT3, ΣT3, ΣTT3	5_86086930	0.85	2272467	2285361
ΣT3	9_98274782	9	98274782	Zm00001d046602	98269122	98272411	+		CUE domain containing protein	gene	protein_coding		5660			2371	8.38391e-07	0.422113	10381	46.8965	5.61075e-06	167	0.473934	NAM_JL_45	αT, δT, γT, ΣT, αT3, δT3, γT3, ΣT3, ΣTT3	9_95962596	0.98	2312186	2306526
ΣT3	5_69612089	5	69612089	Zm00001d014951	69611597	69615673	+		TMPIT-like protein	gene	protein_coding		492			within	2.33824e-05	0.0153267	661	2.98609	5.67728e-06	168	0.476772	NAM_JL_25	αT3, ΣT3	5_61111888	0.97	8500201	8499709
ΣT3	5_61119866	5	61119866	Zm00001d014738	61120160	61120841	+		Phototropic-responsive NPH3 family protein	gene	protein_coding		-294			294	3.58596e-07	1			5.68054e-06	169	0.47961	NAM_JL_25	αT3, ΣT3	5_61111888	0.97	7978	8272
ΣT3	9_86443557	9	86443557	Zm00001d046385	86533090	86547022	+			gene	protein_coding		-89533			89533	1.20938e-06	0.315293	8088	36.5378	6.0169e-06	170	0.482447	NAM_JL_45	αT, δT, γT, ΣT, αT3, δT3, γT3, ΣT3, ΣTT3	9_95962596	0.98	9519039	9415574
ΣT3	9_34768719	9	34768719	Zm00001d045712	34740566	34742327	+		Ananain	gene	protein_coding		28153			26392	3.89083e-07	1			6.13174e-06	171	0.485285	NAM_JL_45	αT, δT, γT, ΣT, αT3, δT3, γT3, ΣT3, ΣTT3	9_95962596	0.98	61193877	61220269
ΣT3	5_86716823	5	86716823	Zm00001d015372	86733894	86746224	-		CONTAINS InterPro DOMAIN/s: Ribonuclease H2 subunit C (InterPro:IPR013924)%3B Has 30201 Blast hits to 17322 proteins in 780 species: Archae - 12%3B Bacteria - 1396%3B Metazoa - 17338%3B Fungi - 3422%3B Plants - 5037%3B Viruses - 0%3B Other Eukaryotes - 2996 (sou /.../CBI BLink).	gene	protein_coding		-17071			17071	1.40025e-06	0.284482	7369	33.2897	6.26834e-06	172	0.488123	NAM_JL_26	δT, γT, ΣT, δT3, γT3, ΣT3, ΣTT3	5_86086930	0.85	629893	646964
ΣT3	9_77062882	9	77062882	Zm00001d046260	77047294	77053291	+		NADH dehydrogenase subunit 7	gene	protein_coding		15588			9591	4.00017e-07	1			6.29297e-06	173	0.490961	NAM_JL_45	αT, δT, γT, ΣT, αT3, δT3, γT3, ΣT3, ΣTT3	9_95962596	0.98	18899714	18909305
ΣT3	9_92349984	9	92349984	Zm00001d046493	92349534	92350909	-	heme oxygenase3	heme oxygenase3	gene	protein_coding		450			within	4.11994e-07	1			6.46923e-06	174	0.493799	NAM_JL_45	αT, δT, γT, ΣT, αT3, δT3, γT3, ΣT3, ΣTT3	9_95962596	0.98	3612612	3611687
ΣT3	9_29394010	9	29394010	Zm00001d045630	29283539	29285959	-		Retrovirus-related Pol polyprotein LINE-1	gene	protein_coding		110471			108051	4.37075e-07	1			6.83723e-06	175	0.496637	NAM_JL_45	αT, δT, γT, ΣT, αT3, δT3, γT3, ΣT3, ΣTT3	9_95962596	0.98	66568586	66676637
ΣT3	9_34584353	9	34584353	Zm00001d045708	34597188	34598313	-		Senescence-specific cysteine protease SAG12	gene	protein_coding		-12835			12835	4.5026e-07	1			7.03011e-06	176	0.499475	NAM_JL_45	αT, δT, γT, ΣT, αT3, δT3, γT3, ΣT3, ΣTT3	9_95962596	0.98	61378243	61364283
ΣTT3	5_25434949	5	25434949	Zm00001d013937	25431430	25434346	-	GRMZM2G073351	Protochlorophyllide reductase C chloroplastic	gene	protein_coding	Yes	3519	ΣTT3_25		603	1.1384e-14	4.13277e-06	2	0.00903506	2.1408e-18	1	0.00283583	NAM_JL_24	αT, δT, γT, ΣT, δT3, γT3, ΣTT3	5_25435977	0.36	1028	1631
ΣTT3	5_25518275	5	25518275	Zm00001d013940	25518163	25523534	+		Nucleolar complex protein 2 homolog	gene	protein_coding		112	ΣTT3_25		within	2.81218e-13	0.0695812	1856	8.38453	6.37212e-13	2	0.00567167	NAM_JL_24	αT, δT, γT, ΣT, δT3, γT3, ΣTT3	5_25435977	0.36	82298	82186
ΣTT3	1_231124446	1	231124446	Zm00001d032576	231120510	231123615	-	GRMZM2G036455	Protochlorophyllide reductase C chloroplastic	gene	protein_coding	Yes	3936	ΣTT3_5		831	8.34132e-08	2.20749e-06	1	0.00451753	5.5835e-12	3	0.0085075	NAM_JL_5	αT, δT, γT, ΣT, δT3, γT3, ΣTT3	1_231643164	0.67	518718	519549
ΣTT3	1_230674409	1	230674409	Zm00001d032566	230666267	230672973	-			gene	protein_coding		8142	ΣTT3_5		1436	2.1542e-07	1.11659e-05	4	0.0180701	6.67563e-11	4	0.0113433	NAM_JL_5	αT, δT, γT, ΣT, δT3, γT3, ΣTT3	1_231643164	0.67	968755	970191
ΣTT3	5_25179181	5	25179181	Zm00001d013933	25177803	25179923	-		CBS domain-containing protein CBSX5	gene	protein_coding		1378	ΣTT3_25		within	2.69776e-08	0.000143184	12	0.0542103	1.05374e-10	5	0.0141792	NAM_JL_24	αT, δT, γT, ΣT, δT3, γT3, ΣTT3	5_25435977	0.36	256796	256054
ΣTT3	5_25535064	5	25535064	Zm00001d013941	25536275	25537969	+		Pentatricopeptide repeat-containing protein chloroplastic	gene	protein_coding		-1211	ΣTT3_25		1211	5.80514e-11	1			1.42631e-09	6	0.017015	NAM_JL_24	αT, δT, γT, ΣT, δT3, γT3, ΣTT3	5_25435977	0.36	99087	100298
ΣTT3	5_25545001	5	25545001	Zm00001d013944	25544795	25545626	+			gene	protein_coding		206	ΣTT3_25		within	9.68579e-11	1			2.33019e-09	7	0.0198508	NAM_JL_24	αT, δT, γT, ΣT, δT3, γT3, ΣTT3	5_25435977	0.36	109024	108818
ΣTT3	5_25542081	5	25542081	Zm00001d013943	25539709	25540838	-		FIP1	gene	protein_coding		2372	ΣTT3_25		1243	1.5397e-10	0.806785	18098	81.7582	2.95756e-09	8	0.0226867	NAM_JL_24	αT, δT, γT, ΣT, δT3, γT3, ΣTT3	5_25435977	0.36	106104	103732
ΣTT3	5_25227933	5	25227933	Zm00001d013935	25228457	25241728	-		WAPL (Wings apart-like protein regulation of heterochromatin) protein	gene	protein_coding		-524	ΣTT3_25		524	6.88772e-09	0.684027	15516	70.094	9.50442e-08	9	0.0255225	NAM_JL_24	αT, δT, γT, ΣT, δT3, γT3, ΣTT3	5_25435977	0.36	208044	194249
ΣTT3	5_25009608	5	25009608	Zm00001d013927	25004008	25010095	-		Monothiol glutaredoxin-S17	gene	protein_coding		5600	ΣTT3_25		within	2.33102e-07	0.0220838	655	2.95898	1.03392e-07	10	0.0283583	NAM_JL_24	αT, δT, γT, ΣT, δT3, γT3, ΣTT3	5_25435977	0.36	426369	425882
ΣTT3	5_26134678	5	26134678	Zm00001d013956	26132024	26133292	+	tonoplast intrinsic protein3	tonoplast intrinsic protein3	gene	protein_coding		2654	ΣTT3_25		1386	3.94831e-08	0.139086	3453	15.599	1.09941e-07	11	0.0311942	NAM_JL_24	αT, δT, γT, ΣT, δT3, γT3, ΣTT3	5_25435977	0.36	698701	696047
ΣTT3	1_231045647	1	231045647	Zm00001d032575	231049610	231065263	-		WAPL (Wings apart-like protein regulation of heterochromatin) protein	gene	protein_coding		-3963	ΣTT3_5		3963	8.29338e-08	0.0872314	2288	10.3361	1.4284e-07	12	0.03403	NAM_JL_5	αT, δT, γT, ΣT, δT3, γT3, ΣTT3	1_231643164	0.67	597517	577901
ΣTT3	5_27867378	5	27867378	Zm00001d013996	27841955	27848005	-		Syntaxin-41	gene	protein_coding		25423	ΣTT3_25		19373	2.90807e-06	0.00262658	97	0.4382	1.50398e-07	13	0.0368658	NAM_JL_24	αT, δT, γT, ΣT, δT3, γT3, ΣTT3	5_25435977	0.36	2431401	2405978
ΣTT3	1_231458031	1	231458031	Zm00001d032591	231449534	231455154	+		Endosomal targeting BRO1-like domain-containing protein	gene	protein_coding		8497	ΣTT3_5		2877	3.32104e-07	0.0256815	769	3.47398	1.66994e-07	14	0.0397017	NAM_JL_5	αT, δT, γT, ΣT, δT3, γT3, ΣTT3	1_231643164	0.67	185133	188010
ΣTT3	5_26160680	5	26160680	Zm00001d013957	26165521	26170988	-		Ser/Thr protein phosphatase family	gene	protein_coding		-4841	ΣTT3_25		4841	3.9083e-08	0.424345	9808	44.3079	3.13695e-07	15	0.0425375	NAM_JL_24	αT, δT, γT, ΣT, δT3, γT3, ΣTT3	5_25435977	0.36	724703	729544
ΣTT3	5_30419814	5	30419814	Zm00001d014043	30420457	30425053	-		PPPDE peptidase domain-containing protein 2	gene	protein_coding		-643	ΣTT3_25		643	5.36351e-06	0.00373651	133	0.600831	3.75274e-07	16	0.0453733	NAM_JL_24	αT, δT, γT, ΣT, δT3, γT3, ΣTT3	5_25435977	0.36	4983837	4984480
ΣTT3	1_230958704	1	230958704	Zm00001d032572	230960883	230963337	-		LanC-like protein 2	gene	protein_coding		-2179	ΣTT3_5		2179	1.40169e-07	0.145739	3603	16.2767	3.82135e-07	17	0.0482092	NAM_JL_5	αT, δT, γT, ΣT, δT3, γT3, ΣTT3	1_231643164	0.67	684460	679827
ΣTT3	5_25623074	5	25623074	Zm00001d013947	25632561	25633358	-		NHL25	gene	protein_coding		-9487	ΣTT3_25		9487	2.78292e-08	1			5.11979e-07	18	0.051045	NAM_JL_24	αT, δT, γT, ΣT, δT3, γT3, ΣTT3	5_25435977	0.36	187097	196584
ΣTT3	5_30083040	5	30083040	Zm00001d014037	30097117	30113105	-		Serine/threonine protein phosphatase 2A regulatory subunit B''alpha	gene	protein_coding		-14077	ΣTT3_25		14077	6.87052e-06	0.00448332	151	0.682147	5.63557e-07	19	0.0538808	NAM_JL_24	αT, δT, γT, ΣT, δT3, γT3, ΣTT3	5_25435977	0.36	4647063	4661140
ΣTT3	5_25188756	5	25188756	Zm00001d013934	25185480	25187200	-		soluble epoxide hydrolase	gene	protein_coding		3276	ΣTT3_25		1556	3.79047e-08	0.95615	21223	95.8755	6.57188e-07	20	0.0567167	NAM_JL_24	αT, δT, γT, ΣT, δT3, γT3, ΣTT3	5_25435977	0.36	247221	248777
ΣTT3	1_255827669	1	255827669	Zm00001d033246	255864303	255869980	+	Homeobox-transcription factor 124	Homeobox-leucine zipper protein ATHB-14	gene	protein_coding		-36634	ΣTT3_6		36634	1.59839e-06	0.0228222	689	3.11258	6.61232e-07	21	0.0595525					0
ΣTT3	1_230853549	1	230853549	Zm00001d032570	230853577	230855383	-		soluble epoxide hydrolase	gene	protein_coding		-28	ΣTT3_5		28	4.72705e-07	0.0956449	2485	11.2261	8.09829e-07	22	0.0623883	NAM_JL_5	αT, δT, γT, ΣT, δT3, γT3, ΣTT3	1_231643164	0.67	789615	787781
ΣTT3	5_27877049	5	27877049	Zm00001d013997	27905856	27909377	-		Cysteine-rich receptor-like protein kinase 2	gene	protein_coding		-28807	ΣTT3_25		28807	1.63737e-06	0.0334401	967	4.36845	9.7026e-07	23	0.0652242	NAM_JL_24	αT, δT, γT, ΣT, δT3, γT3, ΣTT3	5_25435977	0.36	2441072	2469879
ΣTT3	1_230816005	1	230816005	Zm00001d032569	230852598	230853237	-		Ras-related protein RABA6a	gene	protein_coding		-36593	ΣTT3_5		36593	5.90396e-08	1			1.04176e-06	24	0.06806	NAM_JL_5	αT, δT, γT, ΣT, δT3, γT3, ΣTT3	1_231643164	0.67	827159	789927
ΣTT3	1_230565547	1	230565547	Zm00001d032562	230560853	230563661	-		evolutionarily conserved C-terminal region 2	gene	protein_coding		4694	ΣTT3_5		1886	6.98558e-08	0.849685	18979	85.7382	1.04701e-06	25	0.0708958	NAM_JL_5	αT, δT, γT, ΣT, δT3, γT3, ΣTT3	1_231643164	0.67	1077617	1079503
ΣTT3	5_25547183	5	25547183	Zm00001d013945	25546118	25546714	-		Ripening-related protein 3	gene	protein_coding		1065	ΣTT3_25		469	7.12938e-08	1			1.24454e-06	26	0.0737317	NAM_JL_24	αT, δT, γT, ΣT, δT3, γT3, ΣTT3	5_25435977	0.36	111206	110141
ΣTT3	1_230815209	1	230815209	Zm00001d032568	230778341	230778667	-		HR-like lesion-inducing protein-related	gene	protein_coding		36868	ΣTT3_5		36542	1.08153e-07	1			1.8429e-06	27	0.0765675	NAM_JL_5	αT, δT, γT, ΣT, δT3, γT3, ΣTT3	1_231643164	0.67	827955	864497
ΣTT3	5_24944681	5	24944681	Zm00001d013923	24943241	24945641	+		Pentatricopeptide repeat-containing protein mitochondrial	gene	protein_coding		1440	ΣTT3_25		within	4.12093e-07	0.274404	6533	29.513	1.92181e-06	28	0.0794033	NAM_JL_24	αT, δT, γT, ΣT, δT3, γT3, ΣTT3	5_25435977	0.36	491296	490336
ΣTT3	5_86085552	5	86085552	Zm00001d015356	86084655	86086755	-	4-hydroxyphenylpyruvate dioxygenase 1	4-hydroxyphenylpyruvate dioxygenase 1	gene	protein_coding	Yes	897			within	5.21993e-06	0.0247945	739	3.33845	2.18213e-06	29	0.0822392	NAM_JL_26	δT, γT, ΣT, δT3, γT3, ΣT3, ΣTT3	5_93326739	0.57	7241187	7239984
ΣTT3	1_230539545	1	230539545	Zm00001d022934	230537327	230539727	+			ncRNA_gene	lincRNA		2218	ΣTT3_5		within	1.66562e-07	1			2.76624e-06	30	0.085075	NAM_JL_5	αT, δT, γT, ΣT, δT3, γT3, ΣTT3	1_231643164	0.67	1103619	1103437
ΣTT3	1_230539545	1	230539545	Zm00001d022933	230537327	230537769	+			ncRNA_gene	lincRNA		2218	ΣTT3_5		1776	1.66562e-07	1			2.76624e-06	31	0.0879108	NAM_JL_5	αT, δT, γT, ΣT, δT3, γT3, ΣTT3	1_231643164	0.67	1103619	1105395
ΣTT3	1_231351726	1	231351726	Zm00001d032587	231348416	231372317	+		DNA-directed RNA polymerase I subunit 2	gene	protein_coding		3310	ΣTT3_5		within	5.33028e-07	0.355406	8331	37.6355	3.12184e-06	32	0.0907467	NAM_JL_5	αT, δT, γT, ΣT, δT3, γT3, ΣTT3	1_231643164	0.67	291438	270847
ΣTT3	5_30294740	5	30294740	Zm00001d014039	30288982	30292232	-		non-intrinsic ABC protein 4	gene	protein_coding		5758	ΣTT3_25		2508	1.38838e-05	0.017167	521	2.35363	3.87296e-06	33	0.0935825	NAM_JL_24	αT, δT, γT, ΣT, δT3, γT3, ΣTT3	5_25435977	0.36	4858763	4853005
ΣTT3	4_242400524	4	242400524	Zm00001d053860	242400871	242404592	-		MEI2 C-terminal RRM only like 1	gene	protein_coding		-347			347	0.00224684	0.00011908	10	0.0451753	4.31669e-06	34	0.0964183					0
ΣTT3	8_13146021	8	13146021	Zm00001d008567	13146141	13153362	+	glucose translocator1	glucose translocator1	gene	protein_coding		-120	ΣTT3_36		120	7.93269e-06	0.0354898	1021	4.6124	4.52784e-06	35	0.0992542					0
ΣTT3	4_148899179	4	148899179	Zm00001d051214	148918694	148925044	+	nitrilase2	nitrilase2	gene	protein_coding		-19515			19515	0.00011174	0.00292593	103	0.465305	5.20933e-06	36	0.10209	NAM_JL_21	δT, γT, ΣT, αT3, δT3, γT3, ΣT3, ΣTT3	4_43284283	0.57	105614896	105634411
ΣTT3	5_25112000	5	25112000	Zm00001d013931	25111416	25112574	+	MYB-transcription factor 102	Transcription factor MYB36	gene	protein_coding		584	ΣTT3_25		within	3.28794e-07	1			5.23697e-06	37	0.104926	NAM_JL_24	αT, δT, γT, ΣT, δT3, γT3, ΣTT3	5_25435977	0.36	323977	323403
ΣTT3	10_80403659	10	80403659	Zm00001d024619	80408875	80409683	+			gene	protein_coding		-5216	ΣTT3_44		5216	1.11635e-05	0.0307752	894	4.03867	5.45704e-06	38	0.107762					0
ΣTT3	9_38925055	9	38925055	Zm00001d045784	38914713	38917486	+		RPM1-interacting protein 4 (RIN4) family protein	gene	protein_coding		10342			7569	7.04662e-05	0.00492382	164	0.740875	5.50771e-06	39	0.110598	NAM_JL_45	αT, δT, γT, ΣT, αT3, δT3, γT3, ΣT3, ΣTT3	9_94142626	0.18	55217571	55225140
ΣTT3	5_196289043	5	196289043	Zm00001d017453	196268325	196271143	+		Putative glycerol-3-phosphate transporter 4	gene	protein_coding		20718	ΣTT3_28		17900	2.86506e-06	0.122587	3094	13.9772	5.57101e-06	40	0.113433	NAM_JL_27	δT			0
ΣTT3	5_88616183	5	88616183	Zm00001d015407	88561896	88565000	-	G2-like-transcription factor 53	Myb family transcription factor APL	gene	protein_coding		54287	ΣTT3_26		51183	4.83022e-07	0.737385	16629	75.122	5.64458e-06	41	0.116269	NAM_JL_26	δT, γT, ΣT, δT3, γT3, ΣT3, ΣTT3	5_93326739	0.57	4710556	4761739
ΣTT3	5_90068035	5	90068035	Zm00001d015435	90052984	90074741	-		Protein STRUBBELIG-RECEPTOR FAMILY 1	gene	protein_coding		15051			within	8.23588e-05	0.00459048	156	0.704734	5.96899e-06	42	0.119105	NAM_JL_26	δT, γT, ΣT, δT3, γT3, ΣT3, ΣTT3	5_93326739	0.57	3258704	3251998
ΣTT3	10_83282461	10	83282461	Zm00001d024675	83281590	83288964	+		RNA-binding (RRM/RBD/RNP motifs) family protein	gene	protein_coding		871			within	0.00282903	0.000135518	11	0.0496928	6.04761e-06	43	0.121941	NAM_JL_51	αT3, ΣT3			0
ΣTT3	8_52691010	8	52691010	Zm00001d009292	52707946	52709109	-	floury3	PLATZ transcription factor family protein	gene	protein_coding		-16936			16936	7.37229e-05	0.00521263	174	0.78605	6.06098e-06	44	0.124777					0
ΣTT3	7_146754379	7	146754379	Zm00001d021241	146744186	146756271	-			gene	protein_coding		10193	ΣTT3_35		within	1.09473e-06	0.352222	8260	37.3148	6.08013e-06	45	0.127613					0
ΣTT3	2_214799453	2	214799453	Zm00001d006705	214797523	214800816	+		ARM repeat superfamily protein	gene	protein_coding		1930			within	0.000847389	0.000465994	21	0.0948681	6.21724e-06	46	0.130448					0
ΣTT3	1_286390382	1	286390382	Zm00001d034198	286411877	286413004	+		Protein PHLOEM PROTEIN 2-LIKE A10	gene	protein_coding		-21495			21495	0.000558074	0.000710742	32	0.144561	6.2433e-06	47	0.133284					0
ΣTT3	5_25313346	5	25313346	Zm00001d013936	25242212	25245116	+			gene	protein_coding		71134	ΣTT3_25		68230	4.36663e-07	1			6.83121e-06	48	0.13612	NAM_JL_24	αT, δT, γT, ΣT, δT3, γT3, ΣTT3	5_25435977	0.36	122631	190861
ΣTT3	1_230614433	1	230614433	Zm00001d032563	230613798	230614382	-			gene	protein_coding		635	ΣTT3_5		51	4.32935e-06	0.101897	2624	11.854	6.89686e-06	49	0.138956	NAM_JL_5	αT, δT, γT, ΣT, δT3, γT3, ΣTT3	1_231643164	0.67	1028731	1028782
ΣTT3	5_81801891	5	81801891	Zm00001d015260	81788079	81795079	+		DNA-binding protein BIN4	gene	protein_coding		13812			6812	0.000599777	0.000751496	34	0.153596	7.03698e-06	50	0.141792					0
ΣTT3	1_231258767	1	231258767	Zm00001d032582	231197140	231210494	-			gene	protein_coding		61627	ΣTT3_5		48273	5.62099e-07	0.848641	18963	85.6659	7.42039e-06	51	0.144628	NAM_JL_5	αT, δT, γT, ΣT, δT3, γT3, ΣTT3	1_231643164	0.67	384397	432670
ΣTT3	8_116252266	8	116252266	Zm00001d010459	116264102	116265454	+		Putative CBL-interacting protein kinase family protein	gene	protein_coding		-11836			11836	0.00195359	0.000248018	16	0.0722804	7.52958e-06	52	0.147463					0
ΣTT3	1_230862687	1	230862687	Zm00001d032571	230863189	230864361	-		LisH/CRA/RING-U-box domains-containing protein	gene	protein_coding		-502	ΣTT3_5		502	1.03156e-06	0.474994	10933	49.3901	7.60892e-06	53	0.150299	NAM_JL_5	αT, δT, γT, ΣT, δT3, γT3, ΣTT3	1_231643164	0.67	780477	778803
ΣTT3	5_196308655	5	196308655	Zm00001d017454	196309360	196310577	+			gene	protein_coding		-705	ΣTT3_28		705	1.06864e-06	0.488488	11253	50.8357	8.0733e-06	54	0.153135	NAM_JL_27	δT			0
ΣTT3	4_37973747	4	37973747	Zm00001d049624	37970635	37973407	-		Magnesium transporter CorA-like family protein	gene	protein_coding		3112			340	0.0101895	5.18638e-05	6	0.0271052	8.16657e-06	55	0.155971	NAM_JL_21	δT, γT, ΣT, αT3, δT3, γT3, ΣT3, ΣTT3	4_43284283	0.57	5310536	5310876
ΣTT3	1_231647351	1	231647351	Zm00001d032600	231640138	231644331	-		RING/U-box superfamily protein	gene	protein_coding		7213	ΣTT3_5		3020	1.59018e-06	0.345855	8118	36.6733	8.4769e-06	56	0.158807	NAM_JL_5	αT, δT, γT, ΣT, δT3, γT3, ΣTT3	1_231643164	0.67	4187	within
ΣTT3	1_231258767	1	231258767	Zm00001d032583	231199003	231199076	+			ncRNA_gene	tRNA		59764	ΣTT3_5		59691	5.62099e-07	1			8.6516e-06	57	0.161643	NAM_JL_5	αT, δT, γT, ΣT, δT3, γT3, ΣTT3	1_231643164	0.67	384397	444088
ΣTT3	1_231258767	1	231258767	Zm00001d032584	231200272	231203229	+		Actin-11	gene	protein_coding		58495	ΣTT3_5		55538	5.62099e-07	1			8.6516e-06	58	0.164478	NAM_JL_5	αT, δT, γT, ΣT, δT3, γT3, ΣTT3	1_231643164	0.67	384397	439935
ΣTT3	1_231406358	1	231406358	Zm00001d032588	231396624	231401913	-		Succinate dehydrogenase subunit 3-2 mitochondrial	gene	protein_coding		9734	ΣTT3_5		4445	1.13833e-06	0.511503	11729	52.9861	8.94141e-06	59	0.167314	NAM_JL_5	αT, δT, γT, ΣT, δT3, γT3, ΣTT3	1_231643164	0.67	236806	241251
ΣTT3	5_168202688	5	168202688	Zm00001d016581	168223687	168255407	+		DNA polymerase epsilon catalytic subunit A	gene	protein_coding		-20999			20999	0.0176016	3.57785e-05	5	0.0225876	9.62143e-06	60	0.17015					0
ΣTT3	1_231174813	1	231174813	Zm00001d032579	231178877	231179514	-			gene	protein_coding		-4064	ΣTT3_5		4064	6.33824e-07	1			9.67944e-06	61	0.172986	NAM_JL_5	αT, δT, γT, ΣT, δT3, γT3, ΣTT3	1_231643164	0.67	468351	463650
ΣTT3	5_24850845	5	24850845	Zm00001d013920	24847545	24853940	-		Phosphatidylinositol 4-phosphate 5-kinase 9	gene	protein_coding		3300	ΣTT3_25		within	5.09628e-06	0.124614	3139	14.1805	9.69718e-06	62	0.175822	NAM_JL_24	αT, δT, γT, ΣT, δT3, γT3, ΣTT3	5_25435977	0.36	585132	582037
ΣTT3	2_237101211	2	237101211	Zm00001d007661	237091675	237098914	-		Glutathione synthetase chloroplastic	gene	protein_coding		9536	ΣTT3_14		2297	2.60467e-05	0.0244792	731	3.30231	9.73332e-06	63	0.178658					0
ΣTT3	6_119207521	6	119207521	Zm00001d037278	119172801	119179266	-	phosphofructose kinase1	phosphofructose kinase1	gene	protein_coding		34720	ΣTT3_32		28255	3.86334e-06	0.173723	4280	19.335	1.02111e-05	64	0.181493	NAM_JL_31	δT, γT, ΣT, αT3, δT3, ΣTT3	6_113332877	0.17	5874644	5839924
ΣTT3	9_18796881	9	18796881	Zm00001d045313	18798784	18800901	-		F-box protein MAX2	gene	protein_coding		-1903	ΣTT3_42		1903	1.34546e-05	0.049934	1378	6.22515	1.02209e-05	65	0.184329					0
ΣTT3	9_105196748	9	105196748	Zm00001d046772	105169464	105172457	+		Putative O-Glycosyl hydrolase superfamily protein	gene	protein_coding		27284			24291	0.000530596	0.00131712	52	0.234911	1.06044e-05	66	0.187165	NAM_JL_45	αT, δT, γT, ΣT, αT3, δT3, γT3, ΣT3, ΣTT3	9_94142626	0.18	11054122	11026838
ΣTT3	1_255390227	1	255390227	Zm00001d033237	255361226	255391452	-		Uncharacterised conserved protein UCP031088 alpha/beta hydrolase	gene	protein_coding		29001			within	0.0094687	8.71578e-05	9	0.0406578	1.23853e-05	67	0.190001					0
ΣTT3	2_40110342	2	40110342	Zm00001d003319	40110400	40119860	+		OSJNBb0022F23.18 protein	gene	protein_coding		-58	ΣTT3_11		58	3.96664e-06	0.211945	5109	23.0801	1.26014e-05	68	0.192837	NAM_JL_10	δT, γT, αT3, γT3, ΣT3			0
ΣTT3	8_13723119	8	13723119	Zm00001d008591	13719470	13722383	-		Octicosapeptide/Phox/Bem1p family protein	gene	protein_coding		3649			736	0.00197921	0.000427185	18	0.0813155	1.26683e-05	69	0.195673					0
ΣTT3	1_231425128	1	231425128	Zm00001d032589	231420001	231423056	+		hAT transposon superfamily protein	gene	protein_coding		5127	ΣTT3_5		2072	8.81457e-07	1			1.31705e-05	70	0.198508	NAM_JL_5	αT, δT, γT, ΣT, δT3, γT3, ΣTT3	1_231643164	0.67	218036	220108
ΣTT3	2_13758906	2	13758906	Zm00001d002485	13754420	13757455	-		Putative WEB family protein chloroplastic	gene	protein_coding		4486			1451	0.000282454	0.00313184	108	0.487893	1.32143e-05	71	0.201344					0
ΣTT3	1_230726054	1	230726054	Zm00001d032567	230714286	230732552	-		Mediator of RNA polymerase II transcription subunit 16	gene	protein_coding		11768	ΣTT3_5		within	1.39463e-06	0.637268	14498	65.4951	1.32722e-05	72	0.20418	NAM_JL_5	αT, δT, γT, ΣT, δT3, γT3, ΣTT3	1_231643164	0.67	917110	910612
ΣTT3	2_19213481	2	19213481	Zm00001d002685	19212994	19214316	-		Thioredoxin-like 3-3	gene	protein_coding		487			within	0.00590491	0.000154154	13	0.0587279	1.35717e-05	73	0.207016					0
ΣTT3	2_215021452	2	215021452	Zm00001d006713	215022021	215022959	+			gene	protein_coding		-569	ΣTT3_13		569	1.3489e-05	0.0682369	1826	8.24901	1.37132e-05	74	0.209852					0
ΣTT3	5_20613957	5	20613957	Zm00001d013799	20611347	20612617	+		Membrane metalloprotease ARASP chloroplastic	gene	protein_coding		2610			1340	7.31257e-05	0.0127897	402	1.81605	1.39189e-05	75	0.212688	NAM_JL_24	αT, δT, γT, ΣT, δT3, γT3, ΣTT3	5_25435977	0.36	4822020	4823360
ΣTT3	5_1589052	5	1589052	Zm00001d012884	1587906	1593592	+		FAD/NAD(P)-binding oxidoreductase family protein	gene	protein_coding		1146			within	0.000934505	0.00106065	44	0.198771	1.46936e-05	76	0.215523	NAM_JL_23	δT3, ΣTT3	5_2340670	0.14	751618	747078
ΣTT3	7_146762244	7	146762244	Zm00001d021242	146763235	146765187	-			gene	protein_coding		-991	ΣTT3_35		991	1.03106e-06	1			1.52441e-05	77	0.218359					0
ΣTT3	2_11622785	2	11622785	Zm00001d002382	11626085	11630946	+		Core-2/I-branching beta-16-N-acetylglucosaminyltransferase family protein	gene	protein_coding		-3300	ΣTT3_8		3300	1.09721e-05	0.0940118	2456	11.095	1.52503e-05	78	0.221195					0
ΣTT3	8_13690796	8	13690796	Zm00001d008588	13687969	13690095	-		cytochrome P450 family 77 subfamily A polypeptide 5 pseudogene	gene	protein_coding		2827	ΣTT3_37		701	7.50862e-06	0.140741	3491	15.7707	1.55982e-05	79	0.224031					0
ΣTT3	9_95915719	9	95915719	Zm00001d046558	95895575	95899061	+	homogentisate geranylgeranyl transferase1	homogentisate geranylgeranyl transferase1	gene	protein_coding	Yes	20144			16658	7.82836e-05	0.0138431	436	1.96964	1.59683e-05	80	0.226867	NAM_JL_45	αT, δT, γT, ΣT, αT3, δT3, γT3, ΣT3, ΣTT3	9_94142626	0.18	1773093	1752949
ΣTT3	1_231439051	1	231439051	Zm00001d032590	231427968	231433366	+			gene	protein_coding		11083	ΣTT3_5		5685	1.13833e-06	1			1.67175e-05	81	0.229703	NAM_JL_5	αT, δT, γT, ΣT, δT3, γT3, ΣTT3	1_231643164	0.67	204113	209798
ΣTT3	1_231673279	1	231673279	Zm00001d032601	231674392	231677680	-		ABC transporter G family member 11	gene	protein_coding		-1113	ΣTT3_5		1113	4.06208e-06	0.282573	6719	30.3533	1.68475e-05	82	0.232538	NAM_JL_5	αT, δT, γT, ΣT, δT3, γT3, ΣTT3	1_231643164	0.67	30115	31228
ΣTT3	1_230528837	1	230528837	Zm00001d032559	230528661	230528733	-			ncRNA_gene	tRNA		176	ΣTT3_5		104	1.18111e-06	1			1.73022e-05	83	0.235374	NAM_JL_5	αT, δT, γT, ΣT, δT3, γT3, ΣTT3	1_231643164	0.67	1114327	1114431
ΣTT3	3_156033471	3	156033471	Zm00001d042202	156030658	156033522	+		Protein indeterminate-domain 11	gene	protein_coding		2813			within	0.00012755	0.00940821	312	1.40947	1.75601e-05	84	0.23821	NAM_JL_15	αT			0
ΣTT3	1_231517855	1	231517855	Zm00001d032592	231532863	231532935	+			ncRNA_gene	tRNA		-15008	ΣTT3_5		15008	1.21886e-06	1			1.78167e-05	85	0.241046	NAM_JL_5	αT, δT, γT, ΣT, δT3, γT3, ΣTT3	1_231643164	0.67	125309	110229
ΣTT3	5_24958760	5	24958760	Zm00001d013924	24948366	24954210	-		Phosphoinositide phosphatase SAC2	gene	protein_coding		10394	ΣTT3_25		4550	1.24725e-06	1			1.82031e-05	86	0.243882	NAM_JL_24	αT, δT, γT, ΣT, δT3, γT3, ΣTT3	5_25435977	0.36	477217	481767
ΣTT3	1_255510762	1	255510762	Zm00001d033240	255510009	255515376	+		BTB/POZ domain-containing protein	gene	protein_coding		753	ΣTT3_6		within	2.77615e-05	0.0452183	1266	5.71919	1.83128e-05	87	0.246718					0
ΣTT3	5_26392236	5	26392236	Zm00001d013962	26410069	26414233	+		RING/U-box superfamily protein	gene	protein_coding		-17833	ΣTT3_25		17833	1.06448e-05	0.118255	2998	13.5435	1.83601e-05	88	0.249553	NAM_JL_24	αT, δT, γT, ΣT, δT3, γT3, ΣTT3	5_25435977	0.36	956259	974092
ΣTT3	5_25847373	5	25847373	Zm00001d013949	25847189	25847818	-		Ripening-related protein 3	gene	protein_coding		184	ΣTT3_25		within	1.32412e-06	1			1.92458e-05	89	0.252389	NAM_JL_24	αT, δT, γT, ΣT, δT3, γT3, ΣTT3	5_25435977	0.36	411396	411212
ΣTT3	8_16433769	8	16433769	Zm00001d008666	16426215	16435539	-		DCD (Development and Cell Death) domain protein	gene	protein_coding		7554	ΣTT3_38		within	3.67501e-06	0.365158	8529	38.53	1.94871e-05	90	0.255225					0
ΣTT3	5_29802290	5	29802290	Zm00001d014033	29808369	29824010	-		Transportin MOS14	gene	protein_coding		-6079	ΣTT3_25		6079	1.2313e-05	0.11107	2835	12.8072	1.98336e-05	91	0.258061	NAM_JL_24	αT, δT, γT, ΣT, δT3, γT3, ΣTT3	5_25435977	0.36	4366313	4372392
ΣTT3	1_220374998	1	220374998	Zm00001d032283	220368811	220372532	+			gene	protein_coding		6187			2466	0.00022108	0.00622035	212	0.957716	1.9936e-05	92	0.260897					0
ΣTT3	1_231548763	1	231548763	Zm00001d032597	231553045	231559488	-		Nucleic acid binding protein	gene	protein_coding		-4282	ΣTT3_5		4282	1.67159e-06	0.852157	19028	85.9595	2.06001e-05	93	0.263733	NAM_JL_5	αT, δT, γT, ΣT, δT3, γT3, ΣTT3	1_231643164	0.67	94401	83676
ΣTT3	5_88780012	5	88780012	Zm00001d015409	88962266	88972559	+		AT5G44030 (E%3D6e-024) CESA4 IRX5 NWS2 | CESA4 (CELLULOSE SYNTHASE A4)%3B cellulose synthase/ transferase transferring glycosyl groups	gene	protein_coding		-182254	ΣTT3_26		182254	1.42714e-06	1			2.06362e-05	94	0.266568	NAM_JL_26	δT, γT, ΣT, δT3, γT3, ΣT3, ΣTT3	5_93326739	0.57	4546727	4354180
ΣTT3	1_231611868	1	231611868	Zm00001d022936	231609214	231610002	+			ncRNA_gene	lincRNA		2654	ΣTT3_5		1866	1.43361e-06	1			2.07233e-05	95	0.269404	NAM_JL_5	αT, δT, γT, ΣT, δT3, γT3, ΣTT3	1_231643164	0.67	31296	33162
ΣTT3	1_230529904	1	230529904	Zm00001d032560	230529377	230531598	-		CBS domain-containing protein CBSX5	gene	protein_coding		527	ΣTT3_5		within	6.66211e-06	0.219474	5263	23.7757	2.11072e-05	96	0.27224	NAM_JL_5	αT, δT, γT, ΣT, δT3, γT3, ΣTT3	1_231643164	0.67	1113260	1111566
ΣTT3	4_232244525	4	232244525	Zm00001d053453	232245967	232253821	-	phosphoenolpyruvate carboxylase3	Phosphoenolpyruvate carboxylase isoform 1%253B Phosphoenolpyruvate carboxylase isoform 2	gene	protein_coding		-1442	ΣTT3_23		1442	8.99175e-06	0.163446	4019	18.1559	2.1208e-05	97	0.275076					0
ΣTT3	9_35636190	9	35636190	Zm00001d045729	35624307	35627408	+		Protein NSP-INTERACTING KINASE 1	gene	protein_coding		11883			8782	0.0018436	0.000820318	37	0.167149	2.17805e-05	98	0.277912	NAM_JL_45	αT, δT, γT, ΣT, αT3, δT3, γT3, ΣT3, ΣTT3	9_94142626	0.18	58506436	58515218
ΣTT3	8_148341843	8	148341843	Zm00001d011358	148347246	148348913	-		Putative RING zinc finger domain superfamily protein	gene	protein_coding		-5403			5403	0.000552701	0.00287969	102	0.460788	2.28408e-05	99	0.280748	NAM_JL_41	αT, γT, ΣT, δT3, ΣTT3	8_148002256	0.21	339587	344990
ΣTT3	5_205912779	5	205912779	Zm00001d017754	205924278	205940214	-		yeast YAK1-related gene 1	gene	protein_coding		-11499			11499	0.000261935	0.00616705	208	0.939646	2.31578e-05	100	0.283583	NAM_JL_28	αT, γT, αT3, γT3			0
ΣTT3	1_230661277	1	230661277	Zm00001d032565	230664256	230666245	+		Microtubule-associated protein RP/EB family member 1C	gene	protein_coding		-2979	ΣTT3_5		2979	4.80764e-06	0.343328	8052	36.3751	2.36273e-05	101	0.286419	NAM_JL_5	αT, δT, γT, ΣT, δT3, γT3, ΣTT3	1_231643164	0.67	981887	976919
ΣTT3	8_19032800	8	19032800	Zm00001d008752	18999372	19006082	-		Calcium-dependent lipid-binding (CaLB domain) family protein	gene	protein_coding		33428			26718	0.000729193	0.00226965	81	0.36592	2.3686e-05	102	0.289255					0
ΣTT3	3_2796160	3	2796160	Zm00001d039378	2791183	2793926	+			gene	protein_coding		4977			2234	0.00244321	0.000689527	31	0.140043	2.40804e-05	103	0.292091					0
ΣTT3	10_4274283	10	4274283	Zm00001d023376	4272268	4274843	-	aluminum-induced protein homolog1	aluminum-induced protein homolog1	gene	protein_coding		2015			within	0.000486639	0.00351144	127	0.573726	2.44012e-05	104	0.294927					0
ΣTT3	5_196094097	5	196094097	Zm00001d017448	196097028	196100351	-		Vesicle-associated protein 2-1	gene	protein_coding		-2931	ΣTT3_28		2931	2.95777e-06	0.579662	13207	59.663	2.4477e-05	105	0.297763	NAM_JL_27	δT			0
ΣTT3	9_114919605	9	114919605	Zm00001d047003	114946402	114947166	-			gene	protein_coding		-26797			26797	0.00100236	0.00175648	63	0.284604	2.50887e-05	106	0.300598					0
ΣTT3	5_24985941	5	24985941	Zm00001d013926	24983948	24987816	+		Formin-like protein 6	gene	protein_coding		1993	ΣTT3_25		within	1.91094e-05	0.0935303	2441	11.0273	2.5442e-05	107	0.303434	NAM_JL_24	αT, δT, γT, ΣT, δT3, γT3, ΣTT3	5_25435977	0.36	450036	448161
ΣTT3	7_22640211	7	22640211	Zm00001d019225	22609239	22613134	-		Amino acid transporter ANT1	gene	protein_coding		30972			27077	9.32437e-05	0.0192914	587	2.65179	2.5594e-05	108	0.30627	NAM_JL_36	δT, αT3, δT3			0
ΣTT3	5_26468495	5	26468495	Zm00001d013964	26495725	26501623	-		ALG2-interacting protein X	gene	protein_coding		-27230			27230	7.47649e-05	0.0244131	730	3.2978	2.59436e-05	109	0.309106	NAM_JL_24	αT, δT, γT, ΣT, δT3, γT3, ΣTT3	5_25435977	0.36	1032518	1059748
ΣTT3	2_39665808	2	39665808	Zm00001d003308	39659891	39663833	-		Ribonuclease H2 subunit B	gene	protein_coding		5917	ΣTT3_11		1975	9.22207e-06	0.199916	4861	21.9597	2.61867e-05	110	0.311942	NAM_JL_10	δT, γT, αT3, γT3, ΣT3			0
ΣTT3	5_23138139	5	23138139	Zm00001d013860	23136709	23154188	+		SH3 domain-containing protein 2	gene	protein_coding		1430	ΣTT3_25		within	1.58501e-05	0.11868	3009	13.5932	2.66808e-05	111	0.314778	NAM_JL_24	αT, δT, γT, ΣT, δT3, γT3, ΣTT3	5_25435977	0.36	2297838	2281789
ΣTT3	5_30557040	5	30557040	Zm00001d014046	30559090	30562350	+	cyclin-dependent kinase inhibitor2	Cyclin-dependent kinase inhibitor 5	gene	protein_coding		-2050			2050	5.78954e-05	0.0338376	978	4.41814	2.77068e-05	112	0.317613	NAM_JL_24	αT, δT, γT, ΣT, δT3, γT3, ΣTT3	5_25435977	0.36	5121063	5123113
ΣTT3	1_279984235	1	279984235	Zm00001d033981	279982395	279986186	-	ATP sulfurylase1	ATP sulfurylase1	gene	protein_coding		1840			within	0.00322748	0.000613329	26	0.117456	2.79757e-05	113	0.320449					0
ΣTT3	4_1451491	4	1451491	Zm00001d048617	1457925	1458461	-		Putative RING zinc finger domain superfamily protein	gene	protein_coding		-6434	ΣTT3_20		6434	2.01546e-06	1			2.84476e-05	114	0.323285					0
ΣTT3	3_216716469	3	216716469	Zm00001d044017	216717307	216725476	-		Probable plastid-lipid-associated protein 14 chloroplastic	gene	protein_coding		-838			838	0.0381139	5.42476e-05	7	0.0316227	2.91305e-05	115	0.326121					0
ΣTT3	5_83016306	5	83016306	Zm00001d015293	82992330	82999777	-		VIN3-like protein 2	gene	protein_coding		23976			16529	0.00333081	0.000640878	27	0.121973	3.00071e-05	116	0.328957					0
ΣTT3	7_127456071	7	127456071	Zm00001d020670	127456340	127458007	-	Homeobox-transcription factor 11	Homeobox-leucine zipper protein HAT3	gene	protein_coding		-269			269	5.35131e-05	0.040039	1134	5.12288	3.01112e-05	117	0.331793					0
ΣTT3	5_26529475	5	26529475	Zm00001d013966	26539982	26542353	+		Succinate dehydrogenase subunit 3	gene	protein_coding		-10507	ΣTT3_25		10507	1.88336e-05	0.117952	2988	13.4984	3.1139e-05	118	0.334628	NAM_JL_24	αT, δT, γT, ΣT, δT3, γT3, ΣTT3	5_25435977	0.36	1093498	1104005
ΣTT3	2_35414308	2	35414308	Zm00001d003199	35413857	35417683	-		CCR-like	gene	protein_coding		451			within	0.000107252	0.0208262	618	2.79183	3.12977e-05	119	0.337464	NAM_JL_10	δT, γT, αT3, γT3, ΣT3			0
ΣTT3	6_133717179	6	133717179	Zm00001d037674	133714246	133717685	+	tryptophan aminotransferase related3	Alliin lyase	gene	protein_coding		2933			within	0.00162758	0.00137266	54	0.243947	3.13036e-05	120	0.3403	NAM_JL_32	αT, γT3, ΣT3, ΣTT3	6_132532291	0.06	1184888	1181955
ΣTT3	5_18931002	5	18931002	Zm00001d013737	18922953	18925765	-		Serpin-Z1	gene	protein_coding		8049			5237	0.000603175	0.00378106	134	0.605349	3.19086e-05	121	0.343136	NAM_JL_24	αT, δT, γT, ΣT, δT3, γT3, ΣTT3	5_25435977	0.36	6504975	6510212
ΣTT3	6_91501274	6	91501274	Zm00001d036540	91500847	91504496	+		mRNA-decapping enzyme subunit 2	gene	protein_coding		427	ΣTT3_31		within	1.76157e-05	0.132508	3324	15.0163	3.26039e-05	122	0.345972	NAM_JL_30	γT, ΣT, δT3, γT3, ΣT3, ΣTT3	6_73625378	0.22	17875896	17875469
ΣTT3	7_166828276	7	166828276	Zm00001d021948	166828550	166830651	+		Probable serine/threonine-protein kinase WNK11	gene	protein_coding		-274			274	0.00325686	0.000736182	33	0.149078	3.34256e-05	123	0.348808					0
ΣTT3	5_30847002	5	30847002	Zm00001d014055	30845333	30853050	+		Protein ECERIFERUM 1	gene	protein_coding		1669			within	9.74322e-05	0.0255418	766	3.46043	3.46009e-05	124	0.351643					0
ΣTT3	8_74317549	8	74317549	Zm00001d009648	74317968	74318441	-		Oleosin Bn-V	gene	protein_coding		-419			419	0.011916	0.000212171	14	0.0632454	3.5112e-05	125	0.354479					0
ΣTT3	8_120675669	8	120675669	Zm00001d010572	120659293	120673593	+		E3 ubiquitin-protein ligase UPL4	gene	protein_coding		16376	ΣTT3_40		2076	3.83699e-05	0.0688606	1835	8.28966	3.6578e-05	126	0.357315					0
ΣTT3	5_31302531	5	31302531	Zm00001d014066	31262944	31263321	-			gene	protein_coding		39587	ΣTT3_25		39210	3.74052e-05	0.0722005	1924	8.69172	3.73287e-05	127	0.360151					0
ΣTT3	5_21624999	5	21624999	Zm00001d013828	21546382	21565664	+		Switch 2	gene	protein_coding		78617			59335	0.000284332	0.00966784	320	1.44561	3.79464e-05	128	0.362987	NAM_JL_24	αT, δT, γT, ΣT, δT3, γT3, ΣTT3	5_25435977	0.36	3810978	3870313
ΣTT3	8_43571059	8	43571059	Zm00001d009212	43471863	43480271	-		dihydrolipoyl dehydrogenases	gene	protein_coding		99196			90788	0.00198933	0.00138218	55	0.248464	3.79559e-05	129	0.365823					0
ΣTT3	9_96322735	9	96322735	Zm00001d046569	96322136	96327889	-		Protein kinase superfamily protein with octicosapeptide/Phox/Bem1p domain	gene	protein_coding		599	ΣTT3_43		within	6.10508e-06	0.454035	10476	47.3256	3.82413e-05	130	0.368658	NAM_JL_45	αT, δT, γT, ΣT, αT3, δT3, γT3, ΣT3, ΣTT3	9_94142626	0.18	2180109	2179510
ΣTT3	8_120754248	8	120754248	Zm00001d010578	120771225	120776089	-		Protein kinase superfamily protein	gene	protein_coding		-16977	ΣTT3_40		16977	7.09577e-06	0.397157	9187	41.5025	3.88323e-05	131	0.371494					0
ΣTT3	7_146768322	7	146768322	Zm00001d021243	146768955	146770070	-			gene	protein_coding		-633	ΣTT3_35		633	4.31343e-06	0.674962	15319	69.204	4.00227e-05	132	0.37433					0
ΣTT3	6_91327666	6	91327666	Zm00001d036533	91324082	91328565	+		protein%3B Ternary complex factor MIP1-like	gene	protein_coding		3584			within	7.21706e-05	0.0423417	1202	5.43007	4.186e-05	133	0.377166	NAM_JL_30	γT, ΣT, δT3, γT3, ΣT3, ΣTT3	6_73625378	0.22	17702288	17698704
ΣTT3	1_244416444	1	244416444	Zm00001d032948	244409830	244413837	-		3-ketoacyl-CoA synthase	gene	protein_coding		6614			2607	0.0559518	5.56995e-05	8	0.0361402	4.26298e-05	134	0.380002					0
ΣTT3	2_214253838	2	214253838	Zm00001d006684	214241634	214255713	-		Transferase%252C transferring glycosyl groups	gene	protein_coding		12204	ΣTT3_13		within	3.18585e-06	0.990954	21956	99.1868	4.31436e-05	135	0.382838					0
ΣTT3	2_214674648	2	214674648	Zm00001d006700	214673600	214677670	+	mTERF-domain protein9	mTERF family protein	gene	protein_coding		1048			within	0.000110622	0.0289382	846	3.82183	4.37026e-05	136	0.385673					0
ΣTT3	5_25913783	5	25913783	Zm00001d013950	25864653	25865518	-		Plant basic secretory protein (BSP) family protein	gene	protein_coding		49130	ΣTT3_25		48265	3.28756e-06	1			4.47942e-05	137	0.388509	NAM_JL_24	αT, δT, γT, ΣT, δT3, γT3, ΣTT3	5_25435977	0.36	477806	428676
ΣTT3	2_214893410	2	214893410	Zm00001d006708	214892586	214893899	+		C2 domain containing protein	gene	protein_coding		824			within	0.000103626	0.0319547	929	4.19678	4.50944e-05	138	0.391345					0
ΣTT3	1_230622847	1	230622847	Zm00001d032564	230626458	230626757	+			gene	protein_coding		-3611	ΣTT3_5		3611	3.31232e-06	1			4.51067e-05	139	0.394181	NAM_JL_5	αT, δT, γT, ΣT, δT3, γT3, ΣTT3	1_231643164	0.67	1020317	1016407
ΣTT3	7_134936589	7	134936589	Zm00001d020862	134954297	134958341	+		Probable LRR receptor-like serine/threonine-protein kinase	gene	protein_coding		-17708			17708	0.000887032	0.00383858	136	0.614384	4.62741e-05	140	0.397017					0
ΣTT3	4_19764708	4	19764708	Zm00001d049188	19758370	19765128	-		Bifunctional dihydrofolate reductase-thymidylate synthase	gene	protein_coding		6338			within	6.05094e-05	0.0579088	1596	7.20997	4.75202e-05	141	0.399853					0
ΣTT3	8_120754248	8	120754248	Zm00001d010577	120764599	120767763	-			gene	protein_coding		-10351	ΣTT3_40		10351	7.09577e-06	0.494256	11375	51.3869	4.75592e-05	142	0.402688					0
ΣTT3	10_127563840	10	127563840	Zm00001d025722	127556445	127565804	+		ATP-dependent DNA helicase Q-like 5	gene	protein_coding		7395			within	0.000995671	0.00356957	130	0.587279	4.8149e-05	143	0.405524					0
ΣTT3	9_108417830	9	108417830	Zm00001d046855	108417554	108419212	+		GDP-L-fucose synthase 1	gene	protein_coding		276			within	0.000785308	0.00455722	153	0.691182	4.84589e-05	144	0.40836					0
ΣTT3	2_214203348	2	214203348	Zm00001d006681	214205144	214217344	+			gene	protein_coding		-1796	ΣTT3_13		1796	5.86501e-06	0.636304	14480	65.4138	5.03757e-05	145	0.411196					0
ΣTT3	1_230476681	1	230476681	Zm00001d032558	230456520	230456810	+			gene	protein_coding		20161	ΣTT3_5		19871	3.76311e-06	1			5.07653e-05	146	0.414032	NAM_JL_5	αT, δT, γT, ΣT, δT3, γT3, ΣTT3	1_231643164	0.67	1166483	1186354
ΣTT3	9_25851715	9	25851715	Zm00001d045540	25852225	25855075	+			gene	protein_coding		-510			510	0.000181414	0.0211882	630	2.84604	5.17729e-05	147	0.416868					0
ΣTT3	6_133597525	6	133597525	Zm00001d037672	133574540	133578520	-		Putative leucine-rich repeat receptor protein kinase family protein	gene	protein_coding		22985	ΣTT3_33		19005	1.82337e-05	0.218035	5230	23.6267	5.34135e-05	148	0.419703	NAM_JL_32	αT, γT3, ΣT3, ΣTT3	6_132532291	0.06	1065234	1042249
ΣTT3	9_31072798	9	31072798	Zm00001d045650	31087032	31092256	+		Signal recognition particle 9 kDa protein	gene	protein_coding		-14234	ΣTT3_43		14234	1.22265e-05	0.32529	7658	34.5952	5.34332e-05	149	0.422539	NAM_JL_45	αT, δT, γT, ΣT, αT3, δT3, γT3, ΣT3, ΣTT3	9_94142626	0.18	63069828	63050370
ΣTT3	3_219987778	3	219987778	Zm00001d044129	219979958	219989574	-	shrunken2	Glucose-1-phosphate adenylyltransferase large subunit 1%252C chloroplastic/amyloplastic	gene	protein_coding		7820			within	0.000514312	0.0077458	257	1.161	5.3515e-05	150	0.425375					0
ΣTT3	5_28984121	5	28984121	Zm00001d014021	28982317	28983657	+		Expressed protein%3B protein	gene	protein_coding		1804			464	7.86927e-05	0.0511647	1417	6.40134	5.40435e-05	151	0.428211	NAM_JL_24	αT, δT, γT, ΣT, δT3, γT3, ΣTT3	5_25435977	0.36	3548144	3546340
ΣTT3	3_114485868	3	114485868	Zm00001d041365	114433709	114437553	-		Bifunctional nuclease 1	gene	protein_coding		52159			48315	0.000429321	0.00938048	310	1.40043	5.40552e-05	152	0.431047	NAM_JL_14	αT3, δT3, γT3, ΣT3			0
ΣTT3	3_115229600	3	115229600	Zm00001d041383	115222850	115230962	-		EXS%252C C-terminal	gene	protein_coding		6750			within	0.000857499	0.0046991	158	0.713769	5.40831e-05	153	0.433883	NAM_JL_14	αT3, δT3, γT3, ΣT3			0
ΣTT3	3_211027099	3	211027099	Zm00001d043826	211031093	211031347	-			gene	protein_coding		-3994			3994	0.0005252	0.00774417	256	1.15649	5.4552e-05	154	0.436718	NAM_JL_18	αT, γT, ΣT, δT3			0
ΣTT3	5_7977427	5	7977427	Zm00001d013294	7976659	7989206	+			gene	protein_coding		768			within	0.000144899	0.0280843	831	3.75407	5.45786e-05	155	0.439554					0
ΣTT3	5_85123015	5	85123015	Zm00001d015338	85119954	85121228	+		OSJNBa0058K23.8 protein%3B protein	gene	protein_coding		3061	ΣTT3_26		1787	1.14136e-05	0.356801	8362	37.7756	5.4616e-05	156	0.44239	NAM_JL_26	δT, γT, ΣT, δT3, γT3, ΣT3, ΣTT3	5_93326739	0.57	8203724	8205511
ΣTT3	9_108229762	9	108229762	Zm00001d046838	108226063	108230008	+		Putative receptor-like protein kinase family protein	gene	protein_coding		3699			within	5.08127e-05	0.0890457	2337	10.5575	6.02049e-05	157	0.445226					0
ΣTT3	8_13342975	8	13342975	Zm00001d008573	13343616	13344233	-		Calmodulin protein 2%252C touch-induced	gene	protein_coding		-641			641	0.000101889	0.0447239	1254	5.66498	6.06013e-05	158	0.448062					0
ΣTT3	8_17627646	8	17627646	Zm00001d008716	17623710	17628383	-		NEP-interacting protein 1	gene	protein_coding		3936	ΣTT3_39		within	1.30461e-05	0.353572	8284	37.4232	6.12881e-05	159	0.450898					0
ΣTT3	5_26224065	5	26224065	Zm00001d013958	26237325	26241411	-			gene	protein_coding		-13260	ΣTT3_25		13260	1.8214e-05	0.256185	6113	27.6156	6.1944e-05	160	0.453733	NAM_JL_24	αT, δT, γT, ΣT, δT3, γT3, ΣTT3	5_25435977	0.36	788088	801348
ΣTT3	8_166832309	8	166832309	Zm00001d012032	166819383	166835118	+		Transcription factor TFIIE alpha subunit	gene	protein_coding		12926			within	0.000416217	0.0115074	366	1.65342	6.34574e-05	161	0.456569					0
ΣTT3	9_27543340	9	27543340	Zm00001d045590	27537950	27546688	-		DExH-box ATP-dependent RNA helicase DExH9	gene	protein_coding		5390	ΣTT3_43		within	1.92396e-05	0.251763	5998	27.0961	6.41214e-05	162	0.459405	NAM_JL_45	αT, δT, γT, ΣT, αT3, δT3, γT3, ΣT3, ΣTT3	9_94142626	0.18	66599286	66595938
ΣTT3	5_30194303	5	30194303	Zm00001d014038	30230017	30235454	-		Casein kinase 1-like protein 6	gene	protein_coding		-35714	ΣTT3_25		35714	8.20203e-06	0.592341	13520	61.077	6.42999e-05	163	0.462241	NAM_JL_24	αT, δT, γT, ΣT, δT3, γT3, ΣTT3	5_25435977	0.36	4758326	4794040
ΣTT3	10_144818591	10	144818591	Zm00001d026382	144818522	144822103	-		G-type lectin S-receptor-like serine/threonine-protein kinase B120	gene	protein_coding		69			within	0.00221757	0.00220263	78	0.352367	6.46191e-05	164	0.465077	NAM_JL_52	δT, γT, ΣT, ΣTT3	10_145879135	0.3	1060544	1057032
ΣTT3	5_26341043	5	26341043	Zm00001d013960	26332091	26335998	+		ATP-binding cassette sub-family G member 2	gene	protein_coding		8952	ΣTT3_25		5045	7.94701e-06	0.618832	14115	63.7649	6.50271e-05	165	0.467913	NAM_JL_24	αT, δT, γT, ΣT, δT3, γT3, ΣTT3	5_25435977	0.36	905066	896114
ΣTT3	2_244297754	2	244297754	Zm00001d007965	244301133	244307913	+		mitogen-activated protein kinase kinase kinase 5	gene	protein_coding		-3379			3379	0.00215156	0.00232588	84	0.379472	6.60826e-05	166	0.470748					0
ΣTT3	8_120754248	8	120754248	Zm00001d010576	120764519	120771258	+		Haloacid dehalogenase-like hydrolase (HAD) superfamily protein	gene	protein_coding		-10271	ΣTT3_40		10271	7.09577e-06	0.708572	16010	72.3256	6.63704e-05	167	0.473584					0
ΣTT3	3_186923133	3	186923133	Zm00001d043026	186921101	186922723	-		PLAC8 family protein	gene	protein_coding		2032			410	0.000275956	0.0182926	553	2.49819	6.66154e-05	168	0.47642	NAM_JL_18	αT, γT, ΣT, δT3			0
ΣTT3	5_90697101	5	90697101	Zm00001d015446	90502234	90559505	-		Calcium-transporting ATPase 9 plasma membrane-type	gene	protein_coding		194867			137596	0.000690443	0.007383	244	1.10228	6.722e-05	169	0.479256	NAM_JL_26	δT, γT, ΣT, δT3, γT3, ΣT3, ΣTT3	5_93326739	0.57	2629638	2767234
ΣTT3	10_126879753	10	126879753	Zm00001d025706	126880549	126888843	-	CRM family member6	RNA-binding CRS1 / YhbY (CRM) domain protein	gene	protein_coding		-796			796	0.00461185	0.0011196	45	0.203289	6.80222e-05	170	0.482092					0
ΣTT3	5_28896080	5	28896080	Zm00001d014017	28892601	28900562	-			gene	protein_coding		3479	ΣTT3_25		within	1.50529e-05	0.344198	8069	36.4519	6.82386e-05	171	0.484928	NAM_JL_24	αT, δT, γT, ΣT, δT3, γT3, ΣTT3	5_25435977	0.36	3460103	3456624
ΣTT3	9_29394010	9	29394010	Zm00001d045631	29285315	29290140	+		Acyl-CoA N-acyltransferase with RING/FYVE/PHD-type zinc finger domain	gene	protein_coding		108695			103870	0.000996097	0.00530699	178	0.80412	6.95167e-05	172	0.487763	NAM_JL_45	αT, δT, γT, ΣT, αT3, δT3, γT3, ΣT3, ΣTT3	9_94142626	0.18	64748616	64852486
ΣTT3	3_155224878	3	155224878	Zm00001d042180	155197945	155203597	+		VAP27-2	gene	protein_coding		26933			21281	0.00378688	0.0014455	57	0.257499	7.17936e-05	173	0.490599					0
ΣTT3	7_138388158	7	138388158	Zm00001d020977	138407898	138409603	+			gene	protein_coding		-19740			19740	0.000503653	0.0110668	351	1.58565	7.30027e-05	174	0.493435					0
ΣTT3	4_232182391	4	232182391	Zm00001d053452	232176354	232182440	+		Polyadenylate-binding protein-interacting protein 9	gene	protein_coding		6037	ΣTT3_23		within	5.76117e-06	0.979328	21710	98.0755	7.38281e-05	175	0.496271					0
ΣTT3	8_12671738	8	12671738	Zm00001d008548	12671727	12672398	-	wound induced protein1	Bowman-Birk type wound-induced proteinase inhibitor WIP1	gene	protein_coding		11			within	0.000119667	0.0472993	1306	5.89989	7.40468e-05	176	0.499107					0
